# Supplementary material
Source: PubMed Central journal article supplement (PMC2633540)
Supplement: 0812009106_ST1_PDF.pdf [file 0812009106_ST1_PDF.pdf]

| Gene        | Selection $\lambda$ | Drift $\sigma$ | Equil. var. | p-value |
|-------------|---------------------|----------------|-------------|---------|
| FBgn0030627 | 623.457             | 20.259         | 0.329       | 0.0971  |
| FBgn0037958 | 47.674              | 2.822          | 0.084       | 0.0228  |
| FBgn0033674 | 21.723              | 3.147          | 0.228       | 0.1297  |
| FBgn0032042 | 28.092              | 4.076          | 0.296       | 0.1385  |
| FBgn0011768 | 348.273             | 6.519          | 0.061       | 0.0029  |
| FBgn0024182 | 23.084              | 3.280          | 0.233       | 0.1204  |
| FBgn0052776 | 18.920              | 4.025          | 0.428       | 0.2854  |
| FBgn0023521 | 790.178             | 15.479         | 0.152       | 0.0421  |
| FBgn0037230 | 34.935              | 2.965          | 0.126       | 0.0381  |
| FBgn0028734 | 792.761             | 13.303         | 0.112       | 0.0045  |
| FBgn0000644 | 16.830              | 3.586          | 0.382       | 0.2218  |
| FBgn0000115 | 623.195             | 13.340         | 0.143       | 0.0063  |
| FBgn0035137 | 13.963              | 2.303          | 0.190       | 0.1564  |
| FBgn0026370 | 11.838              | 2.345          | 0.232       | 0.2192  |
| FBgn0036710 | 24.387              | 1.916          | 0.075       | 0.0365  |
| FBgn0011648 | 859.139             | 6.128          | 0.022       | 0.0031  |
| FBgn0045862 | 26.013              | 2.881          | 0.160       | 0.0787  |
| FBgn0039617 | 23.546              | 7.004          | 1.042       | 0.9437  |
| FBgn0034062 | 749.261             | 19.577         | 0.256       | 0.0373  |
| FBgn0039344 | 60.946              | 6.028          | 0.298       | 0.0673  |
| FBgn0030458 | 77.938              | 7.125          | 0.326       | 0.0860  |
| FBgn0034151 | 9.574               | 1.798          | 0.169       | 0.1758  |
| FBgn0039705 | 841.222             | 9.664          | 0.056       | 0.0022  |
| FBgn0035875 | 14.132              | 3.743          | 0.496       | 0.3745  |
| FBgn0052485 | 48.950              | 3.196          | 0.104       | 0.0421  |
| FBgn0035674 | 26.938              | 2.904          | 0.156       | 0.0499  |
| FBgn0032340 | 27.384              | 4.422          | 0.357       | 0.1776  |
| FBgn0032881 | 190.445             | 5.924          | 0.092       | 0.0175  |
| FBgn0030844 | 784.078             | 30.826         | 0.606       | 0.3859  |
| FBgn0028507 | 14.868              | 1.479          | 0.074       | 0.0780  |
| FBgn0036058 | 708.937             | 14.451         | 0.147       | 0.0143  |
| FBgn0039734 | 18.067              | 2.250          | 0.140       | 0.0954  |
| FBgn0034542 | 11.896              | 1.781          | 0.133       | 0.1095  |
| FBgn0037429 | 689.830             | 14.362         | 0.149       | 0.0115  |
| FBgn0052487 | 17.763              | 2.862          | 0.231       | 0.1139  |
| FBgn0052736 | 25.484              | 3.919          | 0.301       | 0.1246  |
| FBgn0035107 | 9.183               | 2.798          | 0.426       | 0.3937  |
| FBgn0034485 | 753.287             | 16.065         | 0.171       | 0.0352  |
| FBgn0035089 | 28.967              | 5.305          | 0.486       | 0.2491  |
| FBgn0038142 | 24.580              | 6.159          | 0.772       | 0.6720  |
| FBgn0010747 | 8.435               | 1.066          | 0.067       | 0.1114  |
| FBgn0003044 | 463.504             | 18.785         | 0.381       | 0.1191  |
| FBgn0003138 | 71.015              | 7.752          | 0.423       | 0.1850  |
| FBgn0040914 | 27.745              | 5.093          | 0.467       | 0.2620  |
| FBgn0039862 | 21.096              | 2.638          | 0.165       | 0.0783  |
| FBgn0038536 | 20.371              | 4.187          | 0.430       | 0.2360  |
| FBgn0032404 | 741.196             | 11.263         | 0.086       | 0.0178  |
| FBgn0027343 | 80.272              | 6.427          | 0.257       | 0.0399  |
| FBgn0045823 | 662.348             | 22.604         | 0.386       | 0.1304  |
| FBgn0040364 | 829.391             | 10.979         | 0.073       | 0.0013  |
| FBgn0033020 | 14.102              | 3.672          | 0.478       | 0.3690  |
| FBgn0032948 | 148.291             | 8.316          | 0.233       | 0.0367  |

|             |         |        |       |        |
|-------------|---------|--------|-------|--------|
| FBgn0038834 | 115.561 | 7.174  | 0.223 | 0.0293 |
| FBgn0035852 | 10.589  | 2.364  | 0.264 | 0.2302 |
| FBgn0004034 | 39.696  | 9.465  | 1.128 | 0.8196 |
| FBgn0003141 | 843.242 | 18.026 | 0.193 | 0.0153 |
| FBgn0003076 | 817.296 | 16.096 | 0.159 | 0.0081 |
| FBgn0026573 | 727.417 | 18.675 | 0.240 | 0.0306 |
| FBgn0038607 | 16.851  | 3.439  | 0.351 | 0.2196 |
| FBgn0038084 | 668.396 | 14.452 | 0.156 | 0.0158 |
| FBgn0029657 | 656.477 | 25.455 | 0.493 | 0.2371 |
| FBgn0035670 | 31.741  | 3.760  | 0.223 | 0.0746 |
| FBgn0039403 | 29.733  | 5.398  | 0.490 | 0.2643 |
| FBgn0031111 | 15.776  | 3.291  | 0.343 | 0.2293 |
| FBgn0010225 | 713.920 | 25.022 | 0.439 | 0.1743 |
| FBgn0036126 | 22.834  | 2.398  | 0.126 | 0.0534 |
| FBgn0030913 | 110.437 | 5.843  | 0.155 | 0.0184 |
| FBgn0030096 | 67.216  | 3.329  | 0.082 | 0.0179 |
| FBgn0000303 | 634.747 | 18.594 | 0.272 | 0.0513 |
| FBgn0036800 | 18.811  | 2.844  | 0.215 | 0.1426 |
| FBgn0052675 | 155.626 | 8.659  | 0.241 | 0.0334 |
| FBgn0034861 | 217.577 | 11.711 | 0.315 | 0.0749 |
| FBgn0010501 | 32.411  | 1.958  | 0.059 | 0.0142 |
| FBgn0039401 | 20.102  | 2.340  | 0.136 | 0.0825 |
| FBgn0032123 | 25.198  | 3.163  | 0.199 | 0.0884 |
| FBgn0033097 | 10.622  | 2.143  | 0.216 | 0.1989 |
| FBgn0029996 | 54.321  | 4.525  | 0.188 | 0.0227 |
| FBgn0038312 | 19.243  | 3.273  | 0.278 | 0.1251 |
| FBgn0033814 | 128.109 | 6.227  | 0.151 | 0.0189 |
| FBgn0003480 | 22.659  | 3.407  | 0.256 | 0.1326 |
| FBgn0015618 | 616.320 | 13.332 | 0.144 | 0.0249 |
| FBgn0035331 | 799.480 | 17.027 | 0.181 | 0.0143 |
| FBgn0034903 | 86.994  | 4.969  | 0.142 | 0.0177 |
| FBgn0035083 | 8.294   | 1.681  | 0.170 | 0.1861 |
| FBgn0039084 | 25.586  | 1.652  | 0.053 | 0.0245 |
| FBgn0015610 | 20.675  | 1.437  | 0.050 | 0.0288 |
| FBgn0050159 | 15.998  | 2.361  | 0.174 | 0.1353 |
| FBgn0035038 | 40.765  | 2.249  | 0.062 | 0.0186 |
| FBgn0038860 | 23.602  | 4.342  | 0.399 | 0.2035 |
| FBgn0039514 | 22.612  | 4.016  | 0.357 | 0.1504 |
| FBgn0037711 | 21.965  | 3.463  | 0.273 | 0.1403 |
| FBgn0003254 | 799.639 | 13.325 | 0.111 | 0.0027 |
| FBgn0037219 | 18.015  | 2.757  | 0.211 | 0.1014 |
| FBgn0020236 | 136.898 | 5.573  | 0.113 | 0.0091 |
| FBgn0036004 | 12.009  | 2.249  | 0.211 | 0.1593 |
| FBgn0040348 | 33.289  | 2.982  | 0.134 | 0.0445 |
| FBgn0033257 | 6.816   | 1.428  | 0.150 | 0.2077 |
| FBgn0027094 | 27.331  | 2.417  | 0.107 | 0.0470 |
| FBgn0030101 | 31.860  | 3.581  | 0.201 | 0.0677 |
| FBgn0034618 | 810.033 | 13.217 | 0.108 | 0.0022 |
| FBgn0031952 | 136.592 | 5.541  | 0.112 | 0.0061 |
| FBgn0022338 | 35.627  | 4.506  | 0.285 | 0.0767 |
| FBgn0027538 | 780.445 | 11.848 | 0.090 | 0.0037 |
| FBgn0030893 | 55.638  | 6.298  | 0.357 | 0.1076 |
| FBgn0041706 | 7.279   | 2.640  | 0.479 | 0.4818 |
| FBgn0031643 | 686.612 | 10.954 | 0.087 | 0.0150 |

|             |         |        |       |        |
|-------------|---------|--------|-------|--------|
| FBgn0032036 | 464.953 | 13.366 | 0.192 | 0.0281 |
| FBgn0024196 | 27.457  | 4.385  | 0.350 | 0.1341 |
| FBgn0030234 | 33.518  | 4.277  | 0.273 | 0.0914 |
| FBgn0032189 | 37.703  | 2.945  | 0.115 | 0.0357 |
| FBgn0033475 | 23.268  | 2.889  | 0.179 | 0.0859 |
| FBgn0037832 | 42.172  | 4.672  | 0.259 | 0.0626 |
| FBgn0004493 | 762.463 | 11.256 | 0.083 | 0.0027 |
| FBgn0034258 | 736.346 | 21.199 | 0.305 | 0.0634 |
| FBgn0024986 | 31.534  | 2.361  | 0.088 | 0.0374 |
| FBgn0037981 | 54.715  | 4.523  | 0.187 | 0.0331 |
| FBgn0035563 | 32.591  | 8.017  | 0.986 | 0.9791 |
| FBgn0031864 | 664.870 | 13.046 | 0.128 | 0.0046 |
| FBgn0004049 | 37.418  | 3.055  | 0.125 | 0.0344 |
| FBgn0039427 | 724.513 | 16.556 | 0.189 | 0.0173 |
| FBgn0033103 | 32.288  | 8.958  | 1.243 | 0.6844 |
| FBgn0031493 | 786.535 | 10.889 | 0.075 | 0.0023 |
| FBgn0020909 | 661.634 | 13.689 | 0.142 | 0.0279 |
| FBgn0031529 | 61.123  | 6.673  | 0.364 | 0.1115 |
| FBgn0036365 | 48.028  | 2.520  | 0.066 | 0.0225 |
| FBgn0011774 | 80.351  | 5.627  | 0.197 | 0.0501 |
| FBgn0036044 | 51.275  | 3.850  | 0.145 | 0.0208 |
| FBgn0036338 | 9.407   | 2.532  | 0.341 | 0.2848 |
| FBgn0052108 | 32.057  | 3.246  | 0.164 | 0.0380 |
| FBgn0035238 | 727.057 | 24.371 | 0.408 | 0.1445 |
| FBgn0033982 | 760.182 | 16.783 | 0.185 | 0.0179 |
| FBgn0038672 | 771.332 | 16.256 | 0.171 | 0.0558 |
| FBgn0030050 | 10.147  | 3.053  | 0.459 | 0.3873 |
| FBgn0039182 | 21.363  | 3.121  | 0.228 | 0.1162 |
| FBgn0015270 | 11.722  | 1.993  | 0.169 | 0.1455 |
| FBgn0039758 | 759.899 | 18.531 | 0.226 | 0.0375 |
| FBgn0031991 | 144.033 | 4.835  | 0.081 | 0.0032 |
| FBgn0037831 | 879.379 | 11.766 | 0.079 | 0.0019 |
| FBgn0030997 | 18.364  | 3.041  | 0.252 | 0.1191 |
| FBgn0005695 | 10.904  | 2.180  | 0.218 | 0.1647 |
| FBgn0002626 | 14.629  | 2.532  | 0.219 | 0.1600 |
| FBgn0051457 | 538.847 | 22.460 | 0.468 | 0.2167 |
| FBgn0038751 | 18.928  | 3.307  | 0.289 | 0.1749 |
| FBgn0004618 | 706.746 | 15.022 | 0.160 | 0.0083 |
| FBgn0028516 | 101.619 | 6.420  | 0.203 | 0.0232 |
| FBgn0033812 | 571.054 | 13.551 | 0.161 | 0.0179 |
| FBgn0003319 | 790.727 | 13.670 | 0.118 | 0.0131 |
| FBgn0025627 | 6.017   | 3.330  | 0.921 | 0.9211 |
| FBgn0032377 | 17.791  | 2.809  | 0.222 | 0.1120 |
| FBgn0025712 | 807.746 | 11.400 | 0.080 | 0.0118 |
| FBgn0033058 | 49.965  | 2.684  | 0.072 | 0.0128 |
| FBgn0035976 | 731.139 | 28.927 | 0.572 | 0.3382 |
| FBgn0032000 | 40.776  | 1.355  | 0.023 | 0.0110 |
| FBgn0004573 | 70.166  | 8.172  | 0.476 | 0.2403 |
| FBgn0000142 | 746.168 | 20.677 | 0.286 | 0.0525 |
| FBgn0031913 | 792.552 | 17.658 | 0.197 | 0.0190 |
| FBgn0015278 | 11.359  | 2.479  | 0.270 | 0.2402 |
| FBgn0029006 | 779.348 | 13.396 | 0.115 | 0.0220 |
| FBgn0039688 | 9.703   | 1.760  | 0.160 | 0.1779 |
| FBgn0027049 | 5.186   | 1.393  | 0.187 | 0.2632 |

|             |         |        |       |        |
|-------------|---------|--------|-------|--------|
| FBgn0030900 | 657.021 | 26.468 | 0.533 | 0.2864 |
| FBgn0039732 | 874.113 | 12.557 | 0.090 | 0.0018 |
| FBgn0035140 | 674.539 | 33.149 | 0.815 | 0.7104 |
| FBgn0038259 | 40.687  | 2.052  | 0.052 | 0.0211 |
| FBgn0025117 | 29.713  | 2.157  | 0.078 | 0.0363 |
| FBgn0050149 | 123.963 | 4.460  | 0.080 | 0.0131 |
| FBgn0034191 | 843.058 | 9.944  | 0.059 | 0.0028 |
| FBgn0036196 | 760.381 | 10.876 | 0.078 | 0.0060 |
| FBgn0038872 | 37.848  | 3.741  | 0.185 | 0.0338 |
| FBgn0035707 | 21.852  | 2.461  | 0.139 | 0.0751 |
| FBgn0052699 | 742.246 | 17.751 | 0.212 | 0.0306 |
| FBgn0035797 | 30.508  | 5.704  | 0.533 | 0.3127 |
| FBgn0038484 | 18.898  | 3.490  | 0.322 | 0.1634 |
| FBgn0036286 | 16.543  | 2.045  | 0.126 | 0.0777 |
| FBgn0020493 | 23.556  | 1.522  | 0.049 | 0.0250 |
| FBgn0038183 | 28.601  | 4.198  | 0.308 | 0.1363 |
| FBgn0033673 | 28.462  | 3.465  | 0.211 | 0.0727 |
| FBgn0034224 | 34.611  | 4.722  | 0.322 | 0.1055 |
| FBgn0033464 | 334.383 | 12.689 | 0.241 | 0.0310 |
| FBgn0038811 | 16.470  | 2.086  | 0.132 | 0.0994 |
| FBgn0035381 | 81.736  | 4.157  | 0.106 | 0.0100 |
| FBgn0035287 | 9.823   | 2.550  | 0.331 | 0.2744 |
| FBgn0029838 | 16.323  | 3.560  | 0.388 | 0.2671 |
| FBgn0028331 | 699.298 | 5.983  | 0.026 | 0.0014 |
| FBgn0030955 | 30.959  | 4.314  | 0.301 | 0.0854 |
| FBgn0035870 | 469.423 | 15.406 | 0.253 | 0.0360 |
| FBgn0035343 | 150.886 | 13.056 | 0.565 | 0.3768 |
| FBgn0033583 | 6.207   | 1.508  | 0.183 | 0.2366 |
| FBgn0003321 | 591.566 | 16.086 | 0.219 | 0.0499 |
| FBgn0037217 | 10.206  | 3.440  | 0.580 | 0.4856 |
| FBgn0003312 | 826.281 | 14.243 | 0.123 | 0.0038 |
| FBgn0001145 | 778.030 | 12.043 | 0.093 | 0.0022 |
| FBgn0037502 | 51.718  | 6.036  | 0.352 | 0.1227 |
| FBgn0023511 | 17.183  | 2.546  | 0.189 | 0.1151 |
| FBgn0052687 | 704.827 | 13.386 | 0.127 | 0.0193 |
| FBgn0038818 | 146.802 | 4.414  | 0.066 | 0.0034 |
| FBgn0033902 | 778.427 | 11.511 | 0.085 | 0.0012 |
| FBgn0028648 | 68.973  | 8.050  | 0.470 | 0.2128 |
| FBgn0001226 | 86.787  | 8.733  | 0.439 | 0.1783 |
| FBgn0038426 | 20.147  | 2.180  | 0.118 | 0.0707 |
| FBgn0026664 | 16.355  | 2.074  | 0.131 | 0.0797 |
| FBgn0025702 | 46.027  | 5.502  | 0.329 | 0.1128 |
| FBgn0040236 | 789.693 | 17.472 | 0.193 | 0.0473 |
| FBgn0038638 | 12.882  | 1.516  | 0.089 | 0.0713 |
| FBgn0015336 | 5.426   | 1.902  | 0.333 | 0.3892 |
| FBgn0001255 | 64.433  | 4.398  | 0.150 | 0.0223 |
| FBgn0031191 | 25.570  | 4.359  | 0.371 | 0.1746 |
| FBgn0000562 | 70.284  | 4.326  | 0.133 | 0.0256 |
| FBgn0038980 | 704.219 | 37.050 | 0.975 | 0.9611 |
| FBgn0039623 | 11.412  | 2.901  | 0.369 | 0.2972 |
| FBgn0027549 | 42.453  | 2.734  | 0.088 | 0.0186 |
| FBgn0030778 | 5.013   | 0.853  | 0.073 | 0.1415 |
| FBgn0025592 | 14.513  | 2.335  | 0.188 | 0.1355 |
| FBgn0035189 | 15.451  | 1.710  | 0.095 | 0.0720 |

|             |         |        |       |        |
|-------------|---------|--------|-------|--------|
| FBgn0033772 | 824.846 | 11.354 | 0.078 | 0.0112 |
| FBgn0028622 | 704.645 | 19.750 | 0.277 | 0.0475 |
| FBgn0035798 | 4.437   | 2.228  | 0.559 | 0.6076 |
| FBgn0040079 | 44.840  | 3.045  | 0.103 | 0.0284 |
| FBgn0036317 | 9.575   | 1.666  | 0.145 | 0.1697 |
| FBgn0052100 | 17.317  | 5.171  | 0.772 | 0.6821 |
| FBgn0000228 | 877.256 | 14.754 | 0.124 | 0.0035 |
| FBgn0025833 | 7.897   | 1.796  | 0.204 | 0.2236 |
| FBgn0028743 | 696.819 | 15.714 | 0.177 | 0.0456 |
| FBgn0031698 | 812.676 | 14.840 | 0.135 | 0.0048 |
| FBgn0035041 | 7.663   | 3.117  | 0.634 | 0.5912 |
| FBgn0030990 | 32.190  | 1.930  | 0.058 | 0.0166 |
| FBgn0036410 | 675.748 | 21.684 | 0.348 | 0.1291 |
| FBgn0037220 | 26.480  | 2.517  | 0.120 | 0.0400 |
| FBgn0030631 | 30.369  | 6.099  | 0.613 | 0.4413 |
| FBgn0039019 | 53.205  | 3.675  | 0.127 | 0.0231 |
| FBgn0050423 | 713.897 | 22.574 | 0.357 | 0.1276 |
| FBgn0024273 | 99.546  | 4.588  | 0.106 | 0.0150 |
| FBgn0030718 | 809.132 | 17.729 | 0.194 | 0.0166 |
| FBgn0005648 | 8.842   | 1.686  | 0.161 | 0.1903 |
| FBgn0003520 | 5.430   | 1.972  | 0.358 | 0.4098 |
| FBgn0051666 | 106.204 | 7.798  | 0.286 | 0.0598 |
| FBgn0032803 | 159.533 | 4.987  | 0.078 | 0.0063 |
| FBgn0029801 | 35.441  | 2.686  | 0.102 | 0.0295 |
| FBgn0028961 | 70.281  | 6.408  | 0.292 | 0.0643 |
| FBgn0031959 | 764.537 | 15.175 | 0.151 | 0.0540 |
| FBgn0002887 | 47.992  | 2.873  | 0.086 | 0.0150 |
| FBgn0037638 | 39.472  | 2.812  | 0.100 | 0.0295 |
| FBgn0035504 | 613.453 | 18.423 | 0.277 | 0.0588 |
| FBgn0023181 | 3.519   | 1.889  | 0.507 | 0.5946 |
| FBgn0033850 | 14.072  | 2.590  | 0.238 | 0.1516 |
| FBgn0028582 | 708.676 | 12.820 | 0.116 | 0.0446 |
| FBgn0003598 | 13.801  | 1.855  | 0.125 | 0.0841 |
| FBgn0004465 | 769.241 | 13.144 | 0.112 | 0.0042 |
| FBgn0034025 | 23.527  | 1.502  | 0.048 | 0.0357 |
| FBgn0027548 | 39.555  | 2.264  | 0.065 | 0.0165 |
| FBgn0015625 | 23.998  | 2.558  | 0.136 | 0.0722 |
| FBgn0023496 | 36.751  | 5.018  | 0.343 | 0.1204 |
| FBgn0036485 | 64.797  | 4.992  | 0.192 | 0.0213 |
| FBgn0031010 | 777.523 | 10.757 | 0.074 | 0.0043 |
| FBgn0032216 | 27.013  | 2.976  | 0.164 | 0.0662 |
| FBgn0039193 | 16.185  | 3.737  | 0.431 | 0.2629 |
| FBgn0029769 | 21.990  | 5.715  | 0.743 | 0.6158 |
| FBgn0035989 | 18.834  | 4.200  | 0.468 | 0.3086 |
| FBgn0032870 | 833.316 | 16.114 | 0.156 | 0.0075 |
| FBgn0040763 | 5.068   | 2.011  | 0.399 | 0.4584 |
| FBgn0030788 | 669.641 | 31.367 | 0.735 | 0.5818 |
| FBgn0026439 | 28.623  | 4.179  | 0.305 | 0.0970 |
| FBgn0039864 | 97.088  | 6.098  | 0.191 | 0.0213 |
| FBgn0034577 | 827.791 | 7.027  | 0.030 | 0.0032 |
| FBgn0030839 | 26.974  | 3.692  | 0.253 | 0.0875 |
| FBgn0027360 | 14.796  | 3.691  | 0.460 | 0.3072 |
| FBgn0029503 | 799.964 | 17.148 | 0.184 | 0.0138 |
| FBgn0051974 | 27.177  | 4.273  | 0.336 | 0.1670 |

|             |         |        |       |        |
|-------------|---------|--------|-------|--------|
| FBgn0034498 | 718.583 | 17.162 | 0.205 | 0.0187 |
| FBgn0034554 | 12.043  | 2.589  | 0.278 | 0.2084 |
| FBgn0050371 | 135.748 | 7.566  | 0.211 | 0.0430 |
| FBgn0030056 | 18.226  | 2.181  | 0.131 | 0.0963 |
| FBgn0029915 | 35.456  | 5.267  | 0.391 | 0.1886 |
| FBgn0035001 | 40.752  | 2.941  | 0.106 | 0.0415 |
| FBgn0031174 | 710.063 | 19.733 | 0.274 | 0.0849 |
| FBgn0037678 | 30.626  | 3.632  | 0.215 | 0.0855 |
| FBgn0040211 | 20.290  | 2.448  | 0.148 | 0.0837 |
| FBgn0030058 | 30.431  | 2.822  | 0.131 | 0.0308 |
| FBgn0013972 | 21.483  | 3.078  | 0.220 | 0.0849 |
| FBgn0034695 | 663.783 | 20.630 | 0.321 | 0.0731 |
| FBgn0026585 | 10.873  | 2.182  | 0.219 | 0.1916 |
| FBgn0039682 | 42.024  | 3.880  | 0.179 | 0.0431 |
| FBgn0039111 | 23.298  | 2.595  | 0.144 | 0.0555 |
| FBgn0030884 | 25.692  | 2.611  | 0.133 | 0.0624 |
| FBgn0034792 | 838.341 | 8.058  | 0.039 | 0.0030 |
| FBgn0035236 | 750.048 | 23.444 | 0.366 | 0.1069 |
| FBgn0020545 | 15.676  | 2.258  | 0.163 | 0.1098 |
| FBgn0024920 | 25.589  | 2.690  | 0.141 | 0.0492 |
| FBgn0036462 | 867.318 | 7.407  | 0.032 | 0.0023 |
| FBgn0042710 | 832.495 | 12.811 | 0.099 | 0.0023 |
| FBgn0036153 | 21.043  | 4.697  | 0.524 | 0.3462 |
| FBgn0031216 | 8.614   | 3.319  | 0.640 | 0.6061 |
| FBgn0029708 | 18.804  | 3.560  | 0.337 | 0.1720 |
| FBgn0033810 | 831.214 | 9.897  | 0.059 | 0.0005 |
| FBgn0033189 | 25.295  | 3.424  | 0.232 | 0.0705 |
| FBgn0037980 | 743.805 | 17.604 | 0.208 | 0.0364 |
| FBgn0003028 | 623.060 | 21.978 | 0.388 | 0.1248 |
| FBgn0051636 | 31.335  | 1.417  | 0.032 | 0.0182 |
| FBgn0026389 | 699.965 | 17.683 | 0.223 | 0.0345 |
| FBgn0032446 | 761.359 | 22.436 | 0.331 | 0.0801 |
| FBgn0033807 | 195.425 | 7.243  | 0.134 | 0.0107 |
| FBgn0035235 | 114.776 | 7.545  | 0.248 | 0.0351 |
| FBgn0032031 | 798.994 | 17.661 | 0.195 | 0.0157 |
| FBgn0032172 | 55.298  | 3.400  | 0.105 | 0.0298 |
| FBgn0038805 | 691.390 | 21.941 | 0.348 | 0.0930 |
| FBgn0032465 | 748.516 | 16.019 | 0.171 | 0.0291 |
| FBgn0010812 | 16.366  | 2.096  | 0.134 | 0.0876 |
| FBgn0034718 | 672.078 | 13.415 | 0.134 | 0.0068 |
| FBgn0032002 | 32.306  | 4.404  | 0.300 | 0.0848 |
| FBgn0031417 | 15.114  | 3.340  | 0.369 | 0.2714 |
| FBgn0028837 | 64.589  | 5.124  | 0.203 | 0.0287 |
| FBgn0035604 | 55.618  | 3.222  | 0.093 | 0.0116 |
| FBgn0053191 | 19.078  | 2.009  | 0.106 | 0.0835 |
| FBgn0036336 | 79.752  | 3.889  | 0.095 | 0.0080 |
| FBgn0033188 | 601.900 | 22.979 | 0.439 | 0.2141 |
| FBgn0035037 | 22.345  | 4.337  | 0.421 | 0.2092 |
| FBgn0038639 | 4.172   | 2.250  | 0.607 | 0.6695 |
| FBgn0021800 | 29.752  | 2.192  | 0.081 | 0.0261 |
| FBgn0030160 | 600.744 | 33.295 | 0.923 | 0.8814 |
| FBgn0032079 | 767.434 | 18.405 | 0.221 | 0.0786 |
| FBgn0032379 | 635.056 | 9.740  | 0.075 | 0.0031 |
| FBgn0041588 | 876.929 | 6.432  | 0.024 | 0.0035 |

|             |         |        |       |        |
|-------------|---------|--------|-------|--------|
| FBgn0038432 | 207.089 | 3.113  | 0.023 | 0.0013 |
| FBgn0027836 | 5.931   | 2.308  | 0.449 | 0.4882 |
| FBgn0026379 | 31.942  | 1.837  | 0.053 | 0.0147 |
| FBgn0032127 | 704.416 | 19.293 | 0.264 | 0.0794 |
| FBgn0030562 | 44.937  | 5.935  | 0.392 | 0.1529 |
| FBgn0023529 | 26.268  | 3.830  | 0.279 | 0.0911 |
| FBgn0031228 | 624.422 | 28.288 | 0.641 | 0.4371 |
| FBgn0032401 | 16.037  | 1.912  | 0.114 | 0.1009 |
| FBgn0030026 | 12.710  | 1.047  | 0.043 | 0.0457 |
| FBgn0040369 | 25.100  | 3.134  | 0.196 | 0.0633 |
| FBgn0036035 | 50.318  | 3.821  | 0.145 | 0.0456 |
| FBgn0034288 | 13.949  | 7.633  | 2.088 | 0.1519 |
| FBgn0036258 | 101.251 | 5.614  | 0.156 | 0.0115 |
| FBgn0003720 | 40.919  | 6.598  | 0.532 | 0.3128 |
| FBgn0037539 | 625.876 | 24.230 | 0.469 | 0.2080 |
| FBgn0027087 | 10.421  | 2.383  | 0.272 | 0.2377 |
| FBgn0003525 | 630.726 | 8.023  | 0.051 | 0.0090 |
| FBgn0035289 | 13.004  | 2.093  | 0.168 | 0.1347 |
| FBgn0039280 | 16.091  | 2.096  | 0.137 | 0.0956 |
| FBgn0031739 | 44.232  | 5.323  | 0.320 | 0.0830 |
| FBgn0034670 | 698.242 | 19.054 | 0.260 | 0.0486 |
| FBgn0035192 | 20.083  | 3.298  | 0.271 | 0.1217 |
| FBgn0037705 | 754.388 | 18.589 | 0.229 | 0.0262 |
| FBgn0002772 | 729.398 | 24.953 | 0.427 | 0.1630 |
| FBgn0035246 | 8.463   | 3.022  | 0.539 | 0.4884 |
| FBgn0035008 | 105.035 | 8.341  | 0.331 | 0.1015 |
| FBgn0035091 | 770.029 | 15.121 | 0.148 | 0.0066 |
| FBgn0032003 | 620.581 | 9.117  | 0.067 | 0.0066 |
| FBgn0030895 | 6.537   | 1.076  | 0.089 | 0.1425 |
| FBgn0036846 | 645.122 | 24.393 | 0.461 | 0.1990 |
| FBgn0032493 | 12.751  | 2.017  | 0.160 | 0.1411 |
| FBgn0027296 | 91.523  | 2.791  | 0.043 | 0.0087 |
| FBgn0002781 | 122.223 | 8.318  | 0.283 | 0.0514 |
| FBgn0015925 | 751.696 | 11.182 | 0.083 | 0.0067 |
| FBgn0036915 | 38.617  | 2.670  | 0.092 | 0.0335 |
| FBgn0025286 | 14.486  | 1.612  | 0.090 | 0.0842 |
| FBgn0036955 | 42.170  | 3.767  | 0.168 | 0.0296 |
| FBgn0003527 | 765.058 | 10.404 | 0.071 | 0.0029 |
| FBgn0030847 | 22.009  | 4.091  | 0.380 | 0.1837 |
| FBgn0034858 | 12.895  | 2.095  | 0.170 | 0.1392 |
| FBgn0038532 | 804.826 | 19.235 | 0.230 | 0.0268 |
| FBgn0025820 | 24.472  | 2.180  | 0.097 | 0.0585 |
| FBgn0032723 | 25.965  | 3.615  | 0.252 | 0.1141 |
| FBgn0035679 | 22.342  | 2.442  | 0.134 | 0.0665 |
| FBgn0050405 | 13.012  | 5.086  | 0.994 | 0.9921 |
| FBgn0028695 | 19.257  | 1.574  | 0.064 | 0.0397 |
| FBgn0015282 | 790.429 | 11.083 | 0.078 | 0.0089 |
| FBgn0002031 | 662.976 | 14.309 | 0.154 | 0.0547 |
| FBgn0002578 | 591.379 | 17.459 | 0.258 | 0.0382 |
| FBgn0034694 | 19.986  | 3.116  | 0.243 | 0.1438 |
| FBgn0040077 | 728.431 | 10.490 | 0.076 | 0.0213 |
| FBgn0030397 | 58.345  | 5.329  | 0.243 | 0.0397 |
| FBgn0014343 | 28.963  | 5.214  | 0.469 | 0.2604 |
| FBgn0015527 | 10.040  | 2.906  | 0.420 | 0.3858 |

|             |         |        |       |        |
|-------------|---------|--------|-------|--------|
| FBgn0050080 | 25.006  | 3.514  | 0.247 | 0.0917 |
| FBgn0036361 | 52.366  | 6.411  | 0.392 | 0.1454 |
| FBgn0032514 | 39.573  | 4.212  | 0.224 | 0.0571 |
| FBgn0010851 | 51.153  | 3.889  | 0.148 | 0.0161 |
| FBgn0030859 | 35.244  | 3.910  | 0.217 | 0.0877 |
| FBgn0039186 | 696.635 | 17.770 | 0.227 | 0.0366 |
| FBgn0034388 | 35.769  | 5.461  | 0.417 | 0.1769 |
| FBgn0011284 | 25.900  | 3.283  | 0.208 | 0.0947 |
| FBgn0038146 | 22.111  | 3.430  | 0.266 | 0.0985 |
| FBgn0011659 | 161.394 | 8.743  | 0.237 | 0.0306 |
| FBgn0001291 | 17.564  | 2.975  | 0.252 | 0.1577 |
| FBgn0037094 | 601.206 | 18.808 | 0.294 | 0.0569 |
| FBgn0038499 | 747.567 | 13.962 | 0.130 | 0.0090 |
| FBgn0033364 | 95.691  | 5.583  | 0.163 | 0.0178 |
| FBgn0051006 | 746.022 | 15.889 | 0.169 | 0.0582 |
| FBgn0025558 | 853.216 | 17.333 | 0.176 | 0.0115 |
| FBgn0050384 | 16.904  | 3.474  | 0.357 | 0.2399 |
| FBgn0050339 | 15.354  | 3.525  | 0.405 | 0.2455 |
| FBgn0031533 | 199.333 | 5.124  | 0.066 | 0.0055 |
| FBgn0039665 | 3.281   | 1.540  | 0.362 | 0.4687 |
| FBgn0019890 | 704.459 | 12.091 | 0.104 | 0.0172 |
| FBgn0038272 | 184.676 | 5.383  | 0.078 | 0.0086 |
| FBgn0033136 | 41.715  | 4.700  | 0.265 | 0.0714 |
| FBgn0004606 | 43.578  | 4.368  | 0.219 | 0.0478 |
| FBgn0036489 | 22.237  | 3.489  | 0.274 | 0.1509 |
| FBgn0029093 | 106.326 | 6.508  | 0.199 | 0.0192 |
| FBgn0035950 | 21.006  | 3.836  | 0.350 | 0.1950 |
| FBgn0017550 | 23.942  | 3.118  | 0.203 | 0.0914 |
| FBgn0039447 | 41.092  | 8.766  | 0.935 | 0.9041 |
| FBgn0036953 | 16.592  | 1.367  | 0.056 | 0.0392 |
| FBgn0023179 | 787.956 | 16.523 | 0.173 | 0.0294 |
| FBgn0031310 | 10.283  | 1.748  | 0.149 | 0.1526 |
| FBgn0036159 | 50.331  | 3.661  | 0.133 | 0.0197 |
| FBgn0039538 | 18.490  | 3.448  | 0.322 | 0.1966 |
| FBgn0029999 | 44.390  | 3.551  | 0.142 | 0.0287 |
| FBgn0039287 | 35.935  | 2.924  | 0.119 | 0.0355 |
| FBgn0036801 | 90.783  | 6.295  | 0.218 | 0.0358 |
| FBgn0031057 | 20.981  | 1.867  | 0.083 | 0.0549 |
| FBgn0014023 | 774.639 | 17.651 | 0.201 | 0.0170 |
| FBgn0033244 | 70.486  | 3.389  | 0.081 | 0.0144 |
| FBgn0039304 | 7.139   | 2.312  | 0.374 | 0.3798 |
| FBgn0039257 | 8.133   | 3.553  | 0.776 | 0.7452 |
| FBgn0039288 | 16.875  | 5.654  | 0.947 | 0.9267 |
| FBgn0050217 | 25.664  | 3.270  | 0.208 | 0.1018 |
| FBgn0037758 | 18.663  | 2.953  | 0.234 | 0.1169 |
| FBgn0038903 | 789.671 | 17.906 | 0.203 | 0.0181 |
| FBgn0040356 | 9.180   | 2.357  | 0.303 | 0.2660 |
| FBgn0036925 | 15.336  | 4.771  | 0.742 | 0.6385 |
| FBgn0039625 | 23.154  | 3.201  | 0.221 | 0.0895 |
| FBgn0029504 | 5.607   | 2.421  | 0.523 | 0.5533 |
| FBgn0052428 | 698.351 | 19.800 | 0.281 | 0.0579 |
| FBgn0038321 | 35.913  | 4.478  | 0.279 | 0.1289 |
| FBgn0000250 | 19.977  | 2.365  | 0.140 | 0.0686 |
| FBgn0035817 | 29.303  | 2.036  | 0.071 | 0.0245 |



|             |         |        |       |        |
|-------------|---------|--------|-------|--------|
| FBgn0032819 | 15.458  | 3.195  | 0.330 | 0.1826 |
| FBgn0034137 | 819.270 | 24.439 | 0.365 | 0.1057 |
| FBgn0029839 | 583.058 | 16.414 | 0.231 | 0.0285 |
| FBgn0038958 | 23.720  | 3.499  | 0.258 | 0.1205 |
| FBgn0039294 | 31.591  | 3.945  | 0.246 | 0.0630 |
| FBgn0033132 | 18.649  | 1.664  | 0.074 | 0.0586 |
| FBgn0035741 | 16.123  | 3.384  | 0.355 | 0.1996 |
| FBgn0050404 | 18.227  | 2.447  | 0.164 | 0.0769 |
| FBgn0004556 | 772.122 | 14.060 | 0.128 | 0.0140 |
| FBgn0035945 | 631.737 | 15.313 | 0.186 | 0.0157 |
| FBgn0037847 | 724.625 | 24.575 | 0.417 | 0.1529 |
| FBgn0052685 | 41.682  | 3.066  | 0.113 | 0.0334 |
| FBgn0014374 | 7.400   | 2.529  | 0.432 | 0.4093 |
| FBgn0016031 | 751.167 | 12.387 | 0.102 | 0.0254 |
| FBgn0039500 | 11.065  | 3.411  | 0.526 | 0.4165 |
| FBgn0051561 | 14.894  | 3.401  | 0.388 | 0.2407 |
| FBgn0034262 | 41.818  | 1.242  | 0.018 | 0.0112 |
| FBgn0031508 | 14.723  | 3.921  | 0.522 | 0.4045 |
| FBgn0036366 | 711.809 | 23.875 | 0.400 | 0.1372 |
| FBgn0040268 | 681.301 | 17.362 | 0.221 | 0.0273 |
| FBgn0011509 | 38.778  | 4.665  | 0.281 | 0.0725 |
| FBgn0032321 | 17.278  | 2.193  | 0.139 | 0.1035 |
| FBgn0039938 | 17.598  | 3.602  | 0.369 | 0.2288 |
| FBgn0015271 | 35.347  | 5.422  | 0.416 | 0.1805 |
| FBgn0028374 | 66.086  | 5.878  | 0.261 | 0.0550 |
| FBgn0051676 | 18.506  | 2.111  | 0.120 | 0.0656 |
| FBgn0036107 | 643.785 | 17.349 | 0.234 | 0.0424 |
| FBgn0038425 | 31.744  | 3.522  | 0.195 | 0.0419 |
| FBgn0027088 | 34.234  | 4.225  | 0.261 | 0.0820 |
| FBgn0039875 | 15.482  | 1.746  | 0.098 | 0.0948 |
| FBgn0036225 | 750.552 | 12.398 | 0.102 | 0.0053 |
| FBgn0040465 | 732.859 | 13.905 | 0.132 | 0.0188 |
| FBgn0000625 | 42.611  | 2.865  | 0.096 | 0.0363 |
| FBgn0039197 | 105.196 | 7.632  | 0.277 | 0.0581 |
| FBgn0052085 | 12.512  | 2.064  | 0.170 | 0.1357 |
| FBgn0036228 | 23.610  | 3.701  | 0.290 | 0.1430 |
| FBgn0000357 | 53.191  | 6.114  | 0.351 | 0.1032 |
| FBgn0038357 | 14.019  | 3.233  | 0.373 | 0.2939 |
| FBgn0041707 | 115.395 | 6.718  | 0.196 | 0.0185 |
| FBgn0026737 | 720.983 | 20.696 | 0.297 | 0.0654 |
| FBgn0024753 | 820.807 | 16.844 | 0.173 | 0.0108 |
| FBgn0039417 | 811.499 | 7.537  | 0.035 | 0.0069 |
| FBgn0051163 | 23.525  | 3.579  | 0.272 | 0.1439 |
| FBgn0032130 | 17.447  | 4.899  | 0.688 | 0.5689 |
| FBgn0037565 | 718.086 | 13.113 | 0.120 | 0.0063 |
| FBgn0030361 | 18.831  | 2.425  | 0.156 | 0.0654 |
| FBgn0038949 | 721.345 | 20.431 | 0.289 | 0.0540 |
| FBgn0039602 | 768.005 | 13.947 | 0.127 | 0.0469 |
| FBgn0021995 | 778.015 | 20.801 | 0.278 | 0.0481 |
| FBgn0039438 | 72.804  | 6.814  | 0.319 | 0.1487 |
| FBgn0050476 | 16.104  | 1.850  | 0.106 | 0.0910 |
| FBgn0003390 | 586.437 | 27.388 | 0.640 | 0.4349 |
| FBgn0031050 | 22.656  | 4.283  | 0.405 | 0.2302 |
| FBgn0026666 | 128.775 | 11.281 | 0.494 | 0.2384 |

|             |         |        |       |        |
|-------------|---------|--------|-------|--------|
| FBgn0052945 | 29.486  | 6.028  | 0.616 | 0.4222 |
| FBgn0016120 | 106.605 | 6.527  | 0.200 | 0.0607 |
| FBgn0039495 | 113.533 | 6.414  | 0.181 | 0.0294 |
| FBgn0030597 | 10.341  | 4.422  | 0.945 | 0.9308 |
| FBgn0032733 | 9.771   | 2.561  | 0.336 | 0.2844 |
| FBgn0027513 | 7.708   | 2.665  | 0.461 | 0.4527 |
| FBgn0027843 | 15.789  | 4.286  | 0.582 | 0.4528 |
| FBgn0037303 | 172.470 | 7.426  | 0.160 | 0.0296 |
| FBgn0023174 | 29.466  | 3.557  | 0.215 | 0.0594 |
| FBgn0037339 | 124.609 | 5.321  | 0.114 | 0.0279 |
| FBgn0031822 | 16.516  | 4.034  | 0.493 | 0.3113 |
| FBgn0034484 | 819.182 | 17.271 | 0.182 | 0.0132 |
| FBgn0036704 | 110.256 | 3.915  | 0.069 | 0.0026 |
| FBgn0011584 | 19.276  | 2.473  | 0.159 | 0.0774 |
| FBgn0026749 | 7.096   | 1.776  | 0.222 | 0.2638 |
| FBgn0051203 | 75.198  | 4.799  | 0.153 | 0.0125 |
| FBgn0035101 | 30.261  | 2.047  | 0.069 | 0.0373 |
| FBgn0041150 | 835.060 | 7.218  | 0.031 | 0.0068 |
| FBgn0053214 | 63.211  | 6.877  | 0.374 | 0.1602 |
| FBgn0030065 | 22.210  | 3.578  | 0.288 | 0.1526 |
| FBgn0050010 | 154.865 | 7.099  | 0.163 | 0.0117 |
| FBgn0000095 | 194.571 | 15.706 | 0.634 | 0.4276 |
| FBgn0031515 | 18.681  | 2.097  | 0.118 | 0.0867 |
| FBgn0029763 | 33.495  | 3.711  | 0.206 | 0.0584 |
| FBgn0035583 | 801.248 | 22.821 | 0.325 | 0.0789 |
| FBgn0023517 | 17.898  | 3.114  | 0.271 | 0.1760 |
| FBgn0037402 | 26.840  | 6.494  | 0.786 | 0.6910 |
| FBgn0039714 | 12.225  | 1.598  | 0.104 | 0.1141 |
| FBgn0026753 | 10.524  | 2.067  | 0.203 | 0.1875 |
| FBgn0028704 | 860.054 | 7.341  | 0.031 | 0.0046 |
| FBgn0037138 | 106.809 | 3.728  | 0.065 | 0.0045 |
| FBgn0035825 | 795.243 | 13.147 | 0.109 | 0.0152 |
| FBgn0003715 | 22.938  | 3.611  | 0.284 | 0.1057 |
| FBgn0039835 | 5.746   | 1.185  | 0.122 | 0.1841 |
| FBgn0051849 | 832.456 | 11.802 | 0.084 | 0.0025 |
| FBgn0035429 | 115.634 | 11.275 | 0.550 | 0.3092 |
| FBgn0001206 | 57.952  | 4.977  | 0.214 | 0.0305 |
| FBgn0031590 | 794.472 | 16.142 | 0.164 | 0.0090 |
| FBgn0038506 | 6.799   | 2.774  | 0.566 | 0.5818 |
| FBgn0031455 | 675.501 | 15.954 | 0.188 | 0.0190 |
| FBgn0035949 | 12.841  | 3.543  | 0.489 | 0.3751 |
| FBgn0044323 | 28.870  | 2.675  | 0.124 | 0.0598 |
| FBgn0029147 | 87.091  | 6.539  | 0.245 | 0.0482 |
| FBgn0038279 | 10.005  | 3.312  | 0.548 | 0.4714 |
| FBgn0021944 | 741.403 | 14.557 | 0.143 | 0.0058 |
| FBgn0036112 | 667.016 | 27.767 | 0.578 | 0.3471 |
| FBgn0026210 | 22.870  | 4.196  | 0.385 | 0.2131 |
| FBgn0005640 | 721.506 | 15.348 | 0.163 | 0.0090 |
| FBgn0028487 | 788.128 | 17.934 | 0.204 | 0.0298 |
| FBgn0036652 | 24.817  | 2.200  | 0.098 | 0.0435 |
| FBgn0036805 | 32.612  | 3.479  | 0.186 | 0.0569 |
| FBgn0013762 | 18.587  | 2.180  | 0.128 | 0.0725 |
| FBgn0038695 | 44.357  | 3.994  | 0.180 | 0.0365 |
| FBgn0035539 | 20.190  | 3.703  | 0.340 | 0.1715 |

|             |         |        |       |        |
|-------------|---------|--------|-------|--------|
| FBgn0011554 | 9.209   | 2.065  | 0.232 | 0.2310 |
| FBgn0011737 | 120.156 | 2.106  | 0.018 | 0.0014 |
| FBgn0036639 | 47.985  | 4.011  | 0.168 | 0.0449 |
| FBgn0040793 | 699.622 | 22.186 | 0.352 | 0.0956 |
| FBgn0030625 | 38.547  | 4.441  | 0.256 | 0.0577 |
| FBgn0040358 | 755.524 | 22.752 | 0.343 | 0.0886 |
| FBgn0005612 | 13.977  | 5.125  | 0.940 | 0.9175 |
| FBgn0038769 | 71.685  | 4.509  | 0.142 | 0.0118 |
| FBgn0027547 | 19.229  | 4.806  | 0.601 | 0.4280 |
| FBgn0040601 | 892.536 | 5.289  | 0.016 | 0.0002 |
| FBgn0030993 | 34.228  | 5.316  | 0.413 | 0.1736 |
| FBgn0037606 | 7.502   | 2.252  | 0.338 | 0.3642 |
| FBgn0035734 | 27.384  | 4.675  | 0.399 | 0.2005 |
| FBgn0034657 | 24.104  | 2.481  | 0.128 | 0.0715 |
| FBgn0036143 | 55.574  | 5.250  | 0.248 | 0.0534 |
| FBgn0037993 | 118.724 | 4.830  | 0.098 | 0.0102 |
| FBgn0036771 | 12.010  | 2.598  | 0.281 | 0.2193 |
| FBgn0036777 | 43.846  | 4.894  | 0.273 | 0.0944 |
| FBgn0036481 | 657.262 | 19.996 | 0.304 | 0.0667 |
| FBgn0038251 | 12.887  | 1.506  | 0.088 | 0.0821 |
| FBgn0038373 | 8.503   | 2.276  | 0.305 | 0.2844 |
| FBgn0037875 | 33.629  | 3.808  | 0.216 | 0.0831 |
| FBgn0040992 | 18.038  | 1.773  | 0.087 | 0.0747 |
| FBgn0010226 | 24.422  | 6.223  | 0.793 | 0.6919 |
| FBgn0003545 | 140.984 | 4.027  | 0.058 | 0.0058 |
| FBgn0015359 | 6.871   | 2.957  | 0.636 | 0.6231 |
| FBgn0027607 | 764.306 | 16.596 | 0.180 | 0.0359 |
| FBgn0010409 | 34.919  | 3.071  | 0.135 | 0.0621 |
| FBgn0030257 | 20.499  | 3.667  | 0.328 | 0.1633 |
| FBgn0011642 | 699.783 | 25.792 | 0.475 | 0.2151 |
| FBgn0026085 | 12.996  | 1.725  | 0.114 | 0.1015 |
| FBgn0050398 | 486.693 | 18.265 | 0.343 | 0.1632 |
| FBgn0061360 | 30.104  | 2.829  | 0.133 | 0.0472 |
| FBgn0001259 | 89.228  | 4.121  | 0.095 | 0.0169 |
| FBgn0002283 | 21.265  | 4.013  | 0.379 | 0.1799 |
| FBgn0020620 | 22.355  | 2.559  | 0.146 | 0.0535 |
| FBgn0047038 | 712.437 | 19.176 | 0.258 | 0.0517 |
| FBgn0034758 | 777.617 | 12.441 | 0.100 | 0.0024 |
| FBgn0035263 | 577.737 | 18.441 | 0.294 | 0.1251 |
| FBgn0051010 | 517.655 | 14.065 | 0.191 | 0.0273 |
| FBgn0062411 | 28.972  | 3.588  | 0.222 | 0.0704 |
| FBgn0052237 | 11.107  | 3.692  | 0.614 | 0.5216 |
| FBgn0050375 | 57.539  | 3.658  | 0.116 | 0.0258 |
| FBgn0023214 | 190.180 | 8.479  | 0.189 | 0.0154 |
| FBgn0033226 | 19.112  | 2.722  | 0.194 | 0.1333 |
| FBgn0034988 | 2.992   | 0.622  | 0.065 | 0.1518 |
| FBgn0032612 | 6.408   | 1.701  | 0.226 | 0.2803 |
| FBgn0004551 | 672.480 | 23.320 | 0.404 | 0.1400 |
| FBgn0031638 | 11.679  | 1.964  | 0.165 | 0.1558 |
| FBgn0003255 | 735.649 | 23.510 | 0.376 | 0.1149 |
| FBgn0033869 | 590.095 | 22.070 | 0.413 | 0.1578 |
| FBgn0029672 | 891.683 | 9.331  | 0.049 | 0.0025 |
| FBgn0001970 | 26.789  | 2.528  | 0.119 | 0.0355 |
| FBgn0032771 | 587.236 | 10.717 | 0.098 | 0.0090 |

|             |         |        |       |        |
|-------------|---------|--------|-------|--------|
| FBgn0035713 | 59.493  | 2.700  | 0.061 | 0.0067 |
| FBgn0013765 | 898.350 | 9.230  | 0.047 | 0.0014 |
| FBgn0035896 | 107.873 | 5.578  | 0.144 | 0.0158 |
| FBgn0031997 | 28.981  | 3.035  | 0.159 | 0.0654 |
| FBgn0030403 | 11.944  | 2.143  | 0.192 | 0.1727 |
| FBgn0003046 | 22.686  | 4.857  | 0.520 | 0.3294 |
| FBgn0021795 | 19.097  | 2.714  | 0.193 | 0.1043 |
| FBgn0039639 | 55.138  | 4.128  | 0.155 | 0.0223 |
| FBgn0030559 | 14.304  | 4.321  | 0.653 | 0.5431 |
| FBgn0039448 | 437.066 | 10.793 | 0.133 | 0.0384 |
| FBgn0031985 | 75.291  | 2.674  | 0.047 | 0.0031 |
| FBgn0038735 | 658.798 | 22.118 | 0.371 | 0.1111 |
| FBgn0035538 | 18.079  | 2.925  | 0.237 | 0.1118 |
| FBgn0037241 | 27.071  | 3.041  | 0.171 | 0.0796 |
| FBgn0030944 | 3.419   | 0.922  | 0.124 | 0.2266 |
| FBgn0038396 | 63.051  | 3.144  | 0.078 | 0.0077 |
| FBgn0038723 | 823.273 | 15.046 | 0.137 | 0.0298 |
| FBgn0035612 | 695.050 | 14.642 | 0.154 | 0.0090 |
| FBgn0034923 | 759.703 | 14.983 | 0.148 | 0.0166 |
| FBgn0028476 | 12.000  | 2.710  | 0.306 | 0.2406 |
| FBgn0000320 | 218.420 | 10.439 | 0.249 | 0.0360 |
| FBgn0034814 | 26.996  | 5.450  | 0.550 | 0.3426 |
| FBgn0029665 | 19.243  | 3.068  | 0.245 | 0.1389 |
| FBgn0035088 | 49.329  | 2.052  | 0.043 | 0.0094 |
| FBgn0050492 | 22.844  | 1.793  | 0.070 | 0.0439 |
| FBgn0037602 | 11.775  | 2.467  | 0.258 | 0.2301 |
| FBgn0043070 | 12.059  | 0.917  | 0.035 | 0.0485 |
| FBgn0039039 | 42.737  | 6.563  | 0.504 | 0.2781 |
| FBgn0011219 | 812.694 | 12.454 | 0.095 | 0.0016 |
| FBgn0052076 | 21.645  | 2.173  | 0.109 | 0.0453 |
| FBgn0027872 | 33.341  | 3.278  | 0.161 | 0.0413 |
| FBgn0033558 | 666.737 | 24.484 | 0.450 | 0.1860 |
| FBgn0037022 | 36.257  | 2.891  | 0.115 | 0.0400 |
| FBgn0045980 | 838.850 | 8.571  | 0.044 | 0.0012 |
| FBgn0041229 | 30.833  | 3.333  | 0.180 | 0.0455 |
| FBgn0011481 | 28.624  | 2.510  | 0.110 | 0.0426 |
| FBgn0039637 | 17.259  | 2.663  | 0.205 | 0.1465 |
| FBgn0052649 | 8.650   | 1.303  | 0.098 | 0.1339 |
| FBgn0032494 | 23.691  | 3.494  | 0.258 | 0.1055 |
| FBgn0037020 | 11.446  | 2.835  | 0.351 | 0.2758 |
| FBgn0024252 | 16.914  | 3.140  | 0.291 | 0.1687 |
| FBgn0038871 | 23.652  | 3.450  | 0.252 | 0.1058 |
| FBgn0031053 | 689.144 | 13.400 | 0.130 | 0.0319 |
| FBgn0027509 | 784.263 | 11.958 | 0.091 | 0.0026 |
| FBgn0039867 | 86.286  | 4.628  | 0.124 | 0.0467 |
| FBgn0039385 | 663.714 | 10.827 | 0.088 | 0.0131 |
| FBgn0035999 | 46.432  | 2.685  | 0.078 | 0.0259 |
| FBgn0019990 | 21.645  | 2.956  | 0.202 | 0.1004 |
| FBgn0052095 | 8.801   | 3.193  | 0.579 | 0.5514 |
| FBgn0035145 | 831.374 | 11.733 | 0.083 | 0.0014 |
| FBgn0022960 | 768.242 | 24.349 | 0.386 | 0.1237 |
| FBgn0051876 | 21.121  | 5.295  | 0.664 | 0.5101 |
| FBgn0031220 | 20.125  | 2.929  | 0.213 | 0.1199 |
| FBgn0000171 | 8.286   | 2.425  | 0.355 | 0.3427 |

|             |         |        |       |        |
|-------------|---------|--------|-------|--------|
| FBgn0040080 | 36.035  | 3.665  | 0.186 | 0.0433 |
| FBgn0037359 | 152.967 | 9.324  | 0.284 | 0.0537 |
| FBgn0032782 | 42.852  | 2.647  | 0.082 | 0.0221 |
| FBgn0000273 | 6.467   | 1.470  | 0.167 | 0.2175 |
| FBgn0027597 | 561.720 | 14.131 | 0.178 | 0.0485 |
| FBgn0036480 | 858.227 | 8.081  | 0.038 | 0.0095 |
| FBgn0033378 | 727.232 | 20.549 | 0.290 | 0.0547 |
| FBgn0003411 | 48.840  | 5.685  | 0.331 | 0.0939 |
| FBgn0029824 | 84.408  | 4.408  | 0.115 | 0.0082 |
| FBgn0032665 | 43.449  | 6.576  | 0.498 | 0.2562 |
| FBgn0030628 | 36.965  | 1.994  | 0.054 | 0.0175 |
| FBgn0000152 | 865.364 | 8.378  | 0.041 | 0.0004 |
| FBgn0015756 | 676.018 | 23.066 | 0.394 | 0.1306 |
| FBgn0039544 | 44.066  | 5.139  | 0.300 | 0.1315 |
| FBgn0037257 | 148.671 | 9.476  | 0.302 | 0.0735 |
| FBgn0038630 | 24.868  | 2.840  | 0.162 | 0.0772 |
| FBgn0037796 | 604.824 | 20.521 | 0.348 | 0.0987 |
| FBgn0000120 | 26.495  | 3.603  | 0.245 | 0.0711 |
| FBgn0030258 | 44.064  | 6.257  | 0.444 | 0.1950 |
| FBgn0039507 | 43.498  | 3.324  | 0.127 | 0.0406 |
| FBgn0040384 | 14.500  | 1.489  | 0.076 | 0.0659 |
| FBgn0034655 | 28.757  | 4.668  | 0.379 | 0.1558 |
| FBgn0037788 | 40.665  | 3.386  | 0.141 | 0.0278 |
| FBgn0002970 | 834.425 | 11.248 | 0.076 | 0.0022 |
| FBgn0031542 | 19.165  | 2.812  | 0.206 | 0.1048 |
| FBgn0028380 | 755.971 | 23.480 | 0.365 | 0.1057 |
| FBgn0038248 | 136.780 | 8.264  | 0.250 | 0.0363 |
| FBgn0035515 | 747.736 | 14.480 | 0.140 | 0.0212 |
| FBgn0082582 | 832.211 | 23.800 | 0.340 | 0.0870 |
| FBgn0035643 | 770.365 | 27.499 | 0.491 | 0.2333 |
| FBgn0035497 | 76.248  | 9.193  | 0.554 | 0.3268 |
| FBgn0039286 | 12.631  | 4.324  | 0.740 | 0.6624 |
| FBgn0037421 | 49.740  | 5.616  | 0.317 | 0.1013 |
| FBgn0031882 | 28.742  | 2.673  | 0.124 | 0.0582 |
| FBgn0002901 | 11.737  | 2.778  | 0.329 | 0.2618 |
| FBgn0000114 | 752.804 | 19.543 | 0.254 | 0.0405 |
| FBgn0029718 | 755.297 | 16.529 | 0.181 | 0.0276 |
| FBgn0003714 | 85.456  | 7.530  | 0.332 | 0.0841 |
| FBgn0004577 | 774.786 | 13.515 | 0.118 | 0.0152 |
| FBgn0033608 | 308.192 | 7.338  | 0.087 | 0.0098 |
| FBgn0001258 | 704.728 | 21.357 | 0.324 | 0.0874 |
| FBgn0039154 | 685.888 | 28.067 | 0.574 | 0.3419 |
| FBgn0016076 | 828.082 | 20.709 | 0.259 | 0.0388 |
| FBgn0030311 | 43.956  | 6.568  | 0.491 | 0.2543 |
| FBgn0015000 | 22.525  | 2.014  | 0.090 | 0.0600 |
| FBgn0033438 | 13.347  | 1.732  | 0.112 | 0.0889 |
| FBgn0034766 | 758.365 | 22.591 | 0.336 | 0.0842 |
| FBgn0020766 | 103.618 | 5.229  | 0.132 | 0.0253 |
| FBgn0053111 | 718.402 | 28.064 | 0.548 | 0.3387 |
| FBgn0031457 | 606.755 | 13.564 | 0.152 | 0.0191 |
| FBgn0026680 | 24.543  | 4.612  | 0.433 | 0.2513 |
| FBgn0037345 | 21.809  | 3.296  | 0.249 | 0.1111 |
| FBgn0029647 | 16.684  | 4.089  | 0.501 | 0.3424 |
| FBgn0032298 | 19.166  | 1.945  | 0.099 | 0.0707 |

|             |         |        |       |        |
|-------------|---------|--------|-------|--------|
| FBgn0033543 | 20.095  | 3.480  | 0.301 | 0.1674 |
| FBgn0022213 | 869.047 | 9.936  | 0.057 | 0.0062 |
| FBgn0039233 | 3.899   | 1.649  | 0.349 | 0.4431 |
| FBgn0037377 | 37.789  | 3.095  | 0.127 | 0.0423 |
| FBgn0032742 | 841.942 | 10.902 | 0.071 | 0.0020 |
| FBgn0002622 | 69.610  | 5.357  | 0.206 | 0.0394 |
| FBgn0029891 | 13.187  | 1.822  | 0.126 | 0.1288 |
| FBgn0000451 | 54.839  | 6.775  | 0.419 | 0.2076 |
| FBgn0033264 | 754.089 | 20.850 | 0.288 | 0.0537 |
| FBgn0035781 | 124.248 | 9.578  | 0.369 | 0.1103 |
| FBgn0035364 | 162.281 | 8.087  | 0.201 | 0.0178 |
| FBgn0032880 | 21.252  | 2.684  | 0.169 | 0.0887 |
| FBgn0030102 | 825.315 | 14.440 | 0.126 | 0.0038 |
| FBgn0052281 | 26.950  | 4.211  | 0.329 | 0.1182 |
| FBgn0004581 | 15.221  | 3.672  | 0.443 | 0.2867 |
| FBgn0032421 | 576.569 | 9.896  | 0.085 | 0.0113 |
| FBgn0039600 | 729.822 | 16.250 | 0.181 | 0.0269 |
| FBgn0039159 | 9.559   | 3.422  | 0.612 | 0.5522 |
| FBgn0010269 | 718.272 | 8.767  | 0.054 | 0.0032 |
| FBgn0030365 | 841.556 | 12.733 | 0.096 | 0.0053 |
| FBgn0032827 | 24.665  | 2.046  | 0.085 | 0.0291 |
| FBgn0053116 | 19.160  | 3.151  | 0.259 | 0.1188 |
| FBgn0039008 | 771.587 | 19.441 | 0.245 | 0.0327 |
| FBgn0033292 | 42.356  | 5.674  | 0.380 | 0.1348 |
| FBgn0000251 | 631.215 | 15.231 | 0.184 | 0.0487 |
| FBgn0037181 | 103.942 | 8.903  | 0.381 | 0.1205 |
| FBgn0040308 | 17.645  | 1.790  | 0.091 | 0.0720 |
| FBgn0040773 | 39.130  | 3.350  | 0.143 | 0.0471 |
| FBgn0028425 | 714.555 | 24.168 | 0.409 | 0.1448 |
| FBgn0010583 | 135.412 | 5.718  | 0.121 | 0.0070 |
| FBgn0034126 | 44.096  | 5.113  | 0.296 | 0.0850 |
| FBgn0031634 | 22.312  | 1.128  | 0.029 | 0.0190 |
| FBgn0010808 | 126.636 | 5.162  | 0.105 | 0.0046 |
| FBgn0031243 | 23.990  | 2.875  | 0.172 | 0.0893 |
| FBgn0038211 | 16.262  | 3.139  | 0.303 | 0.1690 |
| FBgn0030260 | 7.825   | 1.453  | 0.135 | 0.1908 |
| FBgn0033658 | 7.475   | 2.944  | 0.580 | 0.5670 |
| FBgn0039205 | 11.149  | 3.589  | 0.578 | 0.4749 |
| FBgn0063649 | 78.342  | 6.160  | 0.242 | 0.0693 |
| FBgn0053174 | 805.005 | 13.725 | 0.117 | 0.0066 |
| FBgn0010113 | 16.601  | 1.965  | 0.116 | 0.0693 |
| FBgn0032644 | 772.085 | 8.263  | 0.044 | 0.0014 |
| FBgn0035171 | 691.305 | 14.585 | 0.154 | 0.0206 |
| FBgn0015268 | 24.983  | 3.897  | 0.304 | 0.1182 |
| FBgn0024244 | 12.153  | 3.208  | 0.423 | 0.3120 |
| FBgn0035060 | 16.056  | 2.854  | 0.254 | 0.1735 |
| FBgn0067864 | 691.653 | 17.873 | 0.231 | 0.0360 |
| FBgn0039120 | 882.948 | 12.752 | 0.092 | 0.0018 |
| FBgn0039341 | 8.532   | 2.466  | 0.356 | 0.3644 |
| FBgn0034267 | 10.688  | 1.867  | 0.163 | 0.1506 |
| FBgn0037884 | 55.353  | 3.360  | 0.102 | 0.0122 |
| FBgn0003388 | 61.656  | 5.833  | 0.276 | 0.0515 |
| FBgn0004922 | 22.187  | 3.439  | 0.267 | 0.1038 |
| FBgn0030268 | 29.615  | 3.421  | 0.198 | 0.0643 |

|             |         |        |       |        |
|-------------|---------|--------|-------|--------|
| FBgn0003557 | 768.673 | 13.509 | 0.119 | 0.0124 |
| FBgn0035251 | 27.364  | 3.887  | 0.276 | 0.0949 |
| FBgn0039487 | 29.420  | 4.242  | 0.306 | 0.1138 |
| FBgn0038269 | 70.360  | 6.137  | 0.268 | 0.0822 |
| FBgn0035401 | 39.896  | 5.790  | 0.420 | 0.1910 |
| FBgn0031362 | 36.035  | 4.321  | 0.259 | 0.0691 |
| FBgn0035813 | 13.447  | 3.467  | 0.447 | 0.3263 |
| FBgn0034312 | 776.482 | 15.980 | 0.164 | 0.0160 |
| FBgn0038198 | 35.275  | 1.680  | 0.040 | 0.0117 |
| FBgn0038975 | 98.551  | 9.214  | 0.431 | 0.1761 |
| FBgn0051291 | 10.536  | 3.333  | 0.527 | 0.4403 |
| FBgn0027601 | 255.914 | 8.405  | 0.138 | 0.0254 |
| FBgn0034595 | 9.203   | 2.012  | 0.220 | 0.2309 |
| FBgn0032019 | 20.455  | 4.476  | 0.490 | 0.2953 |
| FBgn0004864 | 12.632  | 1.984  | 0.156 | 0.1312 |
| FBgn0037969 | 792.202 | 13.885 | 0.122 | 0.0050 |
| FBgn0035848 | 22.237  | 3.450  | 0.268 | 0.1254 |
| FBgn0038694 | 598.537 | 10.555 | 0.093 | 0.0022 |
| FBgn0035687 | 13.302  | 2.091  | 0.164 | 0.1206 |
| FBgn0028419 | 30.242  | 4.325  | 0.309 | 0.1543 |
| FBgn0030158 | 29.259  | 3.302  | 0.186 | 0.0664 |
| FBgn0035827 | 49.683  | 3.393  | 0.116 | 0.0321 |
| FBgn0030765 | 22.778  | 4.557  | 0.456 | 0.2420 |
| FBgn0037261 | 7.594   | 1.624  | 0.174 | 0.2058 |
| FBgn0033341 | 5.116   | 1.629  | 0.259 | 0.3335 |
| FBgn0036661 | 460.561 | 17.670 | 0.339 | 0.0862 |
| FBgn0034452 | 150.719 | 9.726  | 0.314 | 0.0784 |
| FBgn0039175 | 734.273 | 16.221 | 0.179 | 0.0242 |
| FBgn0038928 | 814.979 | 19.012 | 0.222 | 0.0231 |
| FBgn0037546 | 667.045 | 22.892 | 0.393 | 0.1300 |
| FBgn0033677 | 847.732 | 20.344 | 0.244 | 0.0327 |
| FBgn0041630 | 168.632 | 8.076  | 0.193 | 0.0225 |
| FBgn0038640 | 85.891  | 6.190  | 0.223 | 0.0259 |
| FBgn0028954 | 630.166 | 19.620 | 0.305 | 0.0635 |
| FBgn0031914 | 28.083  | 5.281  | 0.497 | 0.3115 |
| FBgn0037672 | 16.064  | 3.551  | 0.393 | 0.2440 |
| FBgn0029870 | 634.201 | 21.586 | 0.367 | 0.1078 |
| FBgn0032429 | 26.318  | 4.491  | 0.383 | 0.1678 |
| FBgn0050443 | 24.603  | 1.797  | 0.066 | 0.0445 |
| FBgn0037351 | 6.572   | 2.069  | 0.326 | 0.3633 |
| FBgn0033872 | 165.509 | 9.841  | 0.293 | 0.0686 |
| FBgn0034723 | 20.101  | 2.870  | 0.205 | 0.1266 |
| FBgn0038608 | 795.301 | 19.889 | 0.249 | 0.0410 |
| FBgn0023097 | 761.101 | 20.350 | 0.272 | 0.0515 |
| FBgn0035631 | 776.357 | 21.006 | 0.284 | 0.0513 |
| FBgn0037978 | 79.136  | 3.509  | 0.078 | 0.0135 |
| FBgn0039114 | 739.404 | 29.727 | 0.598 | 0.3752 |
| FBgn0029161 | 17.372  | 1.461  | 0.061 | 0.0406 |
| FBgn0000182 | 15.525  | 4.655  | 0.698 | 0.5859 |
| FBgn0005642 | 667.251 | 9.677  | 0.070 | 0.0028 |
| FBgn0033478 | 20.639  | 3.366  | 0.274 | 0.1221 |
| FBgn0050263 | 726.983 | 21.008 | 0.304 | 0.0623 |
| FBgn0032688 | 10.432  | 2.706  | 0.351 | 0.2830 |
| FBgn0050497 | 28.081  | 2.616  | 0.122 | 0.0374 |

|             |         |        |       |        |
|-------------|---------|--------|-------|--------|
| FBgn0038870 | 81.249  | 6.447  | 0.256 | 0.0573 |
| FBgn0035404 | 859.994 | 13.321 | 0.103 | 0.0029 |
| FBgn0034057 | 651.220 | 32.861 | 0.829 | 0.6494 |
| FBgn0040475 | 16.186  | 2.155  | 0.143 | 0.1125 |
| FBgn0030357 | 34.628  | 6.302  | 0.573 | 0.3797 |
| FBgn0026479 | 20.030  | 4.696  | 0.550 | 0.3466 |
| FBgn0039312 | 33.122  | 4.597  | 0.319 | 0.1084 |
| FBgn0028540 | 11.047  | 2.262  | 0.232 | 0.1962 |
| FBgn0022238 | 17.722  | 2.247  | 0.142 | 0.0828 |
| FBgn0036266 | 10.011  | 2.783  | 0.387 | 0.3452 |
| FBgn0038877 | 15.096  | 1.809  | 0.108 | 0.0796 |
| FBgn0039886 | 11.618  | 2.548  | 0.279 | 0.2320 |
| FBgn0003502 | 797.660 | 19.798 | 0.246 | 0.0330 |
| FBgn0033648 | 19.845  | 2.846  | 0.204 | 0.0973 |
| FBgn0037227 | 35.708  | 5.030  | 0.354 | 0.1548 |
| FBgn0004914 | 17.831  | 2.235  | 0.140 | 0.0888 |
| FBgn0052631 | 43.279  | 3.968  | 0.182 | 0.0477 |
| FBgn0036817 | 103.127 | 7.163  | 0.249 | 0.0354 |
| FBgn0015624 | 502.641 | 16.039 | 0.256 | 0.0417 |
| FBgn0031639 | 10.102  | 2.578  | 0.329 | 0.3046 |
| FBgn0037944 | 41.599  | 6.076  | 0.444 | 0.1981 |
| FBgn0000543 | 738.100 | 16.398 | 0.182 | 0.0131 |
| FBgn0029659 | 859.274 | 14.862 | 0.129 | 0.0046 |
| FBgn0001280 | 106.449 | 9.270  | 0.404 | 0.1669 |
| FBgn0015019 | 104.154 | 4.759  | 0.109 | 0.0062 |
| FBgn0027081 | 809.710 | 13.743 | 0.117 | 0.0101 |
| FBgn0027932 | 40.266  | 2.592  | 0.083 | 0.0161 |
| FBgn0025455 | 14.889  | 2.303  | 0.178 | 0.1597 |
| FBgn0000352 | 808.619 | 17.900 | 0.198 | 0.0168 |
| FBgn0030894 | 131.444 | 2.515  | 0.024 | 0.0040 |
| FBgn0035850 | 43.344  | 2.667  | 0.082 | 0.0121 |
| FBgn0034876 | 643.931 | 16.391 | 0.209 | 0.0842 |
| FBgn0039330 | 20.977  | 5.031  | 0.603 | 0.4263 |
| FBgn0039178 | 794.962 | 14.267 | 0.128 | 0.0068 |
| FBgn0030343 | 57.553  | 4.674  | 0.190 | 0.0454 |
| FBgn0026173 | 747.115 | 14.161 | 0.134 | 0.0318 |
| FBgn0000659 | 35.523  | 4.785  | 0.322 | 0.1149 |
| FBgn0036180 | 769.188 | 9.506  | 0.059 | 0.0021 |
| FBgn0035268 | 50.729  | 5.430  | 0.291 | 0.0890 |
| FBgn0000588 | 7.317   | 2.348  | 0.377 | 0.3854 |
| FBgn0036650 | 13.909  | 2.268  | 0.185 | 0.1327 |
| FBgn0026722 | 25.688  | 2.639  | 0.136 | 0.0715 |
| FBgn0015562 | 26.428  | 4.594  | 0.399 | 0.1919 |
| FBgn0037374 | 803.659 | 13.161 | 0.108 | 0.0059 |
| FBgn0039668 | 12.839  | 2.791  | 0.303 | 0.2290 |
| FBgn0029994 | 555.314 | 23.599 | 0.501 | 0.2610 |
| FBgn0031003 | 37.249  | 5.257  | 0.371 | 0.1373 |
| FBgn0036342 | 13.351  | 3.922  | 0.576 | 0.4564 |
| FBgn0026143 | 16.651  | 4.366  | 0.572 | 0.4216 |
| FBgn0003169 | 756.726 | 13.107 | 0.114 | 0.0231 |
| FBgn0028838 | 25.824  | 1.726  | 0.058 | 0.0208 |
| FBgn0003965 | 23.093  | 3.451  | 0.258 | 0.0933 |
| FBgn0032725 | 7.251   | 4.576  | 1.444 | 0.5578 |
| FBgn0038107 | 27.448  | 2.991  | 0.163 | 0.0715 |



|             |         |        |       |        |
|-------------|---------|--------|-------|--------|
| FBgn0031815 | 17.571  | 1.692  | 0.081 | 0.0597 |
| FBgn0027111 | 13.704  | 2.799  | 0.286 | 0.1954 |
| FBgn0031579 | 675.339 | 21.486 | 0.342 | 0.0973 |
| FBgn0033351 | 50.834  | 3.134  | 0.097 | 0.0229 |
| FBgn0038602 | 17.935  | 3.360  | 0.315 | 0.1475 |
| FBgn0034999 | 85.818  | 2.964  | 0.051 | 0.0189 |
| FBgn0036708 | 22.589  | 1.636  | 0.059 | 0.0335 |
| FBgn0037665 | 83.079  | 5.006  | 0.151 | 0.0194 |
| FBgn0038498 | 695.742 | 14.467 | 0.150 | 0.0078 |
| FBgn0039156 | 705.587 | 10.396 | 0.077 | 0.0093 |
| FBgn0023530 | 72.429  | 4.738  | 0.155 | 0.0186 |
| FBgn0020416 | 38.912  | 3.627  | 0.169 | 0.0434 |
| FBgn0035273 | 726.120 | 18.127 | 0.226 | 0.0315 |
| FBgn0025809 | 24.292  | 3.389  | 0.236 | 0.1112 |
| FBgn0039553 | 27.309  | 4.018  | 0.296 | 0.1305 |
| FBgn0005617 | 845.450 | 17.501 | 0.181 | 0.0126 |
| FBgn0031377 | 778.904 | 19.925 | 0.255 | 0.0368 |
| FBgn0038894 | 737.208 | 12.475 | 0.106 | 0.0404 |
| FBgn0039065 | 32.273  | 4.812  | 0.359 | 0.1657 |
| FBgn0028342 | 773.554 | 17.352 | 0.195 | 0.0158 |
| FBgn0027453 | 51.223  | 4.689  | 0.215 | 0.0406 |
| FBgn0039880 | 14.610  | 4.765  | 0.777 | 0.6915 |
| FBgn0034521 | 678.466 | 20.764 | 0.318 | 0.1344 |
| FBgn0001120 | 61.926  | 5.366  | 0.233 | 0.0368 |
| FBgn0030205 | 317.430 | 6.815  | 0.073 | 0.0042 |
| FBgn0001174 | 645.725 | 24.938 | 0.482 | 0.2223 |
| FBgn0032511 | 234.588 | 11.183 | 0.267 | 0.0425 |
| FBgn0034425 | 23.877  | 3.091  | 0.200 | 0.0794 |
| FBgn0020391 | 834.100 | 12.588 | 0.095 | 0.0018 |
| FBgn0034691 | 30.438  | 2.999  | 0.148 | 0.0602 |
| FBgn0025781 | 83.139  | 7.450  | 0.334 | 0.1724 |
| FBgn0002932 | 843.706 | 17.905 | 0.190 | 0.0141 |
| FBgn0026432 | 696.317 | 12.891 | 0.119 | 0.0050 |
| FBgn0037615 | 5.485   | 2.116  | 0.408 | 0.4617 |
| FBgn0038577 | 47.805  | 5.017  | 0.263 | 0.0733 |
| FBgn0037849 | 5.307   | 1.447  | 0.197 | 0.2652 |
| FBgn0039169 | 17.580  | 3.249  | 0.300 | 0.1672 |
| FBgn0033358 | 815.232 | 18.634 | 0.213 | 0.0211 |
| FBgn0022709 | 71.178  | 5.769  | 0.234 | 0.0378 |
| FBgn0039254 | 13.786  | 2.039  | 0.151 | 0.1001 |
| FBgn0031545 | 756.280 | 17.359 | 0.199 | 0.0466 |
| FBgn0038188 | 11.515  | 2.989  | 0.388 | 0.3406 |
| FBgn0040280 | 21.068  | 3.395  | 0.273 | 0.1452 |
| FBgn0035944 | 17.044  | 2.163  | 0.137 | 0.1051 |
| FBgn0038835 | 22.372  | 1.909  | 0.081 | 0.0350 |
| FBgn0026592 | 13.539  | 4.128  | 0.629 | 0.5125 |
| FBgn0030840 | 633.411 | 23.254 | 0.427 | 0.1718 |
| FBgn0039177 | 26.213  | 4.575  | 0.399 | 0.1859 |
| FBgn0022070 | 725.281 | 15.180 | 0.159 | 0.0162 |
| FBgn0014020 | 17.852  | 1.621  | 0.074 | 0.0584 |
| FBgn0031608 | 38.228  | 3.562  | 0.166 | 0.0275 |
| FBgn0032374 | 682.758 | 18.696 | 0.256 | 0.0583 |
| FBgn0031598 | 26.953  | 2.930  | 0.159 | 0.0785 |
| FBgn0037635 | 31.397  | 1.848  | 0.054 | 0.0331 |

|             |         |        |       |        |
|-------------|---------|--------|-------|--------|
| FBgn0032299 | 24.789  | 3.572  | 0.257 | 0.1131 |
| FBgn0014868 | 139.557 | 4.601  | 0.076 | 0.0021 |
| FBgn0034791 | 27.081  | 2.996  | 0.166 | 0.0435 |
| FBgn0031955 | 19.087  | 3.672  | 0.353 | 0.1936 |
| FBgn0035703 | 813.317 | 10.913 | 0.073 | 0.0049 |
| FBgn0035162 | 856.112 | 12.726 | 0.095 | 0.0015 |
| FBgn0003041 | 36.679  | 3.409  | 0.158 | 0.0331 |
| FBgn0029896 | 32.229  | 3.414  | 0.181 | 0.0429 |
| FBgn0015360 | 95.068  | 4.989  | 0.131 | 0.0166 |
| FBgn0039572 | 710.661 | 15.519 | 0.169 | 0.0412 |
| FBgn0051365 | 28.637  | 2.369  | 0.098 | 0.0477 |
| FBgn0031912 | 822.312 | 15.315 | 0.143 | 0.0069 |
| FBgn0033773 | 25.001  | 3.015  | 0.182 | 0.0748 |
| FBgn0032727 | 45.705  | 2.479  | 0.067 | 0.0278 |
| FBgn0052176 | 178.368 | 7.596  | 0.162 | 0.0110 |
| FBgn0038195 | 28.625  | 2.310  | 0.093 | 0.0423 |
| FBgn0033783 | 763.206 | 6.962  | 0.032 | 0.0043 |
| FBgn0039116 | 9.954   | 2.138  | 0.230 | 0.2048 |
| FBgn0052179 | 794.480 | 18.602 | 0.218 | 0.0261 |
| FBgn0028494 | 52.202  | 4.168  | 0.166 | 0.0528 |
| FBgn0003339 | 19.073  | 2.938  | 0.226 | 0.1079 |
| FBgn0037582 | 26.734  | 2.725  | 0.139 | 0.0593 |
| FBgn0032682 | 814.834 | 14.173 | 0.123 | 0.0035 |
| FBgn0031306 | 604.904 | 32.766 | 0.887 | 0.8257 |
| FBgn0004868 | 14.580  | 2.967  | 0.302 | 0.2013 |
| FBgn0003969 | 5.598   | 2.171  | 0.421 | 0.4737 |
| FBgn0033068 | 811.576 | 14.945 | 0.138 | 0.0059 |
| FBgn0031251 | 8.921   | 2.092  | 0.245 | 0.2540 |
| FBgn0001961 | 5.764   | 2.145  | 0.399 | 0.4469 |
| FBgn0015829 | 23.044  | 3.306  | 0.237 | 0.1124 |
| FBgn0064119 | 9.874   | 1.832  | 0.170 | 0.1607 |
| FBgn0038358 | 25.852  | 3.126  | 0.189 | 0.0842 |
| FBgn0010548 | 731.061 | 20.475 | 0.287 | 0.0527 |
| FBgn0022382 | 92.707  | 4.913  | 0.130 | 0.0266 |
| FBgn0034310 | 20.282  | 1.112  | 0.030 | 0.0268 |
| FBgn0003031 | 692.129 | 12.770 | 0.118 | 0.0069 |
| FBgn0052488 | 851.882 | 14.581 | 0.125 | 0.0136 |
| FBgn0036918 | 13.137  | 2.754  | 0.289 | 0.2028 |
| FBgn0034096 | 20.496  | 1.538  | 0.058 | 0.0512 |
| FBgn0024992 | 123.380 | 5.430  | 0.120 | 0.0210 |
| FBgn0067317 | 5.500   | 3.091  | 0.869 | 0.8784 |
| FBgn0011227 | 21.777  | 5.761  | 0.762 | 0.6568 |
| FBgn0004379 | 24.432  | 2.455  | 0.123 | 0.0465 |
| FBgn0038395 | 20.494  | 4.694  | 0.538 | 0.3678 |
| FBgn0050428 | 41.639  | 3.129  | 0.118 | 0.0244 |
| FBgn0032846 | 31.126  | 1.806  | 0.052 | 0.0204 |
| FBgn0003638 | 12.031  | 2.080  | 0.180 | 0.1349 |
| FBgn0028692 | 114.325 | 8.784  | 0.337 | 0.0854 |
| FBgn0031372 | 787.254 | 17.350 | 0.191 | 0.0150 |
| FBgn0052177 | 750.335 | 17.640 | 0.207 | 0.0356 |
| FBgn0004855 | 767.051 | 20.243 | 0.267 | 0.0425 |
| FBgn0015608 | 13.095  | 1.412  | 0.076 | 0.0662 |
| FBgn0037289 | 27.257  | 3.373  | 0.209 | 0.0718 |
| FBgn0038923 | 82.651  | 3.410  | 0.070 | 0.0083 |

|             |         |        |       |        |
|-------------|---------|--------|-------|--------|
| FBgn0033787 | 11.918  | 2.128  | 0.190 | 0.1690 |
| FBgn0037708 | 28.411  | 3.474  | 0.212 | 0.0958 |
| FBgn0033184 | 19.986  | 3.170  | 0.251 | 0.1285 |
| FBgn0038316 | 27.386  | 2.487  | 0.113 | 0.0372 |
| FBgn0031261 | 32.375  | 5.197  | 0.417 | 0.1714 |
| FBgn0026404 | 28.294  | 3.444  | 0.210 | 0.0764 |
| FBgn0034499 | 721.071 | 19.968 | 0.276 | 0.0472 |
| FBgn0029709 | 19.045  | 2.561  | 0.172 | 0.0872 |
| FBgn0036948 | 16.837  | 3.444  | 0.352 | 0.1826 |
| FBgn0003231 | 35.061  | 4.636  | 0.307 | 0.0853 |
| FBgn0024983 | 20.824  | 3.134  | 0.236 | 0.1037 |
| FBgn0010768 | 226.780 | 11.324 | 0.283 | 0.0506 |
| FBgn0037275 | 707.655 | 16.183 | 0.185 | 0.0193 |
| FBgn0031782 | 5.888   | 1.401  | 0.167 | 0.2400 |
| FBgn0037360 | 11.760  | 1.170  | 0.058 | 0.0700 |
| FBgn0020300 | 53.436  | 5.527  | 0.286 | 0.0820 |
| FBgn0035085 | 77.494  | 6.012  | 0.233 | 0.0325 |
| FBgn0030815 | 33.885  | 5.957  | 0.524 | 0.3186 |
| FBgn0010772 | 36.489  | 3.973  | 0.216 | 0.0533 |
| FBgn0002787 | 26.071  | 1.935  | 0.072 | 0.0249 |
| FBgn0031899 | 438.308 | 8.850  | 0.089 | 0.0097 |
| FBgn0036139 | 31.909  | 4.152  | 0.270 | 0.1234 |
| FBgn0034289 | 736.632 | 25.025 | 0.425 | 0.1608 |
| FBgn0030384 | 9.634   | 2.861  | 0.425 | 0.3963 |
| FBgn0037782 | 33.434  | 3.630  | 0.197 | 0.0565 |
| FBgn0039419 | 28.851  | 4.863  | 0.410 | 0.1809 |
| FBgn0050101 | 116.813 | 7.469  | 0.239 | 0.0724 |
| FBgn0037239 | 37.687  | 4.379  | 0.254 | 0.0769 |
| FBgn0030358 | 60.917  | 7.475  | 0.459 | 0.2284 |
| FBgn0027595 | 436.215 | 14.939 | 0.256 | 0.0753 |
| FBgn0035295 | 42.605  | 2.741  | 0.088 | 0.0357 |
| FBgn0035328 | 735.643 | 17.493 | 0.208 | 0.0518 |
| FBgn0021847 | 20.435  | 3.209  | 0.252 | 0.1041 |
| FBgn0035372 | 15.834  | 2.061  | 0.134 | 0.0948 |
| FBgn0031805 | 13.655  | 2.647  | 0.257 | 0.1869 |
| FBgn0032187 | 698.301 | 25.303 | 0.458 | 0.1962 |
| FBgn0039153 | 869.487 | 12.886 | 0.095 | 0.0028 |
| FBgn0053329 | 828.103 | 7.109  | 0.031 | 0.0035 |
| FBgn0030775 | 20.972  | 0.982  | 0.023 | 0.0218 |
| FBgn0022288 | 4.963   | 1.355  | 0.185 | 0.2632 |
| FBgn0038147 | 715.701 | 18.615 | 0.242 | 0.0517 |
| FBgn0035902 | 37.788  | 2.834  | 0.106 | 0.0253 |
| FBgn0031947 | 11.064  | 2.409  | 0.262 | 0.2157 |
| FBgn0038829 | 793.992 | 14.894 | 0.140 | 0.0067 |
| FBgn0023130 | 30.233  | 2.956  | 0.145 | 0.0572 |
| FBgn0032442 | 18.020  | 3.551  | 0.350 | 0.1799 |
| FBgn0030508 | 151.663 | 6.673  | 0.147 | 0.0333 |
| FBgn0052479 | 49.281  | 4.422  | 0.198 | 0.0652 |
| FBgn0015790 | 20.807  | 3.768  | 0.341 | 0.1801 |
| FBgn0032728 | 13.146  | 2.640  | 0.265 | 0.1799 |
| FBgn0039459 | 592.835 | 23.268 | 0.457 | 0.1928 |
| FBgn0032470 | 804.284 | 20.677 | 0.266 | 0.0420 |
| FBgn0038771 | 50.582  | 6.117  | 0.370 | 0.1403 |
| FBgn0033639 | 129.979 | 4.087  | 0.064 | 0.0094 |

|             |         |        |       |        |
|-------------|---------|--------|-------|--------|
| FBgn0010398 | 78.066  | 5.667  | 0.206 | 0.0306 |
| FBgn0004369 | 738.251 | 24.722 | 0.414 | 0.1496 |
| FBgn0034433 | 787.354 | 18.943 | 0.228 | 0.0261 |
| FBgn0004896 | 17.620  | 4.210  | 0.503 | 0.3281 |
| FBgn0032929 | 15.702  | 2.624  | 0.219 | 0.1533 |
| FBgn0032343 | 730.922 | 15.538 | 0.165 | 0.0296 |
| FBgn0039841 | 19.266  | 3.921  | 0.399 | 0.2398 |
| FBgn0038013 | 66.773  | 5.106  | 0.195 | 0.0239 |
| FBgn0038233 | 16.509  | 2.684  | 0.218 | 0.1559 |
| FBgn0039836 | 10.754  | 0.814  | 0.031 | 0.0495 |
| FBgn0037780 | 10.571  | 0.980  | 0.045 | 0.0655 |
| FBgn0015721 | 14.052  | 2.177  | 0.169 | 0.1358 |
| FBgn0050390 | 21.207  | 2.361  | 0.131 | 0.0795 |
| FBgn0032879 | 13.164  | 2.245  | 0.191 | 0.1378 |
| FBgn0028679 | 103.280 | 8.801  | 0.375 | 0.1154 |
| FBgn0039837 | 11.975  | 2.080  | 0.181 | 0.1535 |
| FBgn0031596 | 536.551 | 15.557 | 0.226 | 0.0878 |
| FBgn0037391 | 26.788  | 2.739  | 0.140 | 0.0600 |
| FBgn0038207 | 27.966  | 2.279  | 0.093 | 0.0439 |
| FBgn0011829 | 14.061  | 3.345  | 0.398 | 0.2435 |
| FBgn0039110 | 710.533 | 19.165 | 0.258 | 0.0521 |
| FBgn0026567 | 53.680  | 4.555  | 0.193 | 0.0360 |
| FBgn0035146 | 26.724  | 2.210  | 0.091 | 0.0453 |
| FBgn0026136 | 96.416  | 4.884  | 0.124 | 0.0071 |
| FBgn0030122 | 691.792 | 19.769 | 0.282 | 0.0977 |
| FBgn0032359 | 24.441  | 2.750  | 0.155 | 0.0721 |
| FBgn0011280 | 20.007  | 5.098  | 0.649 | 0.5108 |
| FBgn0034004 | 166.717 | 9.250  | 0.257 | 0.0628 |
| FBgn0053002 | 23.903  | 4.050  | 0.343 | 0.1809 |
| FBgn0039337 | 5.538   | 2.470  | 0.551 | 0.5699 |
| FBgn0035900 | 70.981  | 4.920  | 0.171 | 0.0155 |
| FBgn0036947 | 8.805   | 1.661  | 0.157 | 0.1591 |
| FBgn0036621 | 840.123 | 20.581 | 0.252 | 0.0357 |
| FBgn0028969 | 8.791   | 2.324  | 0.307 | 0.3054 |
| FBgn0036545 | 28.151  | 3.777  | 0.253 | 0.1064 |
| FBgn0029737 | 765.314 | 17.624 | 0.203 | 0.0189 |
| FBgn0034261 | 678.548 | 11.347 | 0.095 | 0.0149 |
| FBgn0030805 | 23.485  | 4.031  | 0.346 | 0.1789 |
| FBgn0033837 | 145.343 | 4.028  | 0.056 | 0.0174 |
| FBgn0030991 | 25.606  | 3.344  | 0.218 | 0.0717 |
| FBgn0038131 | 22.157  | 1.827  | 0.075 | 0.0334 |
| FBgn0038538 | 31.346  | 4.981  | 0.396 | 0.1639 |
| FBgn0030673 | 63.056  | 4.625  | 0.170 | 0.0510 |
| FBgn0032816 | 781.417 | 15.167 | 0.147 | 0.0103 |
| FBgn0030157 | 677.339 | 31.911 | 0.752 | 0.6096 |
| FBgn0022786 | 39.441  | 3.943  | 0.197 | 0.0533 |
| FBgn0038762 | 184.727 | 2.873  | 0.022 | 0.0006 |
| FBgn0036105 | 814.966 | 22.249 | 0.304 | 0.0625 |
| FBgn0035106 | 687.883 | 21.960 | 0.351 | 0.0998 |
| FBgn0034902 | 45.510  | 4.903  | 0.264 | 0.0942 |
| FBgn0029642 | 35.979  | 4.430  | 0.273 | 0.1136 |
| FBgn0035922 | 21.118  | 5.232  | 0.648 | 0.4904 |
| FBgn0033859 | 18.215  | 1.993  | 0.109 | 0.0754 |
| FBgn0042138 | 828.710 | 8.466  | 0.043 | 0.0035 |

|             |         |        |       |        |
|-------------|---------|--------|-------|--------|
| FBgn0038819 | 44.187  | 3.075  | 0.107 | 0.0378 |
| FBgn0002775 | 828.435 | 11.102 | 0.074 | 0.0074 |
| FBgn0013548 | 690.430 | 19.738 | 0.282 | 0.0702 |
| FBgn0036397 | 11.475  | 2.800  | 0.342 | 0.2656 |
| FBgn0027885 | 49.882  | 4.190  | 0.176 | 0.0291 |
| FBgn0045852 | 21.442  | 4.456  | 0.463 | 0.2620 |
| FBgn0029929 | 17.906  | 1.580  | 0.070 | 0.0548 |
| FBgn0035480 | 798.336 | 18.374 | 0.211 | 0.0205 |
| FBgn0028985 | 14.631  | 3.336  | 0.380 | 0.2237 |
| FBgn0035743 | 15.977  | 5.682  | 1.010 | 0.9866 |
| FBgn0034210 | 241.249 | 8.050  | 0.134 | 0.0100 |
| FBgn0033539 | 24.728  | 3.956  | 0.316 | 0.1513 |
| FBgn0038763 | 30.535  | 1.906  | 0.060 | 0.0284 |
| FBgn0034379 | 38.552  | 3.447  | 0.154 | 0.0407 |
| FBgn0016726 | 31.585  | 5.214  | 0.430 | 0.2280 |
| FBgn0034029 | 754.981 | 9.429  | 0.059 | 0.0121 |
| FBgn0034738 | 651.579 | 13.684 | 0.144 | 0.0455 |
| FBgn0024558 | 11.901  | 3.963  | 0.660 | 0.5706 |
| FBgn0032010 | 764.559 | 7.458  | 0.036 | 0.0018 |
| FBgn0005390 | 7.732   | 2.097  | 0.284 | 0.3160 |
| FBgn0031905 | 156.436 | 5.273  | 0.089 | 0.0032 |
| FBgn0039848 | 5.161   | 1.833  | 0.326 | 0.3980 |
| FBgn0034463 | 18.928  | 4.846  | 0.620 | 0.4557 |
| FBgn0037422 | 13.172  | 3.646  | 0.505 | 0.3744 |
| FBgn0003279 | 48.100  | 5.785  | 0.348 | 0.1533 |
| FBgn0039807 | 10.605  | 2.062  | 0.200 | 0.1729 |
| FBgn0028519 | 17.117  | 1.450  | 0.061 | 0.0596 |
| FBgn0004698 | 9.457   | 1.438  | 0.109 | 0.1210 |
| FBgn0038294 | 655.038 | 21.050 | 0.338 | 0.0855 |
| FBgn0028429 | 12.214  | 2.361  | 0.228 | 0.2014 |
| FBgn0053529 | 16.435  | 2.402  | 0.176 | 0.1015 |
| FBgn0034081 | 24.835  | 3.108  | 0.194 | 0.0733 |
| FBgn0035526 | 795.706 | 14.643 | 0.135 | 0.0048 |
| FBgn0037035 | 7.508   | 2.496  | 0.415 | 0.4176 |
| FBgn0038039 | 24.177  | 5.376  | 0.598 | 0.4321 |
| FBgn0039726 | 14.557  | 1.469  | 0.074 | 0.0871 |
| FBgn0042712 | 29.005  | 3.874  | 0.259 | 0.0846 |
| FBgn0035163 | 10.871  | 2.837  | 0.370 | 0.3224 |
| FBgn0025681 | 10.721  | 1.863  | 0.162 | 0.1511 |
| FBgn0038749 | 96.307  | 4.454  | 0.103 | 0.0058 |
| FBgn0034528 | 18.041  | 2.815  | 0.220 | 0.1107 |
| FBgn0030052 | 195.588 | 10.243 | 0.268 | 0.0502 |
| FBgn0039710 | 28.459  | 4.955  | 0.431 | 0.2407 |
| FBgn0037846 | 15.351  | 2.558  | 0.213 | 0.1484 |
| FBgn0027529 | 803.585 | 15.052 | 0.141 | 0.0055 |
| FBgn0003145 | 17.143  | 2.461  | 0.177 | 0.1290 |
| FBgn0034519 | 18.665  | 3.873  | 0.402 | 0.2414 |
| FBgn0036347 | 15.362  | 4.850  | 0.765 | 0.6753 |
| FBgn0029857 | 26.682  | 3.483  | 0.227 | 0.0934 |
| FBgn0039194 | 840.634 | 9.784  | 0.057 | 0.0015 |
| FBgn0034658 | 756.745 | 18.834 | 0.234 | 0.0300 |
| FBgn0034223 | 746.652 | 17.450 | 0.204 | 0.0184 |
| FBgn0014366 | 34.143  | 3.888  | 0.221 | 0.0691 |
| FBgn0010278 | 15.825  | 1.768  | 0.099 | 0.0876 |

|             |         |        |       |        |
|-------------|---------|--------|-------|--------|
| FBgn0011211 | 29.378  | 1.720  | 0.050 | 0.0176 |
| FBgn0011259 | 19.853  | 3.275  | 0.270 | 0.1286 |
| FBgn0016970 | 6.747   | 2.545  | 0.480 | 0.4951 |
| FBgn0031568 | 25.965  | 2.145  | 0.089 | 0.0324 |
| FBgn0015372 | 14.435  | 2.327  | 0.188 | 0.1236 |
| FBgn0038582 | 629.741 | 22.030 | 0.385 | 0.1235 |
| FBgn0003386 | 25.365  | 3.910  | 0.301 | 0.1215 |
| FBgn0038755 | 709.708 | 19.450 | 0.267 | 0.0422 |
| FBgn0033174 | 737.683 | 13.709 | 0.127 | 0.0041 |
| FBgn0041161 | 797.895 | 13.350 | 0.112 | 0.0039 |
| FBgn0033375 | 746.259 | 7.957  | 0.042 | 0.0060 |
| FBgn0032497 | 669.131 | 16.236 | 0.197 | 0.0164 |
| FBgn0035977 | 49.697  | 5.849  | 0.344 | 0.1106 |
| FBgn0034399 | 840.133 | 11.238 | 0.075 | 0.0038 |
| FBgn0038658 | 12.499  | 2.641  | 0.279 | 0.1908 |
| FBgn0034854 | 719.179 | 15.612 | 0.169 | 0.0143 |
| FBgn0030288 | 49.014  | 2.708  | 0.075 | 0.0188 |
| FBgn0029820 | 117.202 | 6.071  | 0.157 | 0.0114 |
| FBgn0032312 | 34.485  | 4.181  | 0.253 | 0.0866 |
| FBgn0000153 | 34.737  | 2.631  | 0.100 | 0.0229 |
| FBgn0031505 | 697.473 | 24.190 | 0.419 | 0.1554 |
| FBgn0033051 | 634.071 | 16.564 | 0.216 | 0.0340 |
| FBgn0039590 | 645.400 | 18.439 | 0.263 | 0.0409 |
| FBgn0050431 | 62.223  | 4.079  | 0.134 | 0.0151 |
| FBgn0020617 | 800.314 | 22.302 | 0.311 | 0.0669 |
| FBgn0037447 | 37.188  | 3.073  | 0.127 | 0.0410 |
| FBgn0030028 | 21.920  | 2.792  | 0.178 | 0.0612 |
| FBgn0033750 | 25.425  | 3.875  | 0.295 | 0.1372 |
| FBgn0039302 | 28.872  | 3.249  | 0.183 | 0.0656 |
| FBgn0032781 | 22.797  | 3.081  | 0.208 | 0.1135 |
| FBgn0004838 | 133.473 | 4.917  | 0.091 | 0.0061 |
| FBgn0010591 | 45.422  | 2.197  | 0.053 | 0.0158 |
| FBgn0030379 | 14.846  | 2.387  | 0.192 | 0.1072 |
| FBgn0032869 | 18.891  | 1.877  | 0.093 | 0.0520 |
| FBgn0037411 | 809.499 | 13.793 | 0.118 | 0.0030 |
| FBgn0038799 | 792.041 | 16.929 | 0.181 | 0.0241 |
| FBgn0024754 | 193.344 | 6.366  | 0.105 | 0.0052 |
| FBgn0066114 | 691.995 | 14.780 | 0.158 | 0.0302 |
| FBgn0035313 | 11.876  | 2.225  | 0.209 | 0.1492 |
| FBgn0033883 | 7.338   | 1.594  | 0.173 | 0.2133 |
| FBgn0003302 | 11.161  | 3.248  | 0.473 | 0.3875 |
| FBgn0037467 | 11.292  | 2.282  | 0.231 | 0.2364 |
| FBgn0082585 | 713.524 | 23.738 | 0.395 | 0.1317 |
| FBgn0038337 | 778.571 | 14.164 | 0.129 | 0.0053 |
| FBgn0002629 | 575.300 | 20.289 | 0.358 | 0.1002 |
| FBgn0040754 | 15.156  | 2.370  | 0.185 | 0.1591 |
| FBgn0037265 | 664.973 | 16.032 | 0.193 | 0.0821 |
| FBgn0052856 | 33.656  | 3.990  | 0.236 | 0.0664 |
| FBgn0033794 | 787.262 | 10.241 | 0.067 | 0.0117 |
| FBgn0036566 | 26.075  | 2.894  | 0.161 | 0.0688 |
| FBgn0027339 | 30.146  | 2.902  | 0.140 | 0.0312 |
| FBgn0035226 | 77.540  | 6.110  | 0.241 | 0.0378 |
| FBgn0027617 | 12.074  | 2.258  | 0.211 | 0.1895 |
| FBgn0030298 | 16.391  | 3.242  | 0.321 | 0.1764 |

|             |         |        |       |        |
|-------------|---------|--------|-------|--------|
| FBgn0038931 | 70.174  | 7.567  | 0.408 | 0.2387 |
| FBgn0025885 | 26.687  | 2.136  | 0.085 | 0.0304 |
| FBgn0003498 | 792.497 | 11.113 | 0.078 | 0.0030 |
| FBgn0033094 | 29.413  | 2.089  | 0.074 | 0.0367 |
| FBgn0050165 | 132.870 | 12.428 | 0.581 | 0.3527 |
| FBgn0031811 | 797.984 | 14.079 | 0.124 | 0.0041 |
| FBgn0004638 | 18.937  | 2.955  | 0.230 | 0.1268 |
| FBgn0039796 | 24.526  | 2.993  | 0.183 | 0.0941 |
| FBgn0029121 | 38.879  | 2.820  | 0.102 | 0.0360 |
| FBgn0034035 | 10.162  | 1.888  | 0.175 | 0.1869 |
| FBgn0046874 | 42.746  | 6.544  | 0.501 | 0.2771 |
| FBgn0032734 | 20.613  | 3.013  | 0.220 | 0.0954 |
| FBgn0037521 | 128.576 | 6.262  | 0.152 | 0.0135 |
| FBgn0032406 | 842.565 | 15.130 | 0.136 | 0.0088 |
| FBgn0043455 | 29.694  | 1.531  | 0.039 | 0.0268 |
| FBgn0038267 | 57.750  | 5.519  | 0.264 | 0.0911 |
| FBgn0036894 | 31.197  | 3.897  | 0.243 | 0.0700 |
| FBgn0030299 | 28.461  | 5.915  | 0.615 | 0.4344 |
| FBgn0032409 | 69.068  | 3.546  | 0.091 | 0.0101 |
| FBgn0034835 | 711.570 | 15.761 | 0.175 | 0.0589 |
| FBgn0032078 | 786.042 | 13.274 | 0.112 | 0.0116 |
| FBgn0026751 | 96.166  | 3.488  | 0.063 | 0.0048 |
| FBgn0037559 | 859.091 | 11.993 | 0.084 | 0.0024 |
| FBgn0031842 | 6.706   | 2.419  | 0.436 | 0.4421 |
| FBgn0034018 | 755.240 | 10.948 | 0.079 | 0.0014 |
| FBgn0024291 | 18.756  | 1.556  | 0.065 | 0.0497 |
| FBgn0030593 | 567.565 | 23.426 | 0.483 | 0.2236 |
| FBgn0030808 | 27.179  | 3.827  | 0.269 | 0.0863 |
| FBgn0034017 | 30.430  | 2.739  | 0.123 | 0.0614 |
| FBgn0031662 | 122.042 | 5.363  | 0.118 | 0.0189 |
| FBgn0039470 | 15.603  | 3.208  | 0.330 | 0.2074 |
| FBgn0037382 | 26.498  | 5.344  | 0.539 | 0.3523 |
| FBgn0038297 | 627.830 | 27.201 | 0.589 | 0.3625 |
| FBgn0033884 | 21.715  | 2.619  | 0.158 | 0.0908 |
| FBgn0003600 | 31.818  | 2.943  | 0.136 | 0.0324 |
| FBgn0030634 | 835.224 | 14.501 | 0.126 | 0.0120 |
| FBgn0000564 | 12.295  | 2.473  | 0.249 | 0.1959 |
| FBgn0037773 | 835.982 | 18.027 | 0.194 | 0.0158 |
| FBgn0031971 | 721.294 | 24.303 | 0.409 | 0.1408 |
| FBgn0030006 | 810.145 | 15.017 | 0.139 | 0.0618 |
| FBgn0039380 | 698.551 | 14.065 | 0.142 | 0.0127 |
| FBgn0034611 | 764.643 | 14.609 | 0.140 | 0.0079 |
| FBgn0033988 | 758.298 | 13.608 | 0.122 | 0.0090 |
| FBgn0026718 | 38.220  | 3.775  | 0.186 | 0.0601 |
| FBgn0039274 | 26.012  | 2.417  | 0.112 | 0.0608 |
| FBgn0028744 | 751.897 | 7.932  | 0.042 | 0.0023 |
| FBgn0001077 | 20.287  | 5.898  | 0.857 | 0.7926 |
| FBgn0034270 | 9.970   | 2.278  | 0.260 | 0.2397 |
| FBgn0034644 | 8.328   | 1.066  | 0.068 | 0.1076 |
| FBgn0034735 | 16.159  | 2.458  | 0.187 | 0.1348 |
| FBgn0052250 | 685.229 | 17.903 | 0.234 | 0.0550 |
| FBgn0038458 | 806.439 | 11.100 | 0.076 | 0.0015 |
| FBgn0010620 | 19.281  | 3.019  | 0.236 | 0.1192 |
| FBgn0051169 | 18.818  | 4.890  | 0.635 | 0.4886 |

|             |         |        |       |        |
|-------------|---------|--------|-------|--------|
| FBgn0041709 | 770.876 | 15.900 | 0.164 | 0.0091 |
| FBgn0002306 | 33.341  | 3.023  | 0.137 | 0.0484 |
| FBgn0037255 | 78.312  | 5.994  | 0.229 | 0.0346 |
| FBgn0022774 | 684.523 | 29.292 | 0.627 | 0.4171 |
| FBgn0011763 | 38.333  | 4.349  | 0.247 | 0.0640 |
| FBgn0029113 | 48.046  | 3.687  | 0.141 | 0.0201 |
| FBgn0039112 | 9.231   | 1.355  | 0.100 | 0.1291 |
| FBgn0020414 | 695.518 | 16.764 | 0.202 | 0.0669 |
| FBgn0051344 | 34.117  | 4.428  | 0.287 | 0.1047 |
| FBgn0038126 | 8.772   | 2.060  | 0.242 | 0.2481 |
| FBgn0014455 | 588.695 | 17.397 | 0.257 | 0.0838 |
| FBgn0051803 | 26.848  | 4.216  | 0.331 | 0.1170 |
| FBgn0030390 | 30.986  | 7.562  | 0.923 | 0.8882 |
| FBgn0001134 | 14.579  | 2.138  | 0.157 | 0.1434 |
| FBgn0038916 | 95.573  | 3.723  | 0.072 | 0.0105 |
| FBgn0030841 | 21.394  | 2.776  | 0.180 | 0.0961 |
| FBgn0031824 | 891.328 | 9.016  | 0.046 | 0.0012 |
| FBgn0010520 | 84.583  | 2.248  | 0.030 | 0.0015 |
| FBgn0051151 | 825.593 | 17.751 | 0.191 | 0.0149 |
| FBgn0033933 | 726.492 | 27.653 | 0.526 | 0.2778 |
| FBgn0035788 | 765.968 | 34.658 | 0.784 | 0.6608 |
| FBgn0039283 | 8.651   | 5.212  | 1.570 | 0.4439 |
| FBgn0030447 | 138.097 | 4.442  | 0.071 | 0.0065 |
| FBgn0031649 | 18.522  | 3.209  | 0.278 | 0.1347 |
| FBgn0039757 | 678.367 | 31.989 | 0.754 | 0.6136 |
| FBgn0037027 | 151.237 | 6.348  | 0.133 | 0.0127 |
| FBgn0034089 | 57.022  | 4.849  | 0.206 | 0.0560 |
| FBgn0042092 | 17.822  | 3.611  | 0.366 | 0.2240 |
| FBgn0053277 | 798.107 | 27.298 | 0.467 | 0.2054 |
| FBgn0036323 | 9.978   | 2.873  | 0.414 | 0.3357 |
| FBgn0002645 | 5.636   | 1.788  | 0.284 | 0.3409 |
| FBgn0033998 | 706.801 | 12.071 | 0.103 | 0.0129 |
| FBgn0000499 | 816.374 | 15.813 | 0.153 | 0.0070 |
| FBgn0002783 | 817.572 | 16.464 | 0.166 | 0.0094 |
| FBgn0004101 | 740.034 | 10.544 | 0.075 | 0.0085 |
| FBgn0026090 | 660.490 | 19.444 | 0.286 | 0.0636 |
| FBgn0030858 | 675.826 | 15.992 | 0.189 | 0.0261 |
| FBgn0010413 | 403.327 | 4.810  | 0.029 | 0.0039 |
| FBgn0037756 | 11.098  | 2.145  | 0.207 | 0.1909 |
| FBgn0035283 | 708.182 | 12.965 | 0.119 | 0.0395 |
| FBgn0028475 | 795.475 | 13.852 | 0.121 | 0.0032 |
| FBgn0052159 | 8.219   | 4.264  | 1.106 | 0.8822 |
| FBgn0028499 | 829.168 | 20.245 | 0.247 | 0.0336 |
| FBgn0035635 | 692.982 | 18.601 | 0.250 | 0.0346 |
| FBgn0031312 | 17.375  | 2.978  | 0.255 | 0.1318 |
| FBgn0039296 | 888.195 | 9.260  | 0.048 | 0.0016 |
| FBgn0026369 | 753.804 | 11.826 | 0.093 | 0.0057 |
| FBgn0039628 | 714.026 | 16.860 | 0.199 | 0.0447 |
| FBgn0019925 | 139.112 | 5.652  | 0.115 | 0.0136 |
| FBgn0004377 | 8.430   | 5.470  | 1.775 | 0.3186 |
| FBgn0030230 | 52.730  | 2.533  | 0.061 | 0.0104 |
| FBgn0037857 | 19.192  | 2.937  | 0.225 | 0.1194 |
| FBgn0036357 | 27.979  | 2.923  | 0.153 | 0.0715 |
| FBgn0031722 | 724.920 | 27.193 | 0.510 | 0.2568 |



|             |         |        |       |        |
|-------------|---------|--------|-------|--------|
| FBgn0041775 | 79.495  | 5.737  | 0.207 | 0.0395 |
| FBgn0032744 | 24.792  | 2.359  | 0.112 | 0.0344 |
| FBgn0029959 | 126.268 | 7.040  | 0.196 | 0.0191 |
| FBgn0039061 | 862.484 | 8.950  | 0.046 | 0.0014 |
| FBgn0034408 | 28.334  | 4.664  | 0.384 | 0.1509 |
| FBgn0033726 | 10.190  | 4.210  | 0.870 | 0.8454 |
| FBgn0033359 | 706.849 | 25.850 | 0.473 | 0.2122 |
| FBgn0016797 | 174.149 | 6.840  | 0.134 | 0.0080 |
| FBgn0035056 | 17.625  | 2.360  | 0.158 | 0.1080 |
| FBgn0033031 | 743.205 | 18.359 | 0.227 | 0.0257 |
| FBgn0010383 | 18.552  | 2.213  | 0.132 | 0.0901 |
| FBgn0039672 | 50.189  | 4.117  | 0.169 | 0.0406 |
| FBgn0038176 | 21.863  | 4.273  | 0.418 | 0.2481 |
| FBgn0031885 | 825.845 | 14.198 | 0.122 | 0.0046 |
| FBgn0052280 | 18.066  | 2.851  | 0.225 | 0.1407 |
| FBgn0028510 | 91.506  | 6.252  | 0.214 | 0.0400 |
| FBgn0026084 | 34.838  | 4.450  | 0.284 | 0.0929 |
| FBgn0011241 | 771.326 | 19.766 | 0.253 | 0.0354 |
| FBgn0028509 | 620.055 | 9.415  | 0.071 | 0.0040 |
| FBgn0039446 | 744.724 | 23.091 | 0.358 | 0.1005 |
| FBgn0020255 | 77.052  | 6.881  | 0.307 | 0.0749 |
| FBgn0052801 | 7.765   | 3.071  | 0.607 | 0.5913 |
| FBgn0039149 | 106.339 | 5.700  | 0.153 | 0.0124 |
| FBgn0030973 | 15.222  | 2.868  | 0.270 | 0.1951 |
| FBgn0034518 | 48.558  | 3.483  | 0.125 | 0.0244 |
| FBgn0052551 | 15.293  | 1.961  | 0.126 | 0.1093 |
| FBgn0030719 | 18.495  | 3.988  | 0.430 | 0.2878 |
| FBgn0000639 | 15.502  | 4.686  | 0.708 | 0.6027 |
| FBgn0032362 | 14.164  | 2.071  | 0.151 | 0.1133 |
| FBgn0031519 | 33.923  | 3.278  | 0.158 | 0.0618 |
| FBgn0008651 | 139.591 | 16.466 | 0.971 | 0.9573 |
| FBgn0053189 | 799.906 | 15.137 | 0.143 | 0.0506 |
| FBgn0035443 | 21.206  | 4.788  | 0.541 | 0.3384 |
| FBgn0003483 | 757.269 | 19.309 | 0.246 | 0.0332 |
| FBgn0038691 | 11.733  | 4.326  | 0.797 | 0.7288 |
| FBgn0035869 | 195.923 | 14.212 | 0.515 | 0.2645 |
| FBgn0024362 | 70.626  | 6.054  | 0.260 | 0.0430 |
| FBgn0030170 | 6.902   | 2.372  | 0.408 | 0.4343 |
| FBgn0029747 | 10.558  | 2.077  | 0.204 | 0.1974 |
| FBgn0024371 | 24.679  | 1.410  | 0.040 | 0.0272 |
| FBgn0033357 | 115.645 | 9.761  | 0.412 | 0.1773 |
| FBgn0010434 | 55.761  | 3.198  | 0.092 | 0.0217 |
| FBgn0001324 | 125.426 | 13.737 | 0.752 | 0.6110 |
| FBgn0034054 | 7.725   | 1.156  | 0.087 | 0.1168 |
| FBgn0027609 | 21.463  | 2.685  | 0.168 | 0.0652 |
| FBgn0037478 | 18.319  | 1.801  | 0.089 | 0.0459 |
| FBgn0037445 | 107.853 | 3.343  | 0.052 | 0.0025 |
| FBgn0035689 | 747.717 | 17.979 | 0.216 | 0.0485 |
| FBgn0002022 | 20.071  | 2.378  | 0.141 | 0.0788 |
| FBgn0028658 | 10.474  | 2.248  | 0.241 | 0.2138 |
| FBgn0038957 | 18.962  | 1.931  | 0.098 | 0.0570 |
| FBgn0038917 | 791.102 | 11.308 | 0.081 | 0.0365 |
| FBgn0034468 | 684.479 | 27.896 | 0.568 | 0.3346 |
| FBgn0038922 | 813.978 | 18.686 | 0.214 | 0.0216 |

|             |         |        |       |        |
|-------------|---------|--------|-------|--------|
| FBgn0028518 | 772.273 | 20.114 | 0.262 | 0.0401 |
| FBgn0037305 | 27.612  | 4.877  | 0.431 | 0.2247 |
| FBgn0039195 | 803.066 | 11.756 | 0.086 | 0.0011 |
| FBgn0002121 | 739.342 | 21.433 | 0.311 | 0.0668 |
| FBgn0013467 | 718.186 | 15.429 | 0.166 | 0.0109 |
| FBgn0033426 | 22.690  | 4.734  | 0.494 | 0.2951 |
| FBgn0038876 | 19.742  | 3.190  | 0.258 | 0.1427 |
| FBgn0003612 | 753.420 | 29.417 | 0.574 | 0.3418 |
| FBgn0030611 | 26.093  | 5.018  | 0.482 | 0.2750 |
| FBgn0045842 | 30.091  | 3.030  | 0.153 | 0.0481 |
| FBgn0032895 | 25.794  | 3.606  | 0.252 | 0.0934 |
| FBgn0020622 | 21.991  | 2.789  | 0.177 | 0.0825 |
| FBgn0027490 | 753.043 | 18.529 | 0.228 | 0.0329 |
| FBgn0002924 | 16.947  | 3.366  | 0.334 | 0.2130 |
| FBgn0035903 | 32.451  | 3.981  | 0.244 | 0.0606 |
| FBgn0036672 | 172.993 | 7.565  | 0.165 | 0.0104 |
| FBgn0034112 | 783.257 | 12.134 | 0.094 | 0.0085 |
| FBgn0033552 | 5.326   | 1.608  | 0.243 | 0.3214 |
| FBgn0038276 | 54.523  | 7.082  | 0.460 | 0.2048 |
| FBgn0033730 | 33.905  | 2.893  | 0.123 | 0.0275 |
| FBgn0037371 | 15.084  | 1.757  | 0.102 | 0.0964 |
| FBgn0000377 | 48.957  | 3.769  | 0.145 | 0.0365 |
| FBgn0038827 | 60.910  | 1.209  | 0.012 | 0.0030 |
| FBgn0029893 | 111.687 | 4.635  | 0.096 | 0.0077 |
| FBgn0026077 | 67.803  | 4.982  | 0.183 | 0.0231 |
| FBgn0040623 | 15.800  | 3.765  | 0.449 | 0.3263 |
| FBgn0036718 | 40.810  | 2.340  | 0.067 | 0.0173 |
| FBgn0004635 | 865.520 | 11.556 | 0.077 | 0.0021 |
| FBgn0032691 | 16.402  | 3.716  | 0.421 | 0.2680 |
| FBgn0039265 | 4.582   | 1.571  | 0.269 | 0.3605 |
| FBgn0032397 | 776.798 | 9.653  | 0.060 | 0.0024 |
| FBgn0035229 | 723.947 | 10.483 | 0.076 | 0.0037 |
| FBgn0033891 | 36.086  | 6.235  | 0.539 | 0.3125 |
| FBgn0010660 | 580.959 | 19.519 | 0.328 | 0.0781 |
| FBgn0039527 | 5.560   | 2.556  | 0.588 | 0.6173 |
| FBgn0036648 | 96.239  | 4.085  | 0.087 | 0.0130 |
| FBgn0050105 | 81.734  | 6.335  | 0.246 | 0.0381 |
| FBgn0031640 | 669.420 | 15.474 | 0.179 | 0.0359 |
| FBgn0032800 | 13.649  | 4.001  | 0.586 | 0.4698 |
| FBgn0038806 | 59.862  | 4.160  | 0.145 | 0.0170 |
| FBgn0038902 | 24.286  | 1.921  | 0.076 | 0.0449 |
| FBgn0017429 | 743.525 | 13.058 | 0.115 | 0.0570 |
| FBgn0033032 | 37.328  | 3.809  | 0.194 | 0.0539 |
| FBgn0028292 | 37.807  | 4.360  | 0.251 | 0.0930 |
| FBgn0024994 | 44.011  | 4.995  | 0.284 | 0.0992 |
| FBgn0027528 | 17.086  | 4.531  | 0.601 | 0.4268 |
| FBgn0035624 | 605.622 | 16.757 | 0.232 | 0.0441 |
| FBgn0037321 | 80.303  | 9.582  | 0.572 | 0.3602 |
| FBgn0036374 | 14.307  | 3.131  | 0.343 | 0.2509 |
| FBgn0027338 | 49.142  | 2.895  | 0.085 | 0.0348 |
| FBgn0025383 | 31.750  | 5.093  | 0.409 | 0.1649 |
| FBgn0038897 | 103.756 | 5.380  | 0.140 | 0.0082 |
| FBgn0010894 | 690.098 | 10.869 | 0.086 | 0.0254 |
| FBgn0037368 | 825.455 | 13.600 | 0.112 | 0.0038 |

|             |         |        |       |        |
|-------------|---------|--------|-------|--------|
| FBgn0004913 | 11.476  | 2.251  | 0.221 | 0.1766 |
| FBgn0000658 | 186.515 | 11.281 | 0.341 | 0.0878 |
| FBgn0038467 | 7.841   | 1.064  | 0.072 | 0.1237 |
| FBgn0033122 | 30.091  | 3.789  | 0.239 | 0.0593 |
| FBgn0039712 | 52.907  | 5.224  | 0.258 | 0.0484 |
| FBgn0035272 | 603.002 | 22.829 | 0.432 | 0.1684 |
| FBgn0038306 | 865.016 | 10.667 | 0.066 | 0.0034 |
| FBgn0037485 | 26.449  | 3.229  | 0.197 | 0.0914 |
| FBgn0037380 | 27.116  | 3.217  | 0.191 | 0.0623 |
| FBgn0037744 | 34.330  | 3.464  | 0.175 | 0.0597 |
| FBgn0014031 | 719.013 | 19.772 | 0.272 | 0.0548 |
| FBgn0035529 | 603.607 | 18.119 | 0.272 | 0.0450 |
| FBgn0038675 | 9.628   | 3.990  | 0.827 | 0.7931 |
| FBgn0035203 | 39.576  | 2.497  | 0.079 | 0.0393 |
| FBgn0033466 | 99.036  | 6.944  | 0.243 | 0.0341 |
| FBgn0031692 | 525.464 | 19.182 | 0.350 | 0.1846 |
| FBgn0037680 | 678.846 | 9.615  | 0.068 | 0.0082 |
| FBgn0035255 | 664.062 | 38.988 | 1.145 | 0.7967 |
| FBgn0015816 | 4.132   | 0.939  | 0.107 | 0.1930 |
| FBgn0052056 | 6.766   | 1.457  | 0.157 | 0.2108 |
| FBgn0003326 | 24.700  | 4.122  | 0.344 | 0.1555 |
| FBgn0032416 | 40.325  | 5.729  | 0.407 | 0.1687 |
| FBgn0000183 | 725.098 | 19.889 | 0.273 | 0.0565 |
| FBgn0005619 | 748.147 | 22.759 | 0.346 | 0.0914 |
| FBgn0030871 | 532.414 | 9.554  | 0.086 | 0.0034 |
| FBgn0026208 | 11.657  | 1.949  | 0.163 | 0.1642 |
| FBgn0062517 | 30.676  | 3.414  | 0.190 | 0.0787 |
| FBgn0033893 | 13.164  | 2.712  | 0.279 | 0.2028 |
| FBgn0023143 | 22.777  | 1.323  | 0.038 | 0.0263 |
| FBgn0001220 | 689.582 | 12.152 | 0.107 | 0.0078 |
| FBgn0030067 | 799.657 | 14.412 | 0.130 | 0.0041 |
| FBgn0016917 | 545.818 | 15.651 | 0.224 | 0.0425 |
| FBgn0037937 | 106.485 | 4.911  | 0.113 | 0.0277 |
| FBgn0032147 | 22.783  | 3.126  | 0.214 | 0.1082 |
| FBgn0039690 | 17.403  | 2.251  | 0.146 | 0.0745 |
| FBgn0033616 | 12.175  | 2.675  | 0.294 | 0.2033 |
| FBgn0020235 | 774.661 | 16.783 | 0.182 | 0.0127 |
| FBgn0015391 | 113.900 | 4.291  | 0.081 | 0.0137 |
| FBgn0030929 | 635.704 | 15.787 | 0.196 | 0.0306 |
| FBgn0037530 | 726.614 | 17.586 | 0.213 | 0.0221 |
| FBgn0033408 | 9.903   | 2.684  | 0.364 | 0.3313 |
| FBgn0038268 | 22.552  | 2.034  | 0.092 | 0.0376 |
| FBgn0038861 | 13.492  | 4.098  | 0.622 | 0.5393 |
| FBgn0036141 | 34.529  | 4.433  | 0.285 | 0.0771 |
| FBgn0035069 | 103.519 | 5.006  | 0.121 | 0.0410 |
| FBgn0030013 | 11.864  | 2.058  | 0.178 | 0.1455 |
| FBgn0033412 | 117.700 | 7.757  | 0.256 | 0.0396 |
| FBgn0034382 | 21.023  | 6.497  | 1.004 | 0.9941 |
| FBgn0036665 | 88.134  | 8.246  | 0.386 | 0.1339 |
| FBgn0027504 | 723.345 | 20.410 | 0.288 | 0.1098 |
| FBgn0041234 | 23.641  | 5.115  | 0.553 | 0.3606 |
| FBgn0033134 | 13.831  | 1.468  | 0.078 | 0.0572 |
| FBgn0039200 | 84.449  | 4.532  | 0.122 | 0.0070 |
| FBgn0032249 | 18.685  | 4.957  | 0.657 | 0.5078 |

|             |         |        |       |        |
|-------------|---------|--------|-------|--------|
| FBgn0016685 | 571.949 | 10.501 | 0.096 | 0.0150 |
| FBgn0052557 | 706.524 | 13.298 | 0.125 | 0.0038 |
| FBgn0035468 | 104.468 | 5.847  | 0.164 | 0.0182 |
| FBgn0035806 | 42.339  | 3.199  | 0.121 | 0.0186 |
| FBgn0045035 | 634.005 | 13.824 | 0.151 | 0.0188 |
| FBgn0000479 | 716.349 | 27.478 | 0.527 | 0.2787 |
| FBgn0015801 | 794.167 | 16.169 | 0.165 | 0.0213 |
| FBgn0039722 | 835.689 | 15.348 | 0.141 | 0.0055 |
| FBgn0033454 | 774.891 | 18.015 | 0.209 | 0.0200 |
| FBgn0010433 | 18.179  | 5.829  | 0.935 | 0.9091 |
| FBgn0031571 | 21.574  | 5.443  | 0.687 | 0.5422 |
| FBgn0037248 | 686.091 | 19.097 | 0.266 | 0.0495 |
| FBgn0026259 | 12.920  | 1.454  | 0.082 | 0.0839 |
| FBgn0024887 | 552.995 | 20.935 | 0.396 | 0.1377 |
| FBgn0033815 | 70.454  | 4.634  | 0.152 | 0.0298 |
| FBgn0037942 | 640.383 | 22.160 | 0.383 | 0.1202 |
| FBgn0014462 | 87.115  | 3.656  | 0.077 | 0.0059 |
| FBgn0040963 | 17.975  | 3.130  | 0.273 | 0.1469 |
| FBgn0030037 | 674.244 | 8.292  | 0.051 | 0.0120 |
| FBgn0034570 | 612.372 | 26.791 | 0.586 | 0.3599 |
| FBgn0039023 | 28.682  | 3.068  | 0.164 | 0.0469 |
| FBgn0035104 | 13.112  | 4.573  | 0.798 | 0.7341 |
| FBgn0034926 | 22.519  | 3.328  | 0.246 | 0.0980 |
| FBgn0036450 | 33.986  | 3.362  | 0.166 | 0.0507 |
| FBgn0032477 | 11.680  | 2.265  | 0.220 | 0.1882 |
| FBgn0051100 | 864.633 | 13.538 | 0.106 | 0.0038 |
| FBgn0038046 | 94.015  | 7.413  | 0.292 | 0.1350 |
| FBgn0016070 | 16.371  | 2.129  | 0.138 | 0.0902 |
| FBgn0010704 | 14.988  | 2.648  | 0.234 | 0.1646 |
| FBgn0035490 | 704.490 | 15.034 | 0.160 | 0.0276 |
| FBgn0039531 | 576.896 | 13.384 | 0.155 | 0.0264 |
| FBgn0037723 | 163.991 | 7.180  | 0.157 | 0.0336 |
| FBgn0031393 | 16.868  | 6.008  | 1.070 | 0.9066 |
| FBgn0038666 | 727.159 | 21.015 | 0.304 | 0.0625 |
| FBgn0031646 | 9.538   | 3.683  | 0.711 | 0.6607 |
| FBgn0037533 | 70.101  | 3.281  | 0.077 | 0.0098 |
| FBgn0027563 | 783.247 | 13.339 | 0.114 | 0.0067 |
| FBgn0034797 | 19.055  | 3.211  | 0.271 | 0.1603 |
| FBgn0035280 | 107.910 | 9.235  | 0.395 | 0.1468 |
| FBgn0028470 | 72.083  | 4.869  | 0.164 | 0.0251 |
| FBgn0035880 | 10.284  | 0.770  | 0.029 | 0.0578 |
| FBgn0037979 | 736.882 | 16.079 | 0.175 | 0.0113 |
| FBgn0032750 | 81.906  | 4.195  | 0.107 | 0.0170 |
| FBgn0038854 | 752.614 | 5.355  | 0.019 | 0.0003 |
| FBgn0032261 | 17.309  | 3.091  | 0.276 | 0.1691 |
| FBgn0036134 | 12.942  | 2.527  | 0.247 | 0.1729 |
| FBgn0025802 | 20.806  | 3.169  | 0.241 | 0.1112 |
| FBgn0029778 | 26.957  | 3.112  | 0.180 | 0.0703 |
| FBgn0032838 | 201.581 | 7.386  | 0.135 | 0.0174 |
| FBgn0039150 | 124.229 | 9.810  | 0.387 | 0.1258 |
| FBgn0052210 | 43.058  | 5.868  | 0.400 | 0.1661 |
| FBgn0032661 | 753.576 | 17.508 | 0.203 | 0.0175 |
| FBgn0038842 | 21.830  | 6.494  | 0.966 | 0.9509 |
| FBgn0025635 | 266.952 | 6.773  | 0.086 | 0.0026 |

|             |         |        |       |        |
|-------------|---------|--------|-------|--------|
| FBgn0032690 | 18.831  | 3.547  | 0.334 | 0.1568 |
| FBgn0026431 | 26.244  | 3.456  | 0.228 | 0.1038 |
| FBgn0033389 | 36.639  | 2.929  | 0.117 | 0.0301 |
| FBgn0030406 | 23.994  | 3.962  | 0.327 | 0.1229 |
| FBgn0039206 | 24.085  | 3.010  | 0.188 | 0.0624 |
| FBgn0030010 | 19.011  | 2.126  | 0.119 | 0.0629 |
| FBgn0036479 | 679.434 | 20.122 | 0.298 | 0.0590 |
| FBgn0040609 | 41.099  | 4.337  | 0.229 | 0.0533 |
| FBgn0030678 | 89.946  | 4.117  | 0.094 | 0.0067 |
| FBgn0037448 | 109.630 | 7.654  | 0.267 | 0.0699 |
| FBgn0014870 | 115.882 | 3.615  | 0.056 | 0.0024 |
| FBgn0036337 | 107.057 | 3.097  | 0.045 | 0.0026 |
| FBgn0033258 | 698.111 | 22.560 | 0.365 | 0.1056 |
| FBgn0000158 | 45.346  | 4.850  | 0.259 | 0.0574 |
| FBgn0026088 | 11.842  | 3.190  | 0.430 | 0.3412 |
| FBgn0035193 | 652.451 | 15.649 | 0.188 | 0.0386 |
| FBgn0040066 | 690.157 | 16.931 | 0.208 | 0.0439 |
| FBgn0033550 | 30.984  | 3.441  | 0.191 | 0.0873 |
| FBgn0023178 | 23.103  | 2.661  | 0.153 | 0.0595 |
| FBgn0000579 | 817.116 | 10.503 | 0.067 | 0.0009 |
| FBgn0039140 | 837.246 | 12.121 | 0.088 | 0.0011 |
| FBgn0032926 | 50.800  | 3.100  | 0.095 | 0.0260 |
| FBgn0034360 | 29.372  | 3.565  | 0.216 | 0.0847 |
| FBgn0032882 | 15.750  | 3.172  | 0.319 | 0.2087 |
| FBgn0034661 | 6.038   | 1.861  | 0.287 | 0.3420 |
| FBgn0031760 | 18.085  | 3.002  | 0.249 | 0.1164 |
| FBgn0039689 | 141.381 | 5.673  | 0.114 | 0.0156 |
| FBgn0030747 | 14.859  | 1.542  | 0.080 | 0.0792 |
| FBgn0000454 | 17.485  | 1.456  | 0.061 | 0.0574 |
| FBgn0034113 | 136.658 | 8.216  | 0.247 | 0.0784 |
| FBgn0021818 | 25.272  | 2.215  | 0.097 | 0.0406 |
| FBgn0004387 | 51.589  | 3.604  | 0.126 | 0.0145 |
| FBgn0031432 | 29.219  | 7.849  | 1.054 | 0.9232 |
| FBgn0003721 | 122.661 | 4.950  | 0.100 | 0.0142 |
| FBgn0042205 | 6.791   | 2.146  | 0.339 | 0.3677 |
| FBgn0039282 | 19.849  | 5.324  | 0.714 | 0.5870 |
| FBgn0011327 | 803.608 | 7.599  | 0.036 | 0.0029 |
| FBgn0032856 | 22.344  | 3.145  | 0.221 | 0.1036 |
| FBgn0033996 | 133.680 | 13.832 | 0.716 | 0.5539 |
| FBgn0039648 | 50.469  | 4.559  | 0.206 | 0.0663 |
| FBgn0003205 | 38.966  | 3.732  | 0.179 | 0.0383 |
| FBgn0039348 | 43.694  | 4.659  | 0.248 | 0.0634 |
| FBgn0033738 | 22.830  | 2.776  | 0.169 | 0.0852 |
| FBgn0032471 | 10.432  | 2.129  | 0.217 | 0.1822 |
| FBgn0039936 | 682.108 | 17.043 | 0.213 | 0.0211 |
| FBgn0034614 | 19.393  | 2.507  | 0.162 | 0.0972 |
| FBgn0027589 | 147.746 | 8.990  | 0.274 | 0.0517 |
| FBgn0030040 | 21.731  | 3.700  | 0.315 | 0.1730 |
| FBgn0037370 | 108.486 | 7.438  | 0.255 | 0.0628 |
| FBgn0037616 | 10.979  | 3.077  | 0.431 | 0.3968 |
| FBgn0020440 | 44.820  | 5.183  | 0.300 | 0.0865 |
| FBgn0015919 | 105.900 | 7.471  | 0.264 | 0.0680 |
| FBgn0031142 | 18.385  | 2.470  | 0.166 | 0.0914 |
| FBgn0034793 | 785.278 | 20.684 | 0.272 | 0.0452 |

|             |         |        |       |        |
|-------------|---------|--------|-------|--------|
| FBgn0001977 | 602.012 | 16.814 | 0.235 | 0.0452 |
| FBgn0034726 | 818.359 | 13.036 | 0.104 | 0.0034 |
| FBgn0032787 | 47.130  | 4.021  | 0.172 | 0.0422 |
| FBgn0034352 | 36.456  | 3.666  | 0.184 | 0.0377 |
| FBgn0038329 | 21.884  | 5.041  | 0.581 | 0.4142 |
| FBgn0037430 | 676.912 | 19.124 | 0.270 | 0.1238 |
| FBgn0034229 | 38.771  | 4.350  | 0.244 | 0.0599 |
| FBgn0032634 | 38.415  | 4.749  | 0.293 | 0.1178 |
| FBgn0036455 | 23.051  | 4.217  | 0.386 | 0.2119 |
| FBgn0046999 | 16.883  | 2.856  | 0.242 | 0.1730 |
| FBgn0031740 | 27.454  | 3.879  | 0.274 | 0.1089 |
| FBgn0034367 | 75.707  | 6.795  | 0.305 | 0.0690 |
| FBgn0028694 | 43.648  | 3.750  | 0.161 | 0.0586 |
| FBgn0033935 | 41.315  | 3.386  | 0.139 | 0.0247 |
| FBgn0036557 | 20.829  | 3.981  | 0.380 | 0.1835 |
| FBgn0033208 | 53.415  | 5.398  | 0.273 | 0.0762 |
| FBgn0037749 | 33.844  | 2.807  | 0.116 | 0.0285 |
| FBgn0038504 | 17.592  | 3.129  | 0.278 | 0.1819 |
| FBgn0003380 | 16.453  | 3.768  | 0.431 | 0.2587 |
| FBgn0027501 | 27.762  | 2.576  | 0.120 | 0.0591 |
| FBgn0031035 | 24.975  | 4.077  | 0.333 | 0.1229 |
| FBgn0033740 | 795.847 | 10.951 | 0.075 | 0.0026 |
| FBgn0032032 | 20.612  | 3.781  | 0.347 | 0.1839 |
| FBgn0010622 | 893.369 | 8.079  | 0.037 | 0.0017 |
| FBgn0005654 | 848.966 | 9.961  | 0.058 | 0.0017 |
| FBgn0037419 | 879.148 | 12.109 | 0.083 | 0.0014 |
| FBgn0034543 | 760.310 | 18.689 | 0.230 | 0.0434 |
| FBgn0035103 | 14.240  | 2.665  | 0.249 | 0.1645 |
| FBgn0038327 | 17.654  | 3.076  | 0.268 | 0.1759 |
| FBgn0003300 | 65.533  | 4.384  | 0.147 | 0.0274 |
| FBgn0053513 | 10.356  | 2.396  | 0.277 | 0.2344 |
| FBgn0033960 | 200.892 | 7.147  | 0.127 | 0.0081 |
| FBgn0022343 | 177.795 | 7.157  | 0.144 | 0.0233 |
| FBgn0037814 | 14.162  | 2.455  | 0.213 | 0.1343 |
| FBgn0050269 | 32.225  | 3.772  | 0.221 | 0.0803 |
| FBgn0038488 | 766.909 | 12.419 | 0.101 | 0.0022 |
| FBgn0037901 | 19.845  | 3.686  | 0.342 | 0.1611 |
| FBgn0037378 | 9.806   | 1.233  | 0.077 | 0.0898 |
| FBgn0031098 | 798.805 | 20.322 | 0.258 | 0.0385 |
| FBgn0033962 | 41.337  | 3.479  | 0.146 | 0.0298 |
| FBgn0039846 | 31.757  | 3.907  | 0.240 | 0.0827 |
| FBgn0025618 | 23.767  | 4.710  | 0.467 | 0.2535 |
| FBgn0011224 | 19.904  | 3.528  | 0.313 | 0.1817 |
| FBgn0039488 | 16.288  | 1.778  | 0.097 | 0.0775 |
| FBgn0029868 | 250.487 | 10.298 | 0.212 | 0.0234 |
| FBgn0038951 | 9.728   | 1.349  | 0.094 | 0.1046 |
| FBgn0043791 | 55.184  | 5.627  | 0.287 | 0.0804 |
| FBgn0027583 | 31.877  | 4.830  | 0.366 | 0.1531 |
| FBgn0032955 | 45.196  | 4.430  | 0.217 | 0.0391 |
| FBgn0020250 | 24.109  | 2.669  | 0.148 | 0.0638 |
| FBgn0051637 | 27.602  | 3.841  | 0.267 | 0.0913 |
| FBgn0036691 | 24.606  | 0.952  | 0.018 | 0.0109 |
| FBgn0034033 | 762.993 | 17.471 | 0.200 | 0.0355 |
| FBgn0034110 | 16.262  | 1.619  | 0.081 | 0.0657 |

|             |         |        |       |        |
|-------------|---------|--------|-------|--------|
| FBgn0002968 | 625.151 | 19.259 | 0.297 | 0.0716 |
| FBgn0032195 | 20.494  | 4.304  | 0.452 | 0.2709 |
| FBgn0010309 | 124.364 | 6.983  | 0.196 | 0.0167 |
| FBgn0035575 | 7.313   | 2.617  | 0.468 | 0.4741 |
| FBgn0030399 | 32.899  | 5.058  | 0.389 | 0.1621 |
| FBgn0025571 | 21.433  | 5.048  | 0.594 | 0.4165 |
| FBgn0053472 | 663.757 | 15.255 | 0.175 | 0.0172 |
| FBgn0034447 | 7.667   | 1.730  | 0.195 | 0.2346 |
| FBgn0002940 | 727.317 | 24.199 | 0.403 | 0.1426 |
| FBgn0034743 | 26.485  | 5.138  | 0.498 | 0.3071 |
| FBgn0038909 | 16.583  | 3.300  | 0.328 | 0.2308 |
| FBgn0034582 | 18.827  | 2.864  | 0.218 | 0.1274 |
| FBgn0020655 | 770.841 | 14.711 | 0.140 | 0.0145 |
| FBgn0032596 | 47.662  | 4.360  | 0.199 | 0.0332 |
| FBgn0041712 | 14.726  | 2.502  | 0.212 | 0.1395 |
| FBgn0037799 | 704.207 | 30.331 | 0.653 | 0.4569 |
| FBgn0035449 | 24.336  | 3.192  | 0.209 | 0.0880 |
| FBgn0039411 | 23.736  | 6.734  | 0.955 | 0.9375 |
| FBgn0036996 | 30.812  | 3.175  | 0.164 | 0.0710 |
| FBgn0033266 | 25.550  | 2.542  | 0.126 | 0.0517 |
| FBgn0027602 | 99.287  | 5.209  | 0.137 | 0.0094 |
| FBgn0034887 | 766.614 | 18.120 | 0.214 | 0.0232 |
| FBgn0051357 | 616.678 | 17.020 | 0.235 | 0.0944 |
| FBgn0010651 | 10.779  | 3.133  | 0.455 | 0.3847 |
| FBgn0034938 | 14.393  | 1.909  | 0.127 | 0.0957 |
| FBgn0033581 | 11.625  | 1.302  | 0.073 | 0.0708 |
| FBgn0031118 | 18.331  | 4.809  | 0.631 | 0.4745 |
| FBgn0000061 | 39.314  | 6.716  | 0.574 | 0.3555 |
| FBgn0031226 | 38.462  | 8.532  | 0.946 | 0.9276 |
| FBgn0035402 | 177.249 | 6.280  | 0.111 | 0.0185 |
| FBgn0037683 | 22.177  | 2.999  | 0.203 | 0.1052 |
| FBgn0053100 | 15.922  | 3.183  | 0.318 | 0.1757 |
| FBgn0035768 | 61.015  | 3.579  | 0.105 | 0.0104 |
| FBgn0013973 | 639.398 | 16.242 | 0.206 | 0.0191 |
| FBgn0030998 | 20.589  | 1.081  | 0.028 | 0.0210 |
| FBgn0035799 | 12.510  | 3.420  | 0.467 | 0.3579 |
| FBgn0036558 | 36.429  | 4.807  | 0.317 | 0.0921 |
| FBgn0039183 | 31.627  | 2.469  | 0.096 | 0.0219 |
| FBgn0003187 | 32.540  | 1.600  | 0.039 | 0.0144 |
| FBgn0037556 | 43.096  | 3.743  | 0.163 | 0.0309 |
| FBgn0038947 | 723.060 | 13.574 | 0.127 | 0.0058 |
| FBgn0033043 | 23.654  | 5.661  | 0.678 | 0.5271 |
| FBgn0040513 | 39.222  | 5.611  | 0.401 | 0.1905 |
| FBgn0040651 | 773.974 | 17.820 | 0.205 | 0.0190 |
| FBgn0030975 | 776.428 | 24.902 | 0.399 | 0.1361 |
| FBgn0036008 | 316.922 | 12.518 | 0.247 | 0.0374 |
| FBgn0038833 | 88.447  | 5.817  | 0.191 | 0.0171 |
| FBgn0051087 | 24.783  | 3.158  | 0.201 | 0.0723 |
| FBgn0032940 | 41.966  | 3.654  | 0.159 | 0.0274 |
| FBgn0052306 | 751.410 | 15.384 | 0.157 | 0.0080 |
| FBgn0015924 | 23.013  | 2.072  | 0.093 | 0.0475 |
| FBgn0034945 | 28.227  | 4.121  | 0.301 | 0.1138 |
| FBgn0029914 | 621.704 | 12.759 | 0.131 | 0.0097 |
| FBgn0027610 | 27.998  | 2.171  | 0.084 | 0.0442 |

|             |         |        |       |        |
|-------------|---------|--------|-------|--------|
| FBgn0026160 | 23.334  | 1.196  | 0.031 | 0.0216 |
| FBgn0053302 | 716.956 | 17.488 | 0.213 | 0.0474 |
| FBgn0030089 | 12.334  | 3.598  | 0.525 | 0.4023 |
| FBgn0031753 | 19.113  | 2.379  | 0.148 | 0.0701 |
| FBgn0051191 | 167.571 | 15.662 | 0.732 | 0.5790 |
| FBgn0028408 | 17.138  | 3.309  | 0.319 | 0.1897 |
| FBgn0033179 | 10.895  | 1.125  | 0.058 | 0.0916 |
| FBgn0035514 | 20.843  | 2.671  | 0.171 | 0.0921 |
| FBgn0036614 | 12.511  | 3.046  | 0.371 | 0.2647 |
| FBgn0021906 | 558.202 | 19.163 | 0.329 | 0.0789 |
| FBgn0011655 | 666.997 | 19.551 | 0.287 | 0.0769 |
| FBgn0038318 | 25.828  | 4.216  | 0.344 | 0.1348 |
| FBgn0038934 | 86.061  | 6.002  | 0.209 | 0.0252 |
| FBgn0050115 | 110.953 | 5.540  | 0.138 | 0.0111 |
| FBgn0036454 | 35.445  | 2.975  | 0.125 | 0.0263 |
| FBgn0026149 | 79.159  | 10.290 | 0.669 | 0.5698 |
| FBgn0052369 | 533.536 | 12.206 | 0.140 | 0.0097 |
| FBgn0029924 | 12.410  | 4.135  | 0.689 | 0.5982 |
| FBgn0032973 | 20.458  | 3.941  | 0.380 | 0.1812 |
| FBgn0022268 | 154.177 | 5.534  | 0.099 | 0.0040 |
| FBgn0004834 | 79.348  | 3.658  | 0.084 | 0.0129 |
| FBgn0028691 | 39.817  | 4.028  | 0.204 | 0.0410 |
| FBgn0000099 | 17.501  | 3.827  | 0.418 | 0.2888 |
| FBgn0033890 | 37.671  | 2.556  | 0.087 | 0.0218 |
| FBgn0020912 | 718.539 | 16.825 | 0.197 | 0.0166 |
| FBgn0053260 | 674.350 | 16.910 | 0.212 | 0.0275 |
| FBgn0046247 | 20.968  | 4.437  | 0.469 | 0.2636 |
| FBgn0040336 | 775.848 | 17.773 | 0.204 | 0.0194 |
| FBgn0036716 | 16.827  | 3.901  | 0.452 | 0.3113 |
| FBgn0037662 | 2.969   | 1.821  | 0.558 | 0.6506 |
| FBgn0037807 | 248.105 | 10.692 | 0.230 | 0.0555 |
| FBgn0030243 | 788.089 | 21.472 | 0.293 | 0.0559 |
| FBgn0024947 | 46.076  | 2.651  | 0.076 | 0.0143 |
| FBgn0026015 | 43.203  | 4.334  | 0.217 | 0.0359 |
| FBgn0035156 | 850.454 | 13.920 | 0.114 | 0.0067 |
| FBgn0051345 | 9.043   | 5.154  | 1.468 | 0.5244 |
| FBgn0029092 | 85.583  | 4.254  | 0.106 | 0.0217 |
| FBgn0039335 | 32.721  | 3.169  | 0.153 | 0.0388 |
| FBgn0041096 | 14.551  | 1.964  | 0.133 | 0.1056 |
| FBgn0038454 | 15.044  | 3.202  | 0.341 | 0.2189 |
| FBgn0022987 | 611.272 | 21.080 | 0.363 | 0.1090 |
| FBgn0034840 | 702.511 | 19.452 | 0.269 | 0.0605 |
| FBgn0026326 | 14.616  | 0.622  | 0.013 | 0.0262 |
| FBgn0036677 | 33.149  | 3.630  | 0.199 | 0.0514 |
| FBgn0028936 | 10.091  | 1.849  | 0.169 | 0.1779 |
| FBgn0034271 | 32.142  | 2.391  | 0.089 | 0.0356 |
| FBgn0001147 | 813.104 | 21.767 | 0.291 | 0.0553 |
| FBgn0032435 | 17.225  | 2.618  | 0.199 | 0.1185 |
| FBgn0039881 | 13.457  | 2.595  | 0.250 | 0.2152 |
| FBgn0038354 | 466.266 | 15.282 | 0.250 | 0.0530 |
| FBgn0031681 | 23.622  | 2.290  | 0.111 | 0.0601 |
| FBgn0037664 | 730.290 | 30.209 | 0.625 | 0.4155 |
| FBgn0039780 | 752.386 | 10.964 | 0.080 | 0.0149 |
| FBgn0046114 | 24.269  | 4.134  | 0.352 | 0.1522 |



|             |         |        |       |        |
|-------------|---------|--------|-------|--------|
| FBgn0002774 | 18.409  | 1.842  | 0.092 | 0.0559 |
| FBgn0005655 | 15.783  | 2.414  | 0.185 | 0.1288 |
| FBgn0001203 | 16.760  | 1.023  | 0.031 | 0.0374 |
| FBgn0035176 | 776.100 | 18.666 | 0.224 | 0.0249 |
| FBgn0037242 | 15.339  | 2.638  | 0.227 | 0.1738 |
| FBgn0031004 | 17.236  | 3.492  | 0.354 | 0.2492 |
| FBgn0030228 | 41.952  | 5.300  | 0.335 | 0.1139 |
| FBgn0033427 | 36.793  | 4.756  | 0.307 | 0.1185 |
| FBgn0000139 | 13.502  | 1.950  | 0.141 | 0.1239 |
| FBgn0039675 | 17.617  | 4.287  | 0.522 | 0.3572 |
| FBgn0038042 | 13.775  | 3.606  | 0.472 | 0.3479 |
| FBgn0004880 | 34.261  | 3.129  | 0.143 | 0.0278 |
| FBgn0025634 | 18.455  | 3.271  | 0.290 | 0.1710 |
| FBgn0033752 | 22.279  | 4.404  | 0.435 | 0.2209 |
| FBgn0037030 | 125.115 | 7.783  | 0.242 | 0.0436 |
| FBgn0005596 | 17.622  | 2.803  | 0.223 | 0.1038 |
| FBgn0011570 | 35.311  | 3.578  | 0.181 | 0.0669 |
| FBgn0036725 | 844.591 | 18.961 | 0.213 | 0.0211 |
| FBgn0035110 | 42.694  | 2.105  | 0.052 | 0.0205 |
| FBgn0032809 | 17.734  | 3.929  | 0.435 | 0.2661 |
| FBgn0036205 | 12.989  | 2.888  | 0.321 | 0.2345 |
| FBgn0032393 | 17.454  | 1.770  | 0.090 | 0.0618 |
| FBgn0035149 | 727.300 | 21.498 | 0.318 | 0.0814 |
| FBgn0040294 | 775.514 | 18.184 | 0.213 | 0.0209 |
| FBgn0010877 | 7.572   | 1.685  | 0.187 | 0.2250 |
| FBgn0002413 | 29.826  | 2.696  | 0.122 | 0.0566 |
| FBgn0052296 | 19.518  | 3.674  | 0.346 | 0.1619 |
| FBgn0029722 | 759.873 | 12.669 | 0.106 | 0.0096 |
| FBgn0031501 | 877.789 | 15.835 | 0.143 | 0.0058 |
| FBgn0051140 | 152.454 | 8.478  | 0.236 | 0.0354 |
| FBgn0004862 | 41.720  | 5.930  | 0.421 | 0.1821 |
| FBgn0025724 | 625.420 | 6.074  | 0.029 | 0.0055 |
| FBgn0034535 | 28.705  | 3.181  | 0.176 | 0.0750 |
| FBgn0050349 | 710.655 | 12.874 | 0.117 | 0.0078 |
| FBgn0024232 | 684.499 | 19.687 | 0.283 | 0.0685 |
| FBgn0039529 | 47.134  | 1.748  | 0.032 | 0.0110 |
| FBgn0029783 | 15.446  | 2.462  | 0.196 | 0.1565 |
| FBgn0036759 | 3.849   | 1.578  | 0.323 | 0.4213 |
| FBgn0028479 | 16.458  | 1.635  | 0.081 | 0.0572 |
| FBgn0035619 | 25.841  | 3.875  | 0.291 | 0.1075 |
| FBgn0025352 | 15.495  | 2.061  | 0.137 | 0.0948 |
| FBgn0035931 | 70.335  | 7.197  | 0.368 | 0.1323 |
| FBgn0032677 | 19.486  | 3.473  | 0.309 | 0.1450 |
| FBgn0034030 | 4.911   | 1.363  | 0.189 | 0.2592 |
| FBgn0015591 | 9.885   | 2.568  | 0.333 | 0.2970 |
| FBgn0039115 | 507.285 | 20.444 | 0.412 | 0.1478 |
| FBgn0025519 | 112.124 | 6.064  | 0.164 | 0.0163 |
| FBgn0037342 | 743.088 | 14.687 | 0.145 | 0.0141 |
| FBgn0002577 | 44.119  | 5.484  | 0.341 | 0.1507 |
| FBgn0034061 | 36.836  | 5.959  | 0.482 | 0.2406 |
| FBgn0031495 | 698.938 | 17.671 | 0.223 | 0.0622 |
| FBgn0037327 | 832.105 | 13.557 | 0.110 | 0.0058 |
| FBgn0000486 | 739.722 | 7.965  | 0.043 | 0.0066 |
| FBgn0050120 | 34.502  | 5.855  | 0.497 | 0.2712 |

|             |         |        |       |        |
|-------------|---------|--------|-------|--------|
| FBgn0013997 | 28.923  | 4.024  | 0.280 | 0.1085 |
| FBgn0004390 | 793.784 | 17.422 | 0.191 | 0.0143 |
| FBgn0053958 | 616.604 | 11.072 | 0.099 | 0.0016 |
| FBgn0032100 | 755.403 | 28.344 | 0.532 | 0.2848 |
| FBgn0034517 | 31.224  | 2.753  | 0.121 | 0.0474 |
| FBgn0030063 | 650.655 | 16.378 | 0.206 | 0.0245 |
| FBgn0027865 | 905.744 | 11.898 | 0.078 | 0.0038 |
| FBgn0037379 | 9.409   | 2.157  | 0.247 | 0.2359 |
| FBgn0034350 | 5.783   | 1.406  | 0.171 | 0.2440 |
| FBgn0035754 | 5.569   | 2.059  | 0.381 | 0.4237 |
| FBgn0053143 | 10.221  | 2.855  | 0.399 | 0.3257 |
| FBgn0035043 | 765.852 | 17.280 | 0.195 | 0.0567 |
| FBgn0039435 | 20.207  | 4.106  | 0.417 | 0.2220 |
| FBgn0032072 | 19.202  | 3.175  | 0.263 | 0.1705 |
| FBgn0031456 | 33.413  | 1.151  | 0.020 | 0.0129 |
| FBgn0022153 | 694.447 | 12.871 | 0.119 | 0.0096 |
| FBgn0037603 | 23.710  | 4.150  | 0.363 | 0.1790 |
| FBgn0032035 | 849.485 | 8.202  | 0.040 | 0.0083 |
| FBgn0039809 | 823.457 | 16.620 | 0.168 | 0.0143 |
| FBgn0031384 | 18.269  | 2.584  | 0.183 | 0.0915 |
| FBgn0011744 | 789.050 | 9.781  | 0.061 | 0.0013 |
| FBgn0037626 | 15.189  | 3.254  | 0.348 | 0.2209 |
| FBgn0003892 | 47.642  | 7.065  | 0.524 | 0.3126 |
| FBgn0026150 | 16.354  | 2.699  | 0.223 | 0.1567 |
| FBgn0027658 | 30.055  | 3.331  | 0.185 | 0.0549 |
| FBgn0039064 | 103.530 | 10.057 | 0.488 | 0.2331 |
| FBgn0030327 | 688.290 | 14.994 | 0.163 | 0.0266 |
| FBgn0030842 | 27.273  | 3.348  | 0.206 | 0.0833 |
| FBgn0025640 | 15.348  | 2.952  | 0.284 | 0.2003 |
| FBgn0034697 | 39.564  | 1.377  | 0.024 | 0.0117 |
| FBgn0040279 | 105.584 | 5.885  | 0.164 | 0.0409 |
| FBgn0039009 | 19.081  | 4.087  | 0.438 | 0.2931 |
| FBgn0039696 | 17.733  | 1.987  | 0.111 | 0.0857 |
| FBgn0031227 | 8.395   | 1.912  | 0.218 | 0.2312 |
| FBgn0037592 | 17.358  | 2.751  | 0.218 | 0.1145 |
| FBgn0037856 | 726.380 | 9.377  | 0.061 | 0.0007 |
| FBgn0004903 | 805.129 | 32.171 | 0.643 | 0.4406 |
| FBgn0039505 | 119.521 | 6.789  | 0.193 | 0.0197 |
| FBgn0010612 | 637.117 | 16.110 | 0.204 | 0.0182 |
| FBgn0002592 | 17.318  | 5.019  | 0.727 | 0.6152 |
| FBgn0035308 | 16.597  | 3.880  | 0.454 | 0.2936 |
| FBgn0032553 | 32.036  | 3.191  | 0.159 | 0.0643 |
| FBgn0038360 | 649.527 | 10.921 | 0.092 | 0.0121 |
| FBgn0038579 | 31.095  | 4.940  | 0.392 | 0.1970 |
| FBgn0016132 | 14.671  | 2.549  | 0.222 | 0.1378 |
| FBgn0020018 | 17.091  | 2.198  | 0.141 | 0.1093 |
| FBgn0038760 | 105.552 | 12.768 | 0.772 | 0.6432 |
| FBgn0030551 | 13.798  | 2.274  | 0.187 | 0.1319 |
| FBgn0034724 | 29.656  | 3.716  | 0.233 | 0.0935 |
| FBgn0037728 | 311.530 | 12.232 | 0.240 | 0.0504 |
| FBgn0001179 | 829.916 | 10.836 | 0.071 | 0.0041 |
| FBgn0020388 | 9.853   | 2.208  | 0.247 | 0.2238 |
| FBgn0039570 | 15.864  | 5.089  | 0.816 | 0.7485 |
| FBgn0005771 | 9.025   | 2.914  | 0.470 | 0.4366 |

|             |         |        |       |        |
|-------------|---------|--------|-------|--------|
| FBgn0034788 | 704.094 | 12.634 | 0.113 | 0.0026 |
| FBgn0034513 | 38.259  | 4.274  | 0.239 | 0.0494 |
| FBgn0004875 | 583.757 | 27.654 | 0.655 | 0.4758 |
| FBgn0021768 | 51.698  | 2.513  | 0.061 | 0.0133 |
| FBgn0030004 | 24.828  | 2.963  | 0.177 | 0.0863 |
| FBgn0051368 | 21.550  | 3.331  | 0.257 | 0.1192 |
| FBgn0039728 | 18.551  | 3.468  | 0.324 | 0.2015 |
| FBgn0029909 | 24.058  | 4.668  | 0.453 | 0.2547 |
| FBgn0038584 | 106.823 | 4.634  | 0.100 | 0.0059 |
| FBgn0034253 | 911.205 | 10.658 | 0.062 | 0.0007 |
| FBgn0030011 | 9.159   | 1.256  | 0.086 | 0.1222 |
| FBgn0033248 | 730.420 | 19.004 | 0.247 | 0.0372 |
| FBgn0010424 | 710.914 | 21.379 | 0.321 | 0.1150 |
| FBgn0031732 | 658.987 | 18.824 | 0.269 | 0.0733 |
| FBgn0032813 | 206.121 | 8.357  | 0.169 | 0.0518 |
| FBgn0025725 | 9.874   | 1.489  | 0.112 | 0.1399 |
| FBgn0038583 | 24.280  | 2.208  | 0.100 | 0.0487 |
| FBgn0039461 | 20.097  | 3.932  | 0.385 | 0.2035 |
| FBgn0030359 | 583.545 | 15.492 | 0.206 | 0.0265 |
| FBgn0035688 | 92.370  | 5.720  | 0.177 | 0.0588 |
| FBgn0034751 | 15.983  | 1.920  | 0.115 | 0.1049 |
| FBgn0032495 | 818.423 | 15.012 | 0.138 | 0.0073 |
| FBgn0034430 | 18.850  | 2.225  | 0.131 | 0.0680 |
| FBgn0033737 | 52.914  | 3.604  | 0.123 | 0.0154 |
| FBgn0035948 | 14.008  | 2.788  | 0.277 | 0.2155 |
| FBgn0000283 | 59.342  | 4.480  | 0.169 | 0.0576 |
| FBgn0004888 | 33.419  | 2.276  | 0.077 | 0.0409 |
| FBgn0001222 | 13.858  | 2.520  | 0.229 | 0.1614 |
| FBgn0033210 | 684.731 | 13.608 | 0.135 | 0.0073 |
| FBgn0033633 | 27.768  | 2.820  | 0.143 | 0.0409 |
| FBgn0036660 | 14.329  | 2.551  | 0.227 | 0.1637 |
| FBgn0033140 | 28.010  | 2.752  | 0.135 | 0.0389 |
| FBgn0015296 | 747.977 | 10.734 | 0.077 | 0.0022 |
| FBgn0037580 | 29.666  | 3.340  | 0.188 | 0.0770 |
| FBgn0031126 | 5.876   | 1.596  | 0.217 | 0.2646 |
| FBgn0034183 | 17.669  | 1.852  | 0.097 | 0.0623 |
| FBgn0034687 | 36.281  | 2.745  | 0.104 | 0.0249 |
| FBgn0010638 | 36.018  | 5.059  | 0.355 | 0.1711 |
| FBgn0052554 | 15.104  | 2.373  | 0.186 | 0.1325 |
| FBgn0051481 | 833.141 | 17.417 | 0.182 | 0.0128 |
| FBgn0011232 | 819.024 | 12.997 | 0.103 | 0.0041 |
| FBgn0033109 | 25.265  | 3.240  | 0.208 | 0.0617 |
| FBgn0033842 | 145.892 | 8.004  | 0.220 | 0.0315 |
| FBgn0037256 | 11.939  | 2.456  | 0.253 | 0.1951 |
| FBgn0028570 | 10.349  | 5.545  | 1.485 | 0.4894 |
| FBgn0026181 | 732.630 | 16.566 | 0.187 | 0.0140 |
| FBgn0033166 | 71.859  | 4.243  | 0.125 | 0.0200 |
| FBgn0040968 | 743.089 | 16.895 | 0.192 | 0.0152 |
| FBgn0038180 | 35.112  | 6.541  | 0.609 | 0.4241 |
| FBgn0034961 | 11.197  | 4.044  | 0.730 | 0.6606 |
| FBgn0033085 | 794.013 | 14.010 | 0.124 | 0.0157 |
| FBgn0026402 | 20.289  | 3.755  | 0.348 | 0.1999 |
| FBgn0038632 | 96.933  | 3.950  | 0.080 | 0.0170 |
| FBgn0032699 | 734.635 | 16.058 | 0.176 | 0.0344 |

|             |         |        |       |        |
|-------------|---------|--------|-------|--------|
| FBgn0053545 | 26.202  | 2.715  | 0.141 | 0.0528 |
| FBgn0035047 | 58.054  | 5.977  | 0.308 | 0.0846 |
| FBgn0037703 | 48.150  | 3.924  | 0.160 | 0.0292 |
| FBgn0030460 | 65.123  | 5.609  | 0.242 | 0.0586 |
| FBgn0032821 | 712.304 | 26.039 | 0.476 | 0.2113 |
| FBgn0026323 | 10.318  | 1.941  | 0.183 | 0.1714 |
| FBgn0031657 | 20.313  | 1.712  | 0.072 | 0.0393 |
| FBgn0028534 | 5.654   | 3.416  | 1.032 | 0.9700 |
| FBgn0015075 | 744.969 | 17.778 | 0.212 | 0.0318 |
| FBgn0035876 | 26.089  | 4.549  | 0.397 | 0.1713 |
| FBgn0027914 | 773.591 | 14.650 | 0.139 | 0.0084 |
| FBgn0039425 | 21.168  | 3.724  | 0.328 | 0.1628 |
| FBgn0039402 | 18.573  | 1.952  | 0.103 | 0.0710 |
| FBgn0020513 | 19.892  | 2.033  | 0.104 | 0.0664 |
| FBgn0050499 | 28.321  | 2.327  | 0.096 | 0.0372 |
| FBgn0050394 | 711.917 | 19.309 | 0.262 | 0.0401 |
| FBgn0032479 | 31.849  | 4.514  | 0.320 | 0.1383 |
| FBgn0001235 | 698.239 | 30.724 | 0.676 | 0.4912 |
| FBgn0031403 | 7.339   | 0.674  | 0.031 | 0.0699 |
| FBgn0035410 | 23.205  | 3.194  | 0.220 | 0.1132 |
| FBgn0030305 | 24.530  | 4.060  | 0.336 | 0.1779 |
| FBgn0002985 | 786.508 | 15.044 | 0.144 | 0.0059 |
| FBgn0031225 | 21.326  | 3.503  | 0.288 | 0.1573 |
| FBgn0029937 | 44.027  | 4.149  | 0.195 | 0.0527 |
| FBgn0033507 | 638.250 | 16.215 | 0.206 | 0.0225 |
| FBgn0033604 | 5.173   | 2.282  | 0.503 | 0.5449 |
| FBgn0024250 | 9.452   | 3.144  | 0.523 | 0.4423 |
| FBgn0037472 | 670.669 | 15.760 | 0.185 | 0.0769 |
| FBgn0031580 | 11.951  | 1.903  | 0.152 | 0.1498 |
| FBgn0028789 | 17.831  | 4.131  | 0.478 | 0.2927 |
| FBgn0052133 | 27.710  | 3.668  | 0.243 | 0.0883 |
| FBgn0028662 | 7.554   | 0.969  | 0.062 | 0.1033 |
| FBgn0028529 | 800.828 | 12.842 | 0.103 | 0.0028 |
| FBgn0033544 | 22.825  | 2.821  | 0.174 | 0.0760 |
| FBgn0029714 | 22.707  | 2.344  | 0.121 | 0.0578 |
| FBgn0032760 | 885.531 | 6.674  | 0.025 | 0.0045 |
| FBgn0032361 | 853.365 | 15.008 | 0.132 | 0.0058 |
| FBgn0033265 | 22.713  | 1.496  | 0.049 | 0.0227 |
| FBgn0034138 | 611.471 | 27.730 | 0.629 | 0.4199 |
| FBgn0040250 | 10.510  | 2.264  | 0.244 | 0.2147 |
| FBgn0036300 | 5.744   | 1.430  | 0.178 | 0.2358 |
| FBgn0039741 | 16.693  | 3.522  | 0.372 | 0.1982 |
| FBgn0038659 | 812.150 | 11.463 | 0.081 | 0.0118 |
| FBgn0036715 | 18.598  | 2.177  | 0.127 | 0.0666 |
| FBgn0015754 | 778.865 | 15.471 | 0.154 | 0.0189 |
| FBgn0031260 | 10.316  | 1.268  | 0.078 | 0.1000 |
| FBgn0037234 | 26.952  | 3.630  | 0.244 | 0.0728 |
| FBgn0037332 | 114.612 | 3.687  | 0.059 | 0.0102 |
| FBgn0035131 | 18.215  | 3.304  | 0.300 | 0.1483 |
| FBgn0032513 | 11.889  | 1.654  | 0.115 | 0.1232 |
| FBgn0035111 | 52.445  | 2.722  | 0.071 | 0.0141 |
| FBgn0032478 | 9.508   | 2.139  | 0.241 | 0.2140 |
| FBgn0037998 | 18.239  | 2.530  | 0.176 | 0.0863 |
| FBgn0003717 | 17.251  | 2.559  | 0.190 | 0.1070 |

|             |         |        |       |        |
|-------------|---------|--------|-------|--------|
| FBgn0004391 | 61.563  | 3.373  | 0.092 | 0.0354 |
| FBgn0053506 | 31.746  | 1.855  | 0.054 | 0.0213 |
| FBgn0033342 | 26.210  | 1.441  | 0.040 | 0.0202 |
| FBgn0032706 | 18.086  | 3.565  | 0.351 | 0.2076 |
| FBgn0000382 | 17.875  | 1.275  | 0.045 | 0.0485 |
| FBgn0034908 | 24.250  | 3.516  | 0.255 | 0.1318 |
| FBgn0037647 | 8.089   | 2.233  | 0.308 | 0.3062 |
| FBgn0004456 | 764.677 | 22.735 | 0.338 | 0.0893 |
| FBgn0032923 | 56.040  | 2.450  | 0.054 | 0.0125 |
| FBgn0011285 | 12.888  | 3.764  | 0.550 | 0.4605 |
| FBgn0032314 | 28.042  | 4.583  | 0.375 | 0.1588 |
| FBgn0033316 | 11.934  | 2.036  | 0.174 | 0.1439 |
| FBgn0034313 | 444.943 | 13.412 | 0.202 | 0.0699 |
| FBgn0039795 | 24.786  | 4.812  | 0.467 | 0.2536 |
| FBgn0039454 | 617.741 | 16.244 | 0.214 | 0.0213 |
| FBgn0011701 | 77.277  | 6.004  | 0.233 | 0.0373 |
| FBgn0036734 | 7.572   | 1.722  | 0.196 | 0.2130 |
| FBgn0022770 | 8.186   | 2.034  | 0.253 | 0.2702 |
| FBgn0033867 | 98.134  | 8.680  | 0.384 | 0.1347 |
| FBgn0040222 | 821.598 | 10.114 | 0.062 | 0.0006 |
| FBgn0041156 | 105.605 | 5.719  | 0.155 | 0.0134 |
| FBgn0030156 | 27.221  | 3.608  | 0.239 | 0.0825 |
| FBgn0039357 | 120.602 | 2.760  | 0.032 | 0.0023 |
| FBgn0037817 | 18.509  | 4.482  | 0.543 | 0.3626 |
| FBgn0038130 | 67.174  | 14.388 | 1.541 | 0.3885 |
| FBgn0024234 | 12.250  | 4.257  | 0.740 | 0.6528 |
| FBgn0053178 | 767.884 | 14.609 | 0.139 | 0.0334 |
| FBgn0063485 | 33.037  | 3.061  | 0.142 | 0.0290 |
| FBgn0035648 | 727.262 | 28.313 | 0.551 | 0.3104 |
| FBgn0015247 | 20.141  | 2.559  | 0.163 | 0.0982 |
| FBgn0037469 | 14.494  | 2.884  | 0.287 | 0.1716 |
| FBgn0001297 | 129.382 | 4.055  | 0.064 | 0.0022 |
| FBgn0038803 | 166.192 | 5.458  | 0.090 | 0.0034 |
| FBgn0034246 | 292.266 | 11.447 | 0.224 | 0.0377 |
| FBgn0062449 | 37.484  | 4.190  | 0.234 | 0.0850 |
| FBgn0016920 | 11.467  | 2.553  | 0.284 | 0.2290 |
| FBgn0003495 | 726.365 | 20.427 | 0.287 | 0.0617 |
| FBgn0017551 | 14.878  | 2.574  | 0.223 | 0.1535 |
| FBgn0004873 | 853.494 | 11.314 | 0.075 | 0.0043 |
| FBgn0030034 | 187.234 | 8.108  | 0.176 | 0.0114 |
| FBgn0050403 | 23.281  | 5.356  | 0.616 | 0.4367 |
| FBgn0033699 | 816.975 | 32.637 | 0.652 | 0.4550 |
| FBgn0002936 | 562.866 | 11.453 | 0.117 | 0.0064 |
| FBgn0039969 | 666.798 | 23.157 | 0.402 | 0.1388 |
| FBgn0034897 | 11.466  | 1.194  | 0.062 | 0.0679 |
| FBgn0051751 | 41.955  | 2.731  | 0.089 | 0.0330 |
| FBgn0034753 | 26.274  | 3.134  | 0.187 | 0.0923 |
| FBgn0028833 | 8.050   | 2.268  | 0.320 | 0.3294 |
| FBgn0034497 | 837.146 | 21.902 | 0.287 | 0.0525 |
| FBgn0031951 | 18.490  | 2.312  | 0.145 | 0.0985 |
| FBgn0037977 | 41.053  | 2.667  | 0.087 | 0.0176 |
| FBgn0035133 | 13.512  | 3.395  | 0.427 | 0.3181 |
| FBgn0003655 | 846.406 | 10.391 | 0.064 | 0.0005 |
| FBgn0027515 | 739.780 | 8.637  | 0.050 | 0.0021 |

|             |         |        |       |        |
|-------------|---------|--------|-------|--------|
| FBgn0038014 | 661.715 | 17.481 | 0.231 | 0.0300 |
| FBgn0033460 | 106.670 | 8.931  | 0.374 | 0.1176 |
| FBgn0001992 | 48.035  | 5.587  | 0.325 | 0.0949 |
| FBgn0035495 | 789.110 | 14.493 | 0.133 | 0.0144 |
| FBgn0043044 | 20.019  | 1.959  | 0.096 | 0.0737 |
| FBgn0037569 | 16.548  | 2.710  | 0.222 | 0.1327 |
| FBgn0034564 | 107.143 | 4.985  | 0.116 | 0.0197 |
| FBgn0035890 | 823.149 | 23.230 | 0.328 | 0.0781 |
| FBgn0030081 | 172.724 | 8.857  | 0.227 | 0.0260 |
| FBgn0032818 | 94.910  | 6.293  | 0.209 | 0.0213 |
| FBgn0037019 | 211.428 | 10.557 | 0.264 | 0.0413 |
| FBgn0011661 | 104.334 | 4.621  | 0.102 | 0.0119 |
| FBgn0025680 | 887.906 | 16.954 | 0.162 | 0.0087 |
| FBgn0032668 | 711.528 | 21.282 | 0.318 | 0.0717 |
| FBgn0038030 | 49.701  | 6.414  | 0.414 | 0.1953 |
| FBgn0027348 | 36.923  | 3.578  | 0.173 | 0.0428 |
| FBgn0034086 | 810.974 | 16.165 | 0.161 | 0.0086 |
| FBgn0040394 | 15.798  | 1.864  | 0.110 | 0.0748 |
| FBgn0013323 | 21.656  | 5.396  | 0.672 | 0.5175 |
| FBgn0028979 | 21.205  | 4.544  | 0.487 | 0.2696 |
| FBgn0052693 | 5.819   | 3.081  | 0.816 | 0.8181 |
| FBgn0052461 | 37.141  | 7.109  | 0.680 | 0.5184 |
| FBgn0031562 | 17.942  | 3.791  | 0.400 | 0.2243 |
| FBgn0020372 | 595.882 | 17.160 | 0.247 | 0.0513 |
| FBgn0035122 | 17.879  | 2.501  | 0.175 | 0.0916 |
| FBgn0033083 | 94.697  | 4.355  | 0.100 | 0.0184 |
| FBgn0014879 | 25.919  | 2.805  | 0.152 | 0.0622 |
| FBgn0034301 | 663.016 | 15.994 | 0.193 | 0.0154 |
| FBgn0037526 | 21.830  | 2.643  | 0.160 | 0.0734 |
| FBgn0035753 | 16.791  | 2.575  | 0.198 | 0.1548 |
| FBgn0036493 | 30.122  | 4.054  | 0.273 | 0.0954 |
| FBgn0041145 | 16.077  | 2.947  | 0.270 | 0.1512 |
| FBgn0030323 | 472.914 | 8.738  | 0.081 | 0.0021 |
| FBgn0031600 | 734.024 | 14.881 | 0.151 | 0.0258 |
| FBgn0035761 | 12.101  | 1.772  | 0.130 | 0.1343 |
| FBgn0038201 | 780.630 | 12.642 | 0.102 | 0.0059 |
| FBgn0031418 | 20.520  | 3.608  | 0.317 | 0.1682 |
| FBgn0038606 | 17.771  | 4.184  | 0.493 | 0.3129 |
| FBgn0034573 | 74.266  | 2.619  | 0.046 | 0.0054 |
| FBgn0000150 | 55.742  | 4.163  | 0.155 | 0.0394 |
| FBgn0034617 | 11.453  | 2.620  | 0.300 | 0.2209 |
| FBgn0035482 | 706.425 | 24.502 | 0.425 | 0.1607 |
| FBgn0030584 | 37.956  | 8.167  | 0.879 | 0.8156 |
| FBgn0036179 | 680.495 | 29.036 | 0.619 | 0.4058 |
| FBgn0020439 | 127.308 | 3.600  | 0.051 | 0.0024 |
| FBgn0052638 | 750.348 | 13.985 | 0.130 | 0.0074 |
| FBgn0032088 | 25.696  | 5.918  | 0.681 | 0.5301 |
| FBgn0039227 | 660.702 | 19.480 | 0.287 | 0.0578 |
| FBgn0004394 | 765.031 | 23.398 | 0.358 | 0.1001 |
| FBgn0038234 | 11.490  | 3.518  | 0.539 | 0.4460 |
| FBgn0034869 | 816.951 | 15.992 | 0.157 | 0.0148 |
| FBgn0039760 | 745.053 | 28.857 | 0.559 | 0.3205 |
| FBgn0035084 | 63.544  | 6.561  | 0.339 | 0.1205 |
| FBgn0036811 | 30.042  | 3.547  | 0.209 | 0.0933 |

|             |         |        |       |        |
|-------------|---------|--------|-------|--------|
| FBgn0033679 | 13.442  | 1.552  | 0.090 | 0.0981 |
| FBgn0053288 | 29.304  | 5.470  | 0.511 | 0.3082 |
| FBgn0040208 | 25.588  | 2.069  | 0.084 | 0.0450 |
| FBgn0034717 | 10.358  | 2.480  | 0.297 | 0.2646 |
| FBgn0031430 | 791.132 | 14.318 | 0.130 | 0.0058 |
| FBgn0035675 | 795.638 | 17.173 | 0.185 | 0.0135 |
| FBgn0038683 | 606.393 | 9.048  | 0.068 | 0.0019 |
| FBgn0027584 | 31.516  | 10.575 | 1.774 | 0.2482 |
| FBgn0003567 | 17.195  | 2.182  | 0.138 | 0.1011 |
| FBgn0036882 | 50.561  | 7.250  | 0.520 | 0.2851 |
| FBgn0020272 | 109.784 | 8.402  | 0.321 | 0.1147 |
| FBgn0029795 | 16.200  | 1.680  | 0.087 | 0.0847 |
| FBgn0032857 | 17.295  | 1.742  | 0.088 | 0.0679 |
| FBgn0032599 | 698.747 | 19.231 | 0.265 | 0.0507 |
| FBgn0000490 | 13.137  | 3.597  | 0.492 | 0.4041 |
| FBgn0000577 | 89.800  | 7.971  | 0.354 | 0.1402 |
| FBgn0011818 | 725.025 | 19.396 | 0.259 | 0.0407 |
| FBgn0039014 | 818.589 | 13.060 | 0.104 | 0.0062 |
| FBgn0000409 | 19.639  | 3.603  | 0.330 | 0.1806 |
| FBgn0031764 | 145.937 | 5.621  | 0.108 | 0.0103 |
| FBgn0001114 | 768.020 | 20.859 | 0.283 | 0.0508 |
| FBgn0034406 | 20.853  | 4.483  | 0.482 | 0.2949 |
| FBgn0053307 | 491.742 | 10.969 | 0.122 | 0.0090 |
| FBgn0026400 | 587.615 | 11.442 | 0.111 | 0.0084 |
| FBgn0031066 | 785.756 | 13.616 | 0.118 | 0.0042 |
| FBgn0031279 | 764.228 | 10.152 | 0.067 | 0.0157 |
| FBgn0030092 | 522.289 | 26.069 | 0.651 | 0.4514 |
| FBgn0031871 | 64.666  | 3.800  | 0.112 | 0.0202 |
| FBgn0036343 | 31.012  | 4.089  | 0.270 | 0.1102 |
| FBgn0019932 | 646.550 | 30.768 | 0.732 | 0.5793 |
| FBgn0032749 | 686.871 | 17.189 | 0.215 | 0.0258 |
| FBgn0037465 | 21.741  | 1.959  | 0.088 | 0.0618 |
| FBgn0004797 | 81.688  | 7.468  | 0.341 | 0.0936 |
| FBgn0001404 | 746.525 | 9.669  | 0.063 | 0.0025 |
| FBgn0037567 | 18.020  | 1.309  | 0.048 | 0.0427 |
| FBgn0035002 | 18.098  | 3.727  | 0.384 | 0.2319 |
| FBgn0039832 | 14.316  | 2.426  | 0.206 | 0.1290 |
| FBgn0039321 | 30.894  | 4.193  | 0.284 | 0.0934 |
| FBgn0033607 | 651.442 | 14.704 | 0.166 | 0.0236 |
| FBgn0000308 | 642.692 | 25.083 | 0.489 | 0.2324 |
| FBgn0030251 | 15.980  | 2.448  | 0.187 | 0.1267 |
| FBgn0033764 | 764.501 | 18.158 | 0.216 | 0.0311 |
| FBgn0033054 | 822.221 | 12.503 | 0.095 | 0.0169 |
| FBgn0031464 | 22.368  | 1.313  | 0.039 | 0.0248 |
| FBgn0034821 | 15.922  | 2.383  | 0.178 | 0.1123 |
| FBgn0033061 | 35.415  | 3.905  | 0.215 | 0.0491 |
| FBgn0051437 | 19.274  | 2.926  | 0.222 | 0.1202 |
| FBgn0039930 | 7.234   | 2.803  | 0.543 | 0.5481 |
| FBgn0024923 | 33.084  | 2.313  | 0.081 | 0.0404 |
| FBgn0038156 | 785.124 | 9.711  | 0.060 | 0.0121 |
| FBgn0038320 | 715.531 | 12.709 | 0.113 | 0.0101 |
| FBgn0038960 | 18.678  | 2.562  | 0.176 | 0.0957 |
| FBgn0037612 | 44.117  | 3.688  | 0.154 | 0.0351 |
| FBgn0037570 | 18.315  | 4.599  | 0.577 | 0.4205 |

|             |         |        |       |        |
|-------------|---------|--------|-------|--------|
| FBgn0032925 | 846.997 | 8.907  | 0.047 | 0.0018 |
| FBgn0014189 | 621.785 | 14.305 | 0.165 | 0.0136 |
| FBgn0026428 | 764.776 | 11.316 | 0.084 | 0.0062 |
| FBgn0015617 | 39.668  | 2.276  | 0.065 | 0.0181 |
| FBgn0011274 | 11.619  | 2.475  | 0.264 | 0.2081 |
| FBgn0053528 | 10.784  | 2.112  | 0.207 | 0.2021 |
| FBgn0033582 | 8.346   | 2.339  | 0.328 | 0.3136 |
| FBgn0037084 | 712.110 | 13.710 | 0.132 | 0.0045 |
| FBgn0034231 | 39.216  | 4.915  | 0.308 | 0.1036 |
| FBgn0051195 | 15.940  | 2.719  | 0.232 | 0.1531 |
| FBgn0030098 | 26.394  | 4.136  | 0.324 | 0.1325 |
| FBgn0034824 | 13.123  | 1.472  | 0.083 | 0.0834 |
| FBgn0039164 | 819.242 | 20.907 | 0.267 | 0.0435 |
| FBgn0024698 | 7.587   | 1.599  | 0.169 | 0.1954 |
| FBgn0034527 | 22.761  | 3.553  | 0.277 | 0.1079 |
| FBgn0031397 | 31.756  | 2.925  | 0.135 | 0.0454 |
| FBgn0053340 | 16.735  | 3.416  | 0.349 | 0.2177 |
| FBgn0035752 | 17.781  | 2.272  | 0.145 | 0.1011 |
| FBgn0050446 | 22.013  | 4.115  | 0.385 | 0.2097 |
| FBgn0039126 | 698.796 | 13.485 | 0.130 | 0.0327 |
| FBgn0031534 | 757.236 | 13.827 | 0.126 | 0.0134 |
| FBgn0028953 | 19.345  | 3.745  | 0.363 | 0.2259 |
| FBgn0030178 | 16.792  | 2.891  | 0.249 | 0.1572 |
| FBgn0004514 | 15.872  | 2.217  | 0.155 | 0.0879 |
| FBgn0033629 | 9.538   | 3.319  | 0.578 | 0.4961 |
| FBgn0039066 | 808.864 | 12.107 | 0.091 | 0.0021 |
| FBgn0025458 | 757.280 | 21.374 | 0.302 | 0.0921 |
| FBgn0029710 | 19.355  | 2.952  | 0.225 | 0.0995 |
| FBgn0030612 | 41.458  | 3.696  | 0.165 | 0.0379 |
| FBgn0001224 | 56.049  | 9.685  | 0.837 | 0.7610 |
| FBgn0031479 | 19.558  | 3.305  | 0.279 | 0.1199 |
| FBgn0023549 | 46.608  | 2.266  | 0.055 | 0.0139 |
| FBgn0053110 | 18.784  | 3.267  | 0.284 | 0.1460 |
| FBgn0031395 | 10.229  | 2.073  | 0.210 | 0.2231 |
| FBgn0036405 | 64.832  | 2.699  | 0.056 | 0.0250 |
| FBgn0036735 | 60.314  | 4.120  | 0.141 | 0.0360 |
| FBgn0034886 | 809.094 | 18.965 | 0.222 | 0.0241 |
| FBgn0037824 | 28.663  | 4.112  | 0.295 | 0.0928 |
| FBgn0031660 | 763.658 | 20.817 | 0.284 | 0.0623 |
| FBgn0038407 | 839.486 | 20.928 | 0.261 | 0.0396 |
| FBgn0040602 | 21.719  | 2.833  | 0.185 | 0.1066 |
| FBgn0031878 | 734.829 | 24.000 | 0.392 | 0.1292 |
| FBgn0042179 | 14.344  | 3.897  | 0.529 | 0.4073 |
| FBgn0033486 | 744.393 | 11.559 | 0.090 | 0.0028 |
| FBgn0037679 | 12.150  | 1.419  | 0.083 | 0.0854 |
| FBgn0037141 | 730.447 | 15.862 | 0.172 | 0.0105 |
| FBgn0038471 | 14.252  | 2.763  | 0.268 | 0.1795 |
| FBgn0033600 | 38.585  | 5.872  | 0.447 | 0.1995 |
| FBgn0031563 | 44.238  | 8.672  | 0.850 | 0.7730 |
| FBgn0033402 | 796.082 | 15.056 | 0.142 | 0.0077 |
| FBgn0030930 | 29.543  | 1.634  | 0.045 | 0.0178 |
| FBgn0038950 | 18.141  | 3.495  | 0.337 | 0.1920 |
| FBgn0037317 | 6.139   | 2.301  | 0.431 | 0.4437 |
| FBgn0043364 | 52.456  | 4.046  | 0.156 | 0.0175 |



|             |         |        |       |        |
|-------------|---------|--------|-------|--------|
| FBgn0035756 | 10.337  | 2.271  | 0.249 | 0.2024 |
| FBgn0037891 | 787.688 | 9.942  | 0.063 | 0.0120 |
| FBgn0004053 | 4.359   | 2.365  | 0.641 | 0.6917 |
| FBgn0035947 | 124.743 | 5.188  | 0.108 | 0.0043 |
| FBgn0044871 | 53.925  | 3.123  | 0.090 | 0.0221 |
| FBgn0011305 | 77.498  | 5.064  | 0.165 | 0.0283 |
| FBgn0036790 | 13.547  | 3.747  | 0.518 | 0.3770 |
| FBgn0038134 | 113.294 | 8.330  | 0.306 | 0.0650 |
| FBgn0032886 | 26.584  | 3.348  | 0.211 | 0.0920 |
| FBgn0038722 | 640.866 | 16.764 | 0.219 | 0.0460 |
| FBgn0032783 | 70.640  | 5.127  | 0.186 | 0.0304 |
| FBgn0033337 | 72.955  | 4.865  | 0.162 | 0.0135 |
| FBgn0010551 | 29.500  | 3.361  | 0.191 | 0.0577 |
| FBgn0044046 | 11.962  | 3.112  | 0.405 | 0.2964 |
| FBgn0038725 | 764.731 | 15.844 | 0.164 | 0.0091 |
| FBgn0003900 | 779.566 | 31.680 | 0.644 | 0.4424 |
| FBgn0037624 | 25.082  | 1.956  | 0.076 | 0.0327 |
| FBgn0035366 | 559.762 | 12.548 | 0.141 | 0.0196 |
| FBgn0025109 | 702.182 | 19.917 | 0.282 | 0.0505 |
| FBgn0000408 | 750.773 | 32.868 | 0.719 | 0.5576 |
| FBgn0050259 | 24.866  | 4.593  | 0.424 | 0.2029 |
| FBgn0038153 | 29.076  | 2.755  | 0.131 | 0.0593 |
| FBgn0032891 | 25.632  | 5.205  | 0.529 | 0.3409 |
| FBgn0036386 | 695.804 | 18.204 | 0.238 | 0.0363 |
| FBgn0041582 | 689.711 | 28.646 | 0.595 | 0.3702 |
| FBgn0027378 | 120.606 | 5.246  | 0.114 | 0.0100 |
| FBgn0051675 | 13.819  | 2.095  | 0.159 | 0.1098 |
| FBgn0003250 | 6.738   | 2.552  | 0.483 | 0.5033 |
| FBgn0043025 | 734.736 | 18.231 | 0.226 | 0.0345 |
| FBgn0044826 | 39.120  | 3.086  | 0.122 | 0.0512 |
| FBgn0022246 | 37.205  | 4.134  | 0.230 | 0.0798 |
| FBgn0037245 | 8.739   | 1.763  | 0.178 | 0.2003 |
| FBgn0037872 | 28.641  | 3.922  | 0.269 | 0.1133 |
| FBgn0037488 | 26.885  | 2.819  | 0.148 | 0.0545 |
| FBgn0036277 | 846.508 | 15.300 | 0.138 | 0.0067 |
| FBgn0028495 | 79.987  | 6.415  | 0.257 | 0.0458 |
| FBgn0017549 | 21.321  | 2.359  | 0.130 | 0.0596 |
| FBgn0034576 | 819.132 | 20.840 | 0.265 | 0.0416 |
| FBgn0036685 | 689.856 | 8.612  | 0.054 | 0.0257 |
| FBgn0038641 | 46.982  | 4.112  | 0.180 | 0.0417 |
| FBgn0034091 | 116.687 | 7.073  | 0.214 | 0.0225 |
| FBgn0036709 | 837.527 | 10.440 | 0.065 | 0.0007 |
| FBgn0031282 | 705.180 | 21.910 | 0.340 | 0.1065 |
| FBgn0031061 | 826.148 | 7.395  | 0.033 | 0.0018 |
| FBgn0031190 | 153.034 | 5.690  | 0.106 | 0.0522 |
| FBgn0032748 | 781.107 | 11.781 | 0.089 | 0.0071 |
| FBgn0040877 | 6.282   | 3.227  | 0.829 | 0.8288 |
| FBgn0016701 | 734.658 | 17.648 | 0.212 | 0.0327 |
| FBgn0032428 | 803.109 | 18.908 | 0.223 | 0.0242 |
| FBgn0015546 | 22.264  | 2.968  | 0.198 | 0.0939 |
| FBgn0019948 | 9.283   | 2.980  | 0.478 | 0.4298 |
| FBgn0029157 | 686.606 | 22.549 | 0.370 | 0.1209 |
| FBgn0037462 | 20.562  | 3.973  | 0.384 | 0.2022 |
| FBgn0064117 | 813.108 | 12.026 | 0.089 | 0.0046 |

|             |         |        |       |        |
|-------------|---------|--------|-------|--------|
| FBgn0014006 | 887.489 | 13.552 | 0.103 | 0.0036 |
| FBgn0052463 | 449.751 | 10.105 | 0.114 | 0.0122 |
| FBgn0031873 | 25.411  | 2.380  | 0.111 | 0.0437 |
| FBgn0030968 | 17.528  | 1.472  | 0.062 | 0.0641 |
| FBgn0033954 | 14.675  | 3.494  | 0.416 | 0.3085 |
| FBgn0031522 | 157.011 | 2.441  | 0.019 | 0.0010 |
| FBgn0051029 | 18.609  | 3.193  | 0.274 | 0.1529 |
| FBgn0005278 | 530.545 | 12.878 | 0.156 | 0.0262 |
| FBgn0003159 | 32.629  | 3.175  | 0.154 | 0.0462 |
| FBgn0013755 | 15.146  | 2.261  | 0.169 | 0.0981 |
| FBgn0041240 | 5.432   | 2.211  | 0.450 | 0.5091 |
| FBgn0026056 | 153.107 | 5.129  | 0.086 | 0.0076 |
| FBgn0033924 | 99.728  | 8.867  | 0.394 | 0.1359 |
| FBgn0023489 | 318.450 | 7.809  | 0.096 | 0.0034 |
| FBgn0037418 | 4.870   | 1.825  | 0.342 | 0.4141 |
| FBgn0031762 | 14.366  | 2.904  | 0.294 | 0.1903 |
| FBgn0024319 | 771.974 | 24.516 | 0.389 | 0.1269 |
| FBgn0013750 | 50.725  | 4.678  | 0.216 | 0.0384 |
| FBgn0035610 | 679.078 | 11.264 | 0.093 | 0.0191 |
| FBgn0036886 | 22.622  | 3.101  | 0.213 | 0.0851 |
| FBgn0033350 | 15.676  | 2.412  | 0.185 | 0.1169 |
| FBgn0013272 | 23.146  | 3.296  | 0.235 | 0.0994 |
| FBgn0027579 | 21.741  | 1.529  | 0.054 | 0.0229 |
| FBgn0031484 | 355.251 | 11.871 | 0.198 | 0.0370 |
| FBgn0053082 | 17.197  | 5.163  | 0.775 | 0.6753 |
| FBgn0028434 | 45.093  | 4.701  | 0.245 | 0.0710 |
| FBgn0034689 | 10.154  | 2.719  | 0.364 | 0.3266 |
| FBgn0039044 | 23.941  | 2.074  | 0.090 | 0.0555 |
| FBgn0034243 | 37.604  | 1.616  | 0.035 | 0.0088 |
| FBgn0039226 | 117.916 | 7.820  | 0.259 | 0.0447 |
| FBgn0036442 | 15.242  | 2.356  | 0.182 | 0.1064 |
| FBgn0040519 | 657.996 | 23.642 | 0.425 | 0.1661 |
| FBgn0017453 | 762.292 | 7.902  | 0.041 | 0.0142 |
| FBgn0013969 | 649.412 | 9.143  | 0.064 | 0.0042 |
| FBgn0010786 | 7.344   | 1.613  | 0.177 | 0.2258 |
| FBgn0003866 | 22.017  | 7.365  | 1.232 | 0.6985 |
| FBgn0010602 | 55.836  | 6.305  | 0.356 | 0.1129 |
| FBgn0034009 | 17.368  | 3.811  | 0.418 | 0.2859 |
| FBgn0033958 | 32.518  | 3.502  | 0.189 | 0.0787 |
| FBgn0033566 | 129.129 | 16.531 | 1.058 | 0.9144 |
| FBgn0038865 | 708.195 | 18.030 | 0.230 | 0.0593 |
| FBgn0027091 | 100.125 | 7.059  | 0.249 | 0.0360 |
| FBgn0038238 | 30.492  | 6.796  | 0.757 | 0.6406 |
| FBgn0037031 | 45.952  | 3.445  | 0.129 | 0.0226 |
| FBgn0036958 | 745.874 | 17.357 | 0.202 | 0.0178 |
| FBgn0052040 | 17.619  | 4.065  | 0.469 | 0.2936 |
| FBgn0039232 | 12.966  | 4.474  | 0.772 | 0.6947 |
| FBgn0032271 | 22.029  | 9.212  | 1.926 | 0.1980 |
| FBgn0000221 | 172.222 | 7.972  | 0.185 | 0.0236 |
| FBgn0035587 | 713.429 | 17.098 | 0.205 | 0.0319 |
| FBgn0041103 | 19.728  | 3.670  | 0.341 | 0.2008 |
| FBgn0027565 | 623.403 | 18.865 | 0.285 | 0.0520 |
| FBgn0040590 | 704.194 | 48.891 | 1.697 | 0.2771 |
| FBgn0015621 | 685.645 | 17.309 | 0.218 | 0.0825 |

|             |         |        |       |        |
|-------------|---------|--------|-------|--------|
| FBgn0035866 | 696.164 | 10.687 | 0.082 | 0.0008 |
| FBgn0011706 | 252.305 | 10.083 | 0.201 | 0.0184 |
| FBgn0004396 | 189.305 | 12.264 | 0.397 | 0.1420 |
| FBgn0002528 | 7.352   | 2.145  | 0.313 | 0.3248 |
| FBgn0011592 | 14.036  | 3.518  | 0.441 | 0.2950 |
| FBgn0036268 | 205.179 | 10.250 | 0.256 | 0.0408 |
| FBgn0038132 | 530.282 | 11.707 | 0.129 | 0.0262 |
| FBgn0034893 | 12.245  | 2.410  | 0.237 | 0.1892 |
| FBgn0032859 | 36.839  | 5.198  | 0.367 | 0.1319 |
| FBgn0000257 | 820.743 | 8.506  | 0.044 | 0.0031 |
| FBgn0015803 | 667.119 | 20.858 | 0.326 | 0.0747 |
| FBgn0039260 | 35.396  | 3.613  | 0.184 | 0.0429 |
| FBgn0030512 | 5.787   | 2.134  | 0.393 | 0.4390 |
| FBgn0027498 | 720.132 | 18.370 | 0.234 | 0.0317 |
| FBgn0039764 | 9.940   | 3.092  | 0.481 | 0.4026 |
| FBgn0036116 | 826.045 | 10.165 | 0.063 | 0.0025 |
| FBgn0024944 | 80.780  | 4.577  | 0.130 | 0.0332 |
| FBgn0039135 | 23.660  | 2.146  | 0.097 | 0.0479 |
| FBgn0033060 | 729.796 | 13.460 | 0.124 | 0.0069 |
| FBgn0032178 | 93.450  | 7.025  | 0.264 | 0.0488 |
| FBgn0036150 | 5.979   | 2.174  | 0.395 | 0.4261 |
| FBgn0039748 | 127.686 | 10.439 | 0.427 | 0.1653 |
| FBgn0040551 | 18.913  | 2.866  | 0.217 | 0.1038 |
| FBgn0035637 | 121.855 | 5.032  | 0.104 | 0.0064 |
| FBgn0032601 | 65.002  | 3.402  | 0.089 | 0.0258 |
| FBgn0037880 | 215.920 | 12.598 | 0.368 | 0.1120 |
| FBgn0053207 | 22.971  | 3.543  | 0.273 | 0.1241 |
| FBgn0033087 | 21.611  | 3.226  | 0.241 | 0.1244 |
| FBgn0029927 | 17.136  | 2.826  | 0.233 | 0.1197 |
| FBgn0052541 | 102.044 | 5.925  | 0.172 | 0.0114 |
| FBgn0039221 | 48.493  | 8.138  | 0.683 | 0.5167 |
| FBgn0036260 | 111.953 | 12.722 | 0.723 | 0.5652 |
| FBgn0036967 | 132.006 | 4.064  | 0.063 | 0.0096 |
| FBgn0037122 | 117.593 | 7.859  | 0.263 | 0.0724 |
| FBgn0027508 | 73.296  | 6.268  | 0.268 | 0.0614 |
| FBgn0035632 | 29.247  | 3.729  | 0.238 | 0.0847 |
| FBgn0029828 | 845.466 | 20.413 | 0.246 | 0.0333 |
| FBgn0010415 | 51.292  | 2.548  | 0.063 | 0.0191 |
| FBgn0028545 | 41.632  | 3.705  | 0.165 | 0.0414 |
| FBgn0037688 | 11.061  | 1.781  | 0.143 | 0.1532 |
| FBgn0027866 | 18.860  | 3.122  | 0.258 | 0.1150 |
| FBgn0037892 | 629.808 | 15.496 | 0.191 | 0.0360 |
| FBgn0031765 | 87.616  | 4.881  | 0.136 | 0.0101 |
| FBgn0024980 | 24.769  | 3.918  | 0.310 | 0.1601 |
| FBgn0034088 | 219.750 | 5.927  | 0.080 | 0.0166 |
| FBgn0067783 | 19.897  | 2.090  | 0.110 | 0.0619 |
| FBgn0010453 | 12.970  | 3.079  | 0.365 | 0.2892 |
| FBgn0039102 | 25.386  | 6.159  | 0.747 | 0.6332 |
| FBgn0035589 | 25.787  | 3.729  | 0.270 | 0.0893 |
| FBgn0030835 | 114.395 | 10.347 | 0.468 | 0.2331 |
| FBgn0034808 | 10.068  | 2.261  | 0.254 | 0.2136 |
| FBgn0005677 | 36.189  | 3.944  | 0.215 | 0.0683 |
| FBgn0025709 | 593.203 | 10.439 | 0.092 | 0.0125 |
| FBgn0034387 | 7.397   | 1.289  | 0.112 | 0.1709 |

|             |         |        |       |        |
|-------------|---------|--------|-------|--------|
| FBgn0001133 | 38.642  | 3.464  | 0.155 | 0.0318 |
| FBgn0037218 | 14.729  | 2.146  | 0.156 | 0.1120 |
| FBgn0004649 | 746.726 | 14.399 | 0.139 | 0.0070 |
| FBgn0033128 | 822.348 | 22.485 | 0.307 | 0.0649 |
| FBgn0024912 | 84.385  | 3.665  | 0.080 | 0.0045 |
| FBgn0002922 | 720.461 | 15.309 | 0.163 | 0.0213 |
| FBgn0031607 | 703.138 | 17.921 | 0.228 | 0.0363 |
| FBgn0038485 | 77.748  | 8.970  | 0.517 | 0.2720 |
| FBgn0052267 | 5.612   | 3.765  | 1.263 | 0.7549 |
| FBgn0038667 | 53.379  | 4.532  | 0.192 | 0.0303 |
| FBgn0004395 | 809.676 | 12.027 | 0.089 | 0.0026 |
| FBgn0038747 | 38.706  | 3.243  | 0.136 | 0.0384 |
| FBgn0023535 | 739.744 | 14.622 | 0.145 | 0.0060 |
| FBgn0053120 | 98.735  | 5.560  | 0.157 | 0.0144 |
| FBgn0034461 | 3.573   | 1.651  | 0.381 | 0.4769 |
| FBgn0034940 | 6.091   | 2.965  | 0.722 | 0.7259 |
| FBgn0051786 | 26.893  | 4.496  | 0.376 | 0.1787 |
| FBgn0010316 | 702.644 | 21.239 | 0.321 | 0.0916 |
| FBgn0039784 | 31.377  | 2.953  | 0.139 | 0.0409 |
| FBgn0015276 | 15.525  | 2.552  | 0.210 | 0.1346 |
| FBgn0029756 | 144.110 | 4.538  | 0.071 | 0.0371 |
| FBgn0032678 | 7.085   | 1.237  | 0.108 | 0.1530 |
| FBgn0033912 | 23.678  | 4.054  | 0.347 | 0.1370 |
| FBgn0031690 | 34.706  | 3.961  | 0.226 | 0.0950 |
| FBgn0034920 | 23.280  | 4.784  | 0.492 | 0.2686 |
| FBgn0033382 | 900.841 | 12.931 | 0.093 | 0.0013 |
| FBgn0032489 | 32.743  | 6.453  | 0.636 | 0.4621 |
| FBgn0030800 | 16.164  | 1.012  | 0.032 | 0.0280 |
| FBgn0035167 | 26.009  | 4.577  | 0.403 | 0.1752 |
| FBgn0033936 | 27.358  | 4.141  | 0.313 | 0.1076 |
| FBgn0020299 | 197.204 | 11.251 | 0.321 | 0.0750 |
| FBgn0033452 | 16.725  | 1.899  | 0.108 | 0.0699 |
| FBgn0033949 | 722.886 | 17.160 | 0.204 | 0.0194 |
| FBgn0034928 | 10.892  | 4.590  | 0.967 | 0.9592 |
| FBgn0027936 | 21.775  | 2.775  | 0.177 | 0.0776 |
| FBgn0053139 | 17.379  | 1.655  | 0.079 | 0.0485 |
| FBgn0035234 | 111.893 | 3.354  | 0.050 | 0.0043 |
| FBgn0024315 | 31.852  | 4.063  | 0.259 | 0.0679 |
| FBgn0033597 | 32.722  | 3.570  | 0.195 | 0.0651 |
| FBgn0039844 | 869.575 | 7.980  | 0.037 | 0.0005 |
| FBgn0003995 | 9.629   | 1.698  | 0.150 | 0.1766 |
| FBgn0034049 | 31.052  | 4.792  | 0.370 | 0.1512 |
| FBgn0031326 | 29.493  | 5.765  | 0.563 | 0.3566 |
| FBgn0032335 | 3.228   | 2.205  | 0.753 | 0.8063 |
| FBgn0051713 | 8.640   | 2.736  | 0.433 | 0.3927 |
| FBgn0035807 | 24.297  | 1.957  | 0.079 | 0.0462 |
| FBgn0029118 | 16.234  | 1.522  | 0.071 | 0.0595 |
| FBgn0030452 | 15.859  | 3.009  | 0.285 | 0.1838 |
| FBgn0034871 | 776.256 | 15.503 | 0.155 | 0.0120 |
| FBgn0030817 | 37.530  | 3.071  | 0.126 | 0.0231 |
| FBgn0043005 | 55.987  | 7.795  | 0.543 | 0.3409 |
| FBgn0037078 | 28.907  | 7.611  | 1.002 | 0.9981 |
| FBgn0030398 | 23.104  | 6.466  | 0.905 | 0.8620 |
| FBgn0035198 | 26.440  | 2.942  | 0.164 | 0.0633 |

|             |         |        |       |        |
|-------------|---------|--------|-------|--------|
| FBgn0026378 | 693.689 | 17.925 | 0.232 | 0.0729 |
| FBgn0030996 | 12.722  | 2.827  | 0.314 | 0.2121 |
| FBgn0004045 | 16.211  | 2.470  | 0.188 | 0.1524 |
| FBgn0002023 | 17.321  | 3.724  | 0.400 | 0.2621 |
| FBgn0044328 | 17.064  | 2.471  | 0.179 | 0.1009 |
| FBgn0039559 | 823.063 | 20.946 | 0.267 | 0.0423 |
| FBgn0030874 | 29.301  | 4.121  | 0.290 | 0.1206 |
| FBgn0036583 | 11.305  | 1.964  | 0.171 | 0.1651 |
| FBgn0016754 | 11.578  | 2.082  | 0.187 | 0.1921 |
| FBgn0028741 | 53.598  | 2.519  | 0.059 | 0.0131 |
| FBgn0031961 | 673.899 | 21.933 | 0.357 | 0.0995 |
| FBgn0036414 | 92.133  | 9.988  | 0.541 | 0.3133 |
| FBgn0034946 | 8.024   | 2.211  | 0.305 | 0.2953 |
| FBgn0050460 | 734.065 | 21.086 | 0.303 | 0.0619 |
| FBgn0003278 | 745.455 | 8.656  | 0.050 | 0.0015 |
| FBgn0039873 | 36.874  | 7.546  | 0.772 | 0.6511 |
| FBgn0019643 | 17.704  | 3.558  | 0.357 | 0.1775 |
| FBgn0032671 | 6.159   | 1.670  | 0.226 | 0.2700 |
| FBgn0032732 | 639.492 | 22.989 | 0.413 | 0.1493 |
| FBgn0027082 | 142.654 | 10.124 | 0.359 | 0.1069 |
| FBgn0051149 | 24.660  | 3.269  | 0.217 | 0.0775 |
| FBgn0039730 | 651.507 | 18.059 | 0.250 | 0.0829 |
| FBgn0032840 | 13.480  | 2.273  | 0.192 | 0.1653 |
| FBgn0032358 | 782.080 | 20.794 | 0.276 | 0.1203 |
| FBgn0036740 | 84.157  | 5.350  | 0.170 | 0.0345 |
| FBgn0020615 | 130.643 | 3.194  | 0.039 | 0.0058 |
| FBgn0020756 | 89.503  | 5.546  | 0.172 | 0.0236 |
| FBgn0051525 | 11.540  | 2.592  | 0.291 | 0.2409 |
| FBgn0030076 | 41.117  | 2.621  | 0.084 | 0.0267 |
| FBgn0036741 | 37.783  | 1.890  | 0.047 | 0.0230 |
| FBgn0039420 | 29.528  | 2.959  | 0.148 | 0.0436 |
| FBgn0034503 | 825.215 | 12.828 | 0.100 | 0.0031 |
| FBgn0035505 | 753.805 | 17.902 | 0.213 | 0.0218 |
| FBgn0032058 | 30.356  | 5.272  | 0.458 | 0.2395 |
| FBgn0038750 | 70.444  | 6.894  | 0.337 | 0.1021 |
| FBgn0033237 | 18.513  | 2.883  | 0.225 | 0.1339 |
| FBgn0031800 | 781.252 | 12.734 | 0.104 | 0.0467 |
| FBgn0004571 | 40.120  | 2.596  | 0.084 | 0.0254 |
| FBgn0025808 | 22.058  | 3.502  | 0.278 | 0.1536 |
| FBgn0032415 | 27.683  | 5.994  | 0.649 | 0.4836 |
| FBgn0032181 | 763.720 | 25.432 | 0.423 | 0.1592 |
| FBgn0024230 | 78.807  | 5.209  | 0.172 | 0.0291 |
| FBgn0051463 | 6.776   | 1.248  | 0.115 | 0.1660 |
| FBgn0050273 | 21.532  | 1.954  | 0.089 | 0.0429 |
| FBgn0023545 | 8.396   | 2.865  | 0.489 | 0.4468 |
| FBgn0051523 | 19.506  | 4.440  | 0.505 | 0.2965 |
| FBgn0011286 | 671.995 | 13.010 | 0.126 | 0.0046 |
| FBgn0031451 | 24.894  | 5.739  | 0.661 | 0.5199 |
| FBgn0038334 | 475.623 | 23.459 | 0.579 | 0.3654 |
| FBgn0020240 | 14.847  | 1.924  | 0.125 | 0.0848 |
| FBgn0000286 | 18.309  | 3.026  | 0.250 | 0.1102 |
| FBgn0026777 | 13.215  | 2.691  | 0.274 | 0.1996 |
| FBgn0015575 | 29.106  | 4.394  | 0.332 | 0.1090 |
| FBgn0035938 | 4.478   | 1.769  | 0.350 | 0.4187 |

|             |         |        |       |        |
|-------------|---------|--------|-------|--------|
| FBgn0031631 | 25.280  | 3.370  | 0.225 | 0.1061 |
| FBgn0028665 | 11.947  | 2.406  | 0.242 | 0.2307 |
| FBgn0015298 | 9.614   | 2.698  | 0.379 | 0.3420 |
| FBgn0032949 | 449.943 | 18.214 | 0.369 | 0.1088 |
| FBgn0004882 | 87.524  | 3.944  | 0.089 | 0.0140 |
| FBgn0034601 | 26.015  | 2.771  | 0.148 | 0.0541 |
| FBgn0053263 | 21.892  | 3.736  | 0.319 | 0.1405 |
| FBgn0025814 | 96.202  | 10.420 | 0.564 | 0.3302 |
| FBgn0034474 | 18.203  | 7.137  | 1.399 | 0.5319 |
| FBgn0052695 | 143.379 | 18.131 | 1.146 | 0.7945 |
| FBgn0029821 | 78.123  | 4.221  | 0.114 | 0.0297 |
| FBgn0029733 | 25.274  | 4.041  | 0.323 | 0.1406 |
| FBgn0029648 | 6.311   | 1.256  | 0.125 | 0.1775 |
| FBgn0040828 | 46.697  | 4.885  | 0.256 | 0.0580 |
| FBgn0050166 | 9.512   | 4.044  | 0.860 | 0.8320 |
| FBgn0029877 | 765.291 | 17.553 | 0.201 | 0.0171 |
| FBgn0039745 | 17.435  | 2.947  | 0.249 | 0.1340 |
| FBgn0030945 | 736.618 | 24.421 | 0.405 | 0.1415 |
| FBgn0037697 | 10.338  | 1.907  | 0.176 | 0.1451 |
| FBgn0032420 | 21.850  | 2.502  | 0.143 | 0.0691 |
| FBgn0032624 | 14.530  | 3.082  | 0.327 | 0.2058 |
| FBgn0039172 | 624.641 | 21.391 | 0.366 | 0.1081 |
| FBgn0023423 | 35.688  | 4.356  | 0.266 | 0.1146 |
| FBgn0036461 | 19.330  | 3.252  | 0.274 | 0.1340 |
| FBgn0031675 | 779.636 | 9.623  | 0.059 | 0.0023 |
| FBgn0027540 | 755.997 | 26.985 | 0.482 | 0.2231 |
| FBgn0037719 | 11.560  | 1.871  | 0.151 | 0.1280 |
| FBgn0030189 | 113.403 | 6.673  | 0.196 | 0.0787 |
| FBgn0010762 | 705.296 | 30.710 | 0.669 | 0.4799 |
| FBgn0034489 | 37.283  | 1.400  | 0.026 | 0.0097 |
| FBgn0003008 | 30.041  | 6.229  | 0.646 | 0.4622 |
| FBgn0029152 | 820.193 | 18.637 | 0.212 | 0.0207 |
| FBgn0039816 | 756.660 | 19.267 | 0.245 | 0.0333 |
| FBgn0016687 | 17.281  | 4.367  | 0.552 | 0.3773 |
| FBgn0039697 | 21.330  | 2.570  | 0.155 | 0.0731 |
| FBgn0002542 | 28.184  | 3.670  | 0.239 | 0.0850 |
| FBgn0032182 | 10.768  | 4.532  | 0.954 | 0.9425 |
| FBgn0023508 | 14.730  | 1.517  | 0.078 | 0.0758 |
| FBgn0010053 | 687.448 | 11.379 | 0.094 | 0.0123 |
| FBgn0069354 | 62.347  | 4.568  | 0.167 | 0.0165 |
| FBgn0040068 | 779.132 | 26.152 | 0.439 | 0.1752 |
| FBgn0051157 | 167.243 | 8.934  | 0.239 | 0.0381 |
| FBgn0034602 | 747.970 | 20.374 | 0.277 | 0.0608 |
| FBgn0037690 | 31.783  | 2.448  | 0.094 | 0.0311 |
| FBgn0030151 | 773.125 | 16.661 | 0.180 | 0.0122 |
| FBgn0027559 | 22.528  | 2.938  | 0.192 | 0.0684 |
| FBgn0028690 | 22.452  | 2.246  | 0.112 | 0.0610 |
| FBgn0033580 | 179.315 | 7.571  | 0.160 | 0.0360 |
| FBgn0039269 | 708.979 | 16.350 | 0.189 | 0.0173 |
| FBgn0040271 | 14.991  | 2.509  | 0.210 | 0.1347 |
| FBgn0051712 | 12.756  | 1.919  | 0.144 | 0.1393 |
| FBgn0031772 | 13.278  | 3.260  | 0.400 | 0.2992 |
| FBgn0039634 | 19.998  | 2.457  | 0.151 | 0.0934 |
| FBgn0034158 | 828.014 | 10.437 | 0.066 | 0.0013 |

|             |         |        |       |        |
|-------------|---------|--------|-------|--------|
| FBgn0033405 | 153.881 | 7.056  | 0.162 | 0.0218 |
| FBgn0039075 | 13.882  | 2.297  | 0.190 | 0.1213 |
| FBgn0040930 | 761.956 | 16.031 | 0.169 | 0.0136 |
| FBgn0038309 | 36.241  | 2.652  | 0.097 | 0.0343 |
| FBgn0039429 | 79.951  | 5.782  | 0.209 | 0.0322 |
| FBgn0027546 | 885.391 | 14.840 | 0.124 | 0.0036 |
| FBgn0000358 | 795.850 | 16.281 | 0.167 | 0.0096 |
| FBgn0041186 | 20.990  | 4.144  | 0.409 | 0.1996 |
| FBgn0013995 | 32.286  | 2.963  | 0.136 | 0.0425 |
| FBgn0038390 | 679.449 | 14.545 | 0.156 | 0.0097 |
| FBgn0003002 | 29.715  | 4.447  | 0.333 | 0.1198 |
| FBgn0037619 | 37.859  | 5.083  | 0.341 | 0.1059 |
| FBgn0003130 | 12.108  | 3.406  | 0.479 | 0.3909 |
| FBgn0051559 | 54.467  | 6.126  | 0.345 | 0.1398 |
| FBgn0036696 | 673.625 | 13.146 | 0.128 | 0.0068 |
| FBgn0032901 | 17.272  | 3.562  | 0.367 | 0.1984 |
| FBgn0003011 | 615.322 | 20.872 | 0.354 | 0.0996 |
| FBgn0036760 | 14.834  | 1.226  | 0.051 | 0.0508 |
| FBgn0029888 | 39.592  | 1.797  | 0.041 | 0.0073 |
| FBgn0053155 | 16.251  | 3.249  | 0.325 | 0.1806 |
| FBgn0051072 | 99.572  | 4.582  | 0.105 | 0.0090 |
| FBgn0032398 | 828.635 | 14.765 | 0.132 | 0.0058 |
| FBgn0029117 | 794.187 | 11.477 | 0.083 | 0.0074 |
| FBgn0032730 | 23.120  | 3.424  | 0.253 | 0.0908 |
| FBgn0037182 | 6.342   | 1.816  | 0.260 | 0.2928 |
| FBgn0026702 | 834.992 | 15.667 | 0.147 | 0.0062 |
| FBgn0024288 | 21.271  | 3.802  | 0.340 | 0.1782 |
| FBgn0019957 | 811.438 | 12.619 | 0.098 | 0.0030 |
| FBgn0040078 | 13.509  | 2.030  | 0.153 | 0.1007 |
| FBgn0024329 | 21.904  | 2.022  | 0.093 | 0.0411 |
| FBgn0030796 | 7.427   | 1.928  | 0.250 | 0.2725 |
| FBgn0011754 | 98.860  | 6.743  | 0.230 | 0.0311 |
| FBgn0034667 | 20.839  | 3.839  | 0.354 | 0.1649 |
| FBgn0000053 | 721.874 | 19.378 | 0.260 | 0.0807 |
| FBgn0027794 | 25.483  | 2.382  | 0.111 | 0.0637 |
| FBgn0035951 | 18.573  | 2.697  | 0.196 | 0.0967 |
| FBgn0028992 | 687.625 | 19.518 | 0.277 | 0.0470 |
| FBgn0016697 | 18.799  | 2.646  | 0.186 | 0.1226 |
| FBgn0035981 | 78.695  | 3.297  | 0.069 | 0.0076 |
| FBgn0033653 | 766.936 | 17.447 | 0.198 | 0.0171 |
| FBgn0035484 | 31.130  | 4.041  | 0.262 | 0.1169 |
| FBgn0030606 | 30.167  | 2.972  | 0.146 | 0.0548 |
| FBgn0033434 | 17.521  | 2.228  | 0.142 | 0.0780 |
| FBgn0033529 | 613.240 | 20.666 | 0.348 | 0.0931 |
| FBgn0010750 | 158.892 | 4.381  | 0.060 | 0.0035 |
| FBgn0011207 | 92.619  | 4.257  | 0.098 | 0.0087 |
| FBgn0036775 | 784.009 | 19.150 | 0.234 | 0.0476 |
| FBgn0001301 | 21.460  | 3.824  | 0.341 | 0.1652 |
| FBgn0024811 | 5.478   | 2.189  | 0.437 | 0.4835 |
| FBgn0032296 | 22.305  | 4.902  | 0.539 | 0.3423 |
| FBgn0035282 | 25.267  | 3.198  | 0.202 | 0.0832 |
| FBgn0039509 | 21.579  | 1.677  | 0.065 | 0.0462 |
| FBgn0031183 | 87.163  | 4.666  | 0.125 | 0.0362 |
| FBgn0028982 | 713.149 | 21.844 | 0.335 | 0.0827 |

|             |         |        |       |        |
|-------------|---------|--------|-------|--------|
| FBgn0031908 | 626.113 | 10.872 | 0.094 | 0.0055 |
| FBgn0026198 | 31.421  | 2.834  | 0.128 | 0.0496 |
| FBgn0038661 | 8.837   | 1.617  | 0.148 | 0.1625 |
| FBgn0030700 | 45.427  | 5.286  | 0.308 | 0.0984 |
| FBgn0034803 | 194.820 | 6.607  | 0.112 | 0.0123 |
| FBgn0037660 | 37.078  | 3.572  | 0.172 | 0.0609 |
| FBgn0034144 | 5.801   | 1.692  | 0.247 | 0.2968 |
| FBgn0000166 | 100.807 | 5.752  | 0.164 | 0.0188 |
| FBgn0031944 | 24.927  | 3.706  | 0.275 | 0.1298 |
| FBgn0037551 | 75.624  | 3.840  | 0.098 | 0.0088 |
| FBgn0011722 | 82.882  | 4.515  | 0.123 | 0.0165 |
| FBgn0035360 | 749.094 | 21.270 | 0.302 | 0.0614 |
| FBgn0000015 | 711.103 | 16.437 | 0.190 | 0.0209 |
| FBgn0034720 | 29.839  | 3.497  | 0.205 | 0.0779 |
| FBgn0050148 | 31.645  | 2.245  | 0.080 | 0.0212 |
| FBgn0020930 | 51.822  | 3.747  | 0.135 | 0.0225 |
| FBgn0016792 | 4.983   | 1.294  | 0.168 | 0.2482 |
| FBgn0039122 | 30.363  | 3.492  | 0.201 | 0.0623 |
| FBgn0040850 | 16.220  | 4.599  | 0.652 | 0.5139 |
| FBgn0029894 | 10.567  | 3.123  | 0.462 | 0.3872 |
| FBgn0030786 | 781.820 | 15.159 | 0.147 | 0.0112 |
| FBgn0033897 | 68.060  | 4.278  | 0.134 | 0.0254 |
| FBgn0034181 | 34.118  | 2.501  | 0.092 | 0.0418 |
| FBgn0036515 | 119.146 | 7.397  | 0.230 | 0.0272 |
| FBgn0028388 | 742.833 | 15.242 | 0.156 | 0.0105 |
| FBgn0031954 | 841.097 | 9.766  | 0.057 | 0.0073 |
| FBgn0038213 | 22.468  | 3.229  | 0.232 | 0.1147 |
| FBgn0017581 | 749.409 | 15.040 | 0.151 | 0.0068 |
| FBgn0030183 | 10.100  | 3.369  | 0.562 | 0.4768 |
| FBgn0035000 | 749.665 | 22.497 | 0.338 | 0.0849 |
| FBgn0037282 | 22.241  | 3.122  | 0.219 | 0.1073 |
| FBgn0025463 | 756.885 | 15.440 | 0.157 | 0.0156 |
| FBgn0031724 | 22.313  | 0.857  | 0.016 | 0.0165 |
| FBgn0039532 | 14.986  | 2.869  | 0.275 | 0.1991 |
| FBgn0032652 | 732.760 | 25.014 | 0.427 | 0.1704 |
| FBgn0030582 | 21.582  | 1.490  | 0.051 | 0.0304 |
| FBgn0032142 | 21.352  | 2.477  | 0.144 | 0.0773 |
| FBgn0031826 | 23.200  | 5.069  | 0.554 | 0.3712 |
| FBgn0029925 | 23.806  | 3.261  | 0.223 | 0.1141 |
| FBgn0034419 | 37.594  | 4.380  | 0.255 | 0.1041 |
| FBgn0032363 | 602.858 | 18.956 | 0.298 | 0.0813 |
| FBgn0038230 | 16.959  | 3.421  | 0.345 | 0.2260 |
| FBgn0039829 | 16.379  | 2.914  | 0.259 | 0.1882 |
| FBgn0014001 | 32.531  | 3.942  | 0.239 | 0.0988 |
| FBgn0038828 | 12.457  | 2.878  | 0.332 | 0.2448 |
| FBgn0037475 | 766.920 | 25.269 | 0.416 | 0.1521 |
| FBgn0043799 | 13.098  | 2.791  | 0.297 | 0.2108 |
| FBgn0038447 | 44.694  | 5.602  | 0.351 | 0.1305 |
| FBgn0029568 | 34.557  | 5.731  | 0.475 | 0.2416 |
| FBgn0035483 | 659.250 | 15.196 | 0.175 | 0.0272 |
| FBgn0033557 | 861.394 | 6.003  | 0.021 | 0.0002 |
| FBgn0030636 | 77.055  | 11.450 | 0.851 | 0.7730 |
| FBgn0003194 | 34.645  | 4.697  | 0.318 | 0.1342 |
| FBgn0038768 | 34.920  | 2.903  | 0.121 | 0.0375 |



|             |         |        |       |        |
|-------------|---------|--------|-------|--------|
| FBgn0033541 | 5.980   | 5.107  | 2.180 | 0.1905 |
| FBgn0012344 | 687.163 | 19.675 | 0.282 | 0.0495 |
| FBgn0038307 | 68.083  | 5.903  | 0.256 | 0.0578 |
| FBgn0036666 | 79.286  | 7.518  | 0.356 | 0.1018 |
| FBgn0033232 | 8.476   | 2.024  | 0.242 | 0.2411 |
| FBgn0037717 | 680.979 | 33.565 | 0.827 | 0.7310 |
| FBgn0035790 | 4.214   | 3.118  | 1.154 | 0.8737 |
| FBgn0041174 | 8.682   | 1.768  | 0.180 | 0.1866 |
| FBgn0032467 | 27.920  | 1.041  | 0.019 | 0.0128 |
| FBgn0000180 | 19.381  | 3.742  | 0.361 | 0.2092 |
| FBgn0030174 | 68.509  | 4.360  | 0.139 | 0.0136 |
| FBgn0034709 | 15.256  | 1.959  | 0.126 | 0.1230 |
| FBgn0034654 | 13.349  | 2.306  | 0.199 | 0.1471 |
| FBgn0032645 | 596.132 | 25.990 | 0.567 | 0.3311 |
| FBgn0030575 | 15.904  | 3.625  | 0.413 | 0.2589 |
| FBgn0031410 | 7.737   | 2.411  | 0.376 | 0.3575 |
| FBgn0032692 | 10.595  | 2.730  | 0.352 | 0.2680 |
| FBgn0040529 | 59.297  | 6.304  | 0.335 | 0.0908 |
| FBgn0039048 | 766.892 | 26.548 | 0.460 | 0.1975 |
| FBgn0039453 | 26.381  | 6.068  | 0.698 | 0.5418 |
| FBgn0001085 | 50.826  | 5.348  | 0.281 | 0.0693 |
| FBgn0033391 | 31.285  | 3.872  | 0.240 | 0.0956 |
| FBgn0042112 | 35.099  | 1.598  | 0.036 | 0.0169 |
| FBgn0030552 | 659.104 | 14.486 | 0.159 | 0.0489 |
| FBgn0033548 | 807.640 | 13.318 | 0.110 | 0.0036 |
| FBgn0034734 | 849.193 | 12.581 | 0.093 | 0.0014 |
| FBgn0039868 | 608.384 | 19.581 | 0.315 | 0.0707 |
| FBgn0034157 | 641.753 | 22.965 | 0.411 | 0.1468 |
| FBgn0039735 | 676.659 | 20.576 | 0.313 | 0.0930 |
| FBgn0034084 | 29.884  | 3.457  | 0.200 | 0.0531 |
| FBgn0037618 | 772.536 | 10.368 | 0.070 | 0.0038 |
| FBgn0031948 | 15.229  | 2.285  | 0.171 | 0.1240 |
| FBgn0035150 | 43.198  | 2.805  | 0.091 | 0.0249 |
| FBgn0035209 | 40.747  | 4.463  | 0.244 | 0.0707 |
| FBgn0036427 | 748.014 | 10.450 | 0.073 | 0.0112 |
| FBgn0034363 | 851.251 | 8.495  | 0.042 | 0.0007 |
| FBgn0036003 | 707.429 | 17.160 | 0.208 | 0.0682 |
| FBgn0031603 | 800.487 | 22.401 | 0.313 | 0.0685 |
| FBgn0035617 | 652.736 | 16.296 | 0.203 | 0.0182 |
| FBgn0039408 | 11.497  | 2.495  | 0.271 | 0.2202 |
| FBgn0023522 | 74.760  | 3.346  | 0.075 | 0.0079 |
| FBgn0036774 | 20.917  | 2.015  | 0.097 | 0.0619 |
| FBgn0032619 | 26.634  | 4.164  | 0.326 | 0.1364 |
| FBgn0031752 | 48.365  | 4.014  | 0.167 | 0.0278 |
| FBgn0010238 | 89.663  | 6.504  | 0.236 | 0.0314 |
| FBgn0042110 | 17.546  | 3.391  | 0.328 | 0.2233 |
| FBgn0032371 | 45.070  | 4.238  | 0.199 | 0.0546 |
| FBgn0020445 | 4.355   | 0.783  | 0.070 | 0.1446 |
| FBgn0032775 | 28.489  | 2.846  | 0.142 | 0.0629 |
| FBgn0040588 | 12.752  | 2.528  | 0.251 | 0.1681 |
| FBgn0061361 | 742.214 | 17.196 | 0.199 | 0.0226 |
| FBgn0029133 | 31.035  | 2.234  | 0.080 | 0.0384 |
| FBgn0053508 | 139.239 | 20.787 | 1.552 | 0.3757 |
| FBgn0035904 | 13.051  | 1.928  | 0.142 | 0.1372 |

|             |         |        |       |        |
|-------------|---------|--------|-------|--------|
| FBgn0038570 | 15.902  | 3.644  | 0.418 | 0.2843 |
| FBgn0034997 | 30.276  | 3.526  | 0.205 | 0.0926 |
| FBgn0030391 | 844.008 | 9.471  | 0.053 | 0.0009 |
| FBgn0035064 | 18.757  | 5.799  | 0.897 | 0.8516 |
| FBgn0035461 | 96.890  | 3.925  | 0.080 | 0.0056 |
| FBgn0023129 | 41.247  | 5.427  | 0.357 | 0.1127 |
| FBgn0039187 | 793.853 | 10.665 | 0.072 | 0.0143 |
| FBgn0051414 | 37.988  | 8.267  | 0.899 | 0.8511 |
| FBgn0039870 | 14.002  | 2.594  | 0.240 | 0.1604 |
| FBgn0034281 | 25.626  | 6.282  | 0.770 | 0.6633 |
| FBgn0034873 | 11.107  | 2.784  | 0.349 | 0.3019 |
| FBgn0030492 | 22.024  | 7.693  | 1.344 | 0.5789 |
| FBgn0039485 | 857.598 | 18.085 | 0.191 | 0.0148 |
| FBgn0029807 | 30.877  | 3.101  | 0.156 | 0.0436 |
| FBgn0033706 | 838.446 | 13.983 | 0.117 | 0.0223 |
| FBgn0029629 | 819.058 | 8.102  | 0.040 | 0.0008 |
| FBgn0032034 | 14.323  | 2.889  | 0.291 | 0.2324 |
| FBgn0031637 | 792.365 | 10.784 | 0.073 | 0.0022 |
| FBgn0030061 | 759.649 | 13.550 | 0.121 | 0.0097 |
| FBgn0044511 | 26.059  | 2.842  | 0.155 | 0.0476 |
| FBgn0034052 | 43.217  | 5.660  | 0.371 | 0.1449 |
| FBgn0033441 | 71.116  | 3.026  | 0.064 | 0.0188 |
| FBgn0005593 | 14.825  | 2.643  | 0.236 | 0.1709 |
| FBgn0033918 | 714.110 | 12.623 | 0.112 | 0.0337 |
| FBgn0011660 | 90.723  | 9.275  | 0.474 | 0.2741 |
| FBgn0034646 | 44.123  | 3.035  | 0.104 | 0.0204 |
| FBgn0050067 | 19.553  | 1.682  | 0.072 | 0.0461 |
| FBgn0038420 | 785.017 | 15.485 | 0.153 | 0.0263 |
| FBgn0034834 | 35.965  | 6.248  | 0.543 | 0.3269 |
| FBgn0036732 | 59.452  | 7.144  | 0.429 | 0.2325 |
| FBgn0051125 | 17.502  | 3.407  | 0.332 | 0.1793 |
| FBgn0033840 | 138.758 | 6.209  | 0.139 | 0.0122 |
| FBgn0045502 | 674.176 | 12.679 | 0.119 | 0.0207 |
| FBgn0000462 | 23.971  | 5.109  | 0.544 | 0.3415 |
| FBgn0028980 | 26.199  | 2.981  | 0.170 | 0.0486 |
| FBgn0017430 | 32.641  | 5.159  | 0.408 | 0.1718 |
| FBgn0004921 | 749.084 | 20.727 | 0.287 | 0.0528 |
| FBgn0062413 | 30.215  | 3.423  | 0.194 | 0.0637 |
| FBgn0028967 | 656.510 | 16.870 | 0.217 | 0.0646 |
| FBgn0020407 | 814.164 | 8.547  | 0.045 | 0.0114 |
| FBgn0039669 | 26.146  | 2.045  | 0.080 | 0.0279 |
| FBgn0039430 | 743.295 | 21.889 | 0.322 | 0.0744 |
| FBgn0002036 | 109.235 | 6.218  | 0.177 | 0.0165 |
| FBgn0028406 | 15.310  | 1.827  | 0.109 | 0.0681 |
| FBgn0034664 | 24.331  | 5.533  | 0.629 | 0.4477 |
| FBgn0010590 | 20.344  | 2.120  | 0.110 | 0.0789 |
| FBgn0030794 | 773.124 | 13.600 | 0.120 | 0.0133 |
| FBgn0040996 | 9.882   | 3.675  | 0.683 | 0.6130 |
| FBgn0034265 | 13.095  | 3.275  | 0.410 | 0.3041 |
| FBgn0051835 | 226.950 | 7.371  | 0.120 | 0.0147 |
| FBgn0039664 | 57.986  | 5.700  | 0.280 | 0.0606 |
| FBgn0004510 | 780.622 | 13.223 | 0.112 | 0.0036 |
| FBgn0064237 | 726.980 | 17.188 | 0.203 | 0.0181 |
| FBgn0052407 | 15.568  | 3.956  | 0.503 | 0.3488 |

|             |         |        |       |        |
|-------------|---------|--------|-------|--------|
| FBgn0040743 | 777.487 | 18.152 | 0.212 | 0.0208 |
| FBgn0011569 | 21.009  | 3.475  | 0.287 | 0.1325 |
| FBgn0033989 | 813.096 | 18.804 | 0.217 | 0.0240 |
| FBgn0003882 | 125.663 | 4.834  | 0.093 | 0.0069 |
| FBgn0035370 | 11.422  | 1.958  | 0.168 | 0.1731 |
| FBgn0014467 | 729.772 | 8.830  | 0.053 | 0.0161 |
| FBgn0036219 | 10.707  | 3.493  | 0.570 | 0.4933 |
| FBgn0035337 | 25.241  | 2.168  | 0.093 | 0.0491 |
| FBgn0011643 | 20.735  | 4.136  | 0.413 | 0.2255 |
| FBgn0028746 | 33.159  | 5.480  | 0.453 | 0.2074 |
| FBgn0039209 | 810.463 | 13.141 | 0.107 | 0.0024 |
| FBgn0051241 | 5.863   | 1.484  | 0.188 | 0.2591 |
| FBgn0053003 | 14.415  | 2.175  | 0.164 | 0.1380 |
| FBgn0051320 | 13.464  | 3.099  | 0.357 | 0.2616 |
| FBgn0004177 | 28.403  | 2.727  | 0.131 | 0.0412 |
| FBgn0050084 | 686.644 | 29.847 | 0.649 | 0.4495 |
| FBgn0050185 | 16.372  | 1.273  | 0.049 | 0.0465 |
| FBgn0003941 | 17.011  | 3.555  | 0.371 | 0.2349 |
| FBgn0011656 | 159.621 | 11.162 | 0.390 | 0.1293 |
| FBgn0029827 | 28.786  | 3.461  | 0.208 | 0.0523 |
| FBgn0021750 | 25.867  | 4.820  | 0.449 | 0.2429 |
| FBgn0038394 | 107.661 | 6.474  | 0.195 | 0.0183 |
| FBgn0033765 | 834.847 | 15.602 | 0.146 | 0.0090 |
| FBgn0037743 | 695.968 | 16.935 | 0.206 | 0.0383 |
| FBgn0039684 | 768.642 | 19.367 | 0.244 | 0.0323 |
| FBgn0038654 | 806.090 | 18.566 | 0.214 | 0.0218 |
| FBgn0031537 | 59.375  | 3.932  | 0.130 | 0.0147 |
| FBgn0032017 | 154.945 | 5.115  | 0.084 | 0.0049 |
| FBgn0039636 | 142.676 | 5.133  | 0.092 | 0.0052 |
| FBgn0020910 | 13.854  | 2.066  | 0.154 | 0.1386 |
| FBgn0026403 | 783.581 | 15.089 | 0.145 | 0.0061 |
| FBgn0031506 | 652.783 | 23.355 | 0.418 | 0.1536 |
| FBgn0035833 | 14.435  | 3.190  | 0.352 | 0.2438 |
| FBgn0001142 | 57.314  | 4.076  | 0.145 | 0.0192 |
| FBgn0031909 | 443.866 | 19.573 | 0.432 | 0.1672 |
| FBgn0034462 | 22.059  | 2.971  | 0.200 | 0.1041 |
| FBgn0010339 | 18.062  | 3.810  | 0.402 | 0.2690 |
| FBgn0003062 | 16.378  | 2.590  | 0.205 | 0.1619 |
| FBgn0039067 | 19.760  | 3.988  | 0.402 | 0.2195 |
| FBgn0062440 | 21.841  | 2.541  | 0.148 | 0.0545 |
| FBgn0032850 | 23.825  | 1.988  | 0.083 | 0.0418 |
| FBgn0029831 | 21.516  | 3.485  | 0.282 | 0.1089 |
| FBgn0034002 | 820.863 | 16.281 | 0.161 | 0.0087 |
| FBgn0033680 | 82.470  | 5.779  | 0.202 | 0.0222 |
| FBgn0031343 | 23.452  | 5.202  | 0.577 | 0.3813 |
| FBgn0002633 | 860.432 | 10.240 | 0.061 | 0.0006 |
| FBgn0000463 | 130.156 | 9.377  | 0.338 | 0.0955 |
| FBgn0001208 | 731.786 | 30.856 | 0.651 | 0.4525 |
| FBgn0017572 | 15.338  | 2.202  | 0.158 | 0.1223 |
| FBgn0005659 | 671.199 | 20.503 | 0.313 | 0.1080 |
| FBgn0034748 | 15.398  | 1.859  | 0.112 | 0.0954 |
| FBgn0037232 | 38.688  | 3.154  | 0.129 | 0.0311 |
| FBgn0010611 | 28.897  | 2.030  | 0.071 | 0.0190 |
| FBgn0034269 | 761.949 | 19.490 | 0.249 | 0.0554 |

|             |         |        |       |        |
|-------------|---------|--------|-------|--------|
| FBgn0051028 | 833.859 | 8.208  | 0.040 | 0.0015 |
| FBgn0003950 | 21.566  | 2.581  | 0.154 | 0.0595 |
| FBgn0030745 | 784.820 | 14.101 | 0.127 | 0.0040 |
| FBgn0050373 | 16.800  | 4.079  | 0.495 | 0.3248 |
| FBgn0025776 | 24.599  | 4.132  | 0.347 | 0.1761 |
| FBgn0004516 | 37.653  | 2.703  | 0.097 | 0.0202 |
| FBgn0030259 | 16.089  | 3.357  | 0.350 | 0.2183 |
| FBgn0031349 | 811.527 | 21.483 | 0.284 | 0.0514 |
| FBgn0036733 | 31.468  | 3.501  | 0.195 | 0.0665 |
| FBgn0051036 | 99.002  | 4.633  | 0.108 | 0.0241 |
| FBgn0028876 | 53.543  | 1.883  | 0.033 | 0.0112 |
| FBgn0034421 | 725.984 | 24.564 | 0.416 | 0.1517 |
| FBgn0013732 | 124.372 | 5.773  | 0.134 | 0.0234 |
| FBgn0036448 | 827.924 | 11.489 | 0.080 | 0.0045 |
| FBgn0036161 | 33.296  | 4.355  | 0.285 | 0.0787 |
| FBgn0038463 | 22.867  | 3.922  | 0.336 | 0.1735 |
| FBgn0032399 | 733.945 | 26.214 | 0.468 | 0.2073 |
| FBgn0034063 | 726.952 | 18.564 | 0.237 | 0.0351 |
| FBgn0039431 | 17.380  | 2.458  | 0.174 | 0.0946 |
| FBgn0029764 | 66.956  | 5.594  | 0.234 | 0.0445 |
| FBgn0014002 | 718.686 | 9.077  | 0.057 | 0.0037 |
| FBgn0034314 | 26.772  | 2.721  | 0.138 | 0.0649 |
| FBgn0031663 | 17.989  | 2.046  | 0.116 | 0.0763 |
| FBgn0039379 | 654.710 | 12.247 | 0.115 | 0.0053 |
| FBgn0038926 | 34.236  | 4.405  | 0.283 | 0.0702 |
| FBgn0051910 | 151.654 | 7.031  | 0.163 | 0.0280 |
| FBgn0042199 | 870.799 | 10.662 | 0.065 | 0.0013 |
| FBgn0030743 | 36.290  | 3.707  | 0.189 | 0.0645 |
| FBgn0004145 | 35.357  | 2.857  | 0.115 | 0.0231 |
| FBgn0030301 | 731.944 | 17.425 | 0.207 | 0.0194 |
| FBgn0053123 | 47.155  | 2.515  | 0.067 | 0.0244 |
| FBgn0035186 | 661.911 | 21.603 | 0.353 | 0.0961 |
| FBgn0040534 | 18.316  | 2.123  | 0.123 | 0.0829 |
| FBgn0052447 | 36.512  | 4.184  | 0.240 | 0.0632 |
| FBgn0029174 | 797.028 | 11.121 | 0.078 | 0.0044 |
| FBgn0039743 | 14.232  | 2.912  | 0.298 | 0.2341 |
| FBgn0037409 | 56.503  | 5.659  | 0.283 | 0.1013 |
| FBgn0029885 | 84.861  | 3.553  | 0.074 | 0.0195 |
| FBgn0027499 | 779.159 | 38.245 | 0.939 | 0.9042 |
| FBgn0036335 | 29.679  | 3.912  | 0.258 | 0.1034 |
| FBgn0039299 | 54.105  | 8.173  | 0.617 | 0.4248 |
| FBgn0030355 | 737.821 | 21.616 | 0.317 | 0.0706 |
| FBgn0039557 | 8.766   | 2.094  | 0.250 | 0.2395 |
| FBgn0035867 | 79.502  | 4.680  | 0.138 | 0.0125 |
| FBgn0029848 | 20.286  | 3.747  | 0.346 | 0.1574 |
| FBgn0034741 | 12.284  | 3.969  | 0.641 | 0.5515 |
| FBgn0033873 | 805.480 | 16.827 | 0.176 | 0.0331 |
| FBgn0033760 | 732.050 | 19.921 | 0.271 | 0.0436 |
| FBgn0038501 | 39.583  | 2.534  | 0.081 | 0.0373 |
| FBgn0039081 | 596.836 | 11.434 | 0.110 | 0.0026 |
| FBgn0040347 | 727.041 | 11.644 | 0.093 | 0.0119 |
| FBgn0050445 | 18.249  | 3.889  | 0.414 | 0.2776 |
| FBgn0004893 | 73.873  | 8.224  | 0.458 | 0.1992 |
| FBgn0031443 | 9.451   | 2.323  | 0.285 | 0.3069 |

|             |         |        |       |        |
|-------------|---------|--------|-------|--------|
| FBgn0036436 | 20.222  | 2.137  | 0.113 | 0.0554 |
| FBgn0030261 | 820.931 | 10.468 | 0.067 | 0.0008 |
| FBgn0032166 | 807.965 | 10.508 | 0.068 | 0.0017 |
| FBgn0010488 | 26.309  | 2.096  | 0.083 | 0.0456 |
| FBgn0028903 | 14.006  | 1.819  | 0.118 | 0.1166 |
| FBgn0036118 | 41.544  | 4.618  | 0.257 | 0.0516 |
| FBgn0039840 | 84.569  | 7.185  | 0.305 | 0.0815 |
| FBgn0032244 | 667.991 | 20.110 | 0.303 | 0.0688 |
| FBgn0024814 | 48.319  | 2.840  | 0.083 | 0.0152 |
| FBgn0038490 | 26.099  | 4.742  | 0.431 | 0.2061 |
| FBgn0029833 | 39.200  | 5.575  | 0.396 | 0.1551 |
| FBgn0033107 | 88.882  | 3.928  | 0.087 | 0.0071 |
| FBgn0051204 | 21.951  | 4.572  | 0.476 | 0.2970 |
| FBgn0032717 | 716.260 | 22.194 | 0.344 | 0.0897 |
| FBgn0037971 | 56.195  | 4.951  | 0.218 | 0.0324 |
| FBgn0027562 | 122.912 | 3.916  | 0.062 | 0.0175 |
| FBgn0037663 | 6.768   | 1.989  | 0.292 | 0.3213 |
| FBgn0016059 | 168.710 | 7.416  | 0.163 | 0.0168 |
| FBgn0033973 | 133.481 | 6.599  | 0.163 | 0.0098 |
| FBgn0010470 | 734.274 | 17.229 | 0.202 | 0.0174 |
| FBgn0037995 | 11.020  | 1.764  | 0.141 | 0.1554 |
| FBgn0000097 | 19.126  | 1.879  | 0.092 | 0.0600 |
| FBgn0037622 | 144.904 | 3.745  | 0.048 | 0.0041 |
| FBgn0034416 | 19.319  | 2.060  | 0.110 | 0.0545 |
| FBgn0026566 | 18.872  | 2.035  | 0.110 | 0.0719 |
| FBgn0028962 | 900.707 | 14.843 | 0.122 | 0.0037 |
| FBgn0003193 | 673.061 | 15.474 | 0.178 | 0.0256 |
| FBgn0000163 | 7.973   | 3.191  | 0.639 | 0.6009 |
| FBgn0030204 | 873.433 | 11.178 | 0.072 | 0.0013 |
| FBgn0027951 | 6.198   | 2.377  | 0.456 | 0.4917 |
| FBgn0053543 | 15.519  | 1.120  | 0.040 | 0.0554 |
| FBgn0037340 | 14.029  | 1.470  | 0.077 | 0.0710 |
| FBgn0038001 | 38.974  | 3.571  | 0.164 | 0.0504 |
| FBgn0031255 | 4.302   | 2.749  | 0.879 | 0.8985 |
| FBgn0039651 | 859.955 | 9.399  | 0.051 | 0.0030 |
| FBgn0000723 | 35.407  | 2.149  | 0.065 | 0.0137 |
| FBgn0053262 | 725.335 | 22.658 | 0.354 | 0.1671 |
| FBgn0032701 | 730.310 | 26.256 | 0.472 | 0.2114 |
| FBgn0002736 | 214.220 | 7.697  | 0.138 | 0.0141 |
| FBgn0000313 | 14.111  | 2.952  | 0.309 | 0.1868 |
| FBgn0041621 | 23.658  | 5.002  | 0.529 | 0.3172 |
| FBgn0038492 | 160.632 | 15.248 | 0.724 | 0.5657 |
| FBgn0039513 | 690.752 | 16.040 | 0.186 | 0.0426 |
| FBgn0033770 | 35.836  | 3.641  | 0.185 | 0.0383 |
| FBgn0037783 | 51.983  | 3.497  | 0.118 | 0.0145 |
| FBgn0015765 | 148.034 | 3.401  | 0.039 | 0.0049 |
| FBgn0026698 | 26.282  | 3.108  | 0.184 | 0.0863 |
| FBgn0037376 | 29.544  | 2.011  | 0.068 | 0.0344 |
| FBgn0031281 | 770.994 | 17.956 | 0.209 | 0.0237 |
| FBgn0030854 | 816.160 | 12.257 | 0.092 | 0.0047 |
| FBgn0028897 | 30.296  | 3.442  | 0.195 | 0.0735 |
| FBgn0029137 | 30.638  | 1.983  | 0.064 | 0.0378 |
| FBgn0028554 | 25.572  | 1.474  | 0.042 | 0.0258 |
| FBgn0039152 | 12.108  | 2.413  | 0.241 | 0.1685 |

|             |         |        |       |        |
|-------------|---------|--------|-------|--------|
| FBgn0027779 | 29.259  | 1.666  | 0.047 | 0.0202 |
| FBgn0028481 | 77.730  | 5.868  | 0.222 | 0.0332 |
| FBgn0004666 | 31.168  | 3.272  | 0.172 | 0.0653 |
| FBgn0031150 | 19.155  | 3.721  | 0.361 | 0.2203 |
| FBgn0037163 | 573.443 | 15.638 | 0.213 | 0.0215 |
| FBgn0036211 | 633.284 | 21.957 | 0.381 | 0.1193 |
| FBgn0028881 | 9.675   | 4.222  | 0.921 | 0.9047 |
| FBgn0003607 | 607.031 | 16.444 | 0.223 | 0.0367 |
| FBgn0033888 | 715.653 | 13.111 | 0.120 | 0.0321 |
| FBgn0052344 | 34.055  | 4.964  | 0.362 | 0.1836 |
| FBgn0037424 | 22.730  | 3.689  | 0.299 | 0.1577 |
| FBgn0031941 | 847.045 | 15.985 | 0.151 | 0.0069 |
| FBgn0039255 | 776.572 | 22.354 | 0.322 | 0.0738 |
| FBgn0051765 | 884.500 | 16.865 | 0.161 | 0.0081 |
| FBgn0011674 | 757.969 | 19.549 | 0.252 | 0.0357 |
| FBgn0035444 | 794.444 | 20.767 | 0.271 | 0.0451 |
| FBgn0036513 | 706.966 | 9.024  | 0.058 | 0.0011 |
| FBgn0039450 | 496.658 | 18.216 | 0.334 | 0.0917 |
| FBgn0032490 | 174.105 | 13.200 | 0.500 | 0.2456 |
| FBgn0025742 | 15.844  | 2.266  | 0.162 | 0.1197 |
| FBgn0036367 | 88.485  | 4.046  | 0.093 | 0.0107 |
| FBgn0040087 | 10.305  | 1.856  | 0.167 | 0.1680 |
| FBgn0041184 | 569.069 | 11.860 | 0.124 | 0.0259 |
| FBgn0011277 | 53.682  | 6.431  | 0.385 | 0.1322 |
| FBgn0032773 | 740.272 | 17.525 | 0.207 | 0.0194 |
| FBgn0039589 | 22.827  | 1.854  | 0.075 | 0.0507 |
| FBgn0013770 | 811.468 | 17.901 | 0.197 | 0.0223 |
| FBgn0038985 | 798.113 | 20.029 | 0.251 | 0.0353 |
| FBgn0034111 | 19.278  | 2.424  | 0.152 | 0.0948 |
| FBgn0002569 | 21.634  | 5.231  | 0.632 | 0.4646 |
| FBgn0039830 | 20.279  | 4.608  | 0.524 | 0.3292 |
| FBgn0063261 | 17.952  | 4.056  | 0.458 | 0.2841 |
| FBgn0029608 | 28.813  | 5.721  | 0.568 | 0.3571 |
| FBgn0027505 | 726.663 | 20.564 | 0.291 | 0.0551 |
| FBgn0038708 | 768.841 | 14.138 | 0.130 | 0.0042 |
| FBgn0051717 | 39.485  | 4.348  | 0.239 | 0.0514 |
| FBgn0034400 | 104.096 | 7.781  | 0.291 | 0.0559 |
| FBgn0030218 | 773.088 | 13.469 | 0.117 | 0.0082 |
| FBgn0043471 | 9.831   | 2.574  | 0.337 | 0.2771 |
| FBgn0032702 | 13.272  | 2.472  | 0.230 | 0.1742 |
| FBgn0035630 | 29.764  | 2.230  | 0.084 | 0.0191 |
| FBgn0033657 | 767.755 | 19.405 | 0.245 | 0.0364 |
| FBgn0033209 | 35.725  | 4.587  | 0.295 | 0.1058 |
| FBgn0036446 | 23.600  | 2.153  | 0.098 | 0.0499 |
| FBgn0032390 | 23.168  | 3.176  | 0.218 | 0.0728 |
| FBgn0030703 | 22.089  | 3.603  | 0.294 | 0.1246 |
| FBgn0035464 | 665.599 | 11.267 | 0.095 | 0.0151 |
| FBgn0004622 | 50.916  | 4.873  | 0.233 | 0.0590 |
| FBgn0039667 | 12.725  | 2.634  | 0.273 | 0.1969 |
| FBgn0010770 | 548.796 | 30.536 | 0.850 | 0.7638 |
| FBgn0028485 | 777.792 | 16.323 | 0.171 | 0.0138 |
| FBgn0031060 | 30.949  | 3.208  | 0.166 | 0.0492 |
| FBgn0035588 | 740.104 | 10.689 | 0.077 | 0.0100 |
| FBgn0035063 | 93.257  | 4.744  | 0.121 | 0.0148 |

|             |         |        |       |        |
|-------------|---------|--------|-------|--------|
| FBgn0040726 | 28.543  | 4.406  | 0.340 | 0.1331 |
| FBgn0031241 | 16.938  | 2.595  | 0.199 | 0.1372 |
| FBgn0037473 | 791.498 | 8.551  | 0.046 | 0.0069 |
| FBgn0034218 | 24.430  | 5.565  | 0.634 | 0.4692 |
| FBgn0001228 | 37.213  | 8.751  | 1.029 | 0.9577 |
| FBgn0029175 | 756.893 | 12.498 | 0.103 | 0.0043 |
| FBgn0022720 | 112.562 | 6.688  | 0.199 | 0.0396 |
| FBgn0039747 | 36.636  | 5.694  | 0.443 | 0.2248 |
| FBgn0039463 | 754.376 | 12.248 | 0.099 | 0.0107 |
| FBgn0043854 | 9.395   | 1.873  | 0.187 | 0.2236 |
| FBgn0032077 | 8.603   | 2.053  | 0.245 | 0.2561 |
| FBgn0010926 | 619.368 | 18.785 | 0.285 | 0.0716 |
| FBgn0031904 | 76.188  | 4.170  | 0.114 | 0.0428 |
| FBgn0038057 | 680.738 | 14.965 | 0.164 | 0.0121 |
| FBgn0036195 | 729.787 | 22.887 | 0.359 | 0.1010 |
| FBgn0033549 | 24.607  | 2.906  | 0.172 | 0.0903 |
| FBgn0035720 | 755.773 | 5.742  | 0.022 | 0.0124 |
| FBgn0035755 | 752.787 | 15.197 | 0.153 | 0.0091 |
| FBgn0034483 | 767.165 | 14.630 | 0.140 | 0.0212 |
| FBgn0033092 | 105.811 | 9.209  | 0.401 | 0.1566 |
| FBgn0033698 | 161.715 | 5.686  | 0.100 | 0.0081 |
| FBgn0013717 | 107.834 | 7.159  | 0.238 | 0.0303 |
| FBgn0016698 | 30.290  | 3.777  | 0.236 | 0.0799 |
| FBgn0037777 | 14.589  | 2.754  | 0.260 | 0.1743 |
| FBgn0033887 | 45.723  | 4.322  | 0.204 | 0.0509 |
| FBgn0036951 | 111.575 | 7.267  | 0.237 | 0.0301 |
| FBgn0033614 | 54.091  | 4.041  | 0.151 | 0.0249 |
| FBgn0005632 | 850.308 | 10.388 | 0.063 | 0.0020 |
| FBgn0028341 | 799.454 | 20.192 | 0.255 | 0.0370 |
| FBgn0037631 | 716.233 | 19.240 | 0.258 | 0.0523 |
| FBgn0026239 | 22.629  | 1.965  | 0.085 | 0.0560 |
| FBgn0033124 | 37.898  | 5.405  | 0.385 | 0.1432 |
| FBgn0030001 | 38.822  | 3.670  | 0.173 | 0.0543 |
| FBgn0031106 | 98.245  | 7.225  | 0.266 | 0.0580 |
| FBgn0023212 | 675.784 | 18.663 | 0.258 | 0.0387 |
| FBgn0037646 | 43.284  | 5.515  | 0.351 | 0.1680 |
| FBgn0033802 | 868.693 | 5.844  | 0.020 | 0.0026 |
| FBgn0033269 | 22.657  | 2.214  | 0.108 | 0.0654 |
| FBgn0033400 | 21.079  | 2.242  | 0.119 | 0.0591 |
| FBgn0017456 | 110.865 | 5.699  | 0.146 | 0.0279 |
| FBgn0033155 | 784.939 | 17.630 | 0.198 | 0.0178 |
| FBgn0035936 | 744.016 | 17.938 | 0.216 | 0.0384 |
| FBgn0000057 | 813.482 | 14.998 | 0.138 | 0.0052 |
| FBgn0039554 | 52.526  | 2.773  | 0.073 | 0.0132 |
| FBgn0001565 | 20.198  | 3.946  | 0.385 | 0.2220 |
| FBgn0027841 | 791.061 | 14.341 | 0.130 | 0.0258 |
| FBgn0031975 | 28.042  | 3.016  | 0.162 | 0.0736 |
| FBgn0026741 | 809.937 | 12.660 | 0.099 | 0.0039 |
| FBgn0032153 | 36.835  | 6.133  | 0.511 | 0.2998 |
| FBgn0034569 | 749.802 | 18.016 | 0.216 | 0.0215 |
| FBgn0030481 | 540.332 | 9.300  | 0.080 | 0.0120 |
| FBgn0037415 | 748.253 | 17.555 | 0.206 | 0.0559 |
| FBgn0052843 | 30.928  | 4.311  | 0.300 | 0.1133 |
| FBgn0038422 | 31.307  | 3.729  | 0.222 | 0.0810 |

|             |         |        |       |        |
|-------------|---------|--------|-------|--------|
| FBgn0002735 | 18.293  | 2.685  | 0.197 | 0.1333 |
| FBgn0051232 | 29.549  | 4.100  | 0.284 | 0.0963 |
| FBgn0032297 | 19.322  | 2.830  | 0.207 | 0.0969 |
| FBgn0031474 | 601.842 | 12.901 | 0.138 | 0.0309 |
| FBgn0050183 | 29.924  | 1.819  | 0.055 | 0.0269 |
| FBgn0023536 | 22.525  | 2.004  | 0.089 | 0.0429 |
| FBgn0027600 | 19.597  | 3.112  | 0.247 | 0.1561 |
| FBgn0028901 | 6.475   | 4.609  | 1.640 | 0.4395 |
| FBgn0033636 | 24.375  | 2.638  | 0.143 | 0.0760 |
| FBgn0038959 | 769.232 | 19.259 | 0.241 | 0.0315 |
| FBgn0033050 | 57.513  | 4.864  | 0.206 | 0.0247 |
| FBgn0039686 | 227.755 | 12.708 | 0.355 | 0.0977 |
| FBgn0039069 | 13.234  | 2.324  | 0.204 | 0.1828 |
| FBgn0039219 | 4.085   | 1.498  | 0.275 | 0.3746 |
| FBgn0035839 | 43.266  | 4.724  | 0.258 | 0.0774 |
| FBgn0022702 | 68.581  | 5.957  | 0.259 | 0.0458 |
| FBgn0035347 | 8.319   | 1.036  | 0.065 | 0.0931 |
| FBgn0046876 | 14.122  | 3.377  | 0.404 | 0.2788 |
| FBgn0005626 | 793.265 | 14.699 | 0.136 | 0.0227 |
| FBgn0030670 | 718.071 | 10.131 | 0.071 | 0.0189 |
| FBgn0034184 | 835.720 | 14.957 | 0.134 | 0.0074 |
| FBgn0024188 | 3.704   | 1.823  | 0.448 | 0.5380 |
| FBgn0000063 | 20.467  | 3.611  | 0.319 | 0.1531 |
| FBgn0039188 | 732.388 | 19.734 | 0.266 | 0.0420 |
| FBgn0035959 | 795.766 | 10.252 | 0.066 | 0.0014 |
| FBgn0027564 | 852.065 | 13.880 | 0.113 | 0.0097 |
| FBgn0030653 | 897.034 | 9.406  | 0.049 | 0.0036 |
| FBgn0010083 | 16.826  | 2.365  | 0.166 | 0.1011 |
| FBgn0031496 | 27.988  | 4.011  | 0.287 | 0.1229 |
| FBgn0032293 | 748.309 | 15.282 | 0.156 | 0.0106 |
| FBgn0015929 | 104.582 | 4.148  | 0.082 | 0.0046 |
| FBgn0034136 | 683.215 | 18.625 | 0.254 | 0.0635 |
| FBgn0016794 | 652.006 | 17.544 | 0.236 | 0.0424 |
| FBgn0032741 | 768.675 | 20.143 | 0.264 | 0.0410 |
| FBgn0032021 | 70.613  | 4.926  | 0.172 | 0.0209 |
| FBgn0032790 | 12.411  | 1.395  | 0.078 | 0.0974 |
| FBgn0036289 | 31.938  | 3.042  | 0.145 | 0.0442 |
| FBgn0034989 | 26.073  | 2.007  | 0.077 | 0.0289 |
| FBgn0030877 | 48.673  | 4.281  | 0.188 | 0.0593 |
| FBgn0036490 | 737.044 | 9.907  | 0.067 | 0.0149 |
| FBgn0033267 | 40.245  | 5.543  | 0.382 | 0.1371 |
| FBgn0015320 | 864.872 | 8.623  | 0.043 | 0.0015 |
| FBgn0047114 | 27.485  | 3.634  | 0.240 | 0.0876 |
| FBgn0028835 | 747.188 | 8.183  | 0.045 | 0.0125 |
| FBgn0037023 | 23.094  | 3.329  | 0.240 | 0.0869 |
| FBgn0037244 | 90.059  | 3.051  | 0.052 | 0.0023 |
| FBgn0040321 | 704.058 | 16.403 | 0.191 | 0.0224 |
| FBgn0051976 | 18.307  | 6.285  | 1.079 | 0.8971 |
| FBgn0003425 | 721.096 | 15.429 | 0.165 | 0.0097 |
| FBgn0051805 | 6.956   | 1.921  | 0.265 | 0.3020 |
| FBgn0030797 | 565.985 | 29.100 | 0.748 | 0.6042 |
| FBgn0011695 | 20.240  | 4.751  | 0.558 | 0.3948 |
| FBgn0010399 | 22.460  | 2.904  | 0.188 | 0.1014 |
| FBgn0013763 | 780.887 | 16.674 | 0.178 | 0.0135 |



|             |         |        |       |        |
|-------------|---------|--------|-------|--------|
| FBgn0030870 | 754.944 | 12.904 | 0.110 | 0.0068 |
| FBgn0027103 | 858.959 | 8.870  | 0.046 | 0.0010 |
| FBgn0036299 | 21.277  | 3.969  | 0.370 | 0.1722 |
| FBgn0011836 | 721.889 | 12.382 | 0.106 | 0.0025 |
| FBgn0053138 | 86.451  | 8.832  | 0.451 | 0.1911 |
| FBgn0039642 | 888.374 | 12.745 | 0.091 | 0.0040 |
| FBgn0032030 | 781.691 | 16.525 | 0.175 | 0.0117 |
| FBgn0003071 | 31.213  | 3.231  | 0.167 | 0.0708 |
| FBgn0029979 | 105.068 | 5.936  | 0.168 | 0.0142 |
| FBgn0034971 | 29.412  | 3.821  | 0.248 | 0.0751 |
| FBgn0010338 | 102.235 | 3.691  | 0.067 | 0.0037 |
| FBgn0038328 | 15.880  | 1.710  | 0.092 | 0.0868 |
| FBgn0038419 | 17.729  | 3.789  | 0.405 | 0.2166 |
| FBgn0035874 | 697.439 | 15.301 | 0.168 | 0.0286 |
| FBgn0037770 | 764.470 | 11.145 | 0.081 | 0.0094 |
| FBgn0039306 | 96.830  | 4.939  | 0.126 | 0.0126 |
| FBgn0034572 | 41.616  | 3.862  | 0.179 | 0.0305 |
| FBgn0032246 | 22.444  | 2.020  | 0.091 | 0.0515 |
| FBgn0034401 | 9.419   | 2.313  | 0.284 | 0.2421 |
| FBgn0053224 | 16.978  | 2.563  | 0.194 | 0.1041 |
| FBgn0002777 | 914.276 | 9.379  | 0.048 | 0.0007 |
| FBgn0031435 | 19.988  | 4.901  | 0.601 | 0.4405 |
| FBgn0039157 | 17.188  | 2.917  | 0.247 | 0.1334 |
| FBgn0051265 | 486.239 | 13.698 | 0.193 | 0.0199 |
| FBgn0002576 | 90.958  | 6.512  | 0.233 | 0.0307 |
| FBgn0038053 | 42.836  | 2.994  | 0.105 | 0.0266 |
| FBgn0036348 | 24.490  | 5.164  | 0.544 | 0.3316 |
| FBgn0035488 | 799.747 | 18.606 | 0.216 | 0.0228 |
| FBgn0024941 | 909.928 | 5.416  | 0.016 | 0.0002 |
| FBgn0038140 | 65.435  | 6.740  | 0.347 | 0.1335 |
| FBgn0035523 | 884.140 | 12.575 | 0.089 | 0.0019 |
| FBgn0015287 | 17.137  | 2.824  | 0.233 | 0.1243 |
| FBgn0052831 | 24.436  | 3.974  | 0.323 | 0.1717 |
| FBgn0026620 | 21.264  | 1.624  | 0.062 | 0.0466 |
| FBgn0033542 | 12.200  | 3.021  | 0.374 | 0.2695 |
| FBgn0051738 | 21.414  | 3.469  | 0.281 | 0.1304 |
| FBgn0016684 | 762.321 | 19.035 | 0.238 | 0.0292 |
| FBgn0038739 | 25.138  | 3.241  | 0.209 | 0.0649 |
| FBgn0004507 | 874.398 | 11.251 | 0.072 | 0.0021 |
| FBgn0039833 | 77.533  | 7.927  | 0.405 | 0.1451 |
| FBgn0036880 | 116.970 | 9.243  | 0.365 | 0.1094 |
| FBgn0039771 | 37.411  | 7.183  | 0.690 | 0.5447 |
| FBgn0031461 | 747.955 | 23.816 | 0.379 | 0.1366 |
| FBgn0040629 | 7.968   | 3.264  | 0.669 | 0.6552 |
| FBgn0052343 | 14.608  | 2.464  | 0.208 | 0.1436 |
| FBgn0050196 | 103.158 | 9.564  | 0.443 | 0.1889 |
| FBgn0035414 | 166.863 | 9.534  | 0.272 | 0.0472 |
| FBgn0031485 | 42.781  | 5.844  | 0.399 | 0.1713 |
| FBgn0014009 | 17.430  | 1.766  | 0.090 | 0.0562 |
| FBgn0028689 | 23.226  | 3.476  | 0.260 | 0.1152 |
| FBgn0051855 | 914.666 | 6.124  | 0.021 | 0.0035 |
| FBgn0036781 | 19.180  | 4.721  | 0.581 | 0.4200 |
| FBgn0053505 | 857.557 | 20.420 | 0.243 | 0.0319 |
| FBgn0002069 | 13.170  | 1.902  | 0.137 | 0.1354 |

|             |         |        |       |        |
|-------------|---------|--------|-------|--------|
| FBgn0020245 | 861.537 | 12.486 | 0.090 | 0.0121 |
| FBgn0001202 | 17.143  | 1.428  | 0.059 | 0.0500 |
| FBgn0032176 | 21.215  | 2.373  | 0.133 | 0.0570 |
| FBgn0025633 | 29.469  | 5.155  | 0.451 | 0.2303 |
| FBgn0028963 | 40.407  | 2.463  | 0.075 | 0.0114 |
| FBgn0039511 | 20.898  | 1.651  | 0.065 | 0.0383 |
| FBgn0036127 | 72.562  | 5.847  | 0.236 | 0.0388 |
| FBgn0015561 | 815.046 | 9.918  | 0.060 | 0.0033 |
| FBgn0010078 | 29.590  | 3.885  | 0.255 | 0.0892 |
| FBgn0039491 | 11.721  | 2.635  | 0.296 | 0.2481 |
| FBgn0037766 | 657.016 | 11.991 | 0.109 | 0.0036 |
| FBgn0028700 | 44.123  | 3.871  | 0.170 | 0.0341 |
| FBgn0030074 | 12.906  | 3.649  | 0.516 | 0.4251 |
| FBgn0036773 | 38.015  | 3.245  | 0.138 | 0.0404 |
| FBgn0031548 | 12.575  | 4.436  | 0.782 | 0.7057 |
| FBgn0033901 | 8.725   | 1.109  | 0.070 | 0.1039 |
| FBgn0032474 | 76.587  | 4.613  | 0.139 | 0.0117 |
| FBgn0027780 | 24.829  | 2.231  | 0.100 | 0.0410 |
| FBgn0051342 | 19.623  | 2.624  | 0.175 | 0.0817 |
| FBgn0031405 | 28.046  | 3.137  | 0.175 | 0.0529 |
| FBgn0036297 | 10.771  | 2.288  | 0.243 | 0.1863 |
| FBgn0028418 | 35.680  | 3.914  | 0.215 | 0.0671 |
| FBgn0037548 | 20.690  | 3.244  | 0.254 | 0.1354 |
| FBgn0035918 | 25.798  | 5.387  | 0.562 | 0.3821 |
| FBgn0017397 | 28.524  | 3.999  | 0.280 | 0.1334 |
| FBgn0034978 | 14.759  | 2.637  | 0.236 | 0.1633 |
| FBgn0043578 | 24.319  | 5.145  | 0.544 | 0.3587 |
| FBgn0030804 | 27.293  | 5.569  | 0.568 | 0.3783 |
| FBgn0027527 | 640.533 | 15.495 | 0.187 | 0.0165 |
| FBgn0029502 | 217.963 | 7.810  | 0.140 | 0.0077 |
| FBgn0037833 | 25.508  | 4.690  | 0.431 | 0.2289 |
| FBgn0033809 | 62.292  | 2.906  | 0.068 | 0.0087 |
| FBgn0035911 | 779.912 | 19.065 | 0.233 | 0.0435 |
| FBgn0023211 | 48.875  | 3.153  | 0.102 | 0.0195 |
| FBgn0050271 | 27.717  | 3.589  | 0.232 | 0.0745 |
| FBgn0051004 | 602.911 | 13.969 | 0.162 | 0.0510 |
| FBgn0030167 | 29.293  | 6.125  | 0.640 | 0.4586 |
| FBgn0034418 | 723.867 | 9.643  | 0.064 | 0.0053 |
| FBgn0039068 | 17.677  | 2.904  | 0.239 | 0.1256 |
| FBgn0035733 | 64.306  | 6.369  | 0.315 | 0.0855 |
| FBgn0042641 | 914.873 | 5.045  | 0.014 | 0.0011 |
| FBgn0030766 | 22.262  | 4.233  | 0.402 | 0.2029 |
| FBgn0037797 | 11.163  | 2.801  | 0.352 | 0.2685 |
| FBgn0031307 | 23.129  | 3.846  | 0.320 | 0.1342 |
| FBgn0037235 | 22.054  | 2.521  | 0.144 | 0.0520 |
| FBgn0017577 | 53.005  | 4.662  | 0.205 | 0.0372 |
| FBgn0050281 | 19.686  | 7.563  | 1.453 | 0.4789 |
| FBgn0031969 | 551.102 | 15.191 | 0.209 | 0.0465 |
| FBgn0028482 | 34.275  | 2.084  | 0.063 | 0.0268 |
| FBgn0036909 | 26.945  | 3.939  | 0.288 | 0.1142 |
| FBgn0032797 | 18.555  | 2.209  | 0.131 | 0.0622 |
| FBgn0031718 | 19.038  | 3.948  | 0.409 | 0.2606 |
| FBgn0011769 | 3.472   | 1.112  | 0.178 | 0.2819 |
| FBgn0041247 | 837.578 | 16.786 | 0.168 | 0.0100 |

|             |         |        |       |        |
|-------------|---------|--------|-------|--------|
| FBgn0033086 | 24.341  | 2.645  | 0.144 | 0.0685 |
| FBgn0032922 | 73.767  | 5.810  | 0.229 | 0.0430 |
| FBgn0030495 | 20.966  | 3.557  | 0.302 | 0.1703 |
| FBgn0051126 | 665.385 | 15.249 | 0.175 | 0.0468 |
| FBgn0035452 | 14.545  | 2.961  | 0.301 | 0.1847 |
| FBgn0037250 | 20.182  | 2.679  | 0.178 | 0.0800 |
| FBgn0033154 | 740.282 | 14.980 | 0.152 | 0.0084 |
| FBgn0000394 | 783.731 | 17.893 | 0.204 | 0.0185 |
| FBgn0037304 | 12.831  | 1.703  | 0.113 | 0.1128 |
| FBgn0036936 | 788.632 | 13.243 | 0.111 | 0.0092 |
| FBgn0028669 | 617.840 | 19.097 | 0.295 | 0.0672 |
| FBgn0028852 | 12.014  | 3.614  | 0.544 | 0.4282 |
| FBgn0014465 | 17.086  | 4.658  | 0.635 | 0.4950 |
| FBgn0032974 | 20.756  | 2.460  | 0.146 | 0.0939 |
| FBgn0034283 | 411.757 | 24.476 | 0.727 | 0.6158 |
| FBgn0052068 | 32.712  | 3.271  | 0.164 | 0.0375 |
| FBgn0030162 | 737.002 | 22.417 | 0.341 | 0.0936 |
| FBgn0034001 | 744.153 | 12.513 | 0.105 | 0.0023 |
| FBgn0008635 | 10.072  | 1.465  | 0.107 | 0.1303 |
| FBgn0041246 | 681.210 | 16.425 | 0.198 | 0.0167 |
| FBgn0038796 | 684.463 | 13.709 | 0.137 | 0.0088 |
| FBgn0037236 | 24.283  | 1.986  | 0.081 | 0.0406 |
| FBgn0032487 | 800.869 | 23.681 | 0.350 | 0.0943 |
| FBgn0024943 | 747.023 | 12.212 | 0.100 | 0.0026 |
| FBgn0038977 | 115.019 | 4.203  | 0.077 | 0.0036 |
| FBgn0003475 | 25.946  | 1.639  | 0.052 | 0.0279 |
| FBgn0037294 | 806.051 | 18.724 | 0.217 | 0.0340 |
| FBgn0038592 | 582.033 | 16.068 | 0.222 | 0.0289 |
| FBgn0036564 | 104.306 | 6.305  | 0.191 | 0.0160 |
| FBgn0052196 | 12.359  | 6.487  | 1.703 | 0.3192 |
| FBgn0029696 | 4.934   | 4.345  | 1.913 | 0.3245 |
| FBgn0010417 | 22.540  | 3.248  | 0.234 | 0.1183 |
| FBgn0035593 | 16.635  | 1.458  | 0.064 | 0.0598 |
| FBgn0004436 | 31.672  | 6.837  | 0.738 | 0.6165 |
| FBgn0029148 | 719.271 | 21.303 | 0.315 | 0.1464 |
| FBgn0043900 | 784.634 | 21.408 | 0.292 | 0.0557 |
| FBgn0037630 | 759.656 | 15.447 | 0.157 | 0.0165 |
| FBgn0035385 | 47.283  | 5.551  | 0.326 | 0.0854 |
| FBgn0031005 | 669.267 | 25.982 | 0.504 | 0.3262 |
| FBgn0005533 | 559.507 | 21.079 | 0.397 | 0.1977 |
| FBgn0022023 | 13.799  | 2.162  | 0.169 | 0.1610 |
| FBgn0037999 | 29.104  | 2.509  | 0.108 | 0.0519 |
| FBgn0036111 | 94.315  | 4.858  | 0.125 | 0.0134 |
| FBgn0041092 | 762.948 | 19.355 | 0.245 | 0.0329 |
| FBgn0050197 | 43.101  | 3.033  | 0.107 | 0.0315 |
| FBgn0029525 | 54.075  | 5.079  | 0.238 | 0.0384 |
| FBgn0040505 | 16.898  | 3.612  | 0.386 | 0.2267 |
| FBgn0032847 | 110.127 | 6.601  | 0.198 | 0.0282 |
| FBgn0031224 | 10.758  | 2.779  | 0.359 | 0.3218 |
| FBgn0020280 | 4.471   | 1.981  | 0.439 | 0.5029 |
| FBgn0033380 | 662.590 | 14.444 | 0.157 | 0.0196 |
| FBgn0033823 | 15.237  | 2.060  | 0.139 | 0.1008 |
| FBgn0039311 | 24.398  | 3.817  | 0.299 | 0.1552 |
| FBgn0034264 | 17.795  | 3.644  | 0.373 | 0.1994 |

|             |         |        |       |        |
|-------------|---------|--------|-------|--------|
| FBgn0035202 | 733.784 | 6.830  | 0.032 | 0.0082 |
| FBgn0039339 | 7.655   | 1.671  | 0.182 | 0.2113 |
| FBgn0011640 | 102.524 | 5.172  | 0.130 | 0.0095 |
| FBgn0035094 | 19.592  | 3.719  | 0.353 | 0.1897 |
| FBgn0039620 | 21.086  | 1.637  | 0.064 | 0.0500 |
| FBgn0033348 | 20.104  | 3.159  | 0.248 | 0.1239 |
| FBgn0037798 | 19.677  | 2.839  | 0.205 | 0.1193 |
| FBgn0034392 | 13.811  | 2.804  | 0.285 | 0.1770 |
| FBgn0033388 | 6.903   | 2.640  | 0.505 | 0.5008 |
| FBgn0028387 | 757.048 | 22.775 | 0.343 | 0.0887 |
| FBgn0038684 | 69.904  | 7.256  | 0.377 | 0.1450 |
| FBgn0035438 | 643.193 | 18.897 | 0.278 | 0.0468 |
| FBgn0011297 | 705.381 | 18.282 | 0.237 | 0.0298 |
| FBgn0027786 | 863.233 | 8.255  | 0.039 | 0.0011 |
| FBgn0051407 | 8.232   | 1.668  | 0.169 | 0.2028 |
| FBgn0053556 | 748.387 | 22.605 | 0.341 | 0.1033 |
| FBgn0010223 | 7.296   | 2.069  | 0.293 | 0.3143 |
| FBgn0011013 | 736.833 | 15.361 | 0.160 | 0.0200 |
| FBgn0035325 | 68.286  | 5.728  | 0.240 | 0.0495 |
| FBgn0027518 | 745.964 | 18.125 | 0.220 | 0.0336 |
| FBgn0039089 | 79.225  | 3.691  | 0.086 | 0.0109 |
| FBgn0026761 | 30.053  | 2.174  | 0.079 | 0.0239 |
| FBgn0030741 | 12.645  | 2.841  | 0.319 | 0.2166 |
| FBgn0039752 | 650.687 | 26.895 | 0.556 | 0.3064 |
| FBgn0036316 | 787.954 | 8.998  | 0.051 | 0.0022 |
| FBgn0034094 | 680.545 | 20.865 | 0.320 | 0.0727 |
| FBgn0040827 | 18.466  | 7.122  | 1.374 | 0.5622 |
| FBgn0033522 | 691.113 | 7.897  | 0.045 | 0.0043 |
| FBgn0036379 | 67.797  | 6.351  | 0.298 | 0.0889 |
| FBgn0040512 | 129.997 | 5.599  | 0.121 | 0.0060 |
| FBgn0032193 | 120.158 | 7.473  | 0.232 | 0.0303 |
| FBgn0035049 | 780.064 | 12.028 | 0.093 | 0.0094 |
| FBgn0035024 | 520.025 | 9.059  | 0.079 | 0.0106 |
| FBgn0041224 | 636.427 | 23.545 | 0.436 | 0.1719 |
| FBgn0014135 | 161.959 | 11.260 | 0.391 | 0.1307 |
| FBgn0036282 | 24.900  | 3.541  | 0.252 | 0.1140 |
| FBgn0036237 | 30.470  | 2.361  | 0.091 | 0.0414 |
| FBgn0032453 | 736.231 | 20.016 | 0.272 | 0.1138 |
| FBgn0022985 | 818.437 | 9.975  | 0.061 | 0.0029 |
| FBgn0032160 | 32.575  | 3.967  | 0.242 | 0.0716 |
| FBgn0032506 | 32.652  | 5.194  | 0.413 | 0.1846 |
| FBgn0038172 | 532.268 | 12.856 | 0.155 | 0.0080 |
| FBgn0039202 | 810.233 | 12.226 | 0.092 | 0.0021 |
| FBgn0037481 | 31.001  | 2.559  | 0.106 | 0.0398 |
| FBgn0039560 | 102.231 | 6.174  | 0.186 | 0.0334 |
| FBgn0000274 | 24.304  | 3.826  | 0.301 | 0.1572 |
| FBgn0015032 | 26.164  | 3.883  | 0.288 | 0.1372 |
| FBgn0037489 | 28.063  | 3.003  | 0.161 | 0.0533 |
| FBgn0036476 | 34.916  | 3.618  | 0.187 | 0.0467 |
| FBgn0036484 | 874.874 | 8.113  | 0.038 | 0.0021 |
| FBgn0020623 | 5.091   | 1.855  | 0.338 | 0.4183 |
| FBgn0034176 | 21.627  | 3.903  | 0.352 | 0.1720 |
| FBgn0030448 | 9.380   | 1.781  | 0.169 | 0.1792 |
| FBgn0032731 | 16.572  | 1.739  | 0.091 | 0.0710 |

|             |         |        |       |        |
|-------------|---------|--------|-------|--------|
| FBgn0014963 | 28.986  | 4.717  | 0.384 | 0.1777 |
| FBgn0036587 | 10.505  | 2.803  | 0.374 | 0.2954 |
| FBgn0001205 | 764.483 | 17.183 | 0.193 | 0.0151 |
| FBgn0013983 | 827.003 | 10.640 | 0.068 | 0.0195 |
| FBgn0013746 | 26.585  | 3.502  | 0.231 | 0.1053 |
| FBgn0052269 | 11.381  | 1.388  | 0.085 | 0.1008 |
| FBgn0038753 | 6.480   | 3.215  | 0.797 | 0.7945 |
| FBgn0050158 | 104.608 | 5.399  | 0.139 | 0.0140 |
| FBgn0029805 | 23.897  | 5.343  | 0.597 | 0.4128 |
| FBgn0036192 | 11.477  | 3.023  | 0.398 | 0.3232 |
| FBgn0038814 | 17.090  | 4.226  | 0.522 | 0.3695 |
| FBgn0027542 | 56.388  | 3.797  | 0.128 | 0.0167 |
| FBgn0017482 | 56.606  | 5.850  | 0.302 | 0.0909 |
| FBgn0003656 | 27.303  | 3.309  | 0.200 | 0.0982 |
| FBgn0038400 | 603.891 | 22.251 | 0.410 | 0.1462 |
| FBgn0035644 | 18.380  | 2.671  | 0.194 | 0.1102 |
| FBgn0033286 | 51.786  | 3.679  | 0.131 | 0.0232 |
| FBgn0010114 | 746.147 | 16.846 | 0.190 | 0.0320 |
| FBgn0031262 | 855.678 | 15.044 | 0.132 | 0.0044 |
| FBgn0004363 | 45.338  | 4.236  | 0.198 | 0.0320 |
| FBgn0038742 | 14.100  | 3.261  | 0.377 | 0.2875 |
| FBgn0036216 | 21.609  | 2.447  | 0.139 | 0.0819 |
| FBgn0031719 | 48.899  | 7.742  | 0.613 | 0.4028 |
| FBgn0031895 | 3.840   | 1.185  | 0.183 | 0.2836 |
| FBgn0031323 | 36.231  | 4.088  | 0.231 | 0.0633 |
| FBgn0000121 | 668.167 | 16.403 | 0.201 | 0.0605 |
| FBgn0028535 | 53.349  | 3.294  | 0.102 | 0.0114 |
| FBgn0032008 | 733.914 | 17.065 | 0.198 | 0.0203 |
| FBgn0038275 | 514.814 | 10.453 | 0.106 | 0.0076 |
| FBgn0031812 | 167.097 | 6.557  | 0.129 | 0.0276 |
| FBgn0039715 | 32.583  | 2.898  | 0.129 | 0.0522 |
| FBgn0053936 | 742.601 | 19.454 | 0.255 | 0.0376 |
| FBgn0031736 | 80.140  | 5.034  | 0.158 | 0.0298 |
| FBgn0025613 | 789.206 | 24.274 | 0.373 | 0.1132 |
| FBgn0034248 | 20.937  | 6.382  | 0.973 | 0.9612 |
| FBgn0035622 | 34.274  | 2.972  | 0.129 | 0.0358 |
| FBgn0027074 | 20.539  | 4.257  | 0.441 | 0.2688 |
| FBgn0052574 | 14.961  | 2.702  | 0.244 | 0.1844 |
| FBgn0032075 | 24.562  | 1.834  | 0.068 | 0.0467 |
| FBgn0030286 | 40.394  | 2.166  | 0.058 | 0.0155 |
| FBgn0001967 | 23.049  | 1.915  | 0.080 | 0.0289 |
| FBgn0032168 | 812.123 | 19.006 | 0.222 | 0.0241 |
| FBgn0036254 | 782.608 | 11.044 | 0.078 | 0.0060 |
| FBgn0038863 | 840.490 | 14.327 | 0.122 | 0.0058 |
| FBgn0020392 | 780.157 | 15.944 | 0.163 | 0.0132 |
| FBgn0030148 | 18.148  | 3.383  | 0.315 | 0.1843 |
| FBgn0038586 | 14.668  | 2.611  | 0.232 | 0.1722 |
| FBgn0030771 | 49.176  | 4.943  | 0.248 | 0.0494 |
| FBgn0035537 | 616.025 | 23.834 | 0.461 | 0.1991 |
| FBgn0031458 | 27.766  | 3.525  | 0.224 | 0.0673 |
| FBgn0030292 | 595.962 | 18.775 | 0.296 | 0.0608 |
| FBgn0031858 | 118.337 | 6.462  | 0.176 | 0.0306 |
| FBgn0033196 | 68.989  | 3.085  | 0.069 | 0.0115 |
| FBgn0032339 | 23.931  | 2.263  | 0.107 | 0.0434 |

|             |         |        |       |        |
|-------------|---------|--------|-------|--------|
| FBgn0031763 | 19.937  | 4.000  | 0.401 | 0.2166 |
| FBgn0015777 | 713.521 | 36.506 | 0.934 | 0.8992 |
| FBgn0033732 | 10.641  | 3.107  | 0.454 | 0.3909 |
| FBgn0034914 | 860.863 | 8.682  | 0.044 | 0.0009 |
| FBgn0034763 | 56.808  | 4.689  | 0.194 | 0.0294 |
| FBgn0025687 | 13.693  | 2.275  | 0.189 | 0.1273 |
| FBgn0038482 | 144.271 | 7.414  | 0.191 | 0.0289 |
| FBgn0030054 | 698.528 | 18.406 | 0.243 | 0.0316 |
| FBgn0016061 | 124.663 | 6.560  | 0.173 | 0.0202 |
| FBgn0032139 | 598.858 | 24.780 | 0.513 | 0.2603 |
| FBgn0032646 | 719.041 | 14.724 | 0.151 | 0.0347 |
| FBgn0031559 | 97.930  | 6.614  | 0.223 | 0.0364 |
| FBgn0031855 | 18.859  | 4.256  | 0.480 | 0.2904 |
| FBgn0036263 | 110.212 | 8.504  | 0.328 | 0.1169 |
| FBgn0012066 | 685.110 | 21.011 | 0.322 | 0.0743 |
| FBgn0037845 | 24.143  | 2.435  | 0.123 | 0.0616 |
| FBgn0033929 | 18.131  | 4.178  | 0.481 | 0.3357 |
| FBgn0033784 | 7.599   | 1.162  | 0.089 | 0.1339 |
| FBgn0029974 | 23.797  | 3.221  | 0.218 | 0.0736 |
| FBgn0033379 | 14.230  | 1.829  | 0.118 | 0.0944 |
| FBgn0040064 | 34.537  | 3.246  | 0.153 | 0.0465 |
| FBgn0037387 | 14.928  | 3.659  | 0.448 | 0.3300 |
| FBgn0039201 | 87.197  | 8.078  | 0.374 | 0.1457 |
| FBgn0036240 | 101.555 | 4.849  | 0.116 | 0.0192 |
| FBgn0032849 | 33.094  | 2.798  | 0.118 | 0.0420 |
| FBgn0010421 | 32.704  | 4.178  | 0.267 | 0.0710 |
| FBgn0028577 | 37.183  | 2.547  | 0.087 | 0.0197 |
| FBgn0032132 | 17.626  | 4.532  | 0.583 | 0.4102 |
| FBgn0038205 | 21.600  | 4.540  | 0.477 | 0.3009 |
| FBgn0032745 | 14.328  | 2.614  | 0.239 | 0.1838 |
| FBgn0036974 | 21.179  | 3.337  | 0.263 | 0.1425 |
| FBgn0028539 | 21.894  | 2.993  | 0.205 | 0.0862 |
| FBgn0032524 | 87.810  | 3.651  | 0.076 | 0.0067 |
| FBgn0035727 | 28.121  | 1.695  | 0.051 | 0.0194 |
| FBgn0051102 | 26.295  | 3.123  | 0.185 | 0.0732 |
| FBgn0033347 | 16.662  | 4.945  | 0.734 | 0.6297 |
| FBgn0028919 | 541.999 | 24.328 | 0.546 | 0.3036 |
| FBgn0031834 | 23.877  | 1.707  | 0.061 | 0.0288 |
| FBgn0032663 | 79.840  | 3.223  | 0.065 | 0.0064 |
| FBgn0031940 | 685.938 | 30.162 | 0.663 | 0.4718 |
| FBgn0035318 | 20.442  | 4.241  | 0.440 | 0.2573 |
| FBgn0039525 | 22.347  | 2.664  | 0.159 | 0.0915 |
| FBgn0050181 | 734.366 | 18.528 | 0.234 | 0.0494 |
| FBgn0037781 | 83.231  | 1.691  | 0.017 | 0.0078 |
| FBgn0031625 | 11.518  | 2.407  | 0.251 | 0.2507 |
| FBgn0051118 | 819.745 | 18.081 | 0.199 | 0.0180 |
| FBgn0035592 | 50.261  | 6.071  | 0.367 | 0.1334 |
| FBgn0038098 | 16.754  | 2.121  | 0.134 | 0.0774 |
| FBgn0038106 | 42.957  | 4.723  | 0.260 | 0.0520 |
| FBgn0038706 | 28.450  | 3.302  | 0.192 | 0.0574 |
| FBgn0051267 | 7.526   | 1.504  | 0.150 | 0.1788 |
| FBgn0029663 | 41.550  | 1.985  | 0.047 | 0.0117 |
| FBgn0052686 | 28.239  | 6.486  | 0.745 | 0.6152 |
| FBgn0035355 | 25.729  | 3.907  | 0.297 | 0.1295 |

|             |         |        |       |        |
|-------------|---------|--------|-------|--------|
| FBgn0035165 | 20.127  | 3.179  | 0.251 | 0.1529 |
| FBgn0037689 | 25.289  | 4.027  | 0.321 | 0.1631 |
| FBgn0013753 | 20.531  | 4.310  | 0.452 | 0.2653 |
| FBgn0039352 | 797.433 | 13.898 | 0.121 | 0.0032 |
| FBgn0040823 | 795.488 | 19.927 | 0.250 | 0.0346 |
| FBgn0036954 | 27.627  | 3.547  | 0.228 | 0.0613 |
| FBgn0016694 | 657.316 | 12.742 | 0.124 | 0.0097 |
| FBgn0031535 | 7.458   | 1.228  | 0.101 | 0.1362 |
| FBgn0015828 | 33.048  | 4.671  | 0.330 | 0.1115 |
| FBgn0031664 | 728.403 | 21.682 | 0.323 | 0.0746 |
| FBgn0033425 | 825.425 | 13.382 | 0.108 | 0.0027 |
| FBgn0025800 | 156.319 | 4.615  | 0.068 | 0.0131 |
| FBgn0037623 | 706.315 | 18.490 | 0.242 | 0.0450 |
| FBgn0039691 | 773.268 | 14.577 | 0.137 | 0.0148 |
| FBgn0036402 | 20.928  | 1.059  | 0.027 | 0.0202 |
| FBgn0034512 | 42.956  | 5.828  | 0.395 | 0.1558 |
| FBgn0000581 | 674.906 | 34.896 | 0.902 | 0.8479 |
| FBgn0036278 | 5.759   | 2.258  | 0.443 | 0.4950 |
| FBgn0037792 | 783.114 | 14.494 | 0.134 | 0.0096 |
| FBgn0001941 | 48.968  | 1.505  | 0.023 | 0.0106 |
| FBgn0051690 | 32.258  | 6.152  | 0.587 | 0.3861 |
| FBgn0034364 | 699.118 | 18.809 | 0.253 | 0.0825 |
| FBgn0035865 | 776.728 | 17.905 | 0.206 | 0.0250 |
| FBgn0052412 | 16.798  | 2.230  | 0.148 | 0.1096 |
| FBgn0032872 | 23.184  | 2.091  | 0.094 | 0.0592 |
| FBgn0026317 | 59.472  | 3.513  | 0.104 | 0.0129 |
| FBgn0011758 | 750.686 | 27.280 | 0.496 | 0.2392 |
| FBgn0032016 | 35.192  | 4.331  | 0.267 | 0.0958 |
| FBgn0011746 | 674.728 | 19.813 | 0.291 | 0.1180 |
| FBgn0053056 | 841.227 | 10.731 | 0.068 | 0.0016 |
| FBgn0036356 | 141.257 | 4.403  | 0.069 | 0.0026 |
| FBgn0001084 | 815.875 | 12.816 | 0.101 | 0.0055 |
| FBgn0010340 | 9.092   | 1.481  | 0.121 | 0.1339 |
| FBgn0019686 | 17.093  | 2.091  | 0.128 | 0.0873 |
| FBgn0035995 | 116.082 | 6.764  | 0.197 | 0.0222 |
| FBgn0010803 | 24.781  | 3.135  | 0.198 | 0.0990 |
| FBgn0034133 | 709.858 | 18.599 | 0.244 | 0.0321 |
| FBgn0002989 | 728.054 | 28.345 | 0.552 | 0.3111 |
| FBgn0016036 | 650.818 | 27.132 | 0.566 | 0.4093 |
| FBgn0051635 | 69.171  | 7.114  | 0.366 | 0.1409 |
| FBgn0023180 | 16.439  | 3.760  | 0.430 | 0.2721 |
| FBgn0033153 | 25.823  | 3.928  | 0.299 | 0.1021 |
| FBgn0011291 | 647.836 | 10.466 | 0.085 | 0.0098 |
| FBgn0038128 | 34.183  | 2.018  | 0.060 | 0.0128 |
| FBgn0051787 | 17.024  | 2.258  | 0.150 | 0.1063 |
| FBgn0036330 | 25.600  | 3.921  | 0.300 | 0.1300 |
| FBgn0034351 | 108.976 | 4.235  | 0.082 | 0.0124 |
| FBgn0037720 | 147.305 | 8.875  | 0.267 | 0.0502 |
| FBgn0031428 | 7.706   | 2.843  | 0.525 | 0.5171 |
| FBgn0032906 | 64.496  | 5.454  | 0.231 | 0.0430 |
| FBgn0010774 | 18.252  | 1.697  | 0.079 | 0.0483 |
| FBgn0032345 | 27.477  | 3.364  | 0.206 | 0.0887 |
| FBgn0031591 | 29.654  | 5.612  | 0.531 | 0.3340 |
| FBgn0034755 | 663.936 | 20.460 | 0.315 | 0.0706 |

|             |         |        |       |        |
|-------------|---------|--------|-------|--------|
| FBgn0038464 | 738.070 | 21.818 | 0.322 | 0.0744 |
| FBgn0030556 | 764.973 | 17.135 | 0.192 | 0.0322 |
| FBgn0032170 | 9.522   | 0.751  | 0.030 | 0.0630 |
| FBgn0027525 | 5.562   | 2.423  | 0.528 | 0.5510 |
| FBgn0035040 | 29.636  | 5.458  | 0.503 | 0.2857 |
| FBgn0035853 | 20.300  | 2.580  | 0.164 | 0.0817 |
| FBgn0031422 | 19.776  | 3.240  | 0.265 | 0.1132 |
| FBgn0032057 | 791.568 | 20.835 | 0.274 | 0.0453 |
| FBgn0036291 | 7.963   | 2.422  | 0.368 | 0.3581 |
| FBgn0011476 | 15.717  | 2.189  | 0.152 | 0.0904 |
| FBgn0035208 | 21.250  | 0.670  | 0.011 | 0.0123 |
| FBgn0030655 | 844.347 | 21.194 | 0.266 | 0.0420 |
| FBgn0034939 | 16.913  | 2.889  | 0.247 | 0.1426 |
| FBgn0040344 | 735.839 | 17.467 | 0.207 | 0.0191 |
| FBgn0031720 | 639.625 | 17.350 | 0.235 | 0.0517 |
| FBgn0025937 | 129.970 | 6.756  | 0.176 | 0.0600 |
| FBgn0022700 | 59.260  | 5.468  | 0.252 | 0.0862 |
| FBgn0026578 | 787.409 | 13.733 | 0.120 | 0.0058 |
| FBgn0038088 | 23.735  | 3.498  | 0.258 | 0.1013 |
| FBgn0034810 | 11.380  | 2.274  | 0.227 | 0.1751 |
| FBgn0035420 | 126.204 | 5.737  | 0.130 | 0.0086 |
| FBgn0033605 | 817.063 | 13.849 | 0.117 | 0.0037 |
| FBgn0035805 | 94.305  | 5.332  | 0.151 | 0.0322 |
| FBgn0001247 | 849.609 | 8.121  | 0.039 | 0.0009 |
| FBgn0039831 | 18.858  | 4.669  | 0.578 | 0.3957 |
| FBgn0031069 | 15.286  | 2.197  | 0.158 | 0.0970 |
| FBgn0034825 | 22.333  | 2.789  | 0.174 | 0.0739 |
| FBgn0030410 | 762.921 | 20.816 | 0.284 | 0.0500 |
| FBgn0024179 | 836.267 | 14.676 | 0.129 | 0.0059 |
| FBgn0032455 | 42.691  | 4.913  | 0.283 | 0.0686 |
| FBgn0024177 | 784.376 | 11.482 | 0.084 | 0.0213 |
| FBgn0038927 | 15.726  | 1.493  | 0.071 | 0.0716 |
| FBgn0030439 | 124.032 | 4.452  | 0.080 | 0.0056 |
| FBgn0013347 | 725.616 | 22.658 | 0.354 | 0.0970 |
| FBgn0026634 | 19.910  | 2.620  | 0.172 | 0.0890 |
| FBgn0033289 | 34.339  | 3.334  | 0.162 | 0.0467 |
| FBgn0040075 | 705.536 | 8.416  | 0.050 | 0.0043 |
| FBgn0013269 | 93.183  | 3.779  | 0.077 | 0.0051 |
| FBgn0034507 | 55.414  | 3.461  | 0.108 | 0.0194 |
| FBgn0035711 | 680.685 | 26.965 | 0.534 | 0.2769 |
| FBgn0052109 | 6.011   | 1.586  | 0.209 | 0.2618 |
| FBgn0039849 | 62.932  | 5.721  | 0.260 | 0.0445 |
| FBgn0028878 | 43.474  | 5.079  | 0.297 | 0.1082 |
| FBgn0032798 | 12.202  | 1.647  | 0.111 | 0.1311 |
| FBgn0039025 | 118.360 | 4.093  | 0.071 | 0.0110 |
| FBgn0031776 | 777.592 | 22.927 | 0.338 | 0.0854 |
| FBgn0052379 | 8.746   | 1.802  | 0.186 | 0.2182 |
| FBgn0040071 | 19.459  | 4.941  | 0.627 | 0.4805 |
| FBgn0038256 | 7.369   | 1.845  | 0.231 | 0.2648 |
| FBgn0031604 | 24.474  | 1.773  | 0.064 | 0.0327 |
| FBgn0030801 | 17.889  | 3.541  | 0.350 | 0.2114 |
| FBgn0036372 | 874.965 | 12.279 | 0.086 | 0.0011 |
| FBgn0039179 | 841.320 | 16.362 | 0.159 | 0.0082 |
| FBgn0046704 | 615.486 | 12.374 | 0.124 | 0.0146 |



|             |         |        |       |        |
|-------------|---------|--------|-------|--------|
| FBgn0030722 | 191.144 | 10.349 | 0.280 | 0.1172 |
| FBgn0034501 | 814.892 | 11.410 | 0.080 | 0.0062 |
| FBgn0031357 | 789.540 | 15.308 | 0.148 | 0.0067 |
| FBgn0035598 | 39.738  | 2.496  | 0.078 | 0.0171 |
| FBgn0028860 | 21.340  | 4.124  | 0.398 | 0.2398 |
| FBgn0038578 | 8.501   | 1.769  | 0.184 | 0.1900 |
| FBgn0011581 | 627.072 | 15.428 | 0.190 | 0.0709 |
| FBgn0031520 | 18.608  | 3.818  | 0.392 | 0.2374 |
| FBgn0031710 | 30.043  | 3.019  | 0.152 | 0.0606 |
| FBgn0039395 | 9.503   | 4.165  | 0.913 | 0.8995 |
| FBgn0034856 | 154.062 | 3.931  | 0.050 | 0.0048 |
| FBgn0014026 | 800.532 | 16.588 | 0.172 | 0.0139 |
| FBgn0039213 | 110.106 | 6.708  | 0.204 | 0.0200 |
| FBgn0029803 | 77.912  | 3.815  | 0.093 | 0.0073 |
| FBgn0025626 | 742.404 | 16.857 | 0.191 | 0.0150 |
| FBgn0032636 | 4.825   | 2.085  | 0.451 | 0.5046 |
| FBgn0041342 | 21.911  | 2.909  | 0.193 | 0.0927 |
| FBgn0003517 | 63.065  | 5.185  | 0.213 | 0.0378 |
| FBgn0015946 | 20.922  | 3.764  | 0.339 | 0.1567 |
| FBgn0010408 | 29.965  | 3.667  | 0.224 | 0.0779 |
| FBgn0015778 | 799.328 | 15.870 | 0.158 | 0.0089 |
| FBgn0031611 | 628.117 | 16.589 | 0.219 | 0.0227 |
| FBgn0003961 | 9.186   | 5.063  | 1.395 | 0.5805 |
| FBgn0033817 | 16.301  | 3.034  | 0.282 | 0.1705 |
| FBgn0030834 | 48.884  | 3.087  | 0.097 | 0.0273 |
| FBgn0031254 | 7.473   | 1.896  | 0.241 | 0.2763 |
| FBgn0030217 | 32.298  | 5.313  | 0.437 | 0.2193 |
| FBgn0027594 | 5.740   | 1.307  | 0.149 | 0.2244 |
| FBgn0011708 | 21.673  | 3.202  | 0.236 | 0.1380 |
| FBgn0032785 | 19.638  | 2.300  | 0.135 | 0.0864 |
| FBgn0037364 | 69.557  | 4.210  | 0.127 | 0.0142 |
| FBgn0038686 | 133.342 | 3.167  | 0.038 | 0.0038 |
| FBgn0031708 | 30.546  | 2.871  | 0.135 | 0.0513 |
| FBgn0032700 | 101.547 | 5.115  | 0.129 | 0.0075 |
| FBgn0035039 | 18.560  | 2.034  | 0.111 | 0.0669 |
| FBgn0002723 | 29.693  | 5.455  | 0.501 | 0.2703 |
| FBgn0034398 | 561.168 | 20.471 | 0.373 | 0.1129 |
| FBgn0036893 | 98.083  | 8.723  | 0.388 | 0.1662 |
| FBgn0034142 | 11.856  | 1.757  | 0.130 | 0.1317 |
| FBgn0039107 | 103.094 | 3.996  | 0.077 | 0.0040 |
| FBgn0031252 | 80.412  | 4.318  | 0.116 | 0.0149 |
| FBgn0027615 | 138.579 | 2.975  | 0.032 | 0.0014 |
| FBgn0031894 | 6.018   | 3.731  | 1.157 | 0.8476 |
| FBgn0036142 | 28.404  | 3.631  | 0.232 | 0.0937 |
| FBgn0035921 | 57.378  | 4.727  | 0.195 | 0.0287 |
| FBgn0032342 | 28.967  | 4.647  | 0.373 | 0.1426 |
| FBgn0051644 | 35.161  | 6.135  | 0.535 | 0.3282 |
| FBgn0037381 | 9.211   | 2.912  | 0.460 | 0.3975 |
| FBgn0032670 | 17.573  | 1.837  | 0.096 | 0.0777 |
| FBgn0038727 | 5.199   | 1.556  | 0.233 | 0.2934 |
| FBgn0035294 | 16.883  | 4.663  | 0.644 | 0.4894 |
| FBgn0020510 | 22.275  | 1.863  | 0.078 | 0.0496 |
| FBgn0036671 | 767.225 | 13.987 | 0.127 | 0.0141 |
| FBgn0026324 | 15.619  | 2.020  | 0.131 | 0.0849 |

|             |         |        |       |        |
|-------------|---------|--------|-------|--------|
| FBgn0050094 | 12.966  | 3.402  | 0.446 | 0.3310 |
| FBgn0050456 | 38.956  | 6.102  | 0.478 | 0.2367 |
| FBgn0041244 | 12.968  | 2.602  | 0.261 | 0.2268 |
| FBgn0035281 | 107.739 | 12.948 | 0.778 | 0.6529 |
| FBgn0033598 | 692.413 | 16.884 | 0.206 | 0.0318 |
| FBgn0034354 | 36.490  | 3.499  | 0.168 | 0.0352 |
| FBgn0020381 | 18.193  | 0.831  | 0.019 | 0.0197 |
| FBgn0025692 | 29.393  | 4.389  | 0.328 | 0.1405 |
| FBgn0037674 | 36.857  | 3.698  | 0.186 | 0.0457 |
| FBgn0004687 | 7.936   | 1.438  | 0.130 | 0.1668 |
| FBgn0030476 | 626.271 | 29.444 | 0.692 | 0.5153 |
| FBgn0000455 | 33.453  | 2.692  | 0.108 | 0.0351 |
| FBgn0031407 | 778.370 | 21.702 | 0.303 | 0.0618 |
| FBgn0011236 | 28.800  | 6.088  | 0.643 | 0.4603 |
| FBgn0032789 | 91.903  | 11.561 | 0.727 | 0.5735 |
| FBgn0030776 | 16.895  | 3.908  | 0.452 | 0.3125 |
| FBgn0040286 | 761.129 | 8.574  | 0.048 | 0.0012 |
| FBgn0000287 | 23.512  | 3.435  | 0.251 | 0.1215 |
| FBgn0032408 | 17.827  | 2.838  | 0.226 | 0.1453 |
| FBgn0035830 | 8.818   | 1.488  | 0.126 | 0.1501 |
| FBgn0035405 | 697.693 | 17.078 | 0.209 | 0.0231 |
| FBgn0037643 | 37.614  | 3.811  | 0.193 | 0.0326 |
| FBgn0023441 | 672.776 | 14.932 | 0.166 | 0.0094 |
| FBgn0031308 | 12.077  | 3.027  | 0.379 | 0.2872 |
| FBgn0037357 | 896.179 | 8.374  | 0.039 | 0.0002 |
| FBgn0032945 | 741.161 | 13.775 | 0.128 | 0.0394 |
| FBgn0029713 | 781.708 | 14.049 | 0.126 | 0.0236 |
| FBgn0038296 | 24.845  | 2.881  | 0.167 | 0.0554 |
| FBgn0034455 | 733.122 | 11.428 | 0.089 | 0.0026 |
| FBgn0031361 | 21.077  | 4.012  | 0.382 | 0.1946 |
| FBgn0035524 | 14.994  | 2.735  | 0.249 | 0.1835 |
| FBgn0030520 | 768.476 | 16.840 | 0.185 | 0.0167 |
| FBgn0037813 | 705.747 | 23.849 | 0.403 | 0.1882 |
| FBgn0036206 | 720.489 | 26.850 | 0.500 | 0.2453 |
| FBgn0032341 | 114.204 | 4.112  | 0.074 | 0.0114 |
| FBgn0035210 | 27.181  | 2.708  | 0.135 | 0.0499 |
| FBgn0050147 | 755.902 | 21.593 | 0.308 | 0.0690 |
| FBgn0034553 | 90.012  | 5.662  | 0.178 | 0.0357 |
| FBgn0030331 | 732.333 | 14.786 | 0.149 | 0.0244 |
| FBgn0034537 | 46.960  | 3.618  | 0.139 | 0.0300 |
| FBgn0030963 | 102.659 | 6.612  | 0.213 | 0.0427 |
| FBgn0037947 | 73.310  | 4.322  | 0.127 | 0.0166 |
| FBgn0028696 | 701.652 | 25.315 | 0.457 | 0.1884 |
| FBgn0027356 | 37.426  | 4.933  | 0.325 | 0.1383 |
| FBgn0000239 | 753.870 | 22.676 | 0.341 | 0.1129 |
| FBgn0021895 | 798.585 | 12.240 | 0.094 | 0.0083 |
| FBgn0035388 | 737.498 | 16.884 | 0.193 | 0.0499 |
| FBgn0033782 | 762.118 | 19.228 | 0.243 | 0.0317 |
| FBgn0011202 | 47.192  | 2.335  | 0.058 | 0.0127 |
| FBgn0034878 | 73.149  | 5.269  | 0.190 | 0.0220 |
| FBgn0036702 | 12.778  | 2.960  | 0.343 | 0.2725 |
| FBgn0033528 | 79.313  | 5.809  | 0.213 | 0.0246 |
| FBgn0040660 | 6.692   | 2.692  | 0.541 | 0.5490 |
| FBgn0033556 | 16.879  | 3.030  | 0.272 | 0.1794 |

|             |         |        |       |        |
|-------------|---------|--------|-------|--------|
| FBgn0039204 | 19.084  | 2.823  | 0.209 | 0.0952 |
| FBgn0010109 | 22.438  | 4.586  | 0.469 | 0.2646 |
| FBgn0033038 | 11.966  | 2.489  | 0.259 | 0.2169 |
| FBgn0039130 | 60.783  | 3.002  | 0.074 | 0.0095 |
| FBgn0035603 | 9.093   | 2.605  | 0.373 | 0.3264 |
| FBgn0034885 | 17.423  | 2.741  | 0.216 | 0.1407 |
| FBgn0039733 | 21.441  | 5.919  | 0.817 | 0.7356 |
| FBgn0039136 | 82.573  | 5.825  | 0.205 | 0.0671 |
| FBgn0039489 | 734.915 | 21.991 | 0.329 | 0.0787 |
| FBgn0028841 | 794.984 | 25.196 | 0.399 | 0.1360 |
| FBgn0030354 | 27.769  | 4.275  | 0.329 | 0.1146 |
| FBgn0051330 | 590.398 | 32.370 | 0.887 | 0.8259 |
| FBgn0029837 | 49.635  | 4.351  | 0.191 | 0.0312 |
| FBgn0038989 | 9.455   | 2.266  | 0.272 | 0.2791 |
| FBgn0032499 | 153.711 | 5.479  | 0.098 | 0.0065 |
| FBgn0026250 | 20.679  | 2.410  | 0.140 | 0.0719 |
| FBgn0017457 | 30.447  | 2.840  | 0.132 | 0.0549 |
| FBgn0001087 | 94.138  | 3.216  | 0.055 | 0.0059 |
| FBgn0014092 | 122.385 | 8.589  | 0.301 | 0.0665 |
| FBgn0013764 | 19.166  | 4.338  | 0.491 | 0.3015 |
| FBgn0037625 | 737.813 | 15.681 | 0.167 | 0.0114 |
| FBgn0031476 | 520.366 | 18.983 | 0.346 | 0.1124 |
| FBgn0034491 | 27.795  | 4.547  | 0.372 | 0.1661 |
| FBgn0000392 | 16.376  | 2.750  | 0.231 | 0.1493 |
| FBgn0065032 | 13.477  | 1.738  | 0.112 | 0.1143 |
| FBgn0031868 | 725.840 | 15.761 | 0.171 | 0.0122 |
| FBgn0035028 | 4.488   | 1.405  | 0.220 | 0.3086 |
| FBgn0031628 | 9.054   | 2.510  | 0.348 | 0.3288 |
| FBgn0030969 | 25.911  | 3.236  | 0.202 | 0.0679 |
| FBgn0038597 | 100.965 | 6.414  | 0.204 | 0.0407 |
| FBgn0004646 | 790.311 | 15.559 | 0.153 | 0.0121 |
| FBgn0035199 | 37.922  | 3.270  | 0.141 | 0.0346 |
| FBgn0039503 | 26.563  | 1.554  | 0.045 | 0.0231 |
| FBgn0039810 | 40.710  | 3.553  | 0.155 | 0.0301 |
| FBgn0030773 | 115.243 | 5.116  | 0.114 | 0.0091 |
| FBgn0030662 | 88.953  | 4.066  | 0.093 | 0.0296 |
| FBgn0032820 | 39.857  | 4.011  | 0.202 | 0.0652 |
| FBgn0031683 | 113.138 | 5.072  | 0.114 | 0.0150 |
| FBgn0034071 | 85.601  | 4.287  | 0.107 | 0.0100 |
| FBgn0023077 | 107.661 | 7.780  | 0.281 | 0.1182 |
| FBgn0034361 | 105.650 | 2.725  | 0.035 | 0.0037 |
| FBgn0004856 | 712.105 | 14.518 | 0.148 | 0.0142 |
| FBgn0004650 | 38.718  | 3.392  | 0.149 | 0.0488 |
| FBgn0040575 | 78.973  | 5.973  | 0.226 | 0.0288 |
| FBgn0033447 | 722.907 | 15.482 | 0.166 | 0.0094 |
| FBgn0023081 | 15.833  | 4.110  | 0.533 | 0.3735 |
| FBgn0031707 | 722.637 | 15.758 | 0.172 | 0.0446 |
| FBgn0028950 | 665.147 | 20.766 | 0.324 | 0.0875 |
| FBgn0050462 | 29.637  | 5.150  | 0.447 | 0.2371 |
| FBgn0039820 | 796.992 | 15.240 | 0.146 | 0.0061 |
| FBgn0036667 | 536.941 | 9.613  | 0.086 | 0.0302 |
| FBgn0035532 | 14.585  | 2.443  | 0.205 | 0.1539 |
| FBgn0038761 | 26.948  | 6.892  | 0.881 | 0.8272 |
| FBgn0038908 | 661.417 | 16.908 | 0.216 | 0.0859 |

|             |         |        |       |        |
|-------------|---------|--------|-------|--------|
| FBgn0043470 | 34.694  | 3.515  | 0.178 | 0.0665 |
| FBgn0029723 | 13.402  | 2.586  | 0.250 | 0.1511 |
| FBgn0050463 | 20.153  | 2.589  | 0.166 | 0.0973 |
| FBgn0034131 | 15.262  | 2.398  | 0.188 | 0.1093 |
| FBgn0052528 | 22.600  | 2.628  | 0.153 | 0.0564 |
| FBgn0027280 | 781.112 | 18.779 | 0.226 | 0.0250 |
| FBgn0033672 | 36.928  | 4.057  | 0.223 | 0.0761 |
| FBgn0032194 | 10.368  | 3.946  | 0.751 | 0.6921 |
| FBgn0036360 | 33.020  | 4.555  | 0.314 | 0.1192 |
| FBgn0034099 | 803.734 | 16.898 | 0.178 | 0.0118 |
| FBgn0050426 | 59.359  | 4.074  | 0.140 | 0.0154 |
| FBgn0031466 | 35.193  | 3.331  | 0.158 | 0.0390 |
| FBgn0033795 | 436.938 | 10.219 | 0.119 | 0.0269 |
| FBgn0033985 | 38.042  | 2.477  | 0.081 | 0.0348 |
| FBgn0037544 | 151.677 | 8.993  | 0.267 | 0.0609 |
| FBgn0023001 | 20.449  | 4.233  | 0.438 | 0.2679 |
| FBgn0034058 | 124.579 | 6.087  | 0.149 | 0.0103 |
| FBgn0035065 | 26.364  | 1.681  | 0.054 | 0.0346 |
| FBgn0038996 | 7.592   | 2.608  | 0.448 | 0.4375 |
| FBgn0024689 | 53.149  | 3.670  | 0.127 | 0.0238 |
| FBgn0036298 | 27.053  | 3.238  | 0.194 | 0.0497 |
| FBgn0011739 | 718.043 | 23.517 | 0.385 | 0.1795 |
| FBgn0036812 | 31.782  | 8.002  | 1.007 | 0.9900 |
| FBgn0024314 | 727.509 | 12.050 | 0.100 | 0.0168 |
| FBgn0042098 | 17.108  | 4.541  | 0.603 | 0.4395 |
| FBgn0014464 | 6.134   | 1.403  | 0.160 | 0.2301 |
| FBgn0024963 | 596.955 | 23.612 | 0.467 | 0.2059 |
| FBgn0038206 | 21.958  | 3.238  | 0.239 | 0.1221 |
| FBgn0030542 | 20.502  | 5.500  | 0.738 | 0.6193 |
| FBgn0035905 | 16.964  | 2.335  | 0.161 | 0.1170 |
| FBgn0037293 | 673.907 | 15.317 | 0.174 | 0.0122 |
| FBgn0037949 | 38.034  | 5.794  | 0.441 | 0.1972 |
| FBgn0050122 | 821.317 | 5.686  | 0.020 | 0.0001 |
| FBgn0039828 | 26.522  | 3.210  | 0.194 | 0.0877 |
| FBgn0051287 | 258.333 | 9.442  | 0.173 | 0.0304 |
| FBgn0051148 | 19.108  | 2.994  | 0.235 | 0.1149 |
| FBgn0032503 | 727.707 | 18.498 | 0.235 | 0.0416 |
| FBgn0064126 | 14.879  | 2.500  | 0.210 | 0.1435 |
| FBgn0040931 | 20.710  | 2.665  | 0.171 | 0.0733 |
| FBgn0028738 | 11.715  | 4.542  | 0.881 | 0.8458 |
| FBgn0030334 | 772.920 | 13.269 | 0.114 | 0.0224 |
| FBgn0010715 | 30.174  | 2.376  | 0.094 | 0.0381 |
| FBgn0031491 | 22.748  | 2.547  | 0.143 | 0.0598 |
| FBgn0001186 | 2.502   | 1.156  | 0.267 | 0.3974 |
| FBgn0038166 | 18.145  | 3.339  | 0.307 | 0.1709 |
| FBgn0021875 | 11.491  | 1.291  | 0.073 | 0.0986 |
| FBgn0031566 | 129.993 | 7.519  | 0.217 | 0.0451 |
| FBgn0000024 | 858.482 | 13.161 | 0.101 | 0.0064 |
| FBgn0027497 | 495.670 | 21.430 | 0.463 | 0.2024 |
| FBgn0026263 | 170.037 | 13.771 | 0.558 | 0.3196 |
| FBgn0004654 | 782.593 | 14.419 | 0.133 | 0.0045 |
| FBgn0038971 | 28.846  | 4.000  | 0.277 | 0.1260 |
| FBgn0002609 | 757.463 | 25.337 | 0.424 | 0.1594 |
| FBgn0033628 | 8.432   | 2.332  | 0.322 | 0.3116 |

|             |         |        |       |        |
|-------------|---------|--------|-------|--------|
| FBgn0031265 | 11.842  | 2.459  | 0.255 | 0.2464 |
| FBgn0033273 | 16.116  | 3.275  | 0.333 | 0.2347 |
| FBgn0030086 | 30.489  | 2.363  | 0.092 | 0.0194 |
| FBgn0010387 | 777.788 | 13.945 | 0.125 | 0.0053 |
| FBgn0052406 | 713.276 | 20.273 | 0.288 | 0.0578 |
| FBgn0034511 | 696.278 | 19.640 | 0.277 | 0.0475 |
| FBgn0039250 | 39.295  | 3.299  | 0.139 | 0.0391 |
| FBgn0033934 | 14.388  | 3.624  | 0.456 | 0.3650 |
| FBgn0010406 | 26.977  | 3.931  | 0.286 | 0.0977 |
| FBgn0026257 | 38.175  | 3.391  | 0.151 | 0.0473 |
| FBgn0011361 | 705.142 | 16.873 | 0.202 | 0.0391 |
| FBgn0031697 | 37.493  | 4.073  | 0.221 | 0.0483 |
| FBgn0050085 | 780.790 | 16.587 | 0.176 | 0.0226 |
| FBgn0020257 | 573.711 | 18.228 | 0.290 | 0.0786 |
| FBgn0027790 | 14.811  | 3.277  | 0.363 | 0.2327 |
| FBgn0036676 | 8.922   | 1.583  | 0.140 | 0.1533 |
| FBgn0034688 | 64.668  | 6.448  | 0.321 | 0.1101 |
| FBgn0039297 | 690.293 | 19.876 | 0.286 | 0.0612 |
| FBgn0037561 | 39.281  | 2.632  | 0.088 | 0.0147 |
| FBgn0039024 | 857.073 | 13.103 | 0.100 | 0.0028 |
| FBgn0041094 | 559.736 | 14.333 | 0.184 | 0.0332 |
| FBgn0030904 | 87.958  | 9.394  | 0.502 | 0.3300 |
| FBgn0038339 | 29.283  | 3.651  | 0.228 | 0.0831 |
| FBgn0031900 | 65.651  | 8.192  | 0.511 | 0.2692 |
| FBgn0037730 | 711.303 | 22.618 | 0.360 | 0.1003 |
| FBgn0035144 | 47.393  | 5.586  | 0.329 | 0.1306 |
| FBgn0032116 | 5.938   | 2.197  | 0.406 | 0.4451 |
| FBgn0051663 | 850.905 | 13.582 | 0.108 | 0.0041 |
| FBgn0010380 | 67.558  | 3.398  | 0.085 | 0.0231 |
| FBgn0038397 | 37.226  | 6.012  | 0.486 | 0.2797 |
| FBgn0034037 | 20.625  | 4.316  | 0.451 | 0.2658 |
| FBgn0001187 | 26.717  | 4.251  | 0.338 | 0.1619 |
| FBgn0033392 | 72.227  | 5.104  | 0.180 | 0.0214 |
| FBgn0003037 | 9.713   | 3.261  | 0.548 | 0.5152 |
| FBgn0033903 | 50.335  | 3.244  | 0.105 | 0.0254 |
| FBgn0035633 | 730.080 | 16.069 | 0.177 | 0.0116 |
| FBgn0025456 | 731.412 | 17.355 | 0.206 | 0.0190 |
| FBgn0032913 | 708.599 | 25.316 | 0.452 | 0.1896 |
| FBgn0017565 | 53.930  | 5.267  | 0.257 | 0.0521 |
| FBgn0025700 | 10.876  | 1.808  | 0.150 | 0.1631 |
| FBgn0038250 | 12.988  | 1.460  | 0.082 | 0.0778 |
| FBgn0037653 | 778.938 | 14.671 | 0.138 | 0.0075 |
| FBgn0039695 | 20.848  | 2.497  | 0.150 | 0.0692 |
| FBgn0031851 | 47.435  | 4.811  | 0.244 | 0.0571 |
| FBgn0024740 | 17.921  | 2.571  | 0.184 | 0.1213 |
| FBgn0029882 | 719.696 | 16.029 | 0.178 | 0.0120 |
| FBgn0038002 | 32.005  | 3.220  | 0.162 | 0.0345 |
| FBgn0031536 | 43.037  | 3.660  | 0.156 | 0.0430 |
| FBgn0028398 | 18.567  | 3.236  | 0.282 | 0.1370 |
| FBgn0030330 | 775.688 | 17.054 | 0.187 | 0.0140 |
| FBgn0052392 | 18.845  | 1.146  | 0.035 | 0.0349 |
| FBgn0036486 | 18.218  | 1.996  | 0.109 | 0.0892 |
| FBgn0035421 | 53.295  | 2.952  | 0.082 | 0.0093 |
| FBgn0024211 | 8.038   | 1.482  | 0.137 | 0.1754 |

|             |         |        |       |        |
|-------------|---------|--------|-------|--------|
| FBgn0037436 | 49.689  | 5.557  | 0.311 | 0.0782 |
| FBgn0034027 | 35.886  | 3.959  | 0.218 | 0.0778 |
| FBgn0035656 | 666.580 | 16.404 | 0.202 | 0.0355 |
| FBgn0037853 | 109.891 | 7.246  | 0.239 | 0.0312 |
| FBgn0036099 | 65.742  | 7.038  | 0.377 | 0.1335 |
| FBgn0038092 | 14.264  | 1.978  | 0.137 | 0.1066 |
| FBgn0034031 | 43.285  | 4.219  | 0.206 | 0.0390 |
| FBgn0033631 | 10.107  | 1.798  | 0.160 | 0.1880 |
| FBgn0034135 | 32.704  | 3.850  | 0.227 | 0.0729 |
| FBgn0035609 | 766.323 | 9.701  | 0.061 | 0.0059 |
| FBgn0039626 | 14.464  | 2.539  | 0.223 | 0.1688 |
| FBgn0032318 | 15.007  | 2.400  | 0.192 | 0.1546 |
| FBgn0011766 | 95.243  | 8.381  | 0.369 | 0.1182 |
| FBgn0033095 | 708.079 | 16.220 | 0.186 | 0.0740 |
| FBgn0034566 | 658.198 | 17.922 | 0.244 | 0.0421 |
| FBgn0010516 | 16.091  | 1.717  | 0.092 | 0.0698 |
| FBgn0031440 | 625.825 | 29.550 | 0.698 | 0.5242 |
| FBgn0033481 | 30.539  | 1.637  | 0.044 | 0.0140 |
| FBgn0030208 | 852.458 | 11.081 | 0.072 | 0.0017 |
| FBgn0029955 | 12.973  | 3.833  | 0.566 | 0.4363 |
| FBgn0031437 | 797.163 | 14.212 | 0.127 | 0.0091 |
| FBgn0032916 | 11.810  | 1.865  | 0.147 | 0.1344 |
| FBgn0032588 | 40.469  | 6.022  | 0.448 | 0.2235 |
| FBgn0030622 | 32.249  | 3.462  | 0.186 | 0.0595 |
| FBgn0053094 | 848.729 | 14.105 | 0.117 | 0.0053 |
| FBgn0031182 | 14.778  | 3.439  | 0.400 | 0.2492 |
| FBgn0036510 | 40.975  | 4.449  | 0.242 | 0.0548 |
| FBgn0050156 | 9.634   | 2.827  | 0.415 | 0.4003 |
| FBgn0053696 | 170.284 | 6.124  | 0.110 | 0.0050 |
| FBgn0038839 | 769.729 | 15.228 | 0.151 | 0.0102 |
| FBgn0028484 | 11.070  | 2.960  | 0.396 | 0.3163 |
| FBgn0014018 | 142.002 | 6.920  | 0.169 | 0.0670 |
| FBgn0029692 | 794.820 | 20.773 | 0.271 | 0.0447 |
| FBgn0033681 | 784.819 | 13.941 | 0.124 | 0.0035 |
| FBgn0028563 | 234.509 | 9.446  | 0.190 | 0.0272 |
| FBgn0003744 | 23.212  | 2.138  | 0.098 | 0.0411 |
| FBgn0038986 | 40.316  | 2.665  | 0.088 | 0.0347 |
| FBgn0032311 | 48.535  | 3.792  | 0.148 | 0.0245 |
| FBgn0026878 | 27.731  | 3.408  | 0.209 | 0.0626 |
| FBgn0039285 | 25.916  | 3.266  | 0.206 | 0.0797 |
| FBgn0025815 | 17.876  | 1.842  | 0.095 | 0.0606 |
| FBgn0037325 | 94.784  | 8.535  | 0.384 | 0.1241 |
| FBgn0036155 | 689.892 | 19.811 | 0.284 | 0.0543 |
| FBgn0038191 | 19.074  | 1.992  | 0.104 | 0.0709 |
| FBgn0034308 | 30.300  | 3.094  | 0.158 | 0.0380 |
| FBgn0023169 | 11.356  | 2.076  | 0.190 | 0.1644 |
| FBgn0003980 | 18.805  | 3.257  | 0.282 | 0.1259 |
| FBgn0029512 | 111.658 | 9.378  | 0.394 | 0.1340 |
| FBgn0002789 | 7.426   | 1.476  | 0.147 | 0.1979 |
| FBgn0041337 | 11.476  | 3.347  | 0.488 | 0.3776 |
| FBgn0036188 | 593.358 | 16.809 | 0.238 | 0.0532 |
| FBgn0030529 | 760.973 | 9.077  | 0.054 | 0.0063 |
| FBgn0038271 | 619.675 | 19.126 | 0.295 | 0.0575 |
| FBgn0038129 | 763.796 | 13.336 | 0.116 | 0.0059 |

|             |         |        |       |        |
|-------------|---------|--------|-------|--------|
| FBgn0003742 | 67.692  | 2.601  | 0.050 | 0.0071 |
| FBgn0028497 | 31.416  | 4.107  | 0.268 | 0.0742 |
| FBgn0002945 | 91.748  | 5.203  | 0.148 | 0.0116 |
| FBgn0001296 | 907.675 | 15.165 | 0.127 | 0.0039 |
| FBgn0035694 | 13.188  | 4.033  | 0.617 | 0.4940 |
| FBgn0014859 | 40.099  | 2.806  | 0.098 | 0.0243 |
| FBgn0011638 | 74.824  | 3.345  | 0.075 | 0.0252 |
| FBgn0031048 | 29.148  | 3.973  | 0.271 | 0.0778 |
| FBgn0027496 | 720.897 | 7.851  | 0.043 | 0.0127 |
| FBgn0030012 | 20.052  | 2.210  | 0.122 | 0.0752 |
| FBgn0013799 | 36.700  | 3.811  | 0.198 | 0.0520 |
| FBgn0046879 | 175.397 | 7.055  | 0.142 | 0.0180 |
| FBgn0029941 | 601.994 | 21.856 | 0.397 | 0.1337 |
| FBgn0037492 | 686.044 | 15.656 | 0.179 | 0.0221 |
| FBgn0030411 | 20.153  | 1.570  | 0.061 | 0.0487 |
| FBgn0030394 | 11.991  | 2.075  | 0.179 | 0.1897 |
| FBgn0030558 | 24.547  | 4.032  | 0.331 | 0.1533 |
| FBgn0039058 | 21.398  | 2.406  | 0.135 | 0.0766 |
| FBgn0033446 | 117.016 | 11.300 | 0.546 | 0.3272 |
| FBgn0051871 | 823.673 | 25.687 | 0.401 | 0.1371 |
| FBgn0001981 | 10.380  | 2.608  | 0.328 | 0.3191 |
| FBgn0039737 | 146.958 | 4.201  | 0.060 | 0.0022 |
| FBgn0000477 | 767.403 | 26.443 | 0.456 | 0.1931 |
| FBgn0050503 | 19.367  | 3.207  | 0.265 | 0.1502 |
| FBgn0023094 | 20.537  | 4.333  | 0.457 | 0.2637 |
| FBgn0051176 | 16.329  | 1.872  | 0.107 | 0.0795 |
| FBgn0022029 | 905.148 | 9.923  | 0.054 | 0.0042 |
| FBgn0031171 | 866.140 | 7.879  | 0.036 | 0.0024 |
| FBgn0001223 | 695.189 | 17.469 | 0.219 | 0.0232 |
| FBgn0030108 | 30.144  | 3.710  | 0.228 | 0.1016 |
| FBgn0003330 | 16.871  | 2.776  | 0.228 | 0.1450 |
| FBgn0001319 | 33.100  | 3.925  | 0.233 | 0.0644 |
| FBgn0030484 | 48.850  | 5.361  | 0.294 | 0.0741 |
| FBgn0052270 | 21.553  | 2.644  | 0.162 | 0.0842 |
| FBgn0001612 | 13.802  | 2.806  | 0.285 | 0.2381 |
| FBgn0038055 | 24.232  | 2.956  | 0.180 | 0.0966 |
| FBgn0031284 | 14.843  | 2.466  | 0.205 | 0.1547 |
| FBgn0039407 | 123.311 | 8.084  | 0.265 | 0.0444 |
| FBgn0027567 | 7.251   | 2.069  | 0.295 | 0.3142 |
| FBgn0053145 | 148.101 | 4.675  | 0.074 | 0.0056 |
| FBgn0031314 | 15.647  | 2.683  | 0.230 | 0.1593 |
| FBgn0042119 | 575.885 | 14.862 | 0.192 | 0.0204 |
| FBgn0038901 | 661.853 | 13.129 | 0.130 | 0.0127 |
| FBgn0035033 | 734.636 | 33.620 | 0.769 | 0.6372 |
| FBgn0032250 | 10.642  | 1.722  | 0.139 | 0.1592 |
| FBgn0019637 | 46.033  | 6.186  | 0.416 | 0.2169 |
| FBgn0032407 | 756.113 | 20.255 | 0.271 | 0.0430 |
| FBgn0037661 | 20.234  | 3.356  | 0.278 | 0.1516 |
| FBgn0015393 | 24.428  | 2.089  | 0.089 | 0.0310 |
| FBgn0050340 | 575.423 | 11.677 | 0.118 | 0.0074 |
| FBgn0033591 | 8.137   | 2.806  | 0.484 | 0.4506 |
| FBgn0038948 | 12.208  | 3.580  | 0.525 | 0.4045 |
| FBgn0002930 | 7.073   | 2.882  | 0.587 | 0.5782 |
| FBgn0051431 | 28.765  | 3.594  | 0.225 | 0.0817 |

|             |         |        |       |        |
|-------------|---------|--------|-------|--------|
| FBgn0035800 | 21.875  | 5.545  | 0.703 | 0.5590 |
| FBgn0032530 | 242.311 | 9.922  | 0.203 | 0.0243 |
| FBgn0039222 | 12.946  | 3.460  | 0.462 | 0.3608 |
| FBgn0002937 | 39.794  | 4.311  | 0.234 | 0.0738 |
| FBgn0031499 | 678.144 | 15.294 | 0.172 | 0.0312 |
| FBgn0027084 | 787.692 | 19.473 | 0.241 | 0.0560 |
| FBgn0034634 | 15.619  | 3.895  | 0.486 | 0.3364 |
| FBgn0019928 | 27.520  | 4.278  | 0.333 | 0.1138 |
| FBgn0037671 | 706.964 | 8.108  | 0.046 | 0.0064 |
| FBgn0040398 | 808.797 | 18.249 | 0.206 | 0.0190 |
| FBgn0051928 | 5.922   | 3.472  | 1.018 | 0.9822 |
| FBgn0034540 | 10.860  | 2.380  | 0.261 | 0.2164 |
| FBgn0040961 | 11.765  | 2.720  | 0.314 | 0.2936 |
| FBgn0032414 | 52.908  | 8.846  | 0.739 | 0.5985 |
| FBgn0026316 | 20.161  | 2.661  | 0.176 | 0.0838 |
| FBgn0037933 | 687.309 | 15.706 | 0.179 | 0.0176 |
| FBgn0030091 | 14.982  | 2.624  | 0.230 | 0.1821 |
| FBgn0030654 | 29.966  | 2.864  | 0.137 | 0.0453 |
| FBgn0031313 | 726.797 | 21.201 | 0.309 | 0.0659 |
| FBgn0036851 | 516.841 | 15.787 | 0.241 | 0.0572 |
| FBgn0029951 | 31.987  | 6.466  | 0.654 | 0.4775 |
| FBgn0038541 | 5.669   | 3.830  | 1.294 | 0.7291 |
| FBgn0028707 | 124.411 | 6.055  | 0.147 | 0.0178 |
| FBgn0038073 | 732.597 | 18.784 | 0.241 | 0.0309 |
| FBgn0000181 | 805.151 | 22.025 | 0.301 | 0.0733 |
| FBgn0032595 | 73.054  | 6.490  | 0.288 | 0.0682 |
| FBgn0051133 | 19.094  | 4.469  | 0.523 | 0.3520 |
| FBgn0039528 | 56.128  | 1.693  | 0.026 | 0.0043 |
| FBgn0043456 | 77.484  | 3.972  | 0.102 | 0.0243 |
| FBgn0033229 | 17.349  | 2.169  | 0.136 | 0.1030 |
| FBgn0024361 | 834.604 | 12.023 | 0.087 | 0.0040 |
| FBgn0010105 | 137.016 | 6.622  | 0.160 | 0.0095 |
| FBgn0039147 | 12.074  | 2.358  | 0.230 | 0.1887 |
| FBgn0030196 | 27.306  | 2.912  | 0.155 | 0.0693 |
| FBgn0051950 | 17.893  | 3.546  | 0.351 | 0.1834 |
| FBgn0031498 | 31.907  | 2.479  | 0.096 | 0.0431 |
| FBgn0030740 | 13.570  | 3.542  | 0.462 | 0.3545 |
| FBgn0035952 | 46.509  | 4.461  | 0.214 | 0.0517 |
| FBgn0036314 | 124.928 | 5.017  | 0.101 | 0.0159 |
| FBgn0030339 | 683.985 | 19.295 | 0.272 | 0.0523 |
| FBgn0039530 | 742.410 | 17.354 | 0.203 | 0.0210 |
| FBgn0030789 | 32.149  | 2.514  | 0.098 | 0.0481 |
| FBgn0030813 | 31.213  | 3.475  | 0.193 | 0.0775 |
| FBgn0025582 | 34.942  | 3.620  | 0.187 | 0.0464 |
| FBgn0027532 | 786.549 | 13.990 | 0.124 | 0.0225 |
| FBgn0034345 | 691.179 | 17.657 | 0.226 | 0.0253 |
| FBgn0039902 | 24.097  | 3.254  | 0.220 | 0.0862 |
| FBgn0028573 | 22.493  | 3.509  | 0.274 | 0.1374 |
| FBgn0010052 | 78.045  | 2.675  | 0.046 | 0.0069 |
| FBgn0011715 | 802.703 | 13.473 | 0.113 | 0.0031 |
| FBgn0033540 | 21.162  | 3.232  | 0.247 | 0.0968 |
| FBgn0027054 | 166.242 | 4.231  | 0.054 | 0.0064 |
| FBgn0016119 | 90.614  | 6.216  | 0.213 | 0.0276 |
| FBgn0053308 | 17.575  | 3.334  | 0.316 | 0.1599 |



|             |         |        |       |        |
|-------------|---------|--------|-------|--------|
| FBgn0037899 | 12.152  | 1.412  | 0.082 | 0.0730 |
| FBgn0030493 | 14.800  | 3.865  | 0.505 | 0.3552 |
| FBgn0030812 | 828.338 | 13.061 | 0.103 | 0.0030 |
| FBgn0033307 | 16.556  | 7.301  | 1.610 | 0.3627 |
| FBgn0033360 | 20.072  | 3.917  | 0.382 | 0.2349 |
| FBgn0031814 | 794.169 | 11.720 | 0.086 | 0.0078 |
| FBgn0035285 | 26.617  | 3.102  | 0.181 | 0.0760 |
| FBgn0030947 | 12.686  | 2.805  | 0.310 | 0.2212 |
| FBgn0038476 | 8.969   | 2.388  | 0.318 | 0.3289 |
| FBgn0010397 | 18.227  | 1.298  | 0.046 | 0.0412 |
| FBgn0031573 | 22.160  | 3.047  | 0.209 | 0.0923 |
| FBgn0038520 | 688.531 | 16.370 | 0.195 | 0.0175 |
| FBgn0036182 | 11.551  | 3.335  | 0.482 | 0.3924 |
| FBgn0034293 | 24.677  | 3.165  | 0.203 | 0.0918 |
| FBgn0039522 | 15.752  | 1.870  | 0.111 | 0.0867 |
| FBgn0038530 | 128.891 | 6.345  | 0.156 | 0.0142 |
| FBgn0001308 | 93.196  | 6.055  | 0.197 | 0.0382 |
| FBgn0033249 | 13.790  | 4.078  | 0.603 | 0.4672 |
| FBgn0023520 | 803.910 | 17.676 | 0.194 | 0.0174 |
| FBgn0032910 | 773.108 | 20.231 | 0.265 | 0.0414 |
| FBgn0029789 | 42.882  | 2.951  | 0.102 | 0.0144 |
| FBgn0033972 | 15.497  | 2.583  | 0.215 | 0.1334 |
| FBgn0038244 | 873.803 | 18.888 | 0.204 | 0.0184 |
| FBgn0032262 | 6.022   | 1.698  | 0.239 | 0.2973 |
| FBgn0034488 | 861.355 | 7.569  | 0.033 | 0.0007 |
| FBgn0032986 | 91.510  | 6.090  | 0.203 | 0.0243 |
| FBgn0010575 | 26.344  | 3.564  | 0.241 | 0.0749 |
| FBgn0032651 | 34.504  | 2.212  | 0.071 | 0.0151 |
| FBgn0027593 | 43.608  | 5.486  | 0.345 | 0.1082 |
| FBgn0040807 | 679.695 | 19.051 | 0.267 | 0.0609 |
| FBgn0034118 | 761.505 | 14.679 | 0.141 | 0.0068 |
| FBgn0027608 | 736.802 | 12.099 | 0.099 | 0.0036 |
| FBgn0037291 | 20.985  | 5.020  | 0.600 | 0.4368 |
| FBgn0031317 | 18.240  | 1.289  | 0.046 | 0.0297 |
| FBgn0033467 | 12.764  | 3.498  | 0.479 | 0.3842 |
| FBgn0031968 | 23.719  | 1.103  | 0.026 | 0.0204 |
| FBgn0037883 | 7.725   | 1.326  | 0.114 | 0.1605 |
| FBgn0029808 | 51.153  | 5.586  | 0.305 | 0.0803 |
| FBgn0050376 | 712.688 | 18.013 | 0.228 | 0.0333 |
| FBgn0040351 | 13.679  | 1.626  | 0.097 | 0.1052 |
| FBgn0030774 | 826.186 | 11.985 | 0.087 | 0.0031 |
| FBgn0031589 | 9.476   | 1.586  | 0.133 | 0.1519 |
| FBgn0036814 | 23.764  | 5.184  | 0.565 | 0.3825 |
| FBgn0037229 | 30.511  | 5.001  | 0.410 | 0.1914 |
| FBgn0038252 | 16.308  | 2.894  | 0.257 | 0.1827 |
| FBgn0010607 | 16.983  | 2.784  | 0.228 | 0.1344 |
| FBgn0052700 | 53.479  | 5.571  | 0.290 | 0.0965 |
| FBgn0035669 | 12.154  | 1.866  | 0.143 | 0.1335 |
| FBgn0052191 | 824.410 | 9.900  | 0.059 | 0.0018 |
| FBgn0031897 | 45.166  | 2.265  | 0.057 | 0.0165 |
| FBgn0021765 | 791.335 | 13.298 | 0.112 | 0.0105 |
| FBgn0033806 | 803.284 | 7.367  | 0.034 | 0.0007 |
| FBgn0000529 | 760.979 | 15.998 | 0.168 | 0.0224 |
| FBgn0015321 | 12.580  | 2.939  | 0.343 | 0.2375 |

|             |         |        |       |        |
|-------------|---------|--------|-------|--------|
| FBgn0041238 | 21.578  | 4.018  | 0.374 | 0.1720 |
| FBgn0022986 | 458.455 | 8.155  | 0.073 | 0.0030 |
| FBgn0004118 | 34.833  | 3.022  | 0.131 | 0.0308 |
| FBgn0035823 | 50.322  | 4.940  | 0.242 | 0.0622 |
| FBgn0031186 | 27.518  | 1.770  | 0.057 | 0.0198 |
| FBgn0038324 | 40.611  | 4.638  | 0.265 | 0.0648 |
| FBgn0040385 | 20.007  | 2.901  | 0.210 | 0.0886 |
| FBgn0039713 | 20.109  | 3.599  | 0.322 | 0.1687 |
| FBgn0036018 | 48.432  | 3.884  | 0.156 | 0.0199 |
| FBgn0001980 | 831.635 | 16.303 | 0.160 | 0.0084 |
| FBgn0035914 | 15.683  | 3.562  | 0.404 | 0.2404 |
| FBgn0040636 | 19.182  | 4.302  | 0.482 | 0.3018 |
| FBgn0035879 | 825.451 | 18.012 | 0.197 | 0.0163 |
| FBgn0032348 | 13.613  | 2.332  | 0.200 | 0.1464 |
| FBgn0035073 | 49.643  | 3.843  | 0.149 | 0.0404 |
| FBgn0029785 | 25.179  | 4.050  | 0.326 | 0.1506 |
| FBgn0036763 | 26.150  | 3.101  | 0.184 | 0.0873 |
| FBgn0034804 | 10.895  | 1.298  | 0.077 | 0.0874 |
| FBgn0033547 | 104.215 | 4.219  | 0.085 | 0.0030 |
| FBgn0034122 | 25.959  | 7.172  | 0.991 | 0.9869 |
| FBgn0031490 | 46.019  | 3.562  | 0.138 | 0.0275 |
| FBgn0030777 | 643.569 | 20.457 | 0.325 | 0.0760 |
| FBgn0031064 | 627.191 | 34.832 | 0.967 | 0.9494 |
| FBgn0033393 | 63.398  | 3.006  | 0.071 | 0.0066 |
| FBgn0031364 | 40.651  | 6.327  | 0.492 | 0.2611 |
| FBgn0031881 | 27.240  | 3.681  | 0.249 | 0.0918 |
| FBgn0035725 | 74.511  | 5.346  | 0.192 | 0.0447 |
| FBgn0053975 | 7.372   | 1.663  | 0.188 | 0.2298 |
| FBgn0027507 | 5.580   | 2.307  | 0.477 | 0.5180 |
| FBgn0029823 | 18.994  | 2.144  | 0.121 | 0.0791 |
| FBgn0051373 | 10.500  | 4.908  | 1.147 | 0.8236 |
| FBgn0035036 | 24.096  | 3.787  | 0.298 | 0.1501 |
| FBgn0001098 | 738.937 | 14.785 | 0.148 | 0.0065 |
| FBgn0030025 | 480.675 | 18.809 | 0.368 | 0.1352 |
| FBgn0000449 | 745.328 | 20.153 | 0.272 | 0.0452 |
| FBgn0037605 | 62.179  | 3.464  | 0.096 | 0.0170 |
| FBgn0015338 | 9.426   | 2.953  | 0.463 | 0.4174 |
| FBgn0003510 | 35.894  | 5.992  | 0.500 | 0.2617 |
| FBgn0039123 | 8.415   | 1.757  | 0.184 | 0.2066 |
| FBgn0031002 | 16.341  | 2.829  | 0.245 | 0.1626 |
| FBgn0034173 | 60.294  | 5.686  | 0.268 | 0.0828 |
| FBgn0037299 | 9.927   | 2.273  | 0.260 | 0.2558 |
| FBgn0037747 | 55.168  | 4.856  | 0.214 | 0.0540 |
| FBgn0032885 | 155.376 | 8.762  | 0.247 | 0.0338 |
| FBgn0032801 | 27.844  | 4.083  | 0.299 | 0.1199 |
| FBgn0038569 | 32.244  | 5.584  | 0.484 | 0.2624 |
| FBgn0030093 | 762.490 | 19.755 | 0.256 | 0.0374 |
| FBgn0023507 | 784.743 | 14.875 | 0.141 | 0.0066 |
| FBgn0046296 | 16.674  | 3.249  | 0.316 | 0.1938 |
| FBgn0031652 | 13.867  | 3.719  | 0.499 | 0.3454 |
| FBgn0035518 | 570.545 | 27.891 | 0.682 | 0.5100 |
| FBgn0031109 | 786.541 | 18.791 | 0.224 | 0.0249 |
| FBgn0025839 | 24.388  | 3.484  | 0.249 | 0.1142 |
| FBgn0010531 | 10.728  | 0.395  | 0.007 | 0.0216 |

|             |         |        |       |        |
|-------------|---------|--------|-------|--------|
| FBgn0030500 | 56.339  | 3.579  | 0.114 | 0.0189 |
| FBgn0025878 | 635.599 | 15.156 | 0.181 | 0.0449 |
| FBgn0020415 | 632.579 | 17.569 | 0.244 | 0.0816 |
| FBgn0034355 | 13.495  | 2.715  | 0.273 | 0.2252 |
| FBgn0030474 | 104.822 | 6.446  | 0.198 | 0.0300 |
| FBgn0033383 | 73.938  | 6.070  | 0.249 | 0.0388 |
| FBgn0038941 | 70.411  | 6.594  | 0.309 | 0.0724 |
| FBgn0025716 | 972.040 | 6.716  | 0.023 | 0.0003 |
| FBgn0001986 | 692.823 | 15.252 | 0.168 | 0.0338 |
| FBgn0013726 | 771.464 | 13.379 | 0.116 | 0.0086 |
| FBgn0039799 | 152.418 | 8.437  | 0.233 | 0.0470 |
| FBgn0051446 | 16.605  | 2.997  | 0.270 | 0.1400 |
| FBgn0013767 | 697.165 | 14.822 | 0.158 | 0.0168 |
| FBgn0029754 | 848.843 | 16.025 | 0.151 | 0.0070 |
| FBgn0051935 | 87.474  | 2.863  | 0.047 | 0.0029 |
| FBgn0031792 | 831.776 | 10.006 | 0.060 | 0.0056 |
| FBgn0031148 | 712.137 | 18.201 | 0.233 | 0.0360 |
| FBgn0038325 | 16.006  | 5.100  | 0.813 | 0.7434 |
| FBgn0031632 | 7.714   | 0.745  | 0.036 | 0.0795 |
| FBgn0002673 | 184.655 | 10.117 | 0.277 | 0.0476 |
| FBgn0033028 | 22.161  | 2.463  | 0.137 | 0.0763 |
| FBgn0050053 | 10.519  | 4.237  | 0.853 | 0.8124 |
| FBgn0039555 | 89.166  | 4.745  | 0.126 | 0.0102 |
| FBgn0039350 | 15.890  | 3.060  | 0.295 | 0.1808 |
| FBgn0051158 | 18.336  | 3.510  | 0.336 | 0.2110 |
| FBgn0039055 | 131.455 | 2.813  | 0.030 | 0.0113 |
| FBgn0037992 | 21.504  | 5.179  | 0.624 | 0.4440 |
| FBgn0000092 | 23.727  | 5.677  | 0.679 | 0.5320 |
| FBgn0030676 | 779.704 | 18.904 | 0.229 | 0.0265 |
| FBgn0051266 | 18.381  | 2.848  | 0.221 | 0.1373 |
| FBgn0028382 | 140.202 | 4.913  | 0.086 | 0.0086 |
| FBgn0003013 | 728.115 | 14.542 | 0.145 | 0.0637 |
| FBgn0036369 | 35.422  | 3.258  | 0.150 | 0.0472 |
| FBgn0023167 | 23.923  | 2.984  | 0.186 | 0.0653 |
| FBgn0024249 | 746.535 | 13.020 | 0.114 | 0.0027 |
| FBgn0051068 | 677.050 | 32.875 | 0.798 | 0.6609 |
| FBgn0032475 | 49.409  | 3.265  | 0.108 | 0.0167 |
| FBgn0004511 | 569.505 | 20.732 | 0.377 | 0.1415 |
| FBgn0026418 | 48.383  | 3.940  | 0.160 | 0.0295 |
| FBgn0038674 | 29.053  | 3.116  | 0.167 | 0.0562 |
| FBgn0039740 | 817.226 | 17.037 | 0.178 | 0.0139 |
| FBgn0041713 | 41.805  | 3.247  | 0.126 | 0.0386 |
| FBgn0032488 | 95.126  | 3.419  | 0.061 | 0.0036 |
| FBgn0036157 | 17.250  | 4.652  | 0.627 | 0.4603 |
| FBgn0032305 | 777.193 | 22.117 | 0.315 | 0.0693 |
| FBgn0037962 | 12.923  | 2.633  | 0.268 | 0.2287 |
| FBgn0002567 | 884.306 | 9.065  | 0.046 | 0.0004 |
| FBgn0004957 | 738.086 | 21.352 | 0.309 | 0.0669 |
| FBgn0031880 | 14.888  | 2.770  | 0.258 | 0.1751 |
| FBgn0037328 | 37.979  | 4.569  | 0.275 | 0.0763 |
| FBgn0033656 | 117.180 | 3.930  | 0.066 | 0.0024 |
| FBgn0001995 | 152.217 | 5.583  | 0.102 | 0.0101 |
| FBgn0067102 | 32.876  | 2.966  | 0.134 | 0.0597 |
| FBgn0031651 | 792.599 | 17.430 | 0.192 | 0.0151 |

|             |         |        |       |        |
|-------------|---------|--------|-------|--------|
| FBgn0036301 | 108.462 | 3.832  | 0.068 | 0.0055 |
| FBgn0038355 | 25.820  | 1.928  | 0.072 | 0.0302 |
| FBgn0035602 | 832.033 | 8.239  | 0.041 | 0.0020 |
| FBgn0038313 | 852.519 | 19.344 | 0.219 | 0.0232 |
| FBgn0039673 | 534.379 | 20.067 | 0.377 | 0.1302 |
| FBgn0035286 | 29.317  | 4.827  | 0.397 | 0.1864 |
| FBgn0037536 | 250.534 | 8.116  | 0.131 | 0.0059 |
| FBgn0026390 | 595.434 | 19.323 | 0.314 | 0.0907 |
| FBgn0052423 | 19.446  | 2.324  | 0.139 | 0.0980 |
| FBgn0038914 | 16.381  | 4.896  | 0.732 | 0.6284 |
| FBgn0033089 | 11.148  | 2.142  | 0.206 | 0.2037 |
| FBgn0037627 | 8.723   | 1.125  | 0.073 | 0.1168 |
| FBgn0030434 | 17.850  | 2.679  | 0.201 | 0.1430 |
| FBgn0030843 | 8.765   | 4.147  | 0.981 | 0.9777 |
| FBgn0033848 | 18.368  | 2.351  | 0.150 | 0.0840 |
| FBgn0033624 | 30.823  | 3.891  | 0.246 | 0.0627 |
| FBgn0033349 | 13.558  | 2.035  | 0.153 | 0.1331 |
| FBgn0016715 | 794.016 | 17.801 | 0.200 | 0.0239 |
| FBgn0027868 | 19.688  | 3.774  | 0.362 | 0.2288 |
| FBgn0026380 | 673.491 | 14.137 | 0.148 | 0.0400 |
| FBgn0039692 | 24.214  | 2.110  | 0.092 | 0.0339 |
| FBgn0034242 | 16.772  | 4.179  | 0.521 | 0.3649 |
| FBgn0031713 | 21.784  | 2.736  | 0.172 | 0.0781 |
| FBgn0030522 | 36.294  | 1.550  | 0.033 | 0.0132 |
| FBgn0029911 | 12.575  | 4.462  | 0.792 | 0.7345 |
| FBgn0034994 | 106.243 | 7.487  | 0.264 | 0.0566 |
| FBgn0033268 | 171.727 | 8.235  | 0.197 | 0.0168 |
| FBgn0051812 | 77.565  | 5.580  | 0.201 | 0.0617 |
| FBgn0032295 | 686.574 | 18.581 | 0.251 | 0.0368 |
| FBgn0030658 | 15.032  | 1.913  | 0.122 | 0.1048 |
| FBgn0031906 | 35.936  | 4.371  | 0.266 | 0.0995 |
| FBgn0036078 | 17.302  | 5.730  | 0.949 | 0.9293 |
| FBgn0046687 | 27.964  | 4.377  | 0.343 | 0.1726 |
| FBgn0031424 | 21.498  | 3.277  | 0.250 | 0.1145 |
| FBgn0032124 | 13.632  | 3.746  | 0.515 | 0.3709 |
| FBgn0027620 | 10.646  | 1.214  | 0.069 | 0.0807 |
| FBgn0030291 | 471.238 | 14.027 | 0.209 | 0.0319 |
| FBgn0034365 | 67.178  | 2.093  | 0.033 | 0.0042 |
| FBgn0035844 | 42.349  | 4.391  | 0.228 | 0.0404 |
| FBgn0036028 | 15.514  | 3.159  | 0.322 | 0.2149 |
| FBgn0034127 | 34.692  | 4.270  | 0.263 | 0.0715 |
| FBgn0000524 | 19.604  | 2.497  | 0.159 | 0.0954 |
| FBgn0035298 | 19.027  | 2.731  | 0.196 | 0.1290 |
| FBgn0027784 | 44.884  | 3.185  | 0.113 | 0.0349 |
| FBgn0029812 | 37.191  | 7.714  | 0.800 | 0.7073 |
| FBgn0030659 | 55.637  | 3.967  | 0.141 | 0.0201 |
| FBgn0031356 | 30.075  | 3.872  | 0.249 | 0.0693 |
| FBgn0002778 | 830.330 | 16.846 | 0.171 | 0.0217 |
| FBgn0037760 | 32.299  | 3.525  | 0.192 | 0.0810 |
| FBgn0035978 | 45.841  | 3.548  | 0.137 | 0.0258 |
| FBgn0029736 | 706.402 | 17.627 | 0.220 | 0.0411 |
| FBgn0036010 | 7.342   | 2.231  | 0.339 | 0.3307 |
| FBgn0031304 | 50.738  | 3.745  | 0.138 | 0.0221 |
| FBgn0037225 | 16.362  | 3.937  | 0.474 | 0.2965 |

|             |         |        |       |        |
|-------------|---------|--------|-------|--------|
| FBgn0029532 | 18.637  | 4.703  | 0.593 | 0.4208 |
| FBgn0036437 | 41.781  | 5.102  | 0.312 | 0.1100 |
| FBgn0015623 | 13.972  | 2.546  | 0.232 | 0.1688 |
| FBgn0035878 | 913.831 | 6.080  | 0.020 | 0.0014 |
| FBgn0032012 | 19.303  | 2.322  | 0.140 | 0.0736 |
| FBgn0024734 | 763.686 | 13.110 | 0.113 | 0.0099 |
| FBgn0039259 | 84.229  | 5.240  | 0.163 | 0.0331 |
| FBgn0024889 | 730.816 | 16.805 | 0.193 | 0.0152 |
| FBgn0050410 | 4.157   | 1.745  | 0.366 | 0.4505 |
| FBgn0028471 | 39.396  | 4.331  | 0.238 | 0.0718 |
| FBgn0032763 | 21.147  | 2.803  | 0.186 | 0.1002 |
| FBgn0003042 | 817.048 | 22.016 | 0.297 | 0.0621 |
| FBgn0013720 | 712.236 | 20.949 | 0.308 | 0.0651 |
| FBgn0036778 | 19.054  | 3.505  | 0.322 | 0.1611 |
| FBgn0027363 | 761.737 | 18.591 | 0.227 | 0.0314 |
| FBgn0025632 | 29.119  | 3.101  | 0.165 | 0.0763 |
| FBgn0036053 | 14.269  | 2.126  | 0.158 | 0.1073 |
| FBgn0033645 | 106.266 | 10.129 | 0.483 | 0.2252 |
| FBgn0020312 | 161.465 | 8.990  | 0.250 | 0.0400 |
| FBgn0039360 | 32.310  | 2.834  | 0.124 | 0.0445 |
| FBgn0013743 | 739.488 | 21.570 | 0.315 | 0.0693 |
| FBgn0016700 | 28.636  | 1.418  | 0.035 | 0.0152 |
| FBgn0039272 | 19.199  | 1.871  | 0.091 | 0.0493 |
| FBgn0002631 | 689.593 | 31.718 | 0.729 | 0.5746 |
| FBgn0032378 | 44.321  | 2.312  | 0.060 | 0.0156 |
| FBgn0034357 | 96.624  | 6.548  | 0.222 | 0.0525 |
| FBgn0004406 | 99.565  | 4.756  | 0.114 | 0.0080 |
| FBgn0037950 | 786.328 | 16.679 | 0.177 | 0.0115 |
| FBgn0014010 | 38.648  | 1.799  | 0.042 | 0.0132 |
| FBgn0051814 | 217.486 | 10.624 | 0.260 | 0.0413 |
| FBgn0030521 | 684.221 | 19.314 | 0.273 | 0.0568 |
| FBgn0028955 | 795.904 | 12.807 | 0.103 | 0.0019 |
| FBgn0031478 | 12.561  | 1.976  | 0.155 | 0.1630 |
| FBgn0030992 | 24.773  | 4.555  | 0.419 | 0.2059 |
| FBgn0037543 | 28.516  | 2.491  | 0.109 | 0.0489 |
| FBgn0027534 | 63.694  | 3.398  | 0.091 | 0.0126 |
| FBgn0031012 | 17.241  | 2.231  | 0.144 | 0.0794 |
| FBgn0038595 | 15.276  | 1.512  | 0.075 | 0.0673 |
| FBgn0039756 | 22.311  | 1.665  | 0.062 | 0.0384 |
| FBgn0031755 | 43.051  | 6.992  | 0.568 | 0.3475 |
| FBgn0034442 | 34.330  | 3.952  | 0.227 | 0.0879 |
| FBgn0036199 | 17.679  | 2.168  | 0.133 | 0.0892 |
| FBgn0052260 | 33.417  | 5.274  | 0.416 | 0.1871 |
| FBgn0024945 | 27.177  | 4.630  | 0.394 | 0.1906 |
| FBgn0035422 | 696.788 | 30.201 | 0.654 | 0.4587 |
| FBgn0001108 | 20.816  | 2.147  | 0.111 | 0.0527 |
| FBgn0023444 | 39.608  | 3.790  | 0.181 | 0.0518 |
| FBgn0034481 | 10.354  | 2.570  | 0.319 | 0.2754 |
| FBgn0024509 | 11.709  | 1.658  | 0.117 | 0.1089 |
| FBgn0029980 | 836.696 | 12.277 | 0.090 | 0.0062 |
| FBgn0038466 | 44.248  | 4.129  | 0.193 | 0.0481 |
| FBgn0037431 | 75.149  | 8.063  | 0.433 | 0.2678 |
| FBgn0039117 | 21.662  | 3.472  | 0.278 | 0.1510 |
| FBgn0031835 | 30.971  | 6.667  | 0.718 | 0.5852 |

|             |         |        |       |        |
|-------------|---------|--------|-------|--------|
| FBgn0053128 | 49.746  | 3.944  | 0.156 | 0.0401 |
| FBgn0029693 | 35.850  | 3.546  | 0.175 | 0.0361 |
| FBgn0033442 | 162.962 | 6.292  | 0.121 | 0.0253 |
| FBgn0020616 | 32.607  | 2.732  | 0.114 | 0.0309 |
| FBgn0034196 | 23.798  | 3.113  | 0.204 | 0.0934 |
| FBgn0038853 | 60.757  | 4.831  | 0.192 | 0.0701 |
| FBgn0036191 | 845.215 | 11.108 | 0.073 | 0.0070 |
| FBgn0025825 | 64.878  | 3.516  | 0.095 | 0.0071 |
| FBgn0033483 | 27.213  | 2.990  | 0.164 | 0.0590 |
| FBgn0036198 | 28.470  | 4.159  | 0.304 | 0.1337 |
| FBgn0037135 | 762.659 | 12.770 | 0.107 | 0.0116 |
| FBgn0034109 | 801.824 | 11.510 | 0.083 | 0.0022 |
| FBgn0037262 | 19.097  | 4.744  | 0.589 | 0.4307 |
| FBgn0030966 | 28.236  | 2.742  | 0.133 | 0.0598 |
| FBgn0004413 | 44.812  | 5.999  | 0.402 | 0.1910 |
| FBgn0031327 | 34.253  | 3.901  | 0.222 | 0.0815 |
| FBgn0038410 | 11.505  | 1.822  | 0.144 | 0.1158 |
| FBgn0036663 | 23.380  | 1.169  | 0.029 | 0.0237 |
| FBgn0027575 | 51.584  | 5.434  | 0.286 | 0.0708 |
| FBgn0024832 | 19.421  | 2.859  | 0.210 | 0.1317 |
| FBgn0032751 | 15.765  | 5.561  | 0.981 | 0.9738 |
| FBgn0004839 | 38.717  | 2.999  | 0.116 | 0.0223 |
| FBgn0031702 | 22.325  | 2.353  | 0.124 | 0.0788 |
| FBgn0051643 | 38.563  | 3.463  | 0.155 | 0.0400 |
| FBgn0035724 | 27.863  | 3.082  | 0.170 | 0.0708 |
| FBgn0033736 | 652.078 | 26.718 | 0.547 | 0.3053 |
| FBgn0040305 | 731.666 | 20.248 | 0.280 | 0.0491 |
| FBgn0035996 | 746.225 | 30.361 | 0.618 | 0.4035 |
| FBgn0013469 | 21.816  | 3.175  | 0.231 | 0.1204 |
| FBgn0034692 | 780.713 | 19.213 | 0.236 | 0.0278 |
| FBgn0046887 | 25.652  | 3.416  | 0.227 | 0.0833 |
| FBgn0035601 | 7.931   | 1.368  | 0.118 | 0.1417 |
| FBgn0032774 | 12.395  | 3.354  | 0.454 | 0.3719 |
| FBgn0000258 | 12.732  | 2.323  | 0.212 | 0.2091 |
| FBgn0064766 | 17.060  | 1.911  | 0.107 | 0.0631 |
| FBgn0033339 | 93.665  | 6.169  | 0.203 | 0.0237 |
| FBgn0031973 | 47.637  | 3.762  | 0.149 | 0.0302 |
| FBgn0037920 | 17.405  | 4.035  | 0.468 | 0.3040 |
| FBgn0053525 | 33.364  | 2.698  | 0.109 | 0.0539 |
| FBgn0028925 | 15.286  | 1.940  | 0.123 | 0.0992 |
| FBgn0034451 | 16.637  | 1.486  | 0.066 | 0.0457 |
| FBgn0011283 | 23.531  | 4.080  | 0.354 | 0.1770 |
| FBgn0036723 | 20.765  | 2.404  | 0.139 | 0.0938 |
| FBgn0031436 | 728.970 | 21.031 | 0.303 | 0.0624 |
| FBgn0051323 | 30.678  | 4.182  | 0.285 | 0.1102 |
| FBgn0034768 | 35.643  | 4.977  | 0.348 | 0.1149 |
| FBgn0027492 | 116.159 | 5.007  | 0.108 | 0.0065 |
| FBgn0033246 | 567.521 | 18.285 | 0.295 | 0.0567 |
| FBgn0031661 | 25.414  | 3.387  | 0.226 | 0.1039 |
| FBgn0030753 | 766.748 | 10.002 | 0.065 | 0.0173 |
| FBgn0061359 | 26.664  | 4.855  | 0.442 | 0.2086 |
| FBgn0015793 | 762.319 | 15.035 | 0.148 | 0.0240 |
| FBgn0026721 | 794.240 | 12.816 | 0.103 | 0.0021 |
| FBgn0037739 | 17.090  | 1.853  | 0.100 | 0.0772 |

|             |         |        |       |        |
|-------------|---------|--------|-------|--------|
| FBgn0035591 | 16.449  | 1.636  | 0.081 | 0.0540 |
| FBgn0021979 | 647.265 | 10.690 | 0.088 | 0.0015 |
| FBgn0035941 | 15.382  | 2.467  | 0.198 | 0.1252 |
| FBgn0031514 | 10.628  | 3.811  | 0.683 | 0.6018 |
| FBgn0039541 | 63.001  | 3.763  | 0.112 | 0.0110 |
| FBgn0034013 | 37.586  | 4.721  | 0.296 | 0.0856 |
| FBgn0039738 | 749.957 | 20.237 | 0.273 | 0.0454 |
| FBgn0035415 | 49.257  | 4.691  | 0.223 | 0.0539 |
| FBgn0032703 | 14.682  | 2.348  | 0.188 | 0.1227 |
| FBgn0028668 | 116.169 | 8.210  | 0.290 | 0.0944 |
| FBgn0052174 | 28.236  | 2.416  | 0.103 | 0.0288 |
| FBgn0031655 | 26.994  | 3.566  | 0.236 | 0.0837 |
| FBgn0005585 | 22.888  | 3.636  | 0.289 | 0.1274 |
| FBgn0051465 | 802.807 | 10.239 | 0.065 | 0.0113 |
| FBgn0011204 | 607.154 | 22.782 | 0.427 | 0.1634 |
| FBgn0038109 | 17.421  | 3.684  | 0.390 | 0.2632 |
| FBgn0023541 | 847.623 | 18.311 | 0.198 | 0.0167 |
| FBgn0035540 | 680.327 | 18.699 | 0.257 | 0.0401 |
| FBgn0033130 | 11.523  | 1.687  | 0.124 | 0.1253 |
| FBgn0015569 | 16.061  | 6.177  | 1.188 | 0.7616 |
| FBgn0003075 | 410.728 | 5.462  | 0.036 | 0.0177 |
| FBgn0031324 | 624.357 | 22.678 | 0.412 | 0.1625 |
| FBgn0033766 | 22.317  | 2.887  | 0.187 | 0.0797 |
| FBgn0027596 | 110.837 | 7.311  | 0.241 | 0.0318 |
| FBgn0030641 | 30.828  | 3.914  | 0.248 | 0.0833 |
| FBgn0035663 | 32.176  | 3.826  | 0.227 | 0.0749 |
| FBgn0036381 | 822.101 | 24.341 | 0.360 | 0.1023 |
| FBgn0034215 | 43.151  | 3.544  | 0.146 | 0.0587 |
| FBgn0005696 | 58.331  | 8.425  | 0.608 | 0.3955 |
| FBgn0027590 | 71.763  | 6.374  | 0.283 | 0.0784 |
| FBgn0038058 | 9.597   | 1.648  | 0.141 | 0.1446 |
| FBgn0003267 | 77.302  | 9.011  | 0.525 | 0.2891 |
| FBgn0038685 | 822.533 | 9.270  | 0.052 | 0.0071 |
| FBgn0040771 | 41.173  | 2.089  | 0.053 | 0.0105 |
| FBgn0025355 | 22.950  | 4.356  | 0.413 | 0.2312 |
| FBgn0038546 | 44.778  | 4.346  | 0.211 | 0.0408 |
| FBgn0027090 | 14.291  | 1.421  | 0.071 | 0.0817 |
| FBgn0026309 | 9.890   | 2.651  | 0.355 | 0.2947 |
| FBgn0041711 | 109.216 | 7.312  | 0.245 | 0.0367 |
| FBgn0015905 | 18.974  | 4.231  | 0.472 | 0.2909 |
| FBgn0033813 | 749.271 | 19.610 | 0.257 | 0.0465 |
| FBgn0038825 | 741.436 | 39.389 | 1.046 | 0.9325 |
| FBgn0039754 | 36.482  | 7.505  | 0.772 | 0.6589 |
| FBgn0027586 | 770.877 | 19.307 | 0.242 | 0.0369 |
| FBgn0038912 | 808.941 | 18.989 | 0.223 | 0.0253 |
| FBgn0039869 | 13.889  | 2.414  | 0.210 | 0.1639 |
| FBgn0035594 | 614.212 | 21.771 | 0.386 | 0.1238 |
| FBgn0053512 | 9.811   | 4.312  | 0.947 | 0.9383 |
| FBgn0015664 | 937.738 | 7.338  | 0.029 | 0.0005 |
| FBgn0028375 | 22.968  | 2.761  | 0.166 | 0.0613 |
| FBgn0030336 | 88.488  | 5.638  | 0.180 | 0.0224 |
| FBgn0014861 | 741.853 | 16.133 | 0.175 | 0.0113 |
| FBgn0020880 | 6.274   | 1.909  | 0.290 | 0.3332 |
| FBgn0015806 | 24.151  | 2.625  | 0.143 | 0.0590 |

|             |         |        |       |        |
|-------------|---------|--------|-------|--------|
| FBgn0037816 | 20.124  | 3.663  | 0.333 | 0.1862 |
| FBgn0033437 | 144.431 | 6.658  | 0.153 | 0.0153 |
| FBgn0031296 | 131.783 | 7.770  | 0.229 | 0.0268 |
| FBgn0031996 | 681.115 | 14.677 | 0.158 | 0.0198 |
| FBgn0037601 | 18.107  | 4.112  | 0.467 | 0.3006 |
| FBgn0026441 | 687.880 | 19.738 | 0.283 | 0.0507 |
| FBgn0037710 | 42.910  | 3.941  | 0.181 | 0.0472 |
| FBgn0029814 | 731.892 | 25.385 | 0.440 | 0.1767 |
| FBgn0016013 | 40.541  | 3.847  | 0.183 | 0.0412 |
| FBgn0002466 | 125.380 | 7.961  | 0.253 | 0.0397 |
| FBgn0031903 | 654.822 | 13.377 | 0.137 | 0.0524 |
| FBgn0050291 | 95.019  | 5.881  | 0.182 | 0.0148 |
| FBgn0030417 | 673.057 | 28.084 | 0.586 | 0.3581 |
| FBgn0036165 | 834.353 | 13.248 | 0.105 | 0.0034 |
| FBgn0029131 | 32.939  | 2.728  | 0.113 | 0.0391 |
| FBgn0003022 | 6.908   | 1.389  | 0.140 | 0.1760 |
| FBgn0039244 | 777.773 | 19.646 | 0.248 | 0.0384 |
| FBgn0015222 | 55.288  | 2.600  | 0.061 | 0.0109 |
| FBgn0033354 | 93.383  | 3.081  | 0.051 | 0.0038 |
| FBgn0021767 | 750.491 | 22.808 | 0.347 | 0.0917 |
| FBgn0038388 | 728.820 | 16.509 | 0.187 | 0.0287 |
| FBgn0026409 | 18.716  | 3.128  | 0.261 | 0.1468 |
| FBgn0034390 | 58.404  | 2.647  | 0.060 | 0.0202 |
| FBgn0000054 | 715.666 | 17.247 | 0.208 | 0.0221 |
| FBgn0013342 | 37.234  | 4.315  | 0.250 | 0.0524 |
| FBgn0028871 | 81.079  | 10.444 | 0.673 | 0.5123 |
| FBgn0031419 | 31.368  | 3.779  | 0.228 | 0.0878 |
| FBgn0034403 | 109.631 | 4.800  | 0.105 | 0.0210 |
| FBgn0051473 | 36.719  | 2.991  | 0.122 | 0.0482 |
| FBgn0030300 | 160.344 | 9.162  | 0.262 | 0.0421 |
| FBgn0010292 | 21.412  | 3.173  | 0.235 | 0.1315 |
| FBgn0031898 | 19.174  | 2.252  | 0.132 | 0.0616 |
| FBgn0040362 | 800.457 | 13.220 | 0.109 | 0.0025 |
| FBgn0032698 | 612.098 | 14.087 | 0.162 | 0.0109 |
| FBgn0030494 | 14.846  | 2.725  | 0.250 | 0.1758 |
| FBgn0030853 | 29.545  | 4.765  | 0.384 | 0.1915 |
| FBgn0016672 | 21.425  | 4.137  | 0.399 | 0.1937 |
| FBgn0034299 | 30.789  | 2.560  | 0.106 | 0.0312 |
| FBgn0040239 | 18.694  | 3.133  | 0.263 | 0.1654 |
| FBgn0038110 | 35.278  | 3.220  | 0.147 | 0.0647 |
| FBgn0005636 | 796.020 | 20.227 | 0.257 | 0.0378 |
| FBgn0039663 | 29.321  | 1.671  | 0.048 | 0.0186 |
| FBgn0034673 | 21.330  | 4.019  | 0.379 | 0.2095 |
| FBgn0034097 | 4.167   | 1.768  | 0.375 | 0.4536 |
| FBgn0037506 | 7.020   | 1.484  | 0.157 | 0.2020 |
| FBgn0024294 | 12.434  | 1.070  | 0.046 | 0.0714 |
| FBgn0036923 | 774.338 | 25.601 | 0.423 | 0.1551 |
| FBgn0025643 | 188.227 | 7.792  | 0.161 | 0.0087 |
| FBgn0050044 | 19.340  | 1.649  | 0.070 | 0.0542 |
| FBgn0037330 | 885.255 | 8.919  | 0.045 | 0.0008 |
| FBgn0040949 | 7.820   | 2.326  | 0.346 | 0.3504 |
| FBgn0050089 | 138.230 | 18.005 | 1.173 | 0.7596 |
| FBgn0040360 | 14.459  | 3.592  | 0.446 | 0.2858 |
| FBgn0035586 | 628.531 | 30.465 | 0.738 | 0.5882 |



|             |         |        |       |        |
|-------------|---------|--------|-------|--------|
| FBgn0051156 | 17.192  | 2.581  | 0.194 | 0.1374 |
| FBgn0025686 | 21.537  | 4.533  | 0.477 | 0.2959 |
| FBgn0034660 | 56.539  | 4.764  | 0.201 | 0.0332 |
| FBgn0002899 | 789.415 | 11.857 | 0.089 | 0.0166 |
| FBgn0026192 | 13.738  | 1.442  | 0.076 | 0.0662 |
| FBgn0039128 | 28.128  | 2.851  | 0.145 | 0.0549 |
| FBgn0033564 | 29.283  | 2.271  | 0.088 | 0.0278 |
| FBgn0051961 | 739.227 | 16.275 | 0.179 | 0.0117 |
| FBgn0028974 | 20.139  | 4.538  | 0.511 | 0.3366 |
| FBgn0004359 | 66.563  | 2.690  | 0.054 | 0.0045 |
| FBgn0046880 | 716.815 | 11.353 | 0.090 | 0.0065 |
| FBgn0039303 | 41.501  | 6.598  | 0.525 | 0.2909 |
| FBgn0004907 | 24.394  | 3.566  | 0.261 | 0.1322 |
| FBgn0038124 | 655.434 | 19.005 | 0.276 | 0.0468 |
| FBgn0030528 | 815.546 | 17.280 | 0.183 | 0.0130 |
| FBgn0011693 | 54.109  | 3.643  | 0.123 | 0.0373 |
| FBgn0037852 | 14.347  | 1.573  | 0.086 | 0.0591 |
| FBgn0039655 | 785.217 | 26.277 | 0.440 | 0.1761 |
| FBgn0038429 | 27.298  | 3.522  | 0.227 | 0.0858 |
| FBgn0031875 | 639.016 | 9.224  | 0.067 | 0.0011 |
| FBgn0032729 | 30.896  | 4.126  | 0.276 | 0.1151 |
| FBgn0031268 | 101.236 | 4.803  | 0.114 | 0.0123 |
| FBgn0032915 | 75.307  | 2.303  | 0.035 | 0.0049 |
| FBgn0040206 | 33.340  | 4.871  | 0.356 | 0.1569 |
| FBgn0038469 | 44.093  | 5.589  | 0.354 | 0.1179 |
| FBgn0001989 | 20.810  | 4.246  | 0.433 | 0.2611 |
| FBgn0034567 | 19.135  | 2.576  | 0.173 | 0.1088 |
| FBgn0031619 | 500.308 | 15.582 | 0.243 | 0.0656 |
| FBgn0053231 | 706.248 | 22.954 | 0.373 | 0.1540 |
| FBgn0050015 | 720.408 | 13.777 | 0.132 | 0.0110 |
| FBgn0026729 | 29.191  | 4.625  | 0.366 | 0.1780 |
| FBgn0034186 | 22.779  | 2.904  | 0.185 | 0.0888 |
| FBgn0032018 | 41.177  | 3.214  | 0.125 | 0.0246 |
| FBgn0035877 | 88.679  | 2.075  | 0.024 | 0.0022 |
| FBgn0003515 | 19.108  | 3.278  | 0.281 | 0.1628 |
| FBgn0040273 | 19.888  | 2.459  | 0.152 | 0.0885 |
| FBgn0036690 | 21.073  | 4.161  | 0.411 | 0.2199 |
| FBgn0031993 | 103.558 | 9.523  | 0.438 | 0.1754 |
| FBgn0033983 | 686.275 | 23.023 | 0.386 | 0.1334 |
| FBgn0041203 | 805.494 | 14.861 | 0.137 | 0.0050 |
| FBgn0045495 | 42.398  | 3.510  | 0.145 | 0.0444 |
| FBgn0035170 | 34.305  | 7.125  | 0.740 | 0.6060 |
| FBgn0039537 | 51.159  | 4.092  | 0.164 | 0.0310 |
| FBgn0038219 | 8.079   | 1.312  | 0.107 | 0.1586 |
| FBgn0050387 | 732.928 | 14.346 | 0.140 | 0.0120 |
| FBgn0043002 | 580.919 | 23.566 | 0.478 | 0.2175 |
| FBgn0000140 | 23.186  | 2.141  | 0.099 | 0.0503 |
| FBgn0037815 | 25.935  | 2.220  | 0.095 | 0.0297 |
| FBgn0032119 | 29.612  | 3.906  | 0.258 | 0.1000 |
| FBgn0038175 | 737.923 | 10.914 | 0.081 | 0.0020 |
| FBgn0053967 | 702.446 | 29.298 | 0.611 | 0.3951 |
| FBgn0038609 | 768.887 | 14.698 | 0.140 | 0.0178 |
| FBgn0004643 | 30.161  | 3.140  | 0.163 | 0.0657 |
| FBgn0003016 | 21.902  | 2.056  | 0.097 | 0.0492 |

|             |         |        |       |        |
|-------------|---------|--------|-------|--------|
| FBgn0028538 | 124.411 | 7.905  | 0.251 | 0.0359 |
| FBgn0028426 | 24.807  | 2.813  | 0.159 | 0.0542 |
| FBgn0035023 | 31.501  | 5.509  | 0.482 | 0.2434 |
| FBgn0033369 | 776.456 | 8.240  | 0.044 | 0.0022 |
| FBgn0038282 | 14.206  | 3.896  | 0.534 | 0.4113 |
| FBgn0036520 | 704.151 | 28.540 | 0.578 | 0.3478 |
| FBgn0031530 | 137.466 | 7.840  | 0.224 | 0.0249 |
| FBgn0038438 | 19.166  | 3.233  | 0.273 | 0.1421 |
| FBgn0033697 | 767.990 | 16.446 | 0.176 | 0.0237 |
| FBgn0030271 | 21.632  | 3.345  | 0.259 | 0.1295 |
| FBgn0037578 | 723.028 | 21.933 | 0.333 | 0.1328 |
| FBgn0038043 | 9.778   | 3.110  | 0.495 | 0.4161 |
| FBgn0038418 | 85.148  | 7.088  | 0.295 | 0.0822 |
| FBgn0039731 | 786.571 | 13.759 | 0.120 | 0.0111 |
| FBgn0035164 | 58.752  | 4.860  | 0.201 | 0.0260 |
| FBgn0034728 | 62.752  | 3.809  | 0.116 | 0.0326 |
| FBgn0051115 | 11.581  | 3.542  | 0.542 | 0.4376 |
| FBgn0032163 | 38.536  | 3.835  | 0.191 | 0.0746 |
| FBgn0028504 | 47.797  | 5.282  | 0.292 | 0.0767 |
| FBgn0028736 | 15.550  | 2.352  | 0.178 | 0.1226 |
| FBgn0031245 | 19.585  | 2.756  | 0.194 | 0.0800 |
| FBgn0035555 | 570.974 | 24.661 | 0.533 | 0.3511 |
| FBgn0038856 | 29.053  | 1.617  | 0.045 | 0.0287 |
| FBgn0031609 | 27.817  | 3.270  | 0.192 | 0.0533 |
| FBgn0039349 | 8.231   | 1.473  | 0.132 | 0.1534 |
| FBgn0037553 | 12.532  | 3.859  | 0.594 | 0.4958 |
| FBgn0032260 | 767.103 | 13.891 | 0.126 | 0.0489 |
| FBgn0034050 | 40.125  | 3.720  | 0.172 | 0.0613 |
| FBgn0003401 | 716.718 | 14.901 | 0.155 | 0.0217 |
| FBgn0003270 | 21.845  | 5.555  | 0.706 | 0.5751 |
| FBgn0031528 | 25.446  | 2.911  | 0.167 | 0.0565 |
| FBgn0014000 | 41.823  | 3.611  | 0.156 | 0.0442 |
| FBgn0034407 | 28.934  | 3.095  | 0.166 | 0.0404 |
| FBgn0039674 | 24.293  | 2.432  | 0.122 | 0.0505 |
| FBgn0030352 | 29.072  | 2.750  | 0.130 | 0.0361 |
| FBgn0037093 | 81.981  | 5.241  | 0.168 | 0.0148 |
| FBgn0028904 | 62.515  | 5.945  | 0.283 | 0.0795 |
| FBgn0033415 | 17.678  | 4.709  | 0.627 | 0.4606 |
| FBgn0039650 | 21.007  | 4.909  | 0.574 | 0.3935 |
| FBgn0039464 | 21.544  | 2.226  | 0.115 | 0.0702 |
| FBgn0037960 | 785.242 | 13.688 | 0.119 | 0.0048 |
| FBgn0036272 | 762.447 | 19.868 | 0.259 | 0.0387 |
| FBgn0036115 | 32.897  | 2.531  | 0.097 | 0.0244 |
| FBgn0032761 | 7.193   | 1.633  | 0.185 | 0.2163 |
| FBgn0037718 | 18.950  | 1.499  | 0.059 | 0.0484 |
| FBgn0051790 | 32.207  | 4.165  | 0.269 | 0.1176 |
| FBgn0038617 | 71.781  | 7.111  | 0.352 | 0.1332 |
| FBgn0030965 | 26.160  | 6.079  | 0.706 | 0.5717 |
| FBgn0036236 | 12.613  | 3.027  | 0.363 | 0.2924 |
| FBgn0034583 | 710.958 | 20.946 | 0.309 | 0.0655 |
| FBgn0034114 | 78.137  | 5.001  | 0.160 | 0.0372 |
| FBgn0031773 | 108.760 | 7.480  | 0.257 | 0.0424 |
| FBgn0033919 | 12.379  | 2.920  | 0.344 | 0.2882 |
| FBgn0030828 | 13.648  | 2.770  | 0.281 | 0.1925 |

|             |         |        |       |        |
|-------------|---------|--------|-------|--------|
| FBgn0038716 | 816.035 | 15.053 | 0.139 | 0.0072 |
| FBgn0036959 | 846.282 | 15.258 | 0.138 | 0.0051 |
| FBgn0023495 | 775.954 | 23.784 | 0.365 | 0.1057 |
| FBgn0032845 | 759.521 | 15.563 | 0.159 | 0.0118 |
| FBgn0030723 | 700.554 | 17.850 | 0.227 | 0.0965 |
| FBgn0035020 | 20.696  | 3.769  | 0.343 | 0.1702 |
| FBgn0000715 | 17.052  | 2.462  | 0.178 | 0.0993 |
| FBgn0031037 | 593.835 | 21.757 | 0.399 | 0.1352 |
| FBgn0037541 | 24.589  | 4.809  | 0.470 | 0.2436 |
| FBgn0029931 | 30.904  | 7.228  | 0.845 | 0.7813 |
| FBgn0038576 | 89.661  | 7.723  | 0.333 | 0.0857 |
| FBgn0035142 | 672.470 | 19.965 | 0.296 | 0.0581 |
| FBgn0028633 | 42.921  | 3.413  | 0.136 | 0.0288 |
| FBgn0029781 | 128.395 | 8.797  | 0.301 | 0.0623 |
| FBgn0032642 | 755.980 | 13.795 | 0.126 | 0.0097 |
| FBgn0036312 | 18.735  | 4.095  | 0.448 | 0.2933 |
| FBgn0040153 | 737.608 | 23.188 | 0.364 | 0.1054 |
| FBgn0053276 | 32.098  | 3.590  | 0.201 | 0.0460 |
| FBgn0035113 | 25.295  | 2.495  | 0.123 | 0.0356 |
| FBgn0034925 | 11.116  | 2.239  | 0.225 | 0.1795 |
| FBgn0035992 | 17.470  | 3.974  | 0.452 | 0.2696 |
| FBgn0040851 | 781.989 | 25.435 | 0.414 | 0.1496 |
| FBgn0038118 | 20.858  | 4.940  | 0.585 | 0.4075 |
| FBgn0042135 | 739.649 | 9.113  | 0.056 | 0.0262 |
| FBgn0003448 | 116.168 | 9.707  | 0.406 | 0.1427 |
| FBgn0010258 | 34.144  | 4.205  | 0.259 | 0.1077 |
| FBgn0031392 | 731.186 | 16.327 | 0.182 | 0.0141 |
| FBgn0038826 | 36.779  | 6.085  | 0.503 | 0.2918 |
| FBgn0033453 | 13.156  | 3.201  | 0.389 | 0.2640 |
| FBgn0024995 | 644.737 | 15.272 | 0.181 | 0.0173 |
| FBgn0000709 | 39.981  | 3.360  | 0.141 | 0.0368 |
| FBgn0031000 | 9.993   | 3.226  | 0.521 | 0.4466 |
| FBgn0002044 | 825.142 | 9.326  | 0.053 | 0.0072 |
| FBgn0042085 | 797.497 | 15.188 | 0.145 | 0.0060 |
| FBgn0039558 | 17.765  | 3.393  | 0.324 | 0.1560 |
| FBgn0032960 | 30.207  | 2.884  | 0.138 | 0.0611 |
| FBgn0023416 | 23.870  | 5.744  | 0.691 | 0.5350 |
| FBgn0031979 | 4.144   | 3.016  | 1.097 | 0.9182 |
| FBgn0000084 | 47.145  | 6.780  | 0.488 | 0.2421 |
| FBgn0032889 | 8.002   | 2.631  | 0.433 | 0.4009 |
| FBgn0041233 | 13.805  | 2.722  | 0.268 | 0.1999 |
| FBgn0028970 | 16.710  | 1.475  | 0.065 | 0.0505 |
| FBgn0033685 | 681.725 | 13.907 | 0.142 | 0.0096 |
| FBgn0016693 | 10.853  | 1.303  | 0.078 | 0.0764 |
| FBgn0016123 | 856.887 | 16.861 | 0.166 | 0.0090 |
| FBgn0033162 | 65.773  | 2.428  | 0.045 | 0.0057 |
| FBgn0028546 | 688.176 | 10.194 | 0.075 | 0.0029 |
| FBgn0002906 | 104.105 | 4.365  | 0.092 | 0.0050 |
| FBgn0035329 | 23.047  | 4.098  | 0.364 | 0.1795 |
| FBgn0015794 | 12.155  | 3.534  | 0.514 | 0.4043 |
| FBgn0020238 | 66.399  | 6.077  | 0.278 | 0.0659 |
| FBgn0034706 | 67.126  | 3.465  | 0.089 | 0.0262 |
| FBgn0032191 | 17.086  | 2.664  | 0.208 | 0.1346 |
| FBgn0044051 | 760.599 | 23.778 | 0.372 | 0.1116 |

|             |         |        |       |        |
|-------------|---------|--------|-------|--------|
| FBgn0043001 | 64.921  | 6.406  | 0.316 | 0.0905 |
| FBgn0037482 | 14.011  | 2.570  | 0.236 | 0.1655 |
| FBgn0034411 | 654.722 | 14.158 | 0.153 | 0.0295 |
| FBgn0030989 | 14.251  | 2.123  | 0.158 | 0.1427 |
| FBgn0036207 | 754.645 | 13.932 | 0.129 | 0.0056 |
| FBgn0034727 | 63.899  | 6.344  | 0.315 | 0.0853 |
| FBgn0000406 | 734.055 | 18.145 | 0.224 | 0.0243 |
| FBgn0067628 | 16.405  | 3.534  | 0.381 | 0.2782 |
| FBgn0030408 | 4.284   | 2.502  | 0.731 | 0.7728 |
| FBgn0000634 | 19.806  | 4.842  | 0.592 | 0.4017 |
| FBgn0035985 | 47.260  | 3.508  | 0.130 | 0.0296 |
| FBgn0033055 | 30.959  | 3.996  | 0.258 | 0.1086 |
| FBgn0029813 | 719.300 | 22.981 | 0.367 | 0.1077 |
| FBgn0038423 | 130.100 | 8.531  | 0.280 | 0.0798 |
| FBgn0035059 | 862.530 | 9.924  | 0.057 | 0.0009 |
| FBgn0011672 | 114.216 | 12.137 | 0.645 | 0.4447 |
| FBgn0031817 | 29.796  | 3.832  | 0.246 | 0.1120 |
| FBgn0026196 | 99.155  | 5.715  | 0.165 | 0.0324 |
| FBgn0037412 | 15.344  | 2.186  | 0.156 | 0.0923 |
| FBgn0052645 | 650.982 | 21.335 | 0.350 | 0.0936 |
| FBgn0034579 | 27.067  | 3.961  | 0.290 | 0.1251 |
| FBgn0036064 | 778.343 | 14.472 | 0.135 | 0.0283 |
| FBgn0033104 | 22.740  | 2.261  | 0.112 | 0.0624 |
| FBgn0020279 | 749.480 | 19.363 | 0.250 | 0.0348 |
| FBgn0032434 | 393.364 | 14.514 | 0.268 | 0.0616 |
| FBgn0037563 | 26.876  | 4.382  | 0.357 | 0.1482 |
| FBgn0034217 | 41.039  | 5.031  | 0.308 | 0.1019 |
| FBgn0036382 | 644.437 | 12.338 | 0.118 | 0.0181 |
| FBgn0038028 | 690.058 | 15.860 | 0.182 | 0.0264 |
| FBgn0002773 | 738.759 | 36.395 | 0.897 | 0.8403 |
| FBgn0039883 | 5.874   | 1.027  | 0.090 | 0.1537 |
| FBgn0030395 | 543.345 | 16.837 | 0.261 | 0.0408 |
| FBgn0052130 | 748.740 | 17.232 | 0.198 | 0.0173 |
| FBgn0034237 | 23.525  | 2.802  | 0.167 | 0.0686 |
| FBgn0003210 | 683.454 | 20.937 | 0.321 | 0.0733 |
| FBgn0050461 | 681.778 | 17.280 | 0.219 | 0.0367 |
| FBgn0023506 | 8.255   | 1.271  | 0.098 | 0.1466 |
| FBgn0038961 | 62.908  | 1.396  | 0.015 | 0.0038 |
| FBgn0033079 | 762.594 | 12.365 | 0.100 | 0.0115 |
| FBgn0038921 | 11.203  | 2.526  | 0.285 | 0.2228 |
| FBgn0035425 | 9.797   | 2.785  | 0.396 | 0.3629 |
| FBgn0037202 | 13.550  | 3.054  | 0.344 | 0.2523 |
| FBgn0039198 | 651.193 | 22.561 | 0.391 | 0.1283 |
| FBgn0032833 | 14.886  | 3.124  | 0.328 | 0.2104 |
| FBgn0050421 | 761.771 | 15.771 | 0.163 | 0.0089 |
| FBgn0052732 | 631.673 | 12.237 | 0.119 | 0.0159 |
| FBgn0035181 | 18.122  | 1.773  | 0.087 | 0.0474 |
| FBgn0031322 | 738.800 | 12.633 | 0.108 | 0.0057 |
| FBgn0035873 | 33.849  | 7.088  | 0.742 | 0.6215 |
| FBgn0015371 | 203.800 | 5.921  | 0.086 | 0.0062 |
| FBgn0000422 | 35.028  | 3.387  | 0.164 | 0.0543 |
| FBgn0033781 | 594.261 | 24.990 | 0.525 | 0.2764 |
| FBgn0038003 | 775.513 | 13.350 | 0.115 | 0.0082 |
| FBgn0034650 | 7.250   | 1.902  | 0.250 | 0.2830 |

|             |         |        |       |        |
|-------------|---------|--------|-------|--------|
| FBgn0032476 | 24.593  | 1.679  | 0.057 | 0.0411 |
| FBgn0036135 | 19.050  | 1.827  | 0.088 | 0.0689 |
| FBgn0027495 | 66.179  | 3.527  | 0.094 | 0.0091 |
| FBgn0030790 | 638.675 | 11.809 | 0.109 | 0.0074 |
| FBgn0034066 | 774.845 | 14.099 | 0.128 | 0.0041 |
| FBgn0051216 | 41.587  | 5.655  | 0.384 | 0.1594 |
| FBgn0035838 | 102.112 | 5.612  | 0.154 | 0.0328 |
| FBgn0037386 | 25.582  | 2.378  | 0.111 | 0.0461 |
| FBgn0035379 | 6.012   | 1.642  | 0.224 | 0.2815 |
| FBgn0000411 | 84.458  | 4.831  | 0.138 | 0.0140 |
| FBgn0026319 | 6.327   | 1.528  | 0.185 | 0.2320 |
| FBgn0032350 | 29.844  | 2.240  | 0.084 | 0.0410 |
| FBgn0023091 | 19.804  | 4.549  | 0.522 | 0.3324 |
| FBgn0028895 | 119.499 | 6.943  | 0.202 | 0.0560 |
| FBgn0014466 | 719.272 | 36.533 | 0.928 | 0.8902 |
| FBgn0050172 | 62.224  | 9.026  | 0.655 | 0.4656 |
| FBgn0053179 | 10.622  | 2.414  | 0.274 | 0.2629 |
| FBgn0035046 | 57.405  | 5.825  | 0.296 | 0.0660 |
| FBgn0033473 | 731.177 | 10.770 | 0.079 | 0.0183 |
| FBgn0036686 | 75.703  | 3.746  | 0.093 | 0.0129 |
| FBgn0033021 | 717.495 | 18.652 | 0.242 | 0.1004 |
| FBgn0035276 | 742.102 | 14.776 | 0.147 | 0.0084 |
| FBgn0040849 | 5.048   | 3.037  | 0.914 | 0.9216 |
| FBgn0034155 | 45.307  | 2.551  | 0.072 | 0.0134 |
| FBgn0034380 | 98.932  | 5.015  | 0.127 | 0.0095 |
| FBgn0000247 | 691.219 | 11.721 | 0.099 | 0.0018 |
| FBgn0031367 | 26.324  | 5.638  | 0.604 | 0.4418 |
| FBgn0037870 | 52.601  | 5.667  | 0.305 | 0.0980 |
| FBgn0016032 | 625.861 | 25.276 | 0.510 | 0.2576 |
| FBgn0015240 | 23.121  | 3.980  | 0.343 | 0.1377 |
| FBgn0036223 | 774.664 | 14.040 | 0.127 | 0.0113 |
| FBgn0035026 | 25.450  | 3.824  | 0.287 | 0.0908 |
| FBgn0020370 | 77.781  | 4.451  | 0.127 | 0.0248 |
| FBgn0013531 | 776.705 | 12.536 | 0.101 | 0.0058 |
| FBgn0030749 | 755.981 | 18.116 | 0.217 | 0.0372 |
| FBgn0038150 | 19.984  | 4.144  | 0.430 | 0.2459 |
| FBgn0038652 | 74.908  | 5.131  | 0.176 | 0.0312 |
| FBgn0002780 | 7.915   | 2.064  | 0.269 | 0.2858 |
| FBgn0039723 | 682.772 | 22.892 | 0.384 | 0.1711 |
| FBgn0036509 | 886.782 | 13.437 | 0.102 | 0.0019 |
| FBgn0033233 | 13.371  | 2.366  | 0.209 | 0.1640 |
| FBgn0035762 | 3.915   | 2.480  | 0.785 | 0.8187 |
| FBgn0033734 | 707.208 | 21.098 | 0.315 | 0.0694 |
| FBgn0035187 | 690.934 | 20.523 | 0.305 | 0.1157 |
| FBgn0011743 | 20.418  | 2.404  | 0.142 | 0.0592 |
| FBgn0031001 | 814.270 | 18.276 | 0.205 | 0.0202 |
| FBgn0014395 | 28.496  | 2.600  | 0.119 | 0.0550 |
| FBgn0042102 | 807.675 | 12.599 | 0.098 | 0.0027 |
| FBgn0000077 | 89.614  | 4.867  | 0.132 | 0.0420 |
| FBgn0033970 | 106.398 | 4.193  | 0.083 | 0.0125 |
| FBgn0038380 | 10.962  | 2.349  | 0.252 | 0.2528 |
| FBgn0061476 | 185.438 | 8.627  | 0.201 | 0.0175 |
| FBgn0032120 | 22.303  | 4.863  | 0.530 | 0.3475 |
| FBgn0000368 | 745.723 | 18.875 | 0.239 | 0.0339 |

|             |         |        |       |        |
|-------------|---------|--------|-------|--------|
| FBgn0030680 | 597.946 | 16.548 | 0.229 | 0.0685 |
| FBgn0036213 | 614.718 | 19.658 | 0.314 | 0.0797 |
| FBgn0030159 | 72.318  | 9.914  | 0.680 | 0.5020 |
| FBgn0053229 | 719.428 | 6.563  | 0.030 | 0.0011 |
| FBgn0038235 | 24.556  | 5.111  | 0.532 | 0.3585 |
| FBgn0035121 | 763.806 | 10.295 | 0.069 | 0.0158 |
| FBgn0015521 | 722.508 | 14.780 | 0.151 | 0.0182 |
| FBgn0036834 | 23.602  | 4.083  | 0.353 | 0.1766 |
| FBgn0030872 | 20.934  | 3.183  | 0.242 | 0.1274 |
| FBgn0016038 | 779.492 | 14.146 | 0.128 | 0.0075 |
| FBgn0038196 | 18.954  | 4.483  | 0.530 | 0.3422 |
| FBgn0033994 | 98.566  | 5.595  | 0.159 | 0.0280 |
| FBgn0000635 | 696.253 | 18.026 | 0.233 | 0.0606 |
| FBgn0053147 | 7.722   | 1.281  | 0.106 | 0.1400 |
| FBgn0037142 | 781.640 | 18.302 | 0.214 | 0.0266 |
| FBgn0026079 | 15.101  | 2.150  | 0.153 | 0.1136 |
| FBgn0027785 | 846.161 | 11.844 | 0.083 | 0.0021 |
| FBgn0036146 | 622.660 | 20.118 | 0.325 | 0.1333 |
| FBgn0039859 | 11.666  | 2.560  | 0.281 | 0.2266 |
| FBgn0035569 | 26.401  | 4.061  | 0.312 | 0.1468 |
| FBgn0021764 | 34.624  | 8.321  | 1.000 | 0.9991 |
| FBgn0030838 | 3.924   | 2.284  | 0.665 | 0.7203 |
| FBgn0011586 | 16.958  | 3.216  | 0.305 | 0.2089 |
| FBgn0000075 | 13.989  | 3.297  | 0.389 | 0.2859 |
| FBgn0037922 | 37.419  | 2.755  | 0.101 | 0.0332 |
| FBgn0038815 | 72.832  | 8.157  | 0.457 | 0.2043 |
| FBgn0002931 | 28.512  | 6.106  | 0.654 | 0.5005 |
| FBgn0035627 | 25.657  | 7.095  | 0.981 | 0.9740 |
| FBgn0038565 | 24.048  | 3.075  | 0.197 | 0.0936 |
| FBgn0050415 | 8.895   | 3.242  | 0.591 | 0.5386 |
| FBgn0026576 | 8.749   | 1.157  | 0.077 | 0.1155 |
| FBgn0051450 | 47.974  | 5.920  | 0.365 | 0.1212 |
| FBgn0028381 | 6.597   | 2.520  | 0.481 | 0.5054 |
| FBgn0027359 | 747.547 | 18.642 | 0.232 | 0.0362 |
| FBgn0015279 | 11.520  | 3.191  | 0.442 | 0.3505 |
| FBgn0051221 | 711.843 | 23.381 | 0.384 | 0.1213 |
| FBgn0027291 | 598.377 | 22.476 | 0.422 | 0.1519 |
| FBgn0031187 | 27.914  | 2.846  | 0.145 | 0.0367 |
| FBgn0032721 | 8.739   | 2.371  | 0.322 | 0.3181 |
| FBgn0003996 | 759.393 | 22.360 | 0.329 | 0.0790 |
| FBgn0036659 | 757.754 | 17.370 | 0.199 | 0.0197 |
| FBgn0035160 | 24.393  | 3.952  | 0.320 | 0.1232 |
| FBgn0020386 | 741.459 | 9.643  | 0.063 | 0.0007 |
| FBgn0035471 | 758.575 | 20.797 | 0.285 | 0.0552 |
| FBgn0050077 | 21.312  | 2.109  | 0.104 | 0.0624 |
| FBgn0036285 | 780.305 | 16.056 | 0.165 | 0.0138 |
| FBgn0026602 | 647.650 | 21.200 | 0.347 | 0.0920 |
| FBgn0032597 | 14.517  | 2.637  | 0.240 | 0.1634 |
| FBgn0034913 | 658.399 | 16.239 | 0.200 | 0.0174 |
| FBgn0020611 | 30.098  | 4.763  | 0.377 | 0.1876 |
| FBgn0037656 | 25.201  | 2.924  | 0.170 | 0.0603 |
| FBgn0025615 | 725.336 | 20.691 | 0.295 | 0.0591 |
| FBgn0035290 | 25.939  | 2.731  | 0.144 | 0.0713 |
| FBgn0027605 | 18.034  | 1.512  | 0.063 | 0.0416 |

|             |         |        |       |        |
|-------------|---------|--------|-------|--------|
| FBgn0034092 | 732.729 | 25.176 | 0.433 | 0.1924 |
| FBgn0037925 | 799.312 | 13.662 | 0.117 | 0.0095 |
| FBgn0002552 | 67.468  | 3.562  | 0.094 | 0.0249 |
| FBgn0052121 | 7.651   | 1.547  | 0.156 | 0.1795 |
| FBgn0030017 | 123.682 | 3.521  | 0.050 | 0.0050 |
| FBgn0039184 | 763.679 | 13.882 | 0.126 | 0.0038 |
| FBgn0031730 | 84.692  | 3.360  | 0.067 | 0.0222 |
| FBgn0035714 | 78.419  | 7.174  | 0.328 | 0.0810 |
| FBgn0024996 | 9.791   | 1.832  | 0.171 | 0.1794 |
| FBgn0036377 | 33.750  | 2.588  | 0.099 | 0.0262 |
| FBgn0032337 | 14.668  | 2.934  | 0.293 | 0.1951 |
| FBgn0024732 | 50.129  | 2.840  | 0.080 | 0.0147 |
| FBgn0015040 | 26.722  | 3.584  | 0.240 | 0.1147 |
| FBgn0003501 | 30.715  | 2.759  | 0.124 | 0.0547 |
| FBgn0011296 | 127.215 | 4.842  | 0.092 | 0.0139 |
| FBgn0033056 | 38.934  | 4.438  | 0.253 | 0.0901 |
| FBgn0041243 | 37.258  | 3.161  | 0.134 | 0.0280 |
| FBgn0003651 | 788.569 | 13.672 | 0.119 | 0.0173 |
| FBgn0053509 | 47.849  | 9.361  | 0.916 | 0.8764 |
| FBgn0030005 | 209.324 | 9.768  | 0.228 | 0.0407 |
| FBgn0036995 | 30.076  | 2.611  | 0.113 | 0.0305 |
| FBgn0035411 | 13.926  | 0.737  | 0.019 | 0.0328 |
| FBgn0002354 | 206.769 | 16.325 | 0.644 | 0.4435 |
| FBgn0037566 | 12.125  | 1.224  | 0.062 | 0.0791 |
| FBgn0023512 | 144.557 | 9.650  | 0.322 | 0.1185 |
| FBgn0027556 | 750.222 | 25.086 | 0.419 | 0.2216 |
| FBgn0040091 | 15.064  | 2.976  | 0.294 | 0.1871 |
| FBgn0032029 | 27.730  | 2.828  | 0.144 | 0.0572 |
| FBgn0038477 | 13.349  | 3.339  | 0.418 | 0.3228 |
| FBgn0015949 | 41.446  | 6.064  | 0.444 | 0.2155 |
| FBgn0032383 | 837.131 | 17.838 | 0.190 | 0.0147 |
| FBgn0004842 | 28.179  | 3.211  | 0.183 | 0.0793 |
| FBgn0026396 | 4.677   | 1.247  | 0.166 | 0.2472 |
| FBgn0031927 | 35.836  | 4.289  | 0.257 | 0.0811 |
| FBgn0039151 | 7.052   | 2.012  | 0.287 | 0.3199 |
| FBgn0038603 | 790.043 | 9.576  | 0.058 | 0.0025 |
| FBgn0035076 | 767.869 | 15.657 | 0.160 | 0.0250 |
| FBgn0037894 | 43.078  | 3.690  | 0.158 | 0.0389 |
| FBgn0028968 | 36.654  | 5.559  | 0.422 | 0.1769 |
| FBgn0030863 | 36.865  | 3.635  | 0.179 | 0.0542 |
| FBgn0035769 | 18.413  | 2.510  | 0.171 | 0.0852 |
| FBgn0032045 | 766.426 | 24.541 | 0.393 | 0.1307 |
| FBgn0038310 | 786.740 | 15.354 | 0.150 | 0.0068 |
| FBgn0039790 | 54.558  | 3.913  | 0.140 | 0.0369 |
| FBgn0036742 | 904.109 | 10.484 | 0.061 | 0.0012 |
| FBgn0035227 | 20.510  | 3.451  | 0.290 | 0.1254 |
| FBgn0032848 | 25.475  | 4.303  | 0.363 | 0.1830 |
| FBgn0031972 | 14.044  | 4.632  | 0.764 | 0.6863 |
| FBgn0039078 | 688.790 | 25.425 | 0.469 | 0.2027 |
| FBgn0040228 | 26.624  | 2.897  | 0.158 | 0.0649 |
| FBgn0011290 | 696.593 | 14.797 | 0.157 | 0.0248 |
| FBgn0039562 | 26.897  | 2.795  | 0.145 | 0.0479 |
| FBgn0040906 | 39.918  | 5.575  | 0.389 | 0.1557 |
| FBgn0000318 | 729.211 | 16.938 | 0.197 | 0.0164 |

|             |         |        |       |        |
|-------------|---------|--------|-------|--------|
| FBgn0036752 | 821.551 | 13.022 | 0.103 | 0.0019 |
| FBgn0031538 | 592.087 | 11.980 | 0.121 | 0.0118 |
| FBgn0030456 | 759.836 | 20.617 | 0.280 | 0.0489 |
| FBgn0033971 | 735.305 | 13.070 | 0.116 | 0.0255 |
| FBgn0011474 | 791.015 | 18.310 | 0.212 | 0.0207 |
| FBgn0030055 | 95.845  | 3.313  | 0.057 | 0.0163 |
| FBgn0026083 | 20.126  | 3.751  | 0.349 | 0.1892 |
| FBgn0022085 | 64.340  | 4.137  | 0.133 | 0.0270 |
| FBgn0035374 | 18.869  | 3.210  | 0.273 | 0.1644 |
| FBgn0029861 | 45.847  | 4.240  | 0.196 | 0.0353 |
| FBgn0032705 | 780.171 | 10.993 | 0.077 | 0.0015 |
| FBgn0034105 | 22.809  | 3.958  | 0.343 | 0.1775 |
| FBgn0034240 | 639.608 | 16.344 | 0.209 | 0.0198 |
| FBgn0026394 | 19.543  | 3.722  | 0.354 | 0.1773 |
| FBgn0030303 | 15.906  | 3.124  | 0.307 | 0.1924 |
| FBgn0026374 | 11.246  | 3.260  | 0.472 | 0.4024 |
| FBgn0002478 | 109.202 | 3.610  | 0.060 | 0.0036 |
| FBgn0033652 | 37.562  | 6.518  | 0.566 | 0.3446 |
| FBgn0033317 | 35.495  | 5.114  | 0.368 | 0.1562 |
| FBgn0033195 | 791.240 | 29.255 | 0.541 | 0.2961 |
| FBgn0031090 | 16.066  | 2.654  | 0.219 | 0.1199 |
| FBgn0036787 | 51.457  | 7.355  | 0.526 | 0.2874 |
| FBgn0025832 | 797.933 | 7.974  | 0.040 | 0.0112 |
| FBgn0034546 | 762.654 | 14.680 | 0.141 | 0.0269 |
| FBgn0033876 | 141.949 | 8.289  | 0.242 | 0.0524 |
| FBgn0031902 | 668.791 | 20.311 | 0.308 | 0.0654 |
| FBgn0051460 | 25.836  | 2.794  | 0.151 | 0.0792 |
| FBgn0051160 | 29.091  | 2.210  | 0.084 | 0.0227 |
| FBgn0051361 | 5.561   | 1.909  | 0.328 | 0.3746 |
| FBgn0030440 | 35.957  | 4.793  | 0.319 | 0.0915 |
| FBgn0062412 | 10.944  | 2.904  | 0.385 | 0.2902 |
| FBgn0035673 | 27.297  | 7.169  | 0.941 | 0.9147 |
| FBgn0032719 | 111.600 | 6.436  | 0.186 | 0.0163 |
| FBgn0045843 | 6.033   | 2.153  | 0.384 | 0.4201 |
| FBgn0035430 | 94.303  | 13.085 | 0.908 | 0.8590 |
| FBgn0028486 | 52.506  | 6.073  | 0.351 | 0.1232 |
| FBgn0033871 | 756.990 | 12.337 | 0.101 | 0.0022 |
| FBgn0029942 | 31.848  | 3.938  | 0.243 | 0.0623 |
| FBgn0039215 | 912.272 | 6.911  | 0.026 | 0.0006 |
| FBgn0015221 | 20.686  | 2.617  | 0.166 | 0.1074 |
| FBgn0037634 | 30.861  | 2.739  | 0.122 | 0.0491 |
| FBgn0004132 | 23.095  | 2.673  | 0.155 | 0.0803 |
| FBgn0031229 | 775.306 | 10.559 | 0.072 | 0.0245 |
| FBgn0031999 | 8.426   | 3.615  | 0.775 | 0.7448 |
| FBgn0051390 | 13.858  | 3.423  | 0.423 | 0.3067 |
| FBgn0031051 | 13.803  | 2.416  | 0.211 | 0.1404 |
| FBgn0037341 | 44.123  | 6.167  | 0.431 | 0.1795 |
| FBgn0037446 | 11.080  | 2.799  | 0.354 | 0.3033 |
| FBgn0031682 | 704.613 | 15.171 | 0.163 | 0.0610 |
| FBgn0040929 | 21.218  | 3.881  | 0.355 | 0.1853 |
| FBgn0038473 | 24.439  | 2.098  | 0.090 | 0.0477 |
| FBgn0033069 | 759.163 | 13.975 | 0.129 | 0.0041 |
| FBgn0036460 | 827.570 | 11.230 | 0.076 | 0.0110 |
| FBgn0040212 | 33.765  | 4.267  | 0.270 | 0.0841 |



|             |         |        |       |        |
|-------------|---------|--------|-------|--------|
| FBgn0037336 | 884.447 | 17.645 | 0.176 | 0.0115 |
| FBgn0039013 | 29.234  | 3.702  | 0.234 | 0.0769 |
| FBgn0033572 | 14.123  | 4.079  | 0.589 | 0.4705 |
| FBgn0037312 | 17.315  | 2.449  | 0.173 | 0.0801 |
| FBgn0037976 | 14.365  | 3.267  | 0.372 | 0.2398 |
| FBgn0033777 | 695.788 | 8.837  | 0.056 | 0.0100 |
| FBgn0033913 | 782.180 | 10.451 | 0.070 | 0.0123 |
| FBgn0035997 | 747.435 | 14.753 | 0.146 | 0.0108 |
| FBgn0034770 | 12.539  | 1.752  | 0.122 | 0.1042 |
| FBgn0031866 | 18.994  | 3.715  | 0.363 | 0.1977 |
| FBgn0038940 | 679.403 | 16.086 | 0.190 | 0.0468 |
| FBgn0039702 | 632.194 | 16.177 | 0.207 | 0.0492 |
| FBgn0039742 | 730.581 | 16.901 | 0.195 | 0.0164 |
| FBgn0038391 | 127.657 | 8.180  | 0.262 | 0.0407 |
| FBgn0025608 | 15.495  | 3.102  | 0.310 | 0.2310 |
| FBgn0033725 | 37.927  | 4.289  | 0.243 | 0.0744 |
| FBgn0028530 | 45.252  | 4.508  | 0.224 | 0.0572 |
| FBgn0038588 | 22.299  | 1.490  | 0.050 | 0.0396 |
| FBgn0038633 | 32.128  | 3.587  | 0.200 | 0.0798 |
| FBgn0015763 | 23.576  | 1.891  | 0.076 | 0.0459 |
| FBgn0022349 | 762.008 | 15.900 | 0.166 | 0.0093 |
| FBgn0037632 | 761.883 | 12.145 | 0.097 | 0.0316 |
| FBgn0027929 | 14.668  | 2.568  | 0.225 | 0.1539 |
| FBgn0026388 | 17.568  | 2.049  | 0.119 | 0.0703 |
| FBgn0030833 | 19.191  | 3.316  | 0.286 | 0.1596 |
| FBgn0035849 | 12.315  | 3.701  | 0.556 | 0.4320 |
| FBgn0027554 | 55.616  | 4.211  | 0.159 | 0.0321 |
| FBgn0037906 | 727.660 | 18.290 | 0.230 | 0.0268 |
| FBgn0033609 | 15.248  | 2.385  | 0.187 | 0.1438 |
| FBgn0035031 | 17.419  | 3.855  | 0.426 | 0.2793 |
| FBgn0016940 | 35.282  | 5.008  | 0.355 | 0.1308 |
| FBgn0031347 | 26.555  | 4.347  | 0.356 | 0.1758 |
| FBgn0026315 | 16.129  | 3.282  | 0.334 | 0.2450 |
| FBgn0011740 | 569.564 | 16.587 | 0.242 | 0.0470 |
| FBgn0051119 | 15.519  | 5.288  | 0.901 | 0.8647 |
| FBgn0032694 | 822.209 | 16.401 | 0.164 | 0.0093 |
| FBgn0037882 | 694.007 | 18.476 | 0.246 | 0.0573 |
| FBgn0026438 | 22.678  | 2.536  | 0.142 | 0.0586 |
| FBgn0036662 | 925.657 | 3.543  | 0.007 | 0.0008 |
| FBgn0003732 | 772.447 | 21.192 | 0.291 | 0.0549 |
| FBgn0004380 | 92.369  | 3.807  | 0.078 | 0.0047 |
| FBgn0028688 | 17.091  | 2.772  | 0.225 | 0.1501 |
| FBgn0001079 | 774.196 | 16.866 | 0.184 | 0.0165 |
| FBgn0024939 | 29.905  | 4.171  | 0.291 | 0.1028 |
| FBgn0051741 | 54.433  | 5.289  | 0.257 | 0.0585 |
| FBgn0033113 | 26.362  | 3.784  | 0.272 | 0.1185 |
| FBgn0035600 | 755.991 | 17.465 | 0.202 | 0.0579 |
| FBgn0034000 | 18.230  | 3.555  | 0.347 | 0.1664 |
| FBgn0052944 | 254.438 | 10.401 | 0.213 | 0.0297 |
| FBgn0034460 | 30.569  | 4.557  | 0.340 | 0.1217 |
| FBgn0032369 | 26.311  | 5.610  | 0.598 | 0.4068 |
| FBgn0034656 | 709.509 | 20.197 | 0.287 | 0.0647 |
| FBgn0035432 | 741.940 | 10.633 | 0.076 | 0.0123 |
| FBgn0030057 | 56.129  | 7.414  | 0.490 | 0.2699 |

|             |         |        |       |        |
|-------------|---------|--------|-------|--------|
| FBgn0028543 | 36.499  | 3.553  | 0.173 | 0.0529 |
| FBgn0033170 | 3.720   | 1.189  | 0.190 | 0.2959 |
| FBgn0037902 | 776.275 | 11.428 | 0.084 | 0.0064 |
| FBgn0029664 | 21.440  | 2.143  | 0.107 | 0.0657 |
| FBgn0039252 | 703.594 | 14.340 | 0.146 | 0.0303 |
| FBgn0051108 | 5.583   | 1.074  | 0.103 | 0.1657 |
| FBgn0039581 | 729.731 | 17.969 | 0.221 | 0.0252 |
| FBgn0036428 | 13.716  | 2.248  | 0.184 | 0.1579 |
| FBgn0052418 | 60.979  | 6.012  | 0.296 | 0.0716 |
| FBgn0036726 | 12.770  | 1.672  | 0.110 | 0.1047 |
| FBgn0002732 | 746.688 | 24.253 | 0.394 | 0.1313 |
| FBgn0032799 | 638.301 | 22.878 | 0.410 | 0.1649 |
| FBgn0035928 | 42.111  | 5.327  | 0.337 | 0.1101 |
| FBgn0039225 | 14.423  | 5.143  | 0.917 | 0.8858 |
| FBgn0001227 | 15.971  | 3.582  | 0.402 | 0.2528 |
| FBgn0031774 | 14.091  | 1.291  | 0.059 | 0.0558 |
| FBgn0031659 | 16.643  | 3.609  | 0.391 | 0.2307 |
| FBgn0032205 | 17.942  | 2.724  | 0.207 | 0.1370 |
| FBgn0034877 | 408.560 | 6.871  | 0.058 | 0.0075 |
| FBgn0015399 | 832.512 | 17.605 | 0.186 | 0.0137 |
| FBgn0003435 | 587.408 | 22.337 | 0.425 | 0.1604 |
| FBgn0031239 | 842.833 | 15.695 | 0.146 | 0.0100 |
| FBgn0035204 | 749.908 | 19.751 | 0.260 | 0.0393 |
| FBgn0036891 | 38.842  | 4.536  | 0.265 | 0.0617 |
| FBgn0035436 | 779.592 | 14.099 | 0.127 | 0.0146 |
| FBgn0014396 | 67.539  | 4.691  | 0.163 | 0.0431 |
| FBgn0039249 | 842.036 | 11.600 | 0.080 | 0.0051 |
| FBgn0028480 | 18.535  | 3.563  | 0.342 | 0.2124 |
| FBgn0038494 | 689.273 | 13.693 | 0.136 | 0.0071 |
| FBgn0039229 | 824.002 | 14.441 | 0.127 | 0.0041 |
| FBgn0027086 | 19.625  | 1.328  | 0.045 | 0.0408 |
| FBgn0035851 | 629.797 | 19.742 | 0.309 | 0.0660 |
| FBgn0039661 | 706.569 | 11.739 | 0.098 | 0.0097 |
| FBgn0051798 | 42.436  | 6.196  | 0.452 | 0.2140 |
| FBgn0037911 | 35.349  | 3.180  | 0.143 | 0.0326 |
| FBgn0004781 | 668.587 | 26.890 | 0.541 | 0.2975 |
| FBgn0051678 | 855.230 | 8.346  | 0.041 | 0.0013 |
| FBgn0031434 | 621.074 | 25.159 | 0.510 | 0.3256 |
| FBgn0001138 | 767.735 | 11.323 | 0.084 | 0.0012 |
| FBgn0035300 | 871.226 | 14.979 | 0.129 | 0.0041 |
| FBgn0031420 | 700.156 | 24.880 | 0.442 | 0.1746 |
| FBgn0038810 | 18.570  | 2.646  | 0.189 | 0.0902 |
| FBgn0031930 | 860.987 | 11.370 | 0.075 | 0.0046 |
| FBgn0037233 | 761.836 | 21.008 | 0.290 | 0.0681 |
| FBgn0034072 | 171.591 | 5.286  | 0.081 | 0.0047 |
| FBgn0033562 | 763.698 | 10.832 | 0.077 | 0.0191 |
| FBgn0051249 | 715.202 | 18.363 | 0.236 | 0.0319 |
| FBgn0038300 | 8.797   | 2.110  | 0.253 | 0.2638 |
| FBgn0033755 | 175.711 | 8.981  | 0.230 | 0.0287 |
| FBgn0037778 | 713.666 | 14.172 | 0.141 | 0.0057 |
| FBgn0033187 | 19.611  | 2.535  | 0.164 | 0.1058 |
| FBgn0038437 | 27.985  | 4.646  | 0.386 | 0.1570 |
| FBgn0031756 | 645.358 | 24.269 | 0.456 | 0.2103 |
| FBgn0005355 | 69.211  | 4.528  | 0.148 | 0.0185 |

|             |         |        |       |        |
|-------------|---------|--------|-------|--------|
| FBgn0030457 | 20.154  | 2.968  | 0.219 | 0.1020 |
| FBgn0034853 | 10.211  | 4.242  | 0.881 | 0.8550 |
| FBgn0032810 | 99.630  | 4.385  | 0.097 | 0.0040 |
| FBgn0003346 | 31.335  | 3.238  | 0.167 | 0.0513 |
| FBgn0030177 | 112.721 | 4.571  | 0.093 | 0.0035 |
| FBgn0032602 | 174.497 | 11.799 | 0.399 | 0.1546 |
| FBgn0038056 | 36.924  | 2.229  | 0.067 | 0.0194 |
| FBgn0030518 | 752.288 | 7.365  | 0.036 | 0.0031 |
| FBgn0036019 | 25.924  | 4.914  | 0.466 | 0.2544 |
| FBgn0038542 | 4.628   | 2.649  | 0.758 | 0.7848 |
| FBgn0038431 | 820.970 | 16.599 | 0.168 | 0.0098 |
| FBgn0031267 | 736.353 | 17.001 | 0.196 | 0.0561 |
| FBgn0037581 | 12.039  | 1.858  | 0.143 | 0.1434 |
| FBgn0037435 | 12.184  | 2.458  | 0.248 | 0.1919 |
| FBgn0029768 | 737.746 | 22.085 | 0.331 | 0.0801 |
| FBgn0005638 | 14.586  | 2.265  | 0.176 | 0.1044 |
| FBgn0038500 | 7.702   | 2.700  | 0.473 | 0.4589 |
| FBgn0031747 | 40.304  | 3.906  | 0.189 | 0.0341 |
| FBgn0041789 | 12.651  | 2.213  | 0.194 | 0.1685 |
| FBgn0011300 | 19.828  | 2.717  | 0.186 | 0.0987 |
| FBgn0038964 | 827.396 | 10.198 | 0.063 | 0.0024 |
| FBgn0027568 | 18.368  | 1.579  | 0.068 | 0.0541 |
| FBgn0030669 | 20.467  | 2.831  | 0.196 | 0.0889 |
| FBgn0052594 | 27.661  | 4.744  | 0.407 | 0.1891 |
| FBgn0038581 | 16.632  | 1.860  | 0.104 | 0.0908 |
| FBgn0051007 | 18.164  | 2.693  | 0.200 | 0.1099 |
| FBgn0037405 | 25.203  | 3.801  | 0.287 | 0.1250 |
| FBgn0029771 | 14.266  | 3.645  | 0.466 | 0.3664 |
| FBgn0037443 | 29.052  | 3.273  | 0.184 | 0.0626 |
| FBgn0031918 | 777.487 | 19.550 | 0.246 | 0.0381 |
| FBgn0024332 | 20.958  | 3.161  | 0.238 | 0.0939 |
| FBgn0031987 | 23.624  | 2.884  | 0.176 | 0.0891 |
| FBgn0000227 | 19.100  | 3.523  | 0.325 | 0.1895 |
| FBgn0034585 | 14.402  | 1.715  | 0.102 | 0.0830 |
| FBgn0010110 | 787.239 | 16.355 | 0.170 | 0.0102 |
| FBgn0011272 | 23.093  | 3.948  | 0.338 | 0.1670 |
| FBgn0037363 | 50.376  | 4.128  | 0.169 | 0.0408 |
| FBgn0039776 | 779.915 | 19.220 | 0.237 | 0.0292 |
| FBgn0029936 | 35.599  | 2.934  | 0.121 | 0.0370 |
| FBgn0004915 | 24.225  | 3.453  | 0.246 | 0.1117 |
| FBgn0039937 | 737.464 | 18.853 | 0.241 | 0.0368 |
| FBgn0029738 | 837.823 | 16.966 | 0.172 | 0.0106 |
| FBgn0002734 | 17.824  | 4.213  | 0.498 | 0.3239 |
| FBgn0029928 | 18.988  | 4.357  | 0.500 | 0.3051 |
| FBgn0031781 | 10.344  | 1.454  | 0.102 | 0.0995 |
| FBgn0019940 | 14.990  | 3.182  | 0.338 | 0.1918 |
| FBgn0011787 | 19.240  | 3.362  | 0.294 | 0.1386 |
| FBgn0035173 | 777.899 | 16.756 | 0.180 | 0.0175 |
| FBgn0036187 | 40.196  | 2.339  | 0.068 | 0.0145 |
| FBgn0029818 | 690.556 | 18.734 | 0.254 | 0.0729 |
| FBgn0014930 | 751.949 | 14.391 | 0.138 | 0.0141 |
| FBgn0038452 | 38.086  | 3.641  | 0.174 | 0.0402 |
| FBgn0038170 | 20.132  | 3.517  | 0.307 | 0.1706 |
| FBgn0035704 | 182.918 | 6.055  | 0.100 | 0.0025 |

|             |         |        |       |        |
|-------------|---------|--------|-------|--------|
| FBgn0037231 | 21.644  | 2.321  | 0.124 | 0.0595 |
| FBgn0039054 | 752.353 | 17.354 | 0.200 | 0.0176 |
| FBgn0050051 | 14.968  | 3.788  | 0.479 | 0.3588 |
| FBgn0030792 | 5.845   | 2.252  | 0.434 | 0.4816 |
| FBgn0003963 | 8.390   | 2.854  | 0.485 | 0.4416 |
| FBgn0021967 | 42.727  | 6.294  | 0.464 | 0.2208 |
| FBgn0027376 | 23.226  | 4.174  | 0.375 | 0.1791 |
| FBgn0033942 | 12.031  | 3.325  | 0.459 | 0.3679 |
| FBgn0036271 | 25.542  | 3.663  | 0.263 | 0.1270 |
| FBgn0035194 | 20.948  | 4.790  | 0.548 | 0.3629 |
| FBgn0033178 | 24.329  | 2.370  | 0.115 | 0.0565 |
| FBgn0035409 | 756.053 | 26.194 | 0.454 | 0.1911 |
| FBgn0030887 | 20.790  | 1.859  | 0.083 | 0.0526 |
| FBgn0038847 | 11.371  | 2.530  | 0.281 | 0.2177 |
| FBgn0024833 | 17.656  | 3.112  | 0.274 | 0.1593 |
| FBgn0014906 | 8.830   | 1.900  | 0.204 | 0.2285 |
| FBgn0053052 | 675.634 | 13.839 | 0.142 | 0.0135 |
| FBgn0010709 | 915.781 | 4.563  | 0.011 | 0.0021 |
| FBgn0031288 | 23.283  | 7.955  | 1.359 | 0.5781 |
| FBgn0030763 | 20.672  | 5.436  | 0.715 | 0.5887 |
| FBgn0052255 | 36.913  | 2.605  | 0.092 | 0.0276 |
| FBgn0033999 | 8.163   | 2.453  | 0.369 | 0.3833 |
| FBgn0050280 | 15.916  | 4.564  | 0.654 | 0.5120 |
| FBgn0069913 | 112.086 | 6.762  | 0.204 | 0.0228 |
| FBgn0016131 | 4.800   | 2.380  | 0.590 | 0.6416 |
| FBgn0019938 | 827.183 | 16.422 | 0.163 | 0.0098 |
| FBgn0034276 | 777.516 | 9.638  | 0.060 | 0.0004 |
| FBgn0037070 | 603.174 | 19.591 | 0.318 | 0.0716 |
| FBgn0032627 | 23.754  | 3.526  | 0.262 | 0.1275 |
| FBgn0035254 | 88.731  | 14.622 | 1.205 | 0.7201 |
| FBgn0037252 | 774.596 | 13.426 | 0.116 | 0.0029 |
| FBgn0044324 | 20.155  | 2.337  | 0.136 | 0.0793 |
| FBgn0050195 | 6.588   | 2.713  | 0.559 | 0.5752 |
| FBgn0033450 | 38.247  | 3.535  | 0.163 | 0.0643 |
| FBgn0033948 | 36.061  | 3.181  | 0.140 | 0.0365 |
| FBgn0036451 | 9.166   | 2.053  | 0.230 | 0.2098 |
| FBgn0052022 | 62.680  | 5.159  | 0.212 | 0.0434 |
| FBgn0000018 | 41.892  | 6.309  | 0.475 | 0.2419 |
| FBgn0036144 | 13.714  | 1.896  | 0.131 | 0.1073 |
| FBgn0032167 | 23.876  | 2.135  | 0.095 | 0.0603 |
| FBgn0036978 | 25.054  | 6.021  | 0.723 | 0.6034 |
| FBgn0067629 | 692.461 | 21.127 | 0.322 | 0.0770 |
| FBgn0036152 | 791.683 | 19.022 | 0.229 | 0.0263 |
| FBgn0039647 | 44.209  | 2.636  | 0.079 | 0.0163 |
| FBgn0015933 | 727.042 | 10.779 | 0.080 | 0.0025 |
| FBgn0034165 | 113.158 | 10.542 | 0.491 | 0.2360 |
| FBgn0034703 | 792.722 | 9.200  | 0.053 | 0.0228 |
| FBgn0033182 | 711.745 | 14.697 | 0.152 | 0.0071 |
| FBgn0027657 | 599.624 | 24.286 | 0.492 | 0.2624 |
| FBgn0035792 | 13.062  | 3.314  | 0.420 | 0.3056 |
| FBgn0031886 | 72.892  | 5.232  | 0.188 | 0.0350 |
| FBgn0002561 | 14.197  | 5.397  | 1.026 | 0.9652 |
| FBgn0034560 | 6.879   | 2.317  | 0.390 | 0.4050 |
| FBgn0038145 | 719.953 | 16.657 | 0.193 | 0.0449 |

|             |         |        |       |        |
|-------------|---------|--------|-------|--------|
| FBgn0037408 | 51.485  | 2.460  | 0.059 | 0.0178 |
| FBgn0036321 | 688.333 | 16.228 | 0.191 | 0.0562 |
| FBgn0030787 | 66.799  | 3.538  | 0.094 | 0.0198 |
| FBgn0030645 | 731.353 | 24.138 | 0.398 | 0.1350 |
| FBgn0037369 | 26.467  | 4.390  | 0.364 | 0.1675 |
| FBgn0031601 | 715.664 | 15.180 | 0.161 | 0.0555 |
| FBgn0038192 | 18.105  | 4.265  | 0.502 | 0.3422 |
| FBgn0035558 | 730.288 | 21.484 | 0.316 | 0.0701 |
| FBgn0035701 | 111.444 | 6.739  | 0.204 | 0.0190 |
| FBgn0036173 | 657.836 | 22.581 | 0.388 | 0.1255 |
| FBgn0029529 | 7.991   | 3.056  | 0.584 | 0.5516 |
| FBgn0038049 | 9.923   | 1.238  | 0.077 | 0.1072 |
| FBgn0033855 | 28.690  | 3.538  | 0.218 | 0.0670 |
| FBgn0033468 | 26.141  | 4.245  | 0.345 | 0.1712 |
| FBgn0038943 | 775.487 | 15.014 | 0.145 | 0.0075 |
| FBgn0036341 | 20.034  | 3.182  | 0.253 | 0.1126 |
| FBgn0039765 | 29.202  | 5.773  | 0.571 | 0.3769 |
| FBgn0051550 | 20.343  | 2.202  | 0.119 | 0.0684 |
| FBgn0028892 | 20.383  | 2.930  | 0.211 | 0.1312 |
| FBgn0030668 | 762.244 | 15.469 | 0.157 | 0.0085 |
| FBgn0023540 | 32.400  | 5.190  | 0.416 | 0.1994 |
| FBgn0002593 | 4.322   | 1.967  | 0.448 | 0.5207 |
| FBgn0035007 | 88.148  | 3.208  | 0.058 | 0.0056 |
| FBgn0028915 | 37.466  | 4.292  | 0.246 | 0.0862 |
| FBgn0031673 | 17.947  | 2.555  | 0.182 | 0.0969 |
| FBgn0037547 | 83.991  | 6.924  | 0.285 | 0.0551 |
| FBgn0036729 | 39.881  | 3.800  | 0.181 | 0.0539 |
| FBgn0001341 | 750.771 | 13.610 | 0.123 | 0.0213 |
| FBgn0037277 | 24.839  | 2.116  | 0.090 | 0.0527 |
| FBgn0033667 | 23.593  | 4.253  | 0.383 | 0.1774 |
| FBgn0034179 | 21.953  | 3.360  | 0.257 | 0.1346 |
| FBgn0035248 | 32.773  | 4.216  | 0.271 | 0.1105 |
| FBgn0037323 | 10.726  | 2.929  | 0.400 | 0.3275 |
| FBgn0032149 | 935.676 | 11.871 | 0.075 | 0.0006 |
| FBgn0029701 | 629.876 | 31.518 | 0.789 | 0.6674 |
| FBgn0027835 | 678.546 | 11.351 | 0.095 | 0.0106 |
| FBgn0038000 | 824.923 | 18.350 | 0.204 | 0.0184 |
| FBgn0051778 | 721.328 | 33.332 | 0.770 | 0.6383 |
| FBgn0036104 | 768.973 | 14.700 | 0.141 | 0.0243 |
| FBgn0035854 | 732.227 | 23.742 | 0.385 | 0.1229 |
| FBgn0039218 | 817.533 | 17.870 | 0.195 | 0.0160 |
| FBgn0016762 | 21.667  | 1.915  | 0.085 | 0.0612 |
| FBgn0033716 | 31.005  | 3.279  | 0.173 | 0.0717 |
| FBgn0036804 | 523.606 | 15.617 | 0.233 | 0.0333 |
| FBgn0027581 | 820.525 | 16.304 | 0.162 | 0.0085 |
| FBgn0039404 | 638.197 | 14.397 | 0.162 | 0.0117 |
| FBgn0033072 | 19.478  | 3.056  | 0.240 | 0.1185 |
| FBgn0030449 | 205.988 | 12.336 | 0.369 | 0.1315 |
| FBgn0051453 | 730.657 | 18.526 | 0.235 | 0.0759 |
| FBgn0010382 | 31.719  | 3.474  | 0.190 | 0.0641 |
| FBgn0033712 | 12.494  | 2.030  | 0.165 | 0.1555 |
| FBgn0032447 | 32.861  | 3.837  | 0.224 | 0.0698 |
| FBgn0015567 | 51.644  | 4.378  | 0.186 | 0.0301 |
| FBgn0033943 | 18.431  | 3.944  | 0.422 | 0.2348 |

|             |         |        |       |        |
|-------------|---------|--------|-------|--------|
| FBgn0029895 | 746.435 | 24.448 | 0.400 | 0.1368 |
| FBgn0042180 | 40.038  | 2.697  | 0.091 | 0.0307 |
| FBgn0039020 | 11.092  | 3.078  | 0.427 | 0.3842 |
| FBgn0003944 | 31.968  | 7.717  | 0.931 | 0.9005 |
| FBgn0037890 | 5.974   | 1.769  | 0.262 | 0.3024 |
| FBgn0036772 | 12.880  | 3.068  | 0.365 | 0.2605 |
| FBgn0038139 | 39.230  | 4.179  | 0.223 | 0.0665 |
| FBgn0032180 | 21.680  | 5.931  | 0.811 | 0.7264 |
| FBgn0032259 | 45.727  | 2.561  | 0.072 | 0.0157 |
| FBgn0039805 | 33.341  | 7.570  | 0.859 | 0.7879 |
| FBgn0024187 | 761.267 | 15.112 | 0.150 | 0.0068 |
| FBgn0036121 | 10.468  | 2.343  | 0.262 | 0.2109 |
| FBgn0032911 | 53.125  | 2.854  | 0.077 | 0.0206 |
| FBgn0015477 | 821.769 | 12.172 | 0.090 | 0.0050 |
| FBgn0038590 | 98.813  | 5.716  | 0.165 | 0.0206 |
| FBgn0036980 | 22.172  | 3.235  | 0.236 | 0.1202 |
| FBgn0004378 | 18.586  | 3.017  | 0.245 | 0.1269 |
| FBgn0039565 | 812.691 | 15.424 | 0.146 | 0.0088 |
| FBgn0033355 | 30.556  | 2.563  | 0.107 | 0.0410 |
| FBgn0035621 | 242.892 | 8.308  | 0.142 | 0.0084 |
| FBgn0033984 | 29.174  | 3.747  | 0.241 | 0.1167 |
| FBgn0031970 | 41.148  | 4.050  | 0.199 | 0.0614 |
| FBgn0035534 | 6.960   | 1.470  | 0.155 | 0.2058 |
| FBgn0036862 | 47.860  | 5.958  | 0.371 | 0.1206 |
| FBgn0032987 | 8.911   | 2.462  | 0.340 | 0.2946 |
| FBgn0031253 | 13.411  | 2.356  | 0.207 | 0.1845 |
| FBgn0001197 | 734.494 | 11.539 | 0.091 | 0.0016 |
| FBgn0029947 | 17.411  | 1.498  | 0.064 | 0.0624 |
| FBgn0031630 | 88.619  | 7.363  | 0.306 | 0.1004 |
| FBgn0033418 | 31.085  | 4.763  | 0.365 | 0.1685 |
| FBgn0011556 | 98.717  | 9.268  | 0.435 | 0.1733 |
| FBgn0037279 | 760.813 | 13.101 | 0.113 | 0.0050 |
| FBgn0039540 | 738.504 | 16.676 | 0.188 | 0.0272 |
| FBgn0040705 | 7.644   | 3.880  | 0.985 | 0.9839 |
| FBgn0051304 | 18.977  | 4.253  | 0.477 | 0.3155 |
| FBgn0030376 | 32.518  | 4.976  | 0.381 | 0.1807 |
| FBgn0033739 | 34.265  | 2.036  | 0.061 | 0.0224 |
| FBgn0028693 | 62.109  | 4.705  | 0.178 | 0.0185 |
| FBgn0037134 | 707.877 | 17.156 | 0.208 | 0.0195 |
| FBgn0039759 | 619.956 | 17.774 | 0.255 | 0.0519 |
| FBgn0003984 | 637.031 | 21.053 | 0.348 | 0.0926 |
| FBgn0033851 | 12.539  | 6.431  | 1.649 | 0.3582 |
| FBgn0031544 | 37.109  | 2.437  | 0.080 | 0.0183 |
| FBgn0031321 | 28.793  | 3.826  | 0.254 | 0.0800 |
| FBgn0035445 | 56.668  | 3.941  | 0.137 | 0.0261 |
| FBgn0036487 | 735.536 | 8.874  | 0.054 | 0.0050 |
| FBgn0037410 | 6.560   | 1.837  | 0.257 | 0.3014 |
| FBgn0002632 | 736.703 | 20.468 | 0.284 | 0.0580 |
| FBgn0015904 | 677.808 | 12.092 | 0.108 | 0.0062 |
| FBgn0033482 | 773.416 | 20.841 | 0.281 | 0.1053 |
| FBgn0050076 | 22.788  | 5.833  | 0.746 | 0.6246 |
| FBgn0000037 | 157.741 | 7.840  | 0.195 | 0.0281 |
| FBgn0028990 | 727.734 | 15.346 | 0.162 | 0.0124 |
| FBgn0029687 | 22.120  | 2.828  | 0.181 | 0.0987 |

|             |         |        |       |        |
|-------------|---------|--------|-------|--------|
| FBgn0038285 | 226.626 | 15.731 | 0.546 | 0.3036 |
| FBgn0052393 | 18.333  | 5.071  | 0.701 | 0.5772 |
| FBgn0031360 | 18.691  | 3.535  | 0.334 | 0.1942 |
| FBgn0033882 | 789.252 | 12.957 | 0.106 | 0.0067 |
| FBgn0035729 | 20.795  | 2.531  | 0.154 | 0.0851 |
| FBgn0039246 | 14.205  | 3.027  | 0.323 | 0.2413 |
| FBgn0030345 | 723.451 | 9.225  | 0.059 | 0.0113 |
| FBgn0034214 | 812.419 | 10.226 | 0.064 | 0.0125 |
| FBgn0052030 | 816.073 | 21.294 | 0.278 | 0.0479 |
| FBgn0034663 | 29.563  | 6.838  | 0.791 | 0.6824 |
| FBgn0036292 | 56.305  | 3.654  | 0.119 | 0.0129 |
| FBgn0030928 | 59.676  | 8.738  | 0.640 | 0.4406 |
| FBgn0034422 | 616.270 | 16.468 | 0.220 | 0.0582 |
| FBgn0028520 | 959.673 | 6.020  | 0.019 | 0.0002 |
| FBgn0032873 | 5.679   | 1.011  | 0.090 | 0.1604 |
| FBgn0030009 | 17.666  | 6.319  | 1.130 | 0.8262 |
| FBgn0038319 | 44.080  | 4.584  | 0.238 | 0.0701 |
| FBgn0001148 | 26.723  | 3.000  | 0.168 | 0.0468 |
| FBgn0033495 | 18.934  | 2.357  | 0.147 | 0.0956 |
| FBgn0039596 | 10.896  | 1.773  | 0.144 | 0.1253 |
| FBgn0029711 | 752.213 | 19.739 | 0.259 | 0.0465 |
| FBgn0031309 | 820.959 | 21.272 | 0.276 | 0.0469 |
| FBgn0038246 | 666.946 | 18.262 | 0.250 | 0.0347 |
| FBgn0040985 | 24.476  | 2.519  | 0.130 | 0.0628 |
| FBgn0038389 | 23.219  | 4.268  | 0.392 | 0.1831 |
| FBgn0031945 | 745.490 | 18.729 | 0.235 | 0.0355 |
| FBgn0035520 | 18.234  | 3.055  | 0.256 | 0.1215 |
| FBgn0032376 | 577.435 | 13.601 | 0.160 | 0.0378 |
| FBgn0051392 | 20.079  | 3.566  | 0.317 | 0.1603 |
| FBgn0036713 | 21.493  | 4.161  | 0.403 | 0.2115 |
| FBgn0025739 | 11.432  | 1.694  | 0.126 | 0.1391 |
| FBgn0029123 | 793.024 | 16.523 | 0.172 | 0.0180 |
| FBgn0037721 | 762.547 | 18.121 | 0.215 | 0.0279 |
| FBgn0027539 | 111.985 | 5.166  | 0.119 | 0.0063 |
| FBgn0034729 | 22.755  | 2.654  | 0.155 | 0.0910 |
| FBgn0034552 | 13.532  | 2.493  | 0.230 | 0.1600 |
| FBgn0027521 | 52.739  | 6.131  | 0.356 | 0.1348 |
| FBgn0031883 | 31.262  | 2.492  | 0.099 | 0.0245 |
| FBgn0051908 | 713.786 | 21.543 | 0.325 | 0.0745 |
| FBgn0033717 | 23.872  | 1.842  | 0.071 | 0.0385 |
| FBgn0040346 | 14.670  | 4.541  | 0.703 | 0.5890 |
| FBgn0036294 | 519.622 | 17.293 | 0.288 | 0.0792 |
| FBgn0034600 | 9.007   | 2.114  | 0.248 | 0.2326 |
| FBgn0000316 | 19.800  | 2.736  | 0.189 | 0.0981 |
| FBgn0038402 | 22.444  | 3.430  | 0.262 | 0.1127 |
| FBgn0019886 | 586.094 | 12.109 | 0.125 | 0.0156 |
| FBgn0031376 | 817.820 | 8.588  | 0.045 | 0.0012 |
| FBgn0039358 | 222.514 | 11.335 | 0.289 | 0.0734 |
| FBgn0028373 | 701.586 | 26.060 | 0.484 | 0.2994 |
| FBgn0022027 | 15.498  | 4.581  | 0.677 | 0.5439 |
| FBgn0031734 | 744.244 | 16.609 | 0.185 | 0.0151 |
| FBgn0039158 | 10.377  | 1.363  | 0.090 | 0.1263 |
| FBgn0029887 | 66.198  | 3.623  | 0.099 | 0.0106 |
| FBgn0039486 | 35.713  | 3.449  | 0.167 | 0.0431 |

|             |         |        |       |        |
|-------------|---------|--------|-------|--------|
| FBgn0030107 | 28.771  | 5.993  | 0.624 | 0.4370 |
| FBgn0033665 | 26.752  | 3.251  | 0.197 | 0.0710 |
| FBgn0038353 | 673.872 | 22.559 | 0.378 | 0.1169 |
| FBgn0034530 | 58.265  | 5.085  | 0.222 | 0.0462 |
| FBgn0032138 | 845.828 | 15.118 | 0.135 | 0.0048 |
| FBgn0029822 | 174.462 | 18.327 | 0.963 | 0.9437 |
| FBgn0032266 | 793.096 | 22.330 | 0.314 | 0.0693 |
| FBgn0035293 | 88.007  | 5.192  | 0.153 | 0.0309 |
| FBgn0037176 | 17.532  | 6.043  | 1.041 | 0.9440 |
| FBgn0039632 | 607.030 | 13.755 | 0.156 | 0.0179 |
| FBgn0037184 | 44.452  | 6.653  | 0.498 | 0.2747 |
| FBgn0010288 | 26.028  | 2.480  | 0.118 | 0.0491 |
| FBgn0027791 | 631.220 | 10.595 | 0.089 | 0.0059 |
| FBgn0037843 | 21.428  | 3.635  | 0.308 | 0.1363 |
| FBgn0022708 | 4.709   | 2.190  | 0.509 | 0.5639 |
| FBgn0030507 | 13.363  | 2.178  | 0.177 | 0.1585 |
| FBgn0029935 | 28.408  | 3.726  | 0.244 | 0.0779 |
| FBgn0033457 | 23.713  | 1.773  | 0.066 | 0.0319 |
| FBgn0051121 | 628.779 | 16.841 | 0.226 | 0.0273 |
| FBgn0003444 | 26.872  | 3.735  | 0.260 | 0.0934 |
| FBgn0003410 | 865.495 | 15.055 | 0.131 | 0.0046 |
| FBgn0031235 | 38.965  | 5.616  | 0.405 | 0.1645 |
| FBgn0027587 | 789.105 | 17.259 | 0.189 | 0.0144 |
| FBgn0030347 | 57.894  | 3.933  | 0.134 | 0.0240 |
| FBgn0038619 | 623.704 | 14.460 | 0.168 | 0.0388 |
| FBgn0036334 | 20.268  | 4.116  | 0.418 | 0.2183 |
| FBgn0037609 | 28.412  | 4.659  | 0.382 | 0.1865 |
| FBgn0031703 | 8.786   | 1.872  | 0.199 | 0.2069 |
| FBgn0037654 | 682.001 | 19.698 | 0.284 | 0.0515 |
| FBgn0025186 | 734.144 | 17.279 | 0.203 | 0.0182 |
| FBgn0038821 | 92.429  | 8.711  | 0.410 | 0.1494 |
| FBgn0003430 | 706.520 | 27.541 | 0.537 | 0.2910 |
| FBgn0053169 | 489.105 | 35.318 | 1.275 | 0.6372 |
| FBgn0051469 | 21.233  | 6.690  | 1.054 | 0.9239 |
| FBgn0034278 | 847.255 | 14.361 | 0.122 | 0.0034 |
| FBgn0039914 | 30.851  | 6.748  | 0.738 | 0.6104 |
| FBgn0013325 | 11.524  | 2.064  | 0.185 | 0.1813 |
| FBgn0040600 | 21.185  | 3.975  | 0.373 | 0.1771 |
| FBgn0036416 | 36.708  | 5.808  | 0.459 | 0.2339 |
| FBgn0032919 | 131.490 | 7.803  | 0.232 | 0.0300 |
| FBgn0029932 | 38.457  | 5.138  | 0.343 | 0.1548 |
| FBgn0032154 | 710.188 | 17.742 | 0.222 | 0.0240 |
| FBgn0034778 | 13.140  | 1.842  | 0.129 | 0.1257 |
| FBgn0029977 | 17.652  | 5.218  | 0.771 | 0.6788 |
| FBgn0036464 | 126.602 | 9.669  | 0.369 | 0.1330 |
| FBgn0032607 | 18.593  | 4.151  | 0.463 | 0.2685 |
| FBgn0038035 | 796.168 | 20.510 | 0.264 | 0.0412 |
| FBgn0000052 | 22.465  | 1.152  | 0.030 | 0.0281 |
| FBgn0036643 | 20.096  | 1.936  | 0.093 | 0.0600 |
| FBgn0000351 | 18.958  | 3.424  | 0.309 | 0.1982 |
| FBgn0034693 | 16.681  | 2.851  | 0.244 | 0.1849 |
| FBgn0005411 | 32.136  | 3.016  | 0.142 | 0.0497 |
| FBgn0033322 | 741.203 | 32.489 | 0.712 | 0.5483 |
| FBgn0004926 | 26.519  | 1.873  | 0.066 | 0.0215 |



|             |         |        |       |        |
|-------------|---------|--------|-------|--------|
| FBgn0025617 | 669.375 | 19.388 | 0.281 | 0.0578 |
| FBgn0030878 | 613.654 | 15.226 | 0.189 | 0.0192 |
| FBgn0032096 | 85.004  | 5.159  | 0.157 | 0.0506 |
| FBgn0053107 | 12.094  | 2.809  | 0.326 | 0.2537 |
| FBgn0033702 | 708.440 | 16.017 | 0.181 | 0.0581 |
| FBgn0035211 | 27.937  | 2.911  | 0.152 | 0.0709 |
| FBgn0032013 | 26.815  | 3.158  | 0.186 | 0.0910 |
| FBgn0028642 | 672.275 | 19.408 | 0.280 | 0.0969 |
| FBgn0032640 | 728.936 | 16.085 | 0.177 | 0.0141 |
| FBgn0037913 | 719.561 | 12.454 | 0.108 | 0.0337 |
| FBgn0000636 | 76.219  | 6.499  | 0.277 | 0.0588 |
| FBgn0032943 | 814.613 | 8.884  | 0.048 | 0.0061 |
| FBgn0010222 | 686.136 | 12.941 | 0.122 | 0.0095 |
| FBgn0038385 | 724.879 | 18.906 | 0.247 | 0.0334 |
| FBgn0032117 | 17.094  | 1.485  | 0.065 | 0.0546 |
| FBgn0010329 | 695.691 | 19.846 | 0.283 | 0.0507 |
| FBgn0029506 | 812.224 | 9.895  | 0.060 | 0.0037 |
| FBgn0051025 | 17.414  | 2.286  | 0.150 | 0.1043 |
| FBgn0013432 | 138.042 | 6.934  | 0.174 | 0.0139 |
| FBgn0039196 | 22.671  | 4.964  | 0.544 | 0.3387 |
| FBgn0015522 | 42.645  | 4.763  | 0.266 | 0.1003 |
| FBgn0031775 | 673.109 | 14.646 | 0.159 | 0.0278 |
| FBgn0016641 | 16.978  | 3.113  | 0.285 | 0.1683 |
| FBgn0032140 | 7.852   | 2.341  | 0.349 | 0.3555 |
| FBgn0002284 | 58.502  | 2.680  | 0.061 | 0.0164 |
| FBgn0036362 | 27.949  | 3.552  | 0.226 | 0.0614 |
| FBgn0030499 | 119.367 | 5.921  | 0.147 | 0.0138 |
| FBgn0035252 | 14.860  | 2.281  | 0.175 | 0.1188 |
| FBgn0039861 | 80.927  | 7.707  | 0.367 | 0.1472 |
| FBgn0033915 | 17.855  | 3.579  | 0.359 | 0.1831 |
| FBgn0029002 | 566.288 | 22.152 | 0.433 | 0.1733 |
| FBgn0032793 | 59.635  | 3.186  | 0.085 | 0.0203 |
| FBgn0033428 | 33.725  | 2.315  | 0.079 | 0.0181 |
| FBgn0001083 | 33.950  | 3.872  | 0.221 | 0.0752 |
| FBgn0004597 | 124.405 | 9.083  | 0.332 | 0.0815 |
| FBgn0033142 | 42.584  | 4.968  | 0.290 | 0.0917 |
| FBgn0005683 | 751.674 | 12.542 | 0.105 | 0.0088 |
| FBgn0035708 | 732.466 | 13.560 | 0.126 | 0.0110 |
| FBgn0035416 | 733.105 | 10.983 | 0.082 | 0.0206 |
| FBgn0011741 | 14.904  | 2.644  | 0.235 | 0.1917 |
| FBgn0039694 | 40.850  | 3.590  | 0.158 | 0.0384 |
| FBgn0036145 | 15.554  | 0.651  | 0.014 | 0.0207 |
| FBgn0031621 | 6.304   | 1.634  | 0.212 | 0.2769 |
| FBgn0033477 | 26.565  | 1.384  | 0.036 | 0.0184 |
| FBgn0032804 | 606.662 | 14.447 | 0.172 | 0.0180 |
| FBgn0029067 | 556.955 | 18.248 | 0.299 | 0.0596 |
| FBgn0004892 | 8.138   | 2.114  | 0.275 | 0.2881 |
| FBgn0039056 | 134.973 | 3.809  | 0.054 | 0.0024 |
| FBgn0034846 | 717.150 | 27.996 | 0.546 | 0.3658 |
| FBgn0036843 | 42.892  | 3.847  | 0.173 | 0.0355 |
| FBgn0037956 | 265.424 | 9.314  | 0.163 | 0.0212 |
| FBgn0036615 | 896.351 | 12.099 | 0.082 | 0.0014 |
| FBgn0003867 | 728.028 | 23.852 | 0.391 | 0.1282 |
| FBgn0042126 | 853.714 | 14.426 | 0.122 | 0.0034 |

|             |         |        |       |        |
|-------------|---------|--------|-------|--------|
| FBgn0038167 | 7.816   | 3.058  | 0.598 | 0.5711 |
| FBgn0030914 | 526.362 | 17.486 | 0.290 | 0.0548 |
| FBgn0051938 | 684.630 | 8.922  | 0.058 | 0.0028 |
| FBgn0019949 | 11.737  | 2.954  | 0.372 | 0.2783 |
| FBgn0036257 | 16.320  | 2.390  | 0.175 | 0.1002 |
| FBgn0031399 | 799.981 | 14.293 | 0.128 | 0.0040 |
| FBgn0025838 | 84.003  | 6.822  | 0.277 | 0.1297 |
| FBgn0028946 | 696.760 | 20.907 | 0.314 | 0.0687 |
| FBgn0010356 | 6.323   | 1.463  | 0.169 | 0.2170 |
| FBgn0029594 | 6.244   | 2.196  | 0.386 | 0.4190 |
| FBgn0033731 | 14.932  | 3.875  | 0.503 | 0.3477 |
| FBgn0032276 | 22.332  | 1.707  | 0.065 | 0.0447 |
| FBgn0027358 | 762.515 | 16.702 | 0.183 | 0.0337 |
| FBgn0032354 | 44.185  | 3.300  | 0.123 | 0.0226 |
| FBgn0039387 | 20.027  | 2.120  | 0.112 | 0.0601 |
| FBgn0039180 | 8.130   | 1.814  | 0.202 | 0.2126 |
| FBgn0011762 | 697.609 | 23.134 | 0.384 | 0.1411 |
| FBgn0029788 | 36.438  | 4.431  | 0.269 | 0.0756 |
| FBgn0001204 | 76.230  | 5.784  | 0.219 | 0.0272 |
| FBgn0021742 | 8.899   | 2.855  | 0.458 | 0.4188 |
| FBgn0011230 | 858.653 | 15.148 | 0.134 | 0.0046 |
| FBgn0050052 | 51.224  | 6.626  | 0.429 | 0.2037 |
| FBgn0035044 | 11.040  | 3.274  | 0.485 | 0.4048 |
| FBgn0031390 | 763.782 | 23.553 | 0.363 | 0.1047 |
| FBgn0039679 | 682.792 | 12.256 | 0.110 | 0.0023 |
| FBgn0024194 | 759.696 | 15.027 | 0.149 | 0.0137 |
| FBgn0029966 | 5.589   | 2.667  | 0.636 | 0.6532 |
| FBgn0051217 | 28.197  | 5.359  | 0.509 | 0.2783 |
| FBgn0031818 | 72.968  | 3.677  | 0.093 | 0.0101 |
| FBgn0023170 | 29.968  | 7.755  | 1.004 | 0.9951 |
| FBgn0038074 | 33.814  | 6.670  | 0.658 | 0.4850 |
| FBgn0032014 | 18.013  | 3.462  | 0.333 | 0.1852 |
| FBgn0025140 | 14.219  | 2.540  | 0.227 | 0.1738 |
| FBgn0022344 | 6.713   | 1.948  | 0.283 | 0.3349 |
| FBgn0039698 | 740.467 | 14.137 | 0.135 | 0.0241 |
| FBgn0033584 | 832.119 | 14.475 | 0.126 | 0.0049 |
| FBgn0037709 | 21.429  | 3.202  | 0.239 | 0.1350 |
| FBgn0030309 | 737.640 | 30.809 | 0.643 | 0.4424 |
| FBgn0031068 | 21.292  | 3.769  | 0.334 | 0.1376 |
| FBgn0028411 | 26.513  | 4.175  | 0.329 | 0.1471 |
| FBgn0036136 | 42.919  | 3.369  | 0.132 | 0.0230 |
| FBgn0010229 | 23.235  | 3.817  | 0.313 | 0.1329 |
| FBgn0010213 | 21.452  | 2.609  | 0.159 | 0.0599 |
| FBgn0000330 | 48.006  | 3.890  | 0.158 | 0.0421 |
| FBgn0033192 | 128.715 | 6.586  | 0.169 | 0.0109 |
| FBgn0029948 | 709.218 | 23.676 | 0.395 | 0.1323 |
| FBgn0038478 | 13.032  | 3.777  | 0.547 | 0.4566 |
| FBgn0032746 | 28.873  | 2.549  | 0.113 | 0.0399 |
| FBgn0030342 | 68.332  | 7.349  | 0.395 | 0.1550 |
| FBgn0039678 | 4.600   | 3.653  | 1.450 | 0.6325 |
| FBgn0038090 | 18.849  | 4.006  | 0.426 | 0.2456 |
| FBgn0051223 | 12.407  | 1.802  | 0.131 | 0.1347 |
| FBgn0039141 | 542.126 | 20.932 | 0.404 | 0.1404 |
| FBgn0037297 | 713.554 | 16.387 | 0.188 | 0.0497 |

|             |         |        |       |        |
|-------------|---------|--------|-------|--------|
| FBgn0052057 | 786.635 | 28.503 | 0.516 | 0.2650 |
| FBgn0003507 | 13.102  | 2.779  | 0.295 | 0.2242 |
| FBgn0038460 | 706.138 | 18.820 | 0.251 | 0.0408 |
| FBgn0039929 | 29.837  | 4.065  | 0.277 | 0.1086 |
| FBgn0037873 | 719.595 | 12.423 | 0.107 | 0.0024 |
| FBgn0025630 | 724.260 | 11.033 | 0.084 | 0.0162 |
| FBgn0032186 | 746.030 | 15.598 | 0.163 | 0.0131 |
| FBgn0038545 | 661.674 | 22.675 | 0.389 | 0.1854 |
| FBgn0034368 | 14.040  | 3.114  | 0.345 | 0.2645 |
| FBgn0035016 | 735.765 | 16.740 | 0.190 | 0.0271 |
| FBgn0010228 | 22.683  | 1.523  | 0.051 | 0.0388 |
| FBgn0031711 | 53.002  | 5.709  | 0.308 | 0.0846 |
| FBgn0008646 | 96.415  | 5.132  | 0.137 | 0.0222 |
| FBgn0030999 | 96.730  | 11.704 | 0.708 | 0.5413 |
| FBgn0000826 | 17.378  | 3.047  | 0.267 | 0.1456 |
| FBgn0027558 | 25.160  | 1.691  | 0.057 | 0.0287 |
| FBgn0037652 | 24.152  | 3.241  | 0.217 | 0.0764 |
| FBgn0033062 | 105.870 | 3.692  | 0.064 | 0.0194 |
| FBgn0031045 | 16.822  | 3.401  | 0.344 | 0.2470 |
| FBgn0038525 | 15.428  | 3.667  | 0.436 | 0.2926 |
| FBgn0032618 | 27.684  | 4.099  | 0.303 | 0.1190 |
| FBgn0035965 | 21.743  | 3.931  | 0.355 | 0.1981 |
| FBgn0022347 | 22.666  | 3.667  | 0.297 | 0.1384 |
| FBgn0052262 | 673.799 | 15.967 | 0.189 | 0.0570 |
| FBgn0052043 | 26.027  | 2.297  | 0.101 | 0.0346 |
| FBgn0043012 | 13.024  | 1.626  | 0.101 | 0.1104 |
| FBgn0030418 | 21.634  | 4.684  | 0.507 | 0.3191 |
| FBgn0039654 | 782.016 | 17.115 | 0.187 | 0.0150 |
| FBgn0035166 | 33.318  | 4.488  | 0.302 | 0.0898 |
| FBgn0011573 | 154.702 | 8.657  | 0.242 | 0.0338 |
| FBgn0032388 | 16.411  | 4.384  | 0.586 | 0.4393 |
| FBgn0030892 | 33.773  | 4.481  | 0.297 | 0.1020 |
| FBgn0004362 | 21.139  | 3.257  | 0.251 | 0.1075 |
| FBgn0030638 | 39.949  | 4.343  | 0.236 | 0.0680 |
| FBgn0030823 | 21.597  | 3.531  | 0.289 | 0.1511 |
| FBgn0052569 | 21.255  | 6.766  | 1.077 | 0.8939 |
| FBgn0037987 | 716.348 | 13.287 | 0.123 | 0.0035 |
| FBgn0035299 | 783.204 | 15.555 | 0.154 | 0.0093 |
| FBgn0027570 | 7.503   | 1.325  | 0.117 | 0.1683 |
| FBgn0039687 | 17.127  | 3.368  | 0.331 | 0.2076 |
| FBgn0025336 | 18.601  | 2.241  | 0.135 | 0.0763 |
| FBgn0033928 | 16.858  | 3.660  | 0.397 | 0.2564 |
| FBgn0003295 | 7.294   | 2.381  | 0.388 | 0.3913 |
| FBgn0031401 | 14.500  | 3.963  | 0.542 | 0.4070 |
| FBgn0039751 | 10.516  | 1.638  | 0.128 | 0.1530 |
| FBgn0040297 | 131.257 | 9.837  | 0.369 | 0.1128 |
| FBgn0031540 | 30.081  | 2.762  | 0.127 | 0.0493 |
| FBgn0035157 | 626.597 | 15.617 | 0.195 | 0.0293 |
| FBgn0035722 | 49.246  | 4.164  | 0.176 | 0.0269 |
| FBgn0030868 | 774.814 | 16.926 | 0.185 | 0.0130 |
| FBgn0034168 | 8.798   | 1.743  | 0.173 | 0.1972 |
| FBgn0038029 | 164.957 | 4.792  | 0.070 | 0.0025 |
| FBgn0032131 | 706.033 | 11.135 | 0.088 | 0.0251 |
| FBgn0033133 | 703.424 | 19.941 | 0.283 | 0.0503 |

|             |         |        |       |        |
|-------------|---------|--------|-------|--------|
| FBgn0035383 | 25.334  | 3.435  | 0.233 | 0.1004 |
| FBgn0015663 | 8.986   | 2.591  | 0.374 | 0.3194 |
| FBgn0020767 | 32.563  | 2.902  | 0.129 | 0.0377 |
| FBgn0015553 | 9.519   | 2.590  | 0.352 | 0.3166 |
| FBgn0015550 | 19.541  | 3.752  | 0.360 | 0.1868 |
| FBgn0027616 | 16.117  | 1.889  | 0.111 | 0.0987 |
| FBgn0031062 | 46.964  | 2.920  | 0.091 | 0.0220 |
| FBgn0035237 | 13.042  | 1.183  | 0.054 | 0.0698 |
| FBgn0026582 | 117.185 | 7.293  | 0.227 | 0.0442 |
| FBgn0031081 | 619.957 | 11.838 | 0.113 | 0.0049 |
| FBgn0040372 | 743.024 | 16.323 | 0.179 | 0.0262 |
| FBgn0000986 | 19.645  | 2.741  | 0.191 | 0.1093 |
| FBgn0029173 | 745.196 | 14.899 | 0.149 | 0.0208 |
| FBgn0015324 | 748.770 | 12.515 | 0.105 | 0.0192 |
| FBgn0033137 | 590.872 | 17.637 | 0.263 | 0.0661 |
| FBgn0039099 | 28.488  | 3.016  | 0.160 | 0.0659 |
| FBgn0003512 | 19.601  | 3.926  | 0.393 | 0.1953 |
| FBgn0037537 | 638.978 | 10.865 | 0.092 | 0.0156 |
| FBgn0031283 | 18.357  | 3.967  | 0.429 | 0.2821 |
| FBgn0016926 | 12.836  | 2.504  | 0.244 | 0.2038 |
| FBgn0029702 | 10.011  | 3.407  | 0.580 | 0.4923 |
| FBgn0036124 | 65.072  | 7.321  | 0.412 | 0.1662 |
| FBgn0053171 | 32.520  | 5.730  | 0.505 | 0.2761 |
| FBgn0004919 | 35.402  | 5.270  | 0.392 | 0.1502 |
| FBgn0031549 | 15.424  | 2.100  | 0.143 | 0.1169 |
| FBgn0036032 | 794.014 | 20.345 | 0.261 | 0.0395 |
| FBgn0028872 | 725.339 | 13.487 | 0.125 | 0.0051 |
| FBgn0050324 | 714.219 | 11.101 | 0.086 | 0.0027 |
| FBgn0030060 | 725.252 | 20.464 | 0.289 | 0.0910 |
| FBgn0038369 | 69.964  | 6.228  | 0.277 | 0.0529 |
| FBgn0032004 | 643.010 | 8.381  | 0.055 | 0.0036 |
| FBgn0032125 | 100.646 | 6.363  | 0.201 | 0.0184 |
| FBgn0010422 | 21.435  | 2.910  | 0.198 | 0.1068 |
| FBgn0036376 | 34.463  | 1.702  | 0.042 | 0.0109 |
| FBgn0052484 | 34.958  | 1.394  | 0.028 | 0.0103 |
| FBgn0030471 | 31.048  | 3.651  | 0.215 | 0.0594 |
| FBgn0038679 | 117.936 | 3.838  | 0.062 | 0.0070 |
| FBgn0030275 | 29.030  | 3.779  | 0.246 | 0.0760 |
| FBgn0005427 | 755.796 | 26.446 | 0.463 | 0.2014 |
| FBgn0030672 | 13.462  | 1.825  | 0.124 | 0.0931 |
| FBgn0038481 | 34.855  | 4.536  | 0.295 | 0.0815 |
| FBgn0030289 | 83.013  | 4.298  | 0.111 | 0.0223 |
| FBgn0034093 | 757.836 | 6.459  | 0.028 | 0.0011 |
| FBgn0038398 | 734.424 | 11.468 | 0.090 | 0.0046 |
| FBgn0053968 | 888.645 | 14.398 | 0.117 | 0.0029 |
| FBgn0032689 | 80.846  | 6.280  | 0.244 | 0.0380 |
| FBgn0002174 | 110.484 | 2.688  | 0.033 | 0.0026 |
| FBgn0030675 | 140.562 | 4.453  | 0.071 | 0.0058 |
| FBgn0052846 | 681.924 | 18.495 | 0.251 | 0.0797 |
| FBgn0000404 | 19.181  | 3.364  | 0.295 | 0.1479 |
| FBgn0004407 | 9.826   | 2.005  | 0.204 | 0.1948 |
| FBgn0034674 | 50.373  | 3.005  | 0.090 | 0.0184 |
| FBgn0038976 | 21.783  | 2.408  | 0.133 | 0.0638 |
| FBgn0033490 | 16.729  | 2.963  | 0.262 | 0.1370 |

|             |         |        |       |        |
|-------------|---------|--------|-------|--------|
| FBgn0035501 | 32.252  | 4.553  | 0.321 | 0.1242 |
| FBgn0032292 | 32.716  | 2.343  | 0.084 | 0.0292 |
| FBgn0027950 | 4.078   | 0.875  | 0.094 | 0.1778 |
| FBgn0031779 | 138.931 | 5.950  | 0.127 | 0.0048 |
| FBgn0051105 | 22.375  | 4.463  | 0.445 | 0.2262 |
| FBgn0063499 | 13.327  | 2.840  | 0.303 | 0.2026 |
| FBgn0014380 | 7.494   | 2.210  | 0.326 | 0.3406 |
| FBgn0032346 | 41.287  | 4.032  | 0.197 | 0.0560 |
| FBgn0040371 | 12.863  | 2.807  | 0.306 | 0.2518 |
| FBgn0037315 | 208.055 | 9.966  | 0.239 | 0.0322 |
| FBgn0039492 | 21.787  | 4.518  | 0.469 | 0.2815 |
| FBgn0034304 | 5.809   | 1.721  | 0.255 | 0.3033 |
| FBgn0011341 | 7.953   | 1.119  | 0.079 | 0.1143 |
| FBgn0033961 | 59.897  | 6.053  | 0.306 | 0.0759 |
| FBgn0030746 | 17.637  | 2.793  | 0.221 | 0.1072 |
| FBgn0029666 | 77.739  | 5.977  | 0.230 | 0.0318 |
| FBgn0035638 | 33.620  | 3.003  | 0.134 | 0.0466 |
| FBgn0046332 | 21.452  | 3.554  | 0.294 | 0.1622 |
| FBgn0034879 | 42.688  | 3.064  | 0.110 | 0.0182 |
| FBgn0037716 | 22.019  | 2.141  | 0.104 | 0.0649 |
| FBgn0030883 | 57.930  | 3.000  | 0.078 | 0.0148 |
| FBgn0036089 | 30.145  | 2.294  | 0.087 | 0.0246 |
| FBgn0000039 | 117.678 | 7.909  | 0.266 | 0.0518 |
| FBgn0027514 | 19.549  | 2.752  | 0.194 | 0.0832 |
| FBgn0037383 | 254.118 | 16.113 | 0.511 | 0.2584 |
| FBgn0038063 | 31.381  | 3.858  | 0.237 | 0.0605 |
| FBgn0015796 | 119.242 | 5.937  | 0.148 | 0.0180 |
| FBgn0034506 | 638.024 | 15.970 | 0.200 | 0.0412 |
| FBgn0026778 | 142.818 | 6.130  | 0.132 | 0.0079 |
| FBgn0046685 | 123.370 | 7.779  | 0.245 | 0.0346 |
| FBgn0031421 | 24.775  | 2.085  | 0.088 | 0.0518 |
| FBgn0040376 | 12.355  | 1.287  | 0.067 | 0.0689 |
| FBgn0039727 | 759.244 | 19.241 | 0.244 | 0.0625 |
| FBgn0020496 | 12.052  | 2.494  | 0.258 | 0.2067 |
| FBgn0041781 | 58.347  | 4.052  | 0.141 | 0.0384 |
| FBgn0033121 | 646.697 | 12.659 | 0.124 | 0.0111 |
| FBgn0031077 | 648.882 | 14.870 | 0.170 | 0.0218 |
| FBgn0034286 | 578.918 | 27.680 | 0.662 | 0.4684 |
| FBgn0008636 | 634.220 | 15.739 | 0.195 | 0.0170 |
| FBgn0015772 | 28.612  | 1.856  | 0.060 | 0.0203 |
| FBgn0037844 | 20.739  | 2.613  | 0.165 | 0.0636 |
| FBgn0031813 | 779.438 | 12.547 | 0.101 | 0.0084 |
| FBgn0050467 | 11.104  | 0.904  | 0.037 | 0.0578 |
| FBgn0028902 | 22.341  | 3.834  | 0.329 | 0.1528 |
| FBgn0000359 | 699.266 | 14.985 | 0.161 | 0.0187 |
| FBgn0035519 | 640.220 | 15.047 | 0.177 | 0.0116 |
| FBgn0038511 | 21.230  | 2.034  | 0.097 | 0.0430 |
| FBgn0010355 | 795.424 | 8.950  | 0.050 | 0.0165 |
| FBgn0024841 | 29.363  | 3.706  | 0.234 | 0.0781 |
| FBgn0000109 | 10.468  | 3.260  | 0.508 | 0.4401 |
| FBgn0066303 | 17.026  | 3.069  | 0.277 | 0.1568 |
| FBgn0033827 | 25.230  | 1.829  | 0.066 | 0.0337 |
| FBgn0003748 | 718.365 | 12.835 | 0.115 | 0.0119 |
| FBgn0040382 | 104.910 | 7.178  | 0.246 | 0.0456 |

|             |         |        |       |        |
|-------------|---------|--------|-------|--------|
| FBgn0028949 | 28.537  | 4.457  | 0.348 | 0.1204 |
| FBgn0034315 | 73.390  | 4.164  | 0.118 | 0.0116 |
| FBgn0039217 | 736.898 | 22.616 | 0.347 | 0.0920 |
| FBgn0035358 | 17.351  | 2.486  | 0.178 | 0.1119 |
| FBgn0024510 | 31.935  | 2.554  | 0.102 | 0.0399 |
| FBgn0035815 | 7.275   | 2.721  | 0.509 | 0.4993 |
| FBgn0036738 | 31.817  | 5.040  | 0.399 | 0.1652 |
| FBgn0038516 | 715.856 | 12.897 | 0.116 | 0.0120 |
| FBgn0015001 | 662.304 | 11.398 | 0.098 | 0.0080 |
| FBgn0045064 | 110.666 | 6.933  | 0.217 | 0.0309 |
| FBgn0027335 | 126.843 | 3.761  | 0.056 | 0.0041 |
| FBgn0033191 | 27.831  | 3.700  | 0.246 | 0.1208 |
| FBgn0003738 | 19.849  | 2.274  | 0.130 | 0.0604 |
| FBgn0052750 | 11.071  | 3.172  | 0.454 | 0.3536 |
| FBgn0033663 | 601.113 | 13.241 | 0.146 | 0.0214 |
| FBgn0000241 | 657.637 | 13.052 | 0.130 | 0.0427 |
| FBgn0039338 | 52.584  | 4.603  | 0.201 | 0.0443 |
| FBgn0032287 | 10.949  | 2.491  | 0.283 | 0.2353 |
| FBgn0038376 | 9.926   | 2.759  | 0.383 | 0.3550 |
| FBgn0033259 | 24.240  | 2.379  | 0.117 | 0.0393 |
| FBgn0004389 | 791.347 | 12.914 | 0.105 | 0.0028 |
| FBgn0001189 | 10.367  | 2.482  | 0.297 | 0.2614 |
| FBgn0031184 | 702.232 | 14.281 | 0.145 | 0.0114 |
| FBgn0029079 | 17.162  | 3.581  | 0.374 | 0.2430 |
| FBgn0033485 | 13.394  | 1.971  | 0.145 | 0.1054 |
| FBgn0032309 | 41.748  | 4.891  | 0.287 | 0.0885 |
| FBgn0031668 | 878.983 | 10.473 | 0.062 | 0.0005 |
| FBgn0019624 | 201.947 | 7.383  | 0.135 | 0.0049 |
| FBgn0011582 | 50.142  | 5.552  | 0.307 | 0.0779 |
| FBgn0030525 | 21.535  | 4.023  | 0.376 | 0.1675 |
| FBgn0038424 | 168.625 | 4.815  | 0.069 | 0.0035 |
| FBgn0030328 | 750.672 | 10.676 | 0.076 | 0.0054 |
| FBgn0034894 | 16.367  | 3.953  | 0.477 | 0.3024 |
| FBgn0052556 | 16.774  | 1.519  | 0.069 | 0.0579 |
| FBgn0035966 | 11.145  | 2.099  | 0.198 | 0.1950 |
| FBgn0032720 | 12.439  | 1.831  | 0.135 | 0.1283 |
| FBgn0035086 | 18.433  | 2.762  | 0.207 | 0.1121 |
| FBgn0028407 | 20.324  | 2.111  | 0.110 | 0.0640 |
| FBgn0035791 | 22.489  | 3.749  | 0.312 | 0.1699 |
| FBgn0000808 | 20.926  | 3.161  | 0.239 | 0.1386 |
| FBgn0013773 | 84.382  | 7.717  | 0.353 | 0.1095 |
| FBgn0003479 | 18.689  | 2.191  | 0.128 | 0.0611 |
| FBgn0036210 | 100.292 | 5.554  | 0.154 | 0.0212 |
| FBgn0004170 | 11.952  | 3.561  | 0.531 | 0.4217 |
| FBgn0000356 | 619.065 | 20.349 | 0.334 | 0.0986 |
| FBgn0035721 | 26.151  | 2.627  | 0.132 | 0.0379 |
| FBgn0033578 | 15.120  | 3.668  | 0.445 | 0.2951 |
| FBgn0020305 | 725.272 | 22.932 | 0.363 | 0.1041 |
| FBgn0035382 | 40.738  | 6.798  | 0.567 | 0.3762 |
| FBgn0037874 | 29.000  | 3.830  | 0.253 | 0.1152 |
| FBgn0050106 | 748.545 | 21.225 | 0.301 | 0.0639 |
| FBgn0035771 | 757.970 | 17.878 | 0.211 | 0.0335 |
| FBgn0040584 | 27.419  | 7.685  | 1.077 | 0.8950 |
| FBgn0034366 | 56.299  | 2.598  | 0.060 | 0.0094 |

|             |         |        |       |        |
|-------------|---------|--------|-------|--------|
| FBgn0030995 | 24.047  | 4.157  | 0.359 | 0.1663 |
| FBgn0037375 | 18.646  | 2.399  | 0.154 | 0.0720 |
| FBgn0034539 | 137.066 | 8.080  | 0.238 | 0.0416 |
| FBgn0046258 | 813.260 | 20.968 | 0.270 | 0.0441 |
| FBgn0032109 | 239.276 | 10.601 | 0.235 | 0.0287 |
| FBgn0038925 | 771.845 | 15.757 | 0.161 | 0.0394 |
| FBgn0029957 | 689.320 | 18.268 | 0.242 | 0.0431 |
| FBgn0003660 | 723.564 | 23.358 | 0.377 | 0.1161 |
| FBgn0034794 | 127.258 | 6.356  | 0.159 | 0.0205 |
| FBgn0032921 | 42.939  | 3.002  | 0.105 | 0.0162 |
| FBgn0035891 | 108.803 | 3.802  | 0.066 | 0.0054 |
| FBgn0033751 | 891.115 | 5.098  | 0.015 | 0.0016 |
| FBgn0037434 | 867.219 | 14.377 | 0.119 | 0.0046 |
| FBgn0033309 | 640.567 | 19.965 | 0.311 | 0.0958 |
| FBgn0037926 | 20.279  | 3.439  | 0.292 | 0.1451 |
| FBgn0031816 | 30.358  | 3.903  | 0.251 | 0.0829 |
| FBgn0037715 | 818.832 | 17.826 | 0.194 | 0.0157 |
| FBgn0032679 | 745.070 | 14.453 | 0.140 | 0.0076 |
| FBgn0036020 | 41.898  | 2.555  | 0.078 | 0.0187 |
| FBgn0031454 | 20.099  | 4.608  | 0.528 | 0.3425 |
| FBgn0030318 | 10.976  | 3.082  | 0.433 | 0.3707 |
| FBgn0039125 | 107.928 | 2.891  | 0.039 | 0.0020 |
| FBgn0035855 | 24.783  | 5.779  | 0.674 | 0.5306 |
| FBgn0051694 | 125.434 | 9.470  | 0.357 | 0.1010 |
| FBgn0022772 | 11.280  | 3.237  | 0.464 | 0.3910 |
| FBgn0030326 | 12.573  | 2.907  | 0.336 | 0.2539 |
| FBgn0037413 | 12.031  | 2.175  | 0.197 | 0.1603 |
| FBgn0038295 | 13.412  | 2.742  | 0.280 | 0.2211 |
| FBgn0037751 | 223.816 | 8.221  | 0.151 | 0.0184 |
| FBgn0034532 | 23.218  | 4.953  | 0.528 | 0.3173 |
| FBgn0033579 | 112.932 | 7.048  | 0.220 | 0.0563 |
| FBgn0011020 | 21.533  | 4.041  | 0.379 | 0.2084 |
| FBgn0034431 | 59.123  | 3.987  | 0.134 | 0.0223 |
| FBgn0012058 | 29.061  | 4.842  | 0.403 | 0.1737 |
| FBgn0040697 | 680.861 | 11.730 | 0.101 | 0.0118 |
| FBgn0034623 | 903.263 | 11.262 | 0.070 | 0.0019 |
| FBgn0038412 | 15.769  | 3.532  | 0.396 | 0.2859 |
| FBgn0019982 | 691.664 | 14.857 | 0.160 | 0.0243 |
| FBgn0051035 | 34.975  | 5.224  | 0.390 | 0.1457 |
| FBgn0034391 | 23.817  | 2.695  | 0.152 | 0.0801 |
| FBgn0050338 | 21.680  | 4.181  | 0.403 | 0.1907 |
| FBgn0035267 | 306.981 | 13.414 | 0.293 | 0.0575 |
| FBgn0039132 | 760.141 | 17.725 | 0.207 | 0.0208 |
| FBgn0032101 | 5.997   | 1.452  | 0.176 | 0.2312 |
| FBgn0021848 | 43.473  | 2.470  | 0.070 | 0.0193 |
| FBgn0037276 | 552.363 | 10.969 | 0.109 | 0.0127 |
| FBgn0038323 | 821.291 | 10.798 | 0.071 | 0.0005 |
| FBgn0032935 | 709.684 | 19.989 | 0.282 | 0.0565 |
| FBgn0037301 | 167.552 | 6.820  | 0.139 | 0.0253 |
| FBgn0033693 | 809.669 | 19.096 | 0.225 | 0.0251 |
| FBgn0035009 | 119.701 | 8.441  | 0.298 | 0.0605 |
| FBgn0027055 | 16.038  | 1.575  | 0.077 | 0.0606 |
| FBgn0034970 | 797.197 | 15.269 | 0.146 | 0.0470 |
| FBgn0003150 | 79.755  | 6.237  | 0.244 | 0.0450 |

|             |         |        |       |        |
|-------------|---------|--------|-------|--------|
| FBgn0034177 | 133.516 | 5.989  | 0.134 | 0.0101 |
| FBgn0039755 | 10.395  | 1.714  | 0.141 | 0.1523 |
| FBgn0031799 | 151.119 | 10.548 | 0.368 | 0.1095 |
| FBgn0033830 | 30.112  | 3.292  | 0.180 | 0.0641 |
| FBgn0051337 | 9.027   | 2.712  | 0.407 | 0.3904 |
| FBgn0052372 | 668.669 | 19.184 | 0.275 | 0.0700 |
| FBgn0005386 | 25.803  | 3.638  | 0.256 | 0.1135 |
| FBgn0035986 | 758.539 | 10.610 | 0.074 | 0.0031 |
| FBgn0035356 | 831.558 | 14.576 | 0.128 | 0.0040 |
| FBgn0040396 | 863.035 | 7.112  | 0.029 | 0.0026 |
| FBgn0034643 | 859.954 | 6.545  | 0.025 | 0.0055 |
| FBgn0051211 | 111.322 | 7.278  | 0.238 | 0.0429 |
| FBgn0031473 | 675.742 | 15.206 | 0.171 | 0.0104 |
| FBgn0032450 | 725.885 | 17.051 | 0.200 | 0.0172 |
| FBgn0039860 | 514.262 | 26.835 | 0.700 | 0.5292 |
| FBgn0033826 | 608.382 | 21.251 | 0.371 | 0.1263 |
| FBgn0031280 | 748.638 | 16.330 | 0.178 | 0.0149 |
| FBgn0038359 | 744.726 | 21.679 | 0.316 | 0.0698 |
| FBgn0035155 | 23.294  | 3.592  | 0.277 | 0.1007 |
| FBgn0039465 | 107.360 | 4.422  | 0.091 | 0.0166 |
| FBgn0034730 | 10.913  | 1.340  | 0.082 | 0.0998 |
| FBgn0027560 | 29.001  | 3.604  | 0.224 | 0.0641 |
| FBgn0028858 | 18.677  | 1.752  | 0.082 | 0.0670 |
| FBgn0037555 | 731.696 | 17.758 | 0.215 | 0.0310 |
| FBgn0030648 | 699.995 | 18.967 | 0.257 | 0.0377 |
| FBgn0015402 | 24.916  | 4.039  | 0.327 | 0.1598 |
| FBgn0032666 | 22.073  | 7.392  | 1.238 | 0.6994 |
| FBgn0025574 | 9.540   | 1.330  | 0.093 | 0.1164 |
| FBgn0050042 | 723.742 | 14.044 | 0.136 | 0.0146 |
| FBgn0033963 | 61.678  | 3.746  | 0.114 | 0.0217 |
| FBgn0026261 | 23.502  | 2.026  | 0.087 | 0.0370 |
| FBgn0026619 | 801.700 | 10.170 | 0.065 | 0.0035 |
| FBgn0034722 | 9.458   | 1.460  | 0.113 | 0.1343 |
| FBgn0027106 | 4.837   | 1.258  | 0.164 | 0.2474 |
| FBgn0037280 | 15.148  | 2.232  | 0.164 | 0.1010 |
| FBgn0030759 | 18.260  | 3.183  | 0.277 | 0.1639 |
| FBgn0032229 | 47.003  | 3.369  | 0.121 | 0.0189 |
| FBgn0032883 | 91.218  | 6.284  | 0.216 | 0.0236 |
| FBgn0011745 | 44.613  | 4.177  | 0.196 | 0.0500 |
| FBgn0036262 | 21.194  | 3.573  | 0.301 | 0.1770 |
| FBgn0044823 | 731.913 | 19.041 | 0.248 | 0.0503 |
| FBgn0030970 | 838.357 | 9.289  | 0.051 | 0.0100 |
| FBgn0040237 | 859.638 | 8.009  | 0.037 | 0.0015 |
| FBgn0036844 | 733.395 | 14.568 | 0.145 | 0.0140 |
| FBgn0038972 | 772.906 | 10.645 | 0.073 | 0.0012 |
| FBgn0011217 | 28.145  | 3.197  | 0.182 | 0.0566 |
| FBgn0001974 | 36.425  | 2.720  | 0.102 | 0.0194 |
| FBgn0030294 | 41.655  | 8.176  | 0.802 | 0.6995 |
| FBgn0034473 | 6.878   | 2.372  | 0.409 | 0.4122 |
| FBgn0030793 | 12.907  | 2.839  | 0.312 | 0.2670 |
| FBgn0033247 | 741.664 | 17.945 | 0.217 | 0.0465 |
| FBgn0025830 | 794.209 | 11.623 | 0.085 | 0.0050 |
| FBgn0062442 | 70.135  | 5.095  | 0.185 | 0.0273 |
| FBgn0034274 | 39.720  | 4.465  | 0.251 | 0.0765 |



|             |         |        |       |        |
|-------------|---------|--------|-------|--------|
| FBgn0004859 | 11.565  | 4.205  | 0.764 | 0.6897 |
| FBgn0035987 | 7.922   | 1.999  | 0.252 | 0.2708 |
| FBgn0034032 | 75.961  | 3.628  | 0.087 | 0.0165 |
| FBgn0031233 | 43.083  | 2.662  | 0.082 | 0.0179 |
| FBgn0040993 | 11.164  | 2.659  | 0.317 | 0.2605 |
| FBgn0036274 | 17.790  | 2.052  | 0.118 | 0.0623 |
| FBgn0052698 | 597.138 | 23.264 | 0.453 | 0.2759 |
| FBgn0030100 | 595.249 | 13.184 | 0.146 | 0.0247 |
| FBgn0037633 | 717.005 | 21.729 | 0.329 | 0.1026 |
| FBgn0035489 | 7.470   | 1.788  | 0.214 | 0.2538 |
| FBgn0034277 | 52.326  | 2.326  | 0.052 | 0.0143 |
| FBgn0032812 | 764.552 | 17.288 | 0.195 | 0.0244 |
| FBgn0032444 | 703.273 | 15.455 | 0.170 | 0.0407 |
| FBgn0035428 | 794.434 | 18.385 | 0.213 | 0.0254 |
| FBgn0013349 | 17.262  | 1.561  | 0.071 | 0.0536 |
| FBgn0036913 | 816.602 | 14.066 | 0.121 | 0.0034 |
| FBgn0038965 | 27.622  | 2.654  | 0.127 | 0.0381 |
| FBgn0036363 | 108.730 | 5.042  | 0.117 | 0.0330 |
| FBgn0051634 | 9.337   | 4.459  | 1.065 | 0.9237 |
| FBgn0033526 | 560.448 | 17.644 | 0.278 | 0.0478 |
| FBgn0004636 | 15.723  | 2.008  | 0.128 | 0.0688 |
| FBgn0016126 | 19.739  | 1.949  | 0.096 | 0.0405 |
| FBgn0040582 | 12.457  | 4.941  | 0.980 | 0.9710 |
| FBgn0034008 | 13.184  | 2.137  | 0.173 | 0.1340 |
| FBgn0003499 | 13.630  | 2.427  | 0.216 | 0.1733 |
| FBgn0038315 | 845.300 | 9.943  | 0.058 | 0.0013 |
| FBgn0052549 | 716.843 | 22.378 | 0.349 | 0.0936 |
| FBgn0052816 | 11.161  | 3.536  | 0.560 | 0.4620 |
| FBgn0035249 | 23.923  | 4.023  | 0.338 | 0.1702 |
| FBgn0023177 | 13.778  | 1.857  | 0.125 | 0.1016 |
| FBgn0032060 | 726.092 | 30.129 | 0.625 | 0.4144 |
| FBgn0011276 | 57.102  | 5.562  | 0.271 | 0.0516 |
| FBgn0032451 | 14.426  | 3.133  | 0.340 | 0.2131 |
| FBgn0047178 | 19.134  | 3.720  | 0.362 | 0.2284 |
| FBgn0038636 | 19.369  | 1.370  | 0.048 | 0.0392 |
| FBgn0000719 | 16.887  | 3.227  | 0.308 | 0.1754 |
| FBgn0039638 | 8.281   | 3.192  | 0.615 | 0.6017 |
| FBgn0051528 | 9.512   | 1.279  | 0.086 | 0.1112 |
| FBgn0031391 | 30.104  | 2.752  | 0.126 | 0.0305 |
| FBgn0038593 | 18.967  | 3.054  | 0.246 | 0.1449 |
| FBgn0035954 | 739.670 | 12.453 | 0.105 | 0.0254 |
| FBgn0031995 | 11.650  | 1.749  | 0.131 | 0.1428 |
| FBgn0020647 | 7.030   | 0.978  | 0.068 | 0.1061 |
| FBgn0035271 | 19.067  | 3.549  | 0.330 | 0.1535 |
| FBgn0022724 | 806.736 | 17.131 | 0.182 | 0.0121 |
| FBgn0051711 | 121.566 | 6.689  | 0.184 | 0.0140 |
| FBgn0037372 | 39.049  | 3.510  | 0.158 | 0.0415 |
| FBgn0039118 | 785.661 | 22.174 | 0.313 | 0.0682 |
| FBgn0037432 | 634.113 | 23.032 | 0.418 | 0.1543 |
| FBgn0030742 | 753.274 | 20.355 | 0.275 | 0.0464 |
| FBgn0033968 | 15.283  | 3.136  | 0.322 | 0.2280 |
| FBgn0031810 | 12.377  | 2.203  | 0.196 | 0.1664 |
| FBgn0038421 | 639.353 | 25.163 | 0.495 | 0.2384 |
| FBgn0032085 | 29.670  | 4.956  | 0.414 | 0.1776 |

|             |         |        |       |        |
|-------------|---------|--------|-------|--------|
| FBgn0044050 | 42.048  | 4.897  | 0.285 | 0.0733 |
| FBgn0034245 | 676.568 | 20.992 | 0.326 | 0.0766 |
| FBgn0036214 | 8.425   | 3.118  | 0.577 | 0.5740 |
| FBgn0038065 | 771.632 | 11.172 | 0.081 | 0.0040 |
| FBgn0004876 | 21.512  | 5.289  | 0.650 | 0.4997 |
| FBgn0035872 | 779.052 | 8.334  | 0.045 | 0.0253 |
| FBgn0033610 | 707.193 | 22.931 | 0.372 | 0.1134 |
| FBgn0037308 | 193.857 | 10.039 | 0.260 | 0.1010 |
| FBgn0025335 | 9.508   | 2.201  | 0.255 | 0.2399 |
| FBgn0003218 | 820.251 | 11.618 | 0.082 | 0.0146 |
| FBgn0030142 | 23.358  | 2.812  | 0.169 | 0.0940 |
| FBgn0002941 | 33.283  | 3.330  | 0.167 | 0.0401 |
| FBgn0031802 | 67.726  | 5.105  | 0.192 | 0.0212 |
| FBgn0000629 | 801.913 | 11.083 | 0.077 | 0.0028 |
| FBgn0032171 | 18.378  | 2.881  | 0.226 | 0.1103 |
| FBgn0022063 | 737.964 | 18.255 | 0.226 | 0.0254 |
| FBgn0038585 | 654.942 | 38.183 | 1.113 | 0.8401 |
| FBgn0035005 | 132.316 | 8.565  | 0.277 | 0.0530 |
| FBgn0031684 | 781.046 | 7.882  | 0.040 | 0.0056 |
| FBgn0029084 | 135.678 | 8.877  | 0.290 | 0.0551 |
| FBgn0031946 | 28.726  | 4.486  | 0.350 | 0.1611 |
| FBgn0000570 | 112.881 | 8.536  | 0.323 | 0.0825 |
| FBgn0031988 | 15.264  | 3.049  | 0.305 | 0.2088 |
| FBgn0034412 | 679.219 | 25.521 | 0.479 | 0.2218 |
| FBgn0030679 | 10.596  | 2.117  | 0.212 | 0.2112 |
| FBgn0002973 | 17.828  | 3.870  | 0.420 | 0.2830 |
| FBgn0043796 | 621.847 | 13.263 | 0.141 | 0.0212 |
| FBgn0021874 | 95.147  | 4.618  | 0.112 | 0.0045 |
| FBgn0027052 | 832.355 | 11.835 | 0.084 | 0.0088 |
| FBgn0033067 | 25.342  | 6.374  | 0.802 | 0.7185 |
| FBgn0038387 | 9.263   | 2.977  | 0.478 | 0.4433 |
| FBgn0052202 | 35.974  | 4.532  | 0.285 | 0.0888 |
| FBgn0020907 | 28.834  | 3.329  | 0.192 | 0.0810 |
| FBgn0039210 | 743.839 | 18.335 | 0.226 | 0.0528 |
| FBgn0036183 | 29.152  | 3.523  | 0.213 | 0.0726 |
| FBgn0040936 | 80.897  | 9.807  | 0.594 | 0.4301 |
| FBgn0029667 | 16.210  | 2.773  | 0.237 | 0.1511 |
| FBgn0030027 | 112.419 | 6.322  | 0.178 | 0.0204 |
| FBgn0011455 | 824.025 | 15.089 | 0.138 | 0.0057 |
| FBgn0024542 | 36.943  | 4.679  | 0.296 | 0.0810 |
| FBgn0036149 | 683.046 | 19.597 | 0.281 | 0.0974 |
| FBgn0034844 | 20.710  | 2.827  | 0.193 | 0.0934 |
| FBgn0052053 | 99.573  | 7.694  | 0.297 | 0.0641 |
| FBgn0031242 | 80.717  | 4.781  | 0.142 | 0.0388 |
| FBgn0037433 | 57.663  | 3.908  | 0.132 | 0.0135 |
| FBgn0037329 | 818.546 | 17.793 | 0.193 | 0.0154 |
| FBgn0032033 | 19.539  | 1.673  | 0.072 | 0.0551 |
| FBgn0036358 | 83.864  | 14.140 | 1.192 | 0.7364 |
| FBgn0036619 | 31.748  | 5.050  | 0.402 | 0.1748 |
| FBgn0034085 | 326.023 | 10.809 | 0.179 | 0.0121 |
| FBgn0037713 | 47.006  | 4.292  | 0.196 | 0.0346 |
| FBgn0038202 | 120.472 | 5.525  | 0.127 | 0.0095 |
| FBgn0027108 | 703.069 | 17.190 | 0.210 | 0.0250 |
| FBgn0016054 | 23.670  | 2.397  | 0.121 | 0.0507 |

|             |         |        |       |        |
|-------------|---------|--------|-------|--------|
| FBgn0034504 | 20.672  | 2.535  | 0.155 | 0.1003 |
| FBgn0039508 | 13.636  | 2.236  | 0.183 | 0.1568 |
| FBgn0015379 | 12.200  | 1.679  | 0.116 | 0.1008 |
| FBgn0043010 | 24.031  | 2.953  | 0.181 | 0.0621 |
| FBgn0001105 | 17.155  | 2.178  | 0.138 | 0.1052 |
| FBgn0051632 | 21.147  | 4.453  | 0.469 | 0.2700 |
| FBgn0031645 | 799.735 | 9.990  | 0.062 | 0.0044 |
| FBgn0037855 | 150.563 | 8.449  | 0.237 | 0.0311 |
| FBgn0052667 | 573.685 | 31.206 | 0.849 | 0.7642 |
| FBgn0036761 | 54.307  | 5.029  | 0.233 | 0.0636 |
| FBgn0028542 | 37.239  | 3.625  | 0.176 | 0.0729 |
| FBgn0017567 | 679.180 | 18.462 | 0.251 | 0.0351 |
| FBgn0037366 | 22.979  | 5.157  | 0.579 | 0.4049 |
| FBgn0033376 | 727.834 | 14.246 | 0.139 | 0.0178 |
| FBgn0033081 | 775.734 | 14.705 | 0.139 | 0.0300 |
| FBgn0022942 | 685.664 | 14.041 | 0.144 | 0.0059 |
| FBgn0005671 | 51.350  | 4.516  | 0.199 | 0.0296 |
| FBgn0004878 | 26.207  | 5.878  | 0.659 | 0.4899 |
| FBgn0035336 | 20.895  | 2.464  | 0.145 | 0.0653 |
| FBgn0039161 | 744.902 | 33.845 | 0.769 | 0.6371 |
| FBgn0033889 | 17.122  | 3.184  | 0.296 | 0.1835 |
| FBgn0024897 | 12.649  | 2.390  | 0.226 | 0.1658 |
| FBgn0039266 | 19.865  | 3.935  | 0.390 | 0.1932 |
| FBgn0036031 | 893.509 | 11.637 | 0.076 | 0.0013 |
| FBgn0032878 | 26.647  | 1.359  | 0.035 | 0.0167 |
| FBgn0036762 | 791.483 | 12.692 | 0.102 | 0.0052 |
| FBgn0038924 | 30.900  | 2.005  | 0.065 | 0.0152 |
| FBgn0001330 | 31.260  | 3.419  | 0.187 | 0.0409 |
| FBgn0037608 | 11.223  | 1.459  | 0.095 | 0.1081 |
| FBgn0027585 | 15.074  | 3.040  | 0.307 | 0.2248 |
| FBgn0039877 | 59.311  | 4.254  | 0.153 | 0.0234 |
| FBgn0037540 | 20.850  | 2.044  | 0.100 | 0.0728 |
| FBgn0051278 | 14.712  | 2.369  | 0.191 | 0.1261 |
| FBgn0030826 | 16.313  | 4.000  | 0.490 | 0.3180 |
| FBgn0050021 | 13.822  | 1.993  | 0.144 | 0.1028 |
| FBgn0052405 | 16.103  | 3.499  | 0.380 | 0.2339 |
| FBgn0035964 | 796.544 | 10.825 | 0.074 | 0.0031 |
| FBgn0025620 | 713.526 | 32.802 | 0.754 | 0.5540 |
| FBgn0031575 | 46.348  | 9.297  | 0.932 | 0.9021 |
| FBgn0031256 | 30.164  | 5.316  | 0.468 | 0.2656 |
| FBgn0035437 | 14.978  | 1.932  | 0.125 | 0.0853 |
| FBgn0036288 | 18.972  | 3.012  | 0.239 | 0.1085 |
| FBgn0030421 | 731.463 | 14.409 | 0.142 | 0.0082 |
| FBgn0034599 | 33.756  | 3.783  | 0.212 | 0.0524 |
| FBgn0026207 | 50.077  | 4.364  | 0.190 | 0.0454 |
| FBgn0035392 | 113.785 | 2.923  | 0.038 | 0.0095 |
| FBgn0031808 | 724.144 | 14.986 | 0.155 | 0.0078 |
| FBgn0028926 | 705.685 | 21.087 | 0.315 | 0.0695 |
| FBgn0039863 | 101.347 | 7.174  | 0.254 | 0.0730 |
| FBgn0041191 | 27.782  | 2.731  | 0.134 | 0.0431 |
| FBgn0031766 | 49.781  | 3.486  | 0.122 | 0.0180 |
| FBgn0028436 | 27.856  | 3.123  | 0.175 | 0.0654 |
| FBgn0032864 | 111.509 | 5.678  | 0.145 | 0.0340 |
| FBgn0011653 | 72.277  | 7.121  | 0.351 | 0.1177 |

|             |         |        |       |        |
|-------------|---------|--------|-------|--------|
| FBgn0004583 | 7.472   | 2.815  | 0.530 | 0.4973 |
| FBgn0031627 | 35.384  | 3.133  | 0.139 | 0.0294 |
| FBgn0027053 | 21.457  | 2.890  | 0.195 | 0.1085 |
| FBgn0034182 | 18.342  | 3.521  | 0.338 | 0.1938 |
| FBgn0027375 | 25.366  | 3.223  | 0.205 | 0.0626 |
| FBgn0027582 | 15.588  | 1.092  | 0.038 | 0.0415 |
| FBgn0030519 | 16.168  | 3.786  | 0.443 | 0.2848 |
| FBgn0031250 | 4.284   | 2.246  | 0.589 | 0.6429 |
| FBgn0031264 | 23.988  | 1.914  | 0.076 | 0.0378 |
| FBgn0034982 | 20.242  | 2.628  | 0.171 | 0.0903 |
| FBgn0031784 | 8.402   | 2.459  | 0.360 | 0.3698 |
| FBgn0039396 | 38.471  | 3.562  | 0.165 | 0.0471 |
| FBgn0030780 | 13.866  | 0.840  | 0.025 | 0.0310 |
| FBgn0030943 | 9.327   | 1.396  | 0.104 | 0.1135 |
| FBgn0035998 | 69.349  | 4.795  | 0.166 | 0.0169 |
| FBgn0051103 | 804.011 | 22.059 | 0.303 | 0.0619 |
| FBgn0052075 | 24.460  | 2.229  | 0.102 | 0.0576 |
| FBgn0034095 | 802.122 | 18.973 | 0.224 | 0.0248 |
| FBgn0035726 | 802.999 | 11.927 | 0.089 | 0.0011 |
| FBgn0036828 | 61.882  | 4.372  | 0.154 | 0.0174 |
| FBgn0010435 | 718.762 | 15.354 | 0.164 | 0.0184 |
| FBgn0033769 | 843.369 | 14.863 | 0.131 | 0.0042 |
| FBgn0038974 | 43.601  | 4.687  | 0.252 | 0.0801 |
| FBgn0035590 | 747.451 | 12.608 | 0.106 | 0.0057 |
| FBgn0034307 | 12.337  | 2.471  | 0.248 | 0.2050 |
| FBgn0037417 | 25.491  | 4.463  | 0.391 | 0.1614 |
| FBgn0033886 | 800.842 | 11.655 | 0.085 | 0.0072 |
| FBgn0037350 | 9.503   | 2.204  | 0.256 | 0.2491 |
| FBgn0034816 | 163.627 | 7.414  | 0.168 | 0.0115 |
| FBgn0038200 | 744.889 | 18.863 | 0.239 | 0.0316 |
| FBgn0050264 | 717.124 | 20.258 | 0.286 | 0.0565 |
| FBgn0031494 | 38.226  | 3.509  | 0.161 | 0.0509 |
| FBgn0035824 | 671.614 | 18.948 | 0.267 | 0.1207 |
| FBgn0028410 | 3.797   | 1.668  | 0.366 | 0.4607 |
| FBgn0040817 | 22.260  | 3.485  | 0.273 | 0.1361 |
| FBgn0064116 | 693.753 | 13.404 | 0.129 | 0.0270 |
| FBgn0029712 | 55.566  | 6.120  | 0.337 | 0.1182 |
| FBgn0035491 | 99.498  | 3.999  | 0.080 | 0.0032 |
| FBgn0037290 | 10.445  | 2.416  | 0.279 | 0.2831 |
| FBgn0000615 | 10.731  | 4.220  | 0.830 | 0.7944 |
| FBgn0032752 | 18.064  | 3.002  | 0.249 | 0.1453 |
| FBgn0053080 | 16.592  | 1.672  | 0.084 | 0.0843 |
| FBgn0034453 | 835.800 | 16.746 | 0.168 | 0.0102 |
| FBgn0036319 | 9.228   | 1.265  | 0.087 | 0.1073 |
| FBgn0005633 | 708.053 | 45.125 | 1.438 | 0.4686 |
| FBgn0030038 | 19.587  | 3.839  | 0.376 | 0.2117 |
| FBgn0038226 | 13.529  | 5.632  | 1.172 | 0.7857 |
| FBgn0038808 | 688.997 | 25.888 | 0.486 | 0.2281 |
| FBgn0040235 | 95.050  | 9.764  | 0.502 | 0.2595 |
| FBgn0052432 | 696.169 | 18.114 | 0.236 | 0.0723 |
| FBgn0036340 | 711.615 | 13.913 | 0.136 | 0.0103 |
| FBgn0010401 | 19.584  | 2.961  | 0.224 | 0.1440 |
| FBgn0032473 | 13.028  | 4.016  | 0.619 | 0.4999 |
| FBgn0039224 | 15.359  | 2.772  | 0.250 | 0.1566 |

|             |         |        |       |        |
|-------------|---------|--------|-------|--------|
| FBgn0030145 | 13.991  | 3.796  | 0.515 | 0.3933 |
| FBgn0052850 | 115.230 | 6.756  | 0.198 | 0.0251 |
| FBgn0053964 | 44.555  | 3.680  | 0.152 | 0.0515 |
| FBgn0038008 | 14.607  | 1.858  | 0.118 | 0.0799 |
| FBgn0010414 | 19.396  | 3.761  | 0.365 | 0.2204 |
| FBgn0001332 | 113.378 | 6.496  | 0.186 | 0.0160 |
| FBgn0053639 | 751.951 | 22.182 | 0.327 | 0.0927 |
| FBgn0038071 | 663.479 | 13.186 | 0.131 | 0.0103 |
| FBgn0003308 | 38.246  | 2.869  | 0.108 | 0.0239 |
| FBgn0038552 | 21.783  | 2.588  | 0.154 | 0.0561 |
| FBgn0027330 | 20.367  | 3.659  | 0.329 | 0.1722 |
| FBgn0025879 | 154.186 | 8.593  | 0.239 | 0.0372 |
| FBgn0033925 | 8.760   | 1.813  | 0.188 | 0.2041 |
| FBgn0030603 | 11.739  | 1.411  | 0.085 | 0.1057 |
| FBgn0030041 | 448.282 | 24.383 | 0.663 | 0.4726 |
| FBgn0036352 | 71.910  | 5.684  | 0.225 | 0.0558 |
| FBgn0037149 | 9.278   | 3.951  | 0.841 | 0.8055 |
| FBgn0004372 | 27.728  | 4.315  | 0.336 | 0.1211 |
| FBgn0038286 | 17.733  | 2.272  | 0.146 | 0.0871 |
| FBgn0001942 | 48.294  | 3.247  | 0.109 | 0.0228 |
| FBgn0020303 | 57.513  | 3.942  | 0.135 | 0.0125 |
| FBgn0032015 | 803.065 | 13.627 | 0.116 | 0.0098 |
| FBgn0032536 | 43.762  | 1.891  | 0.041 | 0.0129 |
| FBgn0035245 | 622.980 | 12.881 | 0.133 | 0.0087 |
| FBgn0050419 | 754.489 | 24.320 | 0.392 | 0.1294 |
| FBgn0014949 | 4.353   | 2.670  | 0.819 | 0.8482 |
| FBgn0037270 | 54.011  | 4.415  | 0.180 | 0.0251 |
| FBgn0032635 | 16.505  | 2.303  | 0.161 | 0.0961 |
| FBgn0042185 | 583.369 | 26.424 | 0.598 | 0.3756 |
| FBgn0020251 | 7.679   | 2.273  | 0.336 | 0.3401 |
| FBgn0033707 | 686.017 | 21.250 | 0.329 | 0.0967 |
| FBgn0038787 | 23.739  | 1.869  | 0.074 | 0.0409 |
| FBgn0029176 | 8.835   | 1.947  | 0.214 | 0.2329 |
| FBgn0033100 | 168.840 | 12.558 | 0.467 | 0.2064 |
| FBgn0010741 | 105.602 | 2.781  | 0.037 | 0.0014 |
| FBgn0034957 | 178.335 | 9.387  | 0.247 | 0.0723 |
| FBgn0032707 | 109.053 | 6.314  | 0.183 | 0.0142 |
| FBgn0038744 | 667.443 | 21.330 | 0.341 | 0.0887 |
| FBgn0028906 | 729.145 | 17.524 | 0.211 | 0.0203 |
| FBgn0031950 | 34.566  | 2.112  | 0.065 | 0.0229 |
| FBgn0010342 | 569.035 | 16.430 | 0.237 | 0.0385 |
| FBgn0031036 | 12.156  | 2.153  | 0.191 | 0.1557 |
| FBgn0032600 | 39.075  | 4.093  | 0.214 | 0.0723 |
| FBgn0034500 | 24.279  | 2.790  | 0.160 | 0.0695 |
| FBgn0039478 | 150.948 | 4.263  | 0.060 | 0.0156 |
| FBgn0036229 | 775.569 | 21.194 | 0.290 | 0.0543 |
| FBgn0020506 | 17.797  | 2.711  | 0.206 | 0.1020 |
| FBgn0011704 | 31.362  | 2.694  | 0.116 | 0.0513 |
| FBgn0040607 | 8.309   | 4.141  | 1.032 | 0.9635 |
| FBgn0039398 | 110.286 | 4.854  | 0.107 | 0.0122 |
| FBgn0034068 | 89.618  | 2.789  | 0.043 | 0.0111 |
| FBgn0051862 | 20.856  | 3.682  | 0.325 | 0.1799 |
| FBgn0011802 | 794.259 | 13.331 | 0.112 | 0.0025 |
| FBgn0028894 | 638.410 | 20.358 | 0.325 | 0.0769 |

|             |         |        |       |        |
|-------------|---------|--------|-------|--------|
| FBgn0030851 | 645.263 | 9.640  | 0.072 | 0.0064 |
| FBgn0035206 | 21.786  | 2.799  | 0.180 | 0.0978 |
| FBgn0000575 | 94.855  | 4.543  | 0.109 | 0.0064 |
| FBgn0052302 | 31.221  | 2.653  | 0.113 | 0.0290 |
| FBgn0028848 | 27.665  | 2.758  | 0.137 | 0.0525 |
| FBgn0031564 | 7.967   | 3.254  | 0.665 | 0.6384 |
| FBgn0053493 | 18.372  | 3.003  | 0.245 | 0.1463 |
| FBgn0050095 | 145.822 | 9.647  | 0.319 | 0.0770 |
| FBgn0036137 | 32.213  | 5.347  | 0.444 | 0.2080 |
| FBgn0034563 | 18.415  | 1.953  | 0.104 | 0.0720 |
| FBgn0032145 | 9.633   | 2.813  | 0.411 | 0.3780 |
| FBgn0037614 | 16.783  | 3.374  | 0.339 | 0.1921 |
| FBgn0030030 | 7.629   | 1.780  | 0.208 | 0.2439 |
| FBgn0032289 | 107.680 | 5.046  | 0.118 | 0.0228 |
| FBgn0005672 | 648.887 | 13.330 | 0.137 | 0.0401 |
| FBgn0015544 | 842.949 | 18.400 | 0.201 | 0.0175 |
| FBgn0036306 | 41.083  | 3.022  | 0.111 | 0.0293 |
| FBgn0031298 | 806.418 | 13.953 | 0.121 | 0.0065 |
| FBgn0032582 | 65.643  | 4.504  | 0.154 | 0.0291 |
| FBgn0035357 | 99.076  | 4.630  | 0.108 | 0.0109 |
| FBgn0030850 | 30.242  | 3.498  | 0.202 | 0.0697 |
| FBgn0038772 | 17.919  | 1.993  | 0.111 | 0.0689 |
| FBgn0038660 | 43.594  | 4.251  | 0.207 | 0.0376 |
| FBgn0039106 | 6.079   | 1.657  | 0.226 | 0.2661 |
| FBgn0063491 | 743.130 | 21.223 | 0.303 | 0.0621 |
| FBgn0029685 | 20.471  | 3.320  | 0.269 | 0.1453 |
| FBgn0004889 | 842.865 | 17.532 | 0.182 | 0.0345 |
| FBgn0035710 | 779.949 | 17.073 | 0.187 | 0.0149 |
| FBgn0003162 | 4.135   | 2.479  | 0.743 | 0.7858 |
| FBgn0051975 | 7.752   | 3.167  | 0.647 | 0.6360 |
| FBgn0032059 | 14.483  | 2.571  | 0.228 | 0.1405 |
| FBgn0032162 | 800.644 | 10.763 | 0.072 | 0.0013 |
| FBgn0035982 | 15.040  | 3.481  | 0.403 | 0.2527 |
| FBgn0052648 | 33.193  | 3.235  | 0.158 | 0.0700 |
| FBgn0037358 | 717.118 | 14.332 | 0.143 | 0.0139 |
| FBgn0011279 | 15.962  | 3.756  | 0.442 | 0.3103 |
| FBgn0034529 | 599.271 | 29.499 | 0.726 | 0.5685 |
| FBgn0052297 | 524.894 | 13.641 | 0.177 | 0.0173 |
| FBgn0030088 | 139.042 | 7.634  | 0.210 | 0.0206 |
| FBgn0027083 | 718.417 | 18.912 | 0.249 | 0.0362 |
| FBgn0030029 | 855.544 | 14.760 | 0.127 | 0.0039 |
| FBgn0000996 | 871.955 | 16.277 | 0.152 | 0.0071 |
| FBgn0003731 | 12.008  | 4.814  | 0.965 | 0.9548 |
| FBgn0032157 | 91.968  | 8.631  | 0.405 | 0.1430 |
| FBgn0036942 | 15.373  | 3.034  | 0.299 | 0.1945 |
| FBgn0051706 | 188.399 | 8.145  | 0.176 | 0.0117 |
| FBgn0034402 | 6.616   | 1.128  | 0.096 | 0.1608 |
| FBgn0051842 | 23.318  | 2.468  | 0.131 | 0.0722 |
| FBgn0034266 | 14.656  | 3.743  | 0.478 | 0.3742 |
| FBgn0000662 | 22.967  | 1.709  | 0.064 | 0.0326 |
| FBgn0028467 | 12.749  | 1.931  | 0.146 | 0.1447 |
| FBgn0025595 | 45.298  | 3.496  | 0.135 | 0.0286 |
| FBgn0053330 | 736.100 | 20.032 | 0.273 | 0.0453 |
| FBgn0035100 | 10.727  | 1.945  | 0.176 | 0.1412 |

|             |         |        |       |        |
|-------------|---------|--------|-------|--------|
| FBgn0003093 | 146.924 | 4.451  | 0.067 | 0.0023 |
| FBgn0002997 | 360.067 | 10.986 | 0.168 | 0.0113 |
| FBgn0032005 | 12.946  | 2.337  | 0.211 | 0.1604 |
| FBgn0034495 | 59.010  | 3.262  | 0.090 | 0.0109 |
| FBgn0013751 | 13.070  | 1.771  | 0.120 | 0.1366 |
| FBgn0029780 | 18.440  | 4.807  | 0.627 | 0.4732 |
| FBgn0031550 | 739.532 | 24.855 | 0.418 | 0.1859 |
| FBgn0028541 | 607.462 | 14.948 | 0.184 | 0.0218 |
| FBgn0051777 | 698.092 | 24.043 | 0.414 | 0.1499 |
| FBgn0038133 | 3.516   | 1.434  | 0.292 | 0.3975 |
| FBgn0031497 | 16.802  | 2.613  | 0.203 | 0.1390 |
| FBgn0033778 | 8.390   | 1.734  | 0.179 | 0.1807 |
| FBgn0035413 | 27.942  | 2.899  | 0.150 | 0.0607 |
| FBgn0036364 | 668.277 | 12.963 | 0.126 | 0.0043 |
| FBgn0030310 | 698.037 | 23.877 | 0.408 | 0.1427 |
| FBgn0038428 | 13.466  | 2.598  | 0.251 | 0.1835 |
| FBgn0001122 | 684.962 | 32.762 | 0.784 | 0.6607 |
| FBgn0031398 | 62.289  | 6.635  | 0.353 | 0.1163 |
| FBgn0032509 | 91.518  | 4.557  | 0.113 | 0.0301 |
| FBgn0034919 | 8.915   | 1.958  | 0.215 | 0.2349 |
| FBgn0035147 | 50.232  | 2.505  | 0.062 | 0.0215 |
| FBgn0001254 | 41.232  | 9.188  | 1.024 | 0.9674 |
| FBgn0035213 | 770.085 | 18.572 | 0.224 | 0.0247 |
| FBgn0038479 | 701.135 | 23.763 | 0.403 | 0.1360 |
| FBgn0035895 | 644.680 | 27.277 | 0.577 | 0.3444 |
| FBgn0035197 | 119.082 | 5.516  | 0.128 | 0.0148 |
| FBgn0052396 | 28.751  | 3.731  | 0.242 | 0.0845 |
| FBgn0034230 | 25.489  | 3.373  | 0.223 | 0.0783 |
| FBgn0010410 | 13.885  | 3.296  | 0.391 | 0.2927 |
| FBgn0038280 | 30.188  | 5.144  | 0.438 | 0.2053 |
| FBgn0032726 | 139.232 | 9.916  | 0.353 | 0.0969 |
| FBgn0032105 | 29.332  | 4.586  | 0.358 | 0.1850 |
| FBgn0026577 | 816.483 | 15.149 | 0.141 | 0.0073 |
| FBgn0027109 | 17.818  | 2.185  | 0.134 | 0.0693 |
| FBgn0034300 | 30.653  | 2.419  | 0.095 | 0.0340 |
| FBgn0052355 | 644.949 | 15.635 | 0.190 | 0.0150 |
| FBgn0037881 | 46.819  | 3.264  | 0.114 | 0.0405 |
| FBgn0037779 | 78.211  | 6.347  | 0.258 | 0.0670 |
| FBgn0037645 | 761.838 | 15.888 | 0.166 | 0.0170 |
| FBgn0015014 | 673.813 | 20.355 | 0.307 | 0.0683 |
| FBgn0036264 | 14.660  | 2.435  | 0.202 | 0.1347 |
| FBgn0030692 | 19.915  | 2.712  | 0.185 | 0.1069 |
| FBgn0034744 | 49.880  | 4.787  | 0.230 | 0.0500 |
| FBgn0028737 | 36.538  | 4.928  | 0.332 | 0.1292 |
| FBgn0034475 | 729.797 | 26.593 | 0.485 | 0.2259 |
| FBgn0039079 | 10.405  | 2.721  | 0.356 | 0.2977 |
| FBgn0031115 | 27.803  | 2.108  | 0.080 | 0.0433 |
| FBgn0033017 | 16.876  | 2.483  | 0.183 | 0.1172 |
| FBgn0040715 | 45.335  | 8.069  | 0.718 | 0.5634 |
| FBgn0053140 | 65.243  | 3.221  | 0.080 | 0.0104 |
| FBgn0030821 | 39.925  | 6.514  | 0.531 | 0.2975 |
| FBgn0050481 | 11.434  | 1.498  | 0.098 | 0.0942 |
| FBgn0034590 | 782.851 | 18.403 | 0.216 | 0.0218 |
| FBgn0015509 | 19.993  | 3.781  | 0.357 | 0.2164 |

|             |         |        |       |        |
|-------------|---------|--------|-------|--------|
| FBgn0020497 | 22.511  | 2.977  | 0.197 | 0.1001 |
| FBgn0050392 | 14.137  | 3.026  | 0.324 | 0.2054 |
| FBgn0004360 | 711.057 | 14.000 | 0.138 | 0.0407 |
| FBgn0024956 | 41.876  | 2.647  | 0.084 | 0.0198 |
| FBgn0036391 | 11.317  | 2.014  | 0.179 | 0.1613 |
| FBgn0036422 | 36.140  | 8.589  | 1.021 | 0.9706 |
| FBgn0003079 | 10.456  | 2.107  | 0.212 | 0.1842 |
| FBgn0041250 | 12.662  | 3.160  | 0.394 | 0.2894 |
| FBgn0031735 | 15.940  | 4.370  | 0.599 | 0.4521 |
| FBgn0030409 | 12.907  | 2.388  | 0.221 | 0.1832 |
| FBgn0020633 | 677.213 | 28.249 | 0.589 | 0.3625 |
| FBgn0052238 | 33.038  | 2.794  | 0.118 | 0.0332 |
| FBgn0015926 | 25.539  | 4.158  | 0.339 | 0.1696 |
| FBgn0036641 | 39.034  | 5.026  | 0.324 | 0.0918 |
| FBgn0036070 | 13.715  | 2.851  | 0.296 | 0.2167 |
| FBgn0051040 | 18.603  | 3.535  | 0.336 | 0.1965 |
| FBgn0039548 | 8.103   | 2.709  | 0.453 | 0.4445 |
| FBgn0032871 | 17.494  | 2.842  | 0.231 | 0.1242 |
| FBgn0026787 | 21.346  | 2.547  | 0.152 | 0.0690 |
| FBgn0005590 | 25.045  | 3.516  | 0.247 | 0.0767 |
| FBgn0032291 | 622.961 | 19.638 | 0.310 | 0.0689 |
| FBgn0033881 | 42.743  | 3.527  | 0.146 | 0.0322 |
| FBgn0031635 | 137.537 | 5.860  | 0.125 | 0.0168 |
| FBgn0041627 | 28.418  | 3.359  | 0.198 | 0.0582 |
| FBgn0032294 | 12.427  | 4.287  | 0.739 | 0.6538 |
| FBgn0024285 | 32.213  | 3.510  | 0.191 | 0.0782 |
| FBgn0001229 | 15.585  | 2.350  | 0.177 | 0.1202 |
| FBgn0036754 | 805.880 | 12.727 | 0.100 | 0.0021 |
| FBgn0037428 | 36.519  | 2.547  | 0.089 | 0.0302 |
| FBgn0031516 | 102.279 | 7.540  | 0.278 | 0.0502 |
| FBgn0052448 | 31.915  | 3.455  | 0.187 | 0.0577 |
| FBgn0028360 | 183.342 | 4.176  | 0.048 | 0.0012 |
| FBgn0028983 | 765.229 | 12.895 | 0.109 | 0.0102 |
| FBgn0038223 | 747.946 | 18.985 | 0.241 | 0.0311 |
| FBgn0038371 | 18.263  | 3.567  | 0.348 | 0.1941 |
| FBgn0033321 | 74.450  | 6.682  | 0.300 | 0.0763 |
| FBgn0015541 | 752.783 | 13.264 | 0.117 | 0.0095 |
| FBgn0051284 | 12.817  | 4.069  | 0.646 | 0.5433 |
| FBgn0053096 | 48.114  | 2.752  | 0.079 | 0.0129 |
| FBgn0034172 | 8.904   | 2.310  | 0.300 | 0.2876 |
| FBgn0033500 | 826.614 | 12.366 | 0.092 | 0.0055 |
| FBgn0031757 | 49.185  | 1.679  | 0.029 | 0.0093 |
| FBgn0039223 | 15.941  | 2.503  | 0.197 | 0.1187 |
| FBgn0036986 | 726.284 | 17.589 | 0.213 | 0.0321 |
| FBgn0035082 | 13.209  | 2.549  | 0.246 | 0.1850 |
| FBgn0035400 | 778.153 | 19.657 | 0.248 | 0.0398 |
| FBgn0037943 | 114.395 | 4.131  | 0.075 | 0.0044 |
| FBgn0037900 | 57.852  | 3.431  | 0.102 | 0.0218 |
| FBgn0020521 | 929.744 | 9.574  | 0.049 | 0.0003 |
| FBgn0014179 | 739.359 | 26.981 | 0.492 | 0.2359 |
| FBgn0031845 | 761.352 | 14.834 | 0.145 | 0.0298 |
| FBgn0029969 | 87.744  | 0.879  | 0.004 | 0.0009 |
| FBgn0004087 | 19.206  | 1.438  | 0.054 | 0.0437 |
| FBgn0030073 | 17.099  | 2.796  | 0.229 | 0.1276 |



|             |         |        |       |        |
|-------------|---------|--------|-------|--------|
| FBgn0036096 | 26.658  | 2.821  | 0.149 | 0.0406 |
| FBgn0039523 | 676.247 | 12.955 | 0.124 | 0.0080 |
| FBgn0028684 | 16.974  | 2.205  | 0.143 | 0.1163 |
| FBgn0035831 | 31.907  | 4.714  | 0.348 | 0.1475 |
| FBgn0038079 | 200.259 | 8.599  | 0.185 | 0.0316 |
| FBgn0036679 | 72.174  | 8.017  | 0.445 | 0.2122 |
| FBgn0039354 | 761.606 | 18.360 | 0.221 | 0.0318 |
| FBgn0033879 | 647.990 | 19.817 | 0.303 | 0.0698 |
| FBgn0032643 | 16.592  | 1.960  | 0.116 | 0.0886 |
| FBgn0004381 | 812.691 | 20.362 | 0.255 | 0.0370 |
| FBgn0034987 | 16.020  | 3.788  | 0.448 | 0.2808 |
| FBgn0035158 | 223.236 | 6.488  | 0.094 | 0.0031 |
| FBgn0040732 | 94.876  | 2.869  | 0.043 | 0.0057 |
| FBgn0031189 | 9.850   | 0.969  | 0.048 | 0.0680 |
| FBgn0025682 | 9.084   | 1.945  | 0.208 | 0.2336 |
| FBgn0015331 | 46.350  | 2.793  | 0.084 | 0.0107 |
| FBgn0035090 | 737.276 | 17.093 | 0.198 | 0.0190 |
| FBgn0032430 | 46.521  | 4.562  | 0.224 | 0.0476 |
| FBgn0037249 | 94.084  | 5.002  | 0.133 | 0.0241 |
| FBgn0037243 | 96.306  | 2.274  | 0.027 | 0.0024 |
| FBgn0036217 | 39.089  | 3.822  | 0.187 | 0.0535 |
| FBgn0038182 | 24.050  | 3.001  | 0.187 | 0.0927 |
| FBgn0038342 | 118.323 | 7.894  | 0.263 | 0.0793 |
| FBgn0029867 | 11.891  | 2.040  | 0.175 | 0.1380 |
| FBgn0035477 | 681.199 | 18.904 | 0.262 | 0.0627 |
| FBgn0015299 | 11.960  | 1.832  | 0.140 | 0.1611 |
| FBgn0051145 | 820.477 | 18.001 | 0.197 | 0.0270 |
| FBgn0031803 | 610.255 | 30.302 | 0.752 | 0.6103 |
| FBgn0032753 | 19.752  | 3.839  | 0.373 | 0.2251 |
| FBgn0029681 | 15.405  | 3.614  | 0.424 | 0.3041 |
| FBgn0051820 | 14.128  | 2.513  | 0.224 | 0.1607 |
| FBgn0027493 | 20.599  | 2.513  | 0.153 | 0.0866 |
| FBgn0036080 | 20.005  | 5.090  | 0.648 | 0.4847 |
| FBgn0031633 | 26.829  | 3.370  | 0.212 | 0.0779 |
| FBgn0003449 | 725.035 | 23.303 | 0.374 | 0.1141 |
| FBgn0028473 | 756.541 | 16.925 | 0.189 | 0.0147 |
| FBgn0000014 | 34.620  | 4.306  | 0.268 | 0.0801 |
| FBgn0038326 | 748.652 | 19.272 | 0.248 | 0.0339 |
| FBgn0032512 | 73.487  | 7.422  | 0.375 | 0.1824 |
